# Supplementary material for: Altered Retinoic Acid Metabolism in Diabetic Mouse Kidney Identified by 18O Isotopic Labeling and 2D Mass Spectrometry
Source: PLoS One. 2010 Jun 14;5(6):e11095. doi: 10.1371/journal.pone.0011095 (PMC2885420; doi:10.1371/journal.pone.0011095)
Supplement: Table S1 — Peptide Annotation Data (6.92 MB XLS) [file pone.0011095.s002.xls]

## Sheet: peptide ratios
Supplemental Table 1. Peptide Annotation data
RawFile	Scan	Sequence	Charge	SpRank	SpScore	XCorr	deltCn	SeqMass	Ratio	Sf	P	Protein	Accession	Protein ratio (control/db)	Standard Deviation
DBDB_34_02.raw	1957	R.CPLSDPVASVHLRLR[.A	2	2	505.7	2.756	0.1938	1723.94	2.17394	0.93	58	r-(Q9Z1N2) *REV* ORC1_MOUSE Origin recognition complex subunit 1 - Mus musculu	r-Q9Z1N2
DBDB_15_03.raw	4906	K.FDTDEDTK[.Q	2	1	517	2.035	0.1334	974.4	-	0.83	19	r-(Q9Z0R6) *REV* ITSN2_MOUSE Intersectin-2 - Mus musculus (Mouse)	r-Q9Z0R6
DBDB_05_01.raw	2196	K.SATEKELADLQEK.L	2	1	1131.1	2.915	0.1902	1461.74	-	0.97	138	r-(Q9Z0R6) *REV* ITSN2_MOUSE Intersectin-2 - Mus musculus (Mouse)	r-Q9Z0R6
DBDB_05_01.raw	7046	R.FVQQLARPLIGRHK[.Y	2	1	641.2	2.845	0.1335	1666.99	-	0.92	67	r-(Q9WV04) *REV* KIF9_MOUSE Kinesin-like protein KIF9 - Mus musculus (Mouse)	r-Q9WV04
DBDB_27_02.raw	3644	R.ELADWIQDETYQNFPDLNSR[.V	2	2	365.7	2.962	0.2216	2458.12	-	0.89	62	r-(Q9R1X5) *REV* MRP5_MOUSE Multidrug resistance-associated protein 5 - Mus mu	r-Q9R1X5
DBDB_06_03.raw	4075	R.TFLNLVSVSEKTSR[.T	2	1	512.1	2.802	0.2063	1584.86	-	0.83	42	r-(Q9R1K5) *REV* FZR_MOUSE Fizzy-related protein homolog - Mus musculus (Mouse	r-Q9R1K5
DBDB_02_02.raw	5857	R.ETQNNELGRKQSIPLK[.K	2	1	672.5	3.353	0.1662	1859	-	0.8	43	r-(Q9R0X2) *REV* ADEC1_MOUSE ADAM DEC1 precursor - Mus musculus (Mouse)	r-Q9R0X2
DBDB_20_03.raw	2026	K.FQSRLPLLAM*NGILK.T	2	1	762.1	3.466	0.215	1716.98	-	0.87	19	r-(Q9JM76) *REV* ARPC3_MOUSE Actin-related protein 2/3 complex subunit 3 - Mus	r-Q9JM76
DBDB_33_02.raw	1377	R.LVQTVTANANGGK.I	2	2	419.1	2.798	0.4016	1272.69	-	0.88	28	r-(Q9JJ80) *REV* BXDC1_MOUSE Brix domain-containing protein 1 - Mus musculus (	r-Q9JJ80
DBDB_20_02.raw	1613	R.LLPAVKELARELK[.A	2	1	515.4	2.915	0.2081	1483.93	-	0.95	19	r-(Q9EPN1) *REV* NBEA_MOUSE Protein neurobeachin - Mus musculus (Mouse)	r-Q9EPN1
DBDB_07_03.raw	3258	R.ALSLSLEAEEPESTSR[.S	2	1	371.8	3.109	0.278	1722.84	-	0.89	44	r-(Q9D7V2) *REV* LYSM2_MOUSE LysM and putative peptidoglycan-binding domain-co	r-Q9D7V2
DBDB_06_01.raw	2687	K.MLDGEVVELQQLR[.K	2	1	1316.8	3.361	0.1205	1533.8	0.87777	0.84	28	r-(Q9CS72) *REV* FLIP1_MOUSE Filamin-A-interacting protein 1 - Mus musculus (M	r-Q9CS72
DBDB_05_02.raw	3800	K.RDSIVFEKAFNQVVEK[.V	2	1	510.4	3.21	0.2229	1913.02	2.69148	0.91	49	r-(Q9CQI6) *REV* COTL1_MOUSE Coactosin-like protein - Mus musculus (Mouse)	r-Q9CQI6
DBDB_02_02.raw	2354	K.DTEPKTLSKGEAK.K	2	1	607.8	2.935	0.2713	1403.74	0.55847	0.97	150	r-(Q99MD9) *REV* NASP_MOUSE Nuclear autoantigenic sperm protein - Mus musculus	r-Q99MD9
DBDB_22_02.raw	3743	R.LRVKLEEAHSEK[.R	2	1	985.8	3.017	0.2046	1442.8	-	0.98	183	r-(Q924C6) *REV* LOXL4_MOUSE Lysyl oxidase homolog 4 precursor - Mus musculus	r-Q924C6
DBDB_04_03.raw	2858	K.EVSWEEIAQNFHEGLK.V	2	2	567.2	2.877	0.1238	1915.92	0.69296	0.93	87	r-(Q923J1) *REV* TRPM7_MOUSE Transient receptor potential cation channel subfa	r-Q923J1
DBDB_19_01.raw	1639	K.FIDGQETQALFFFMSKTK.H	2	1	471.6	2.865	0.1794	2138.06	1.01876	0.85	10	r-(Q921M3) *REV* SF3B3_MOUSE Splicing factor 3B subunit 3 - Mus musculus (Mous	r-Q921M3
DBDB_19_02.raw	1602	K.FIDGQETQALFFFMSKTK.H	2	2	479.9	2.846	0.2156	2138.06	0.95038	0.98	193	r-(Q921M3) *REV* SF3B3_MOUSE Splicing factor 3B subunit 3 - Mus musculus (Mous	r-Q921M3
DBDB_19_03.raw	1660	K.FIDGQETQALFFFMSKTK.H	2	2	498	2.918	0.2707	2138.06	0.93288	0.66	9	r-(Q921M3) *REV* SF3B3_MOUSE Splicing factor 3B subunit 3 - Mus musculus (Mous	r-Q921M3
DBDB_40_02.raw	3592	R.FAAMGQSAGDALIFKERLEM*NTR.G	3	1	638.6	3.242	0.2063	2572.26	-	0.77	4	r-(Q91ZU6) *REV* BPA1_MOUSE Bullous pemphigoid antigen 1, isoforms 1/2/3/4 - M	r-Q91ZU6
DBDB_40_03.raw	3756	R.FAAMGQSAGDALIFKERLEM*NTR.G	3	2	865.8	3.458	0.1764	2572.26	-	0.79	2	r-(Q91ZU6) *REV* BPA1_MOUSE Bullous pemphigoid antigen 1, isoforms 1/2/3/4 - M	r-Q91ZU6
DBDB_18_03.raw	4088	R.KVGILDPSTEETALM*M*K.C	2	2	304.4	2.743	0.2041	1894.95	-	0.8	18	r-(Q91ZU6) *REV* BPA1_MOUSE Bullous pemphigoid antigen 1, isoforms 1/2/3/4 - M	r-Q91ZU6
DBDB_23_01.raw	7265	R.YFITM*NSGQFSQEK.N	2	1	467.8	2.911	0.2846	1695.77	0.68881	0.71	34	r-(Q91ZJ9) *REV* HYAL1_MOUSE Hyaluronidase-1 precursor - Mus musculus (Mouse)	r-Q91ZJ9
DBDB_23_01.raw	8920	R.YFITM*NSGQFSQEK.N	2	1	403.1	2.803	0.3463	1695.77	0.76765	0.97	4	r-(Q91ZJ9) *REV* HYAL1_MOUSE Hyaluronidase-1 precursor - Mus musculus (Mouse)	r-Q91ZJ9
DBDB_23_02.raw	7161	R.YFITM*NSGQFSQEK.N	2	1	444	2.869	0.3713	1695.77	0.73872	0.86	37	r-(Q91ZJ9) *REV* HYAL1_MOUSE Hyaluronidase-1 precursor - Mus musculus (Mouse)	r-Q91ZJ9
DBDB_23_02.raw	8935	R.YFITM*NSGQFSQEK.N	2	1	505.2	2.751	0.3779	1695.77	0.68148	0.87	38	r-(Q91ZJ9) *REV* HYAL1_MOUSE Hyaluronidase-1 precursor - Mus musculus (Mouse)	r-Q91ZJ9
DBDB_23_03.raw	8965	R.YFITM*NSGQFSQEK.N	2	1	533.4	2.836	0.3203	1695.77	0.79557	0.97	4	r-(Q91ZJ9) *REV* HYAL1_MOUSE Hyaluronidase-1 precursor - Mus musculus (Mouse)	r-Q91ZJ9
DBDB_04_01.raw	2989	K.MPETHLELSGVVIIPK.L	3	2	776.4	3.349	0.3059	1762.98	0.47253	0.9	14	r-(Q91XQ0) *REV* DYH8_MOUSE Dynein heavy chain 8, axonemal - Mus musculus (Mou	r-Q91XQ0
DBDB_05_01.raw	3061	K.MPETHLELSGVVIIPK.L	3	2	713.8	3.554	0.2284	1762.98	0.67883	0.78	42	r-(Q91XQ0) *REV* DYH8_MOUSE Dynein heavy chain 8, axonemal - Mus musculus (Mou	r-Q91XQ0
DBDB_13_01.raw	1200	K.MTDLSLRTAK.Q	2	2	859.3	2.3	0.1622	1135.61	1.00313	0.57	19	r-(Q91XQ0) *REV* DYH8_MOUSE Dynein heavy chain 8, axonemal - Mus musculus (Mou	r-Q91XQ0
DBDB_23_03.raw	5303	K.VAPVDVEMDEEKPGASLPK[.A	2	1	472.9	3.006	0.1458	2015.01	-	0.81	37	r-(Q91WD1) *REV* RPC4_MOUSE DNA-directed RNA polymerase III subunit RPC4 - Mus	r-Q91WD1
DBDB_18_01.raw	4465	R.TYEEQLQGPDPPFFKVALR.L	2	1	420.7	2.874	0.1879	2235.14	-	0.95	94	r-(Q91VS8) *REV* FARP2_MOUSE FERM, RhoGEF and pleckstrin domain-containing pro	r-Q91VS8
DBDB_20_03.raw	3758	K.EYDLTAGAQLRLVGSHRDMSFK.S	2	2	545.6	3.338	0.1481	2494.25	0.18474	0.84	35	r-(Q8VHP6) *REV* PCD21_MOUSE Protocadherin-21 precursor - Mus musculus (Mouse)	r-Q8VHP6
DBDB_20_02.raw	1384	K.M*KTIKDEIGQLNQGAPR.T	2	1	492.4	2.991	0.2758	1915.01	-	0.9	27	r-(Q8VDD9) *REV* PHIP_MOUSE PH-interacting protein - Mus musculus (Mouse)	r-Q8VDD9
DBDB_20_03.raw	1476	K.M*KTIKDEIGQLNQGAPR.T	2	1	493	2.78	0.2654	1915.01	-	0.72	19	r-(Q8VDD9) *REV* PHIP_MOUSE PH-interacting protein - Mus musculus (Mouse)	r-Q8VDD9
DBDB_19_01.raw	3106	K.EPIAVLNQLEQKLDM*IDK[.C	2	1	300.3	2.832	0.1845	2117.12	-	0.77	43	r-(Q8R1Y2) *REV* CP045_MOUSE Uncharacterized protein C16orf45 homolog - Mus mu	r-Q8R1Y2
DBDB_23_03.raw	3589	R.FPLSLEFMNAIK.Q	2	1	548.5	2.439	0.1963	1409.75	0.51944	0.63	62	r-(Q8R1A4) *REV* DOCK7_MOUSE Dedicator of cytokinesis protein 7 - Mus musculus	r-Q8R1A4
DBDB_23_01.raw	3368	R.YM*LDILM*EPDEQHEK.M	2	2	437.7	2.432	0.0814	1922.85	0.79378	0.82	29	r-(Q8R1A4) *REV* DOCK7_MOUSE Dedicator of cytokinesis protein 7 - Mus musculus	r-Q8R1A4
DBDB_03_02.raw	4155	R.LTFQKLIESNSRGGVR[.V	2	1	466.7	2.884	0.1214	1809	0.85659	0.96	139	r-(Q8R151) *REV* ZNFX1_MOUSE NFX1-type zinc finger-containing protein 1 - Mus	r-Q8R151
DBDB_03_03.raw	4146	R.LTFQKLIESNSRGGVR[.V	2	1	437.9	3.01	0.1098	1809	0.79808	0.97	104	r-(Q8R151) *REV* ZNFX1_MOUSE NFX1-type zinc finger-containing protein 1 - Mus	r-Q8R151
DBDB_04_03.raw	4106	R.LTFQKLIESNSRGGVR[.V	2	1	634.5	2.974	0.2971	1809	-	0.66	21	r-(Q8R151) *REV* ZNFX1_MOUSE NFX1-type zinc finger-containing protein 1 - Mus	r-Q8R151
DBDB_21_03.raw	3307	R.SQTKVKEIFNNVK.Q	2	2	437.1	2.229	0.2045	1534.86	1.08791	0.88	21	r-(Q8K400) *REV* STXB5_MOUSE Syntaxin-binding protein 5 - Mus musculus (Mouse)	r-Q8K400
DBDB_21_03.raw	3347	R.SQTKVKEIFNNVK[.Q	2	2	484.4	3.046	0.1523	1538.86	0.82671	0.98	19	r-(Q8K400) *REV* STXB5_MOUSE Syntaxin-binding protein 5 - Mus musculus (Mouse)	r-Q8K400
DBDB_22_03.raw	4857	K.FNLWGERSNESVLLK[.I	2	1	1367.4	3.53	0.2163	1795.94	-	0.8	3	r-(Q8K0L3) *REV* ACSM2_MOUSE Acyl-coenzyme A synthetase ACSM2, mitochondrial p	r-Q8K0L3
DBDB_22_01.raw	4783	R.MQKVITSKGSEGAGLLLLR[.H	2	2	567	3.259	0.2484	2005.15	SHARED	0.96	81	r-(Q8CGK7) *REV* GNAL_MOUSE Guanine nucleotide-binding protein G(olf) subunit	r-Q8CGK7
DBDB_19_02.raw	3660	R.TAPFATVKYEDDVLLLVK.A	2	2	444.6	2.929	0.1514	2022.12	-	0.92	60	r-(Q8C7X2) *REV* K0090_MOUSE Uncharacterized protein KIAA0090 precursor - Mus	r-Q8C7X2
DBDB_23_02.raw	3553	R.SCVHDILLSVSDLNNDLK[.T	2	2	423.2	2.995	0.1604	2046.03	-	0.91	12	r-(Q8C6G8) *REV* WDR26_MOUSE WD repeat-containing protein 26 - Mus musculus (M	r-Q8C6G8
DBDB_20_03.raw	3400	K.QKNDRLTVYGNPLWSMSR[.G	2	1	464.5	3.189	0.1268	2169.09	-	0.79	42	r-(Q8C4V1) *REV* RHG24_MOUSE Rho GTPase-activating protein 24 - Mus musculus (	r-Q8C4V1
DBDB_18_03.raw	2188	K.CDDIGSHPRGIHQLSLGK[.N	2	1	321.1	3.13	0.3579	1994	-	0.92	32	r-(Q8C460) *REV* PRNIP_MOUSE Prion protein-interacting protein - Mus musculus	r-Q8C460
DBDB_22_02.raw	2270	K.DPDLINGDEDR[.V	2	1	994.5	2.992	0.2236	1262.55	-	0.91	57	r-(Q8C3J5) *REV* DOCK2_MOUSE Dedicator of cytokinesis protein 2 - Mus musculus	r-Q8C3J5
DBDB_06_03.raw	7562	R.SSTDLYTKLVTM*LKK[.Y	2	1	565.2	2.759	0.124	1747.96	-	0.55	25	r-(Q8C3J5) *REV* DOCK2_MOUSE Dedicator of cytokinesis protein 2 - Mus musculus	r-Q8C3J5
DBDB_19_03.raw	4045	R.LPVKGLGALEFINNILNARDK[.D	2	1	338.1	2.97	0.1904	2299.32	-	0.95	137	r-(Q8C129) *REV* LCAP_MOUSE Leucyl-cystinyl aminopeptidase - Mus musculus (Mou	r-Q8C129
DBDB_18_03.raw	2641	R.EIWM*NAFENDPNKEGK[.R	2	1	656.5	3.444	0.1455	1941.87	0.6504	0.92	54	r-(Q8BUR4) *REV* DOCK1_MOUSE Dedicator of cytokinesis protein 1 - Mus musculus	r-Q8BUR4
DBDB_21_01.raw	5960	K.GPIIQPMLSKALMYSAEAER[.S	2	1	764.9	2.828	0.2272	2209.14	-	0.94	19	r-(Q8BRH0) *REV* TMTC3_MOUSE Transmembrane and TPR repeat-containing protein 3	r-Q8BRH0
DBDB_21_02.raw	5980	K.GPIIQPMLSKALMYSAEAER[.S	2	1	681.6	2.899	0.2512	2209.14	-	0.97	136	r-(Q8BRH0) *REV* TMTC3_MOUSE Transmembrane and TPR repeat-containing protein 3	r-Q8BRH0
DBDB_25_01.raw	9627	K.EAIAEQLEELAR.K	2	2	1091.2	3.062	0.1925	1371.71	-	0.96	53	r-(Q8BIL5) *REV* HOOK1_MOUSE Hook homolog 1 - Mus musculus (Mouse)	r-Q8BIL5
DBDB_50_01.raw	3073	K.HPFDPPLFPSGAK[.W	2	1	483.2	2.804	0.1987	1413.72	-	0.84	9	r-(Q8BH05) *REV* ZN750_MOUSE Protein ZNF750 - Mus musculus (Mouse)	r-Q8BH05
DBDB_19_03.raw	1743	K.M*QSERDLAAKELENK.A	2	2	1414.9	3.66	0.1461	1777.87	0.57806	0.82	43	r-(Q8BGY3) *REV* LUZP2_MOUSE Leucine zipper protein 2 precursor - Mus musculus	r-Q8BGY3
DBDB_20_01.raw	2111	R.DMRVELLM*VLARCVNK.R	3	1	434	3.86	0.2043	1963.04	-	0.8	18	r-(Q8BFY9) *REV* TNPO1_MOUSE Transportin-1 - Mus musculus (Mouse)	r-Q8BFY9
DBDB_23_03.raw	2236	K.QFVSPEETTLTKPK.N	2	2	823.1	3.639	0.1412	1604.85	-	0.92	49	r-(Q810T2) *REV* CCNB3_MOUSE G2/mitotic-specific cyclin-B3 - Mus musculus (Mou	r-Q810T2
DBDB_34_02.raw	2614	R.LGQVTLGGSDEEDVPAPGGKR.G	2	2	345.9	3.364	0.1253	2082.05	-	0.99	3	r-(Q80YR4) *REV* ZN598_MOUSE Zinc finger protein 598 - Mus musculus (Mouse)	r-Q80YR4
DBDB_06_02.raw	1801	R.EEAGLQQAK.F	2	1	842.6	2.278	0.2067	973.495	0.63458	0.95	131	r-(Q80Y19) *REV* RHGBA_MOUSE Rho GTPase-activating protein 11A - Mus musculus	r-Q80Y19
DBDB_07_02.raw	1782	R.EEAGLQQAK.F	2	1	766.8	2.175	0.2323	973.495	0.91343	0.95	53	r-(Q80Y19) *REV* RHGBA_MOUSE Rho GTPase-activating protein 11A - Mus musculus	r-Q80Y19
DBDB_07_03.raw	1789	R.EEAGLQQAK.F	2	1	945.3	2.182	0.2111	973.495	0.86364	0.85	22	r-(Q80Y19) *REV* RHGBA_MOUSE Rho GTPase-activating protein 11A - Mus musculus	r-Q80Y19
DBDB_08_03.raw	1840	R.EEAGLQQAK.F	2	2	615.5	2.005	0.203	973.495	0.92656	0.87	35	r-(Q80Y19) *REV* RHGBA_MOUSE Rho GTPase-activating protein 11A - Mus musculus	r-Q80Y19
DBDB_06_02.raw	1832	R.EEAGLQQAK[.F	2	1	778.1	2.465	0.259	977.495	0.62391	0.84	25	r-(Q80Y19) *REV* RHGBA_MOUSE Rho GTPase-activating protein 11A - Mus musculus	r-Q80Y19
DBDB_08_03.raw	1856	R.EEAGLQQAK[.F	2	1	659.3	2.336	0.213	977.495	0.7917	0.95	97	r-(Q80Y19) *REV* RHGBA_MOUSE Rho GTPase-activating protein 11A - Mus musculus	r-Q80Y19
DBDB_16_03.raw	2813	R.EHHSVTEEDSVFENER.S	2	2	324.3	2.859	0.2407	1943.84	-	0.92	177	r-(Q80VP2) *REV* SPAT7_MOUSE Spermatogenesis-associated protein 7 homolog - Mu	r-Q80VP2
DBDB_02_01.raw	3722	K.LGPKEGDDEEALEVHVGR[.E	2	2	642.4	2.893	0.1476	1953.96	0.94694	0.93	100	r-(Q80UE6) *REV* WNK4_MOUSE Serine/threonine-protein kinase WNK4 - Mus musculu	r-Q80UE6
DBDB_05_02.raw	3722	R.VQFGEALAGGGEPMGQAKQVR.A	2	1	618.1	3.118	0.367	2130.08	-	0.97	124	r-(Q80U63) *REV* MFN2_MOUSE Mitofusin-2 - Mus musculus (Mouse)	r-Q80U63
DBDB_24_03.raw	4048	R.QEAELLRQELEQM*K[.D	2	1	496	3.06	0.1826	1764.88	-	0.98	188	r-(Q80TI1) *REV* PKHH1_MOUSE Pleckstrin homology domain-containing family H me	r-Q80TI1
DBDB_02_01.raw	4131	K.VLPDCGRVIDTGQYCK.V	2	1	755.5	3.168	0.2668	1880.91	-	0.85	54	r-(Q7TSK7) *REV* ATL2_MOUSE ADAMTS-like protein 2 precursor - Mus musculus (Mo	r-Q7TSK7
DBDB_02_02.raw	4143	K.VLPDCGRVIDTGQYCK.V	2	1	686.3	3.163	0.2949	1880.91	-	0.92	61	r-(Q7TSK7) *REV* ATL2_MOUSE ADAMTS-like protein 2 precursor - Mus musculus (Mo	r-Q7TSK7
DBDB_24_03.raw	2262	R.FSRGDPPCEQVR.C	2	1	328.2	2.557	0.2507	1447.68	-	0.96	121	r-(Q7TSK7) *REV* ATL2_MOUSE ADAMTS-like protein 2 precursor - Mus musculus (Mo	r-Q7TSK7
DBDB_22_01.raw	3084	R.RPGPAAGPSAREALSGKTQR.T	2	1	432.8	2.717	0.2325	2007.08	1.98928	0.92	63	r-(Q7TSF4) *REV* CQ076_MOUSE Leucine-rich repeat-containing protein C17orf76 h	r-Q7TSF4
DBDB_22_03.raw	3050	R.RPGPAAGPSAREALSGKTQR[.T	2	1	458.6	2.849	0.1381	2011.08	2.37066	0.91	2	r-(Q7TSF4) *REV* CQ076_MOUSE Leucine-rich repeat-containing protein C17orf76 h	r-Q7TSF4
DBDB_24_03.raw	2848	K.SVIVIKPGLQK.N	2	1	655.1	2.926	0.2285	1181.76	-	0.96	79	r-(Q7TN37) *REV* TRPM4_MOUSE Transient receptor potential cation channel subfa	r-Q7TN37
DBDB_04_01.raw	4734	R.EM*DESEPDDLEADAK[.A	2	1	848.7	2.805	0.2047	1713.67	0.87865	0.98	185	r-(Q6PHS9) *REV* CA2D2_MOUSE Voltage-dependent calcium channel subunit alpha-2	r-Q6PHS9
DBDB_04_03.raw	4774	R.EM*DESEPDDLEADAK[.A	2	1	1032.5	3.046	0.1704	1713.67	0.82524	0.97	87	r-(Q6PHS9) *REV* CA2D2_MOUSE Voltage-dependent calcium channel subunit alpha-2	r-Q6PHS9
DBDB_19_01.raw	2631	K.TVGIIEQVENQNM*APKVVKDR.S	2	1	620.2	3.41	0.2876	2384.26	0.70823	0.97	135	r-(Q6PFX2) *REV* CF065_MOUSE Coiled-coil domain-containing protein C6orf65 hom	r-Q6PFX2
DBDB_19_02.raw	2639	K.TVGIIEQVENQNM*APKVVKDR.S	2	1	767	3.287	0.1929	2384.26	0.80402	0.94	53	r-(Q6PFX2) *REV* CF065_MOUSE Coiled-coil domain-containing protein C6orf65 hom	r-Q6PFX2
DBDB_20_03.raw	1630	K.KGHEAGQLKTM*LTTK[.G	2	1	678	3.004	0.2853	1662.89	-	0.87	15	r-(Q6PDL0) *REV* DC1L2_MOUSE Cytoplasmic dynein 1 light intermediate chain 2 -	r-Q6PDL0
DBDB_38_02.raw	1571	K.EEDGQSSQDKGDIK[.E	2	2	446.4	2.89	0.1762	1539.68	-	0.73	13	r-(Q6P9J5) *REV* KANK4_MOUSE KN motif and ankyrin repeat domain-containing pro	r-Q6P9J5
DBDB_08_03.raw	4012	R.EYLHGSAVSFINIIDDK[.D	2	1	340.7	2.344	0.2671	1924.97	-	0.59	39	r-(Q6P5E4) *REV* UGGG1_MOUSE UDP-glucose:glycoprotein glucosyltransferase 1 pr	r-Q6P5E4
DBDB_09_01.raw	4051	R.EYLHGSAVSFINIIDDK[.D	2	1	321.2	2.062	0.1637	1924.97	-	0.93	105	r-(Q6P5E4) *REV* UGGG1_MOUSE UDP-glucose:glycoprotein glucosyltransferase 1 pr	r-Q6P5E4
DBDB_09_03.raw	4732	R.EYLHGSAVSFINIIDDK[.D	2	1	322.3	2.361	0.2654	1924.97	-	0.77	30	r-(Q6P5E4) *REV* UGGG1_MOUSE UDP-glucose:glycoprotein glucosyltransferase 1 pr	r-Q6P5E4
DBDB_44_02.raw	2728	R.HLGEM*VRAENR.L	2	1	342.8	2.052	0.1594	1327.65	0.92734	0.9	52	r-(Q6P5E4) *REV* UGGG1_MOUSE UDP-glucose:glycoprotein glucosyltransferase 1 pr	r-Q6P5E4
DBDB_44_03.raw	2725	R.HLGEM*VRAENR.L	2	1	477.7	2.024	0.1419	1327.65	1.08796	0.93	44	r-(Q6P5E4) *REV* UGGG1_MOUSE UDP-glucose:glycoprotein glucosyltransferase 1 pr	r-Q6P5E4
DBDB_07_02.raw	1689	-.MDLDGDYALTLPK[.Q	2	1	672.3	2.904	0.242	1455.71	-	0.82	35	r-(Q6P4U0) *REV* THS7B_MOUSE Thrombospondin type-1 domain-containing protein 7	r-Q6P4U0
DBDB_08_02.raw	2020	-.MDLDGDYALTLPK[.Q	2	1	786.9	3.189	0.3001	1455.71	-	0.98	3	r-(Q6P4U0) *REV* THS7B_MOUSE Thrombospondin type-1 domain-containing protein 7	r-Q6P4U0
DBDB_23_01.raw	2429	R.DRNKVLKPNLLPDR.I	2	1	925.1	3.236	0.1594	1677.98	-	0.95	82	r-(Q6NS45) *REV* CCD66_MOUSE Coiled-coil domain-containing protein 66 - Mus mu	r-Q6NS45
DBDB_23_02.raw	2393	R.DRNKVLKPNLLPDR.I	2	1	996.1	3.047	0.1661	1677.98	-	0.89	44	r-(Q6NS45) *REV* CCD66_MOUSE Coiled-coil domain-containing protein 66 - Mus mu	r-Q6NS45
DBDB_23_03.raw	2406	R.DRNKVLKPNLLPDR.I	2	1	942.8	3.367	0.1877	1677.98	-	0.84	44	r-(Q6NS45) *REV* CCD66_MOUSE Coiled-coil domain-containing protein 66 - Mus mu	r-Q6NS45
DBDB_18_01.raw	2203	K.FLKWNNSNKYDK[.L	2	1	1278.4	3.204	0.2909	1560.79	0.71368	0.89	43	r-(Q69ZK6) *REV* JHD2C_MOUSE Probable JmjC domain-containing histone demethyla	r-Q69ZK6
DBDB_18_02.raw	2221	K.FLKWNNSNKYDK[.L	2	2	1557.6	3.51	0.1892	1560.79	0.73993	0.97	133	r-(Q69ZK6) *REV* JHD2C_MOUSE Probable JmjC domain-containing histone demethyla	r-Q69ZK6
DBDB_33_03.raw	3693	R.KIDLWNQLLANK.Q	2	1	1045.2	2.814	0.3069	1455.83	0.74232	0.87	50	r-(Q69Z38) *REV* SG269_MOUSE Tyrosine-protein kinase-protein kinase SgK269 - M	r-Q69Z38
DBDB_37_02.raw	4626	R.NLKSTLHPPLPK.L	2	1	694.9	2.795	0.2516	1344.8	-	0.8	17	r-(Q69Z28) *REV* ATS16_MOUSE ADAMTS-16 precursor - Mus musculus (Mouse)	r-Q69Z28
DBDB_19_01.raw	3638	R.TKKSM*NVIATNLTNSR[.E	2	1	793.8	2.834	0.1763	1797.95	-	0.78	37	r-(Q65CL1) *REV* CTNA3_MOUSE Catenin alpha-3 - Mus musculus (Mouse)	r-Q65CL1
DBDB_21_01.raw	3314	R.TKKSM*NVIATNLTNSR[.E	2	1	690.2	2.774	0.0898	1797.95	-	0.85	46	r-(Q65CL1) *REV* CTNA3_MOUSE Catenin alpha-3 - Mus musculus (Mouse)	r-Q65CL1
DBDB_19_03.raw	2407	K.NNLELVALGVLAGVCK[.S	2	1	582.1	3.227	0.2192	1673.94	-	0.9	29	r-(Q62018) *REV* CTR9_MOUSE RNA polymerase-associated protein CTR9 homolog - M	r-Q62018
DBDB_25_01.raw	4530	K.VAM*YEELFTSNWLRGWVHLVAAR.D	3	1	587.2	3.119	0.1821	2764.4	0.42749	0.9	46	r-(Q61738) *REV* ITA7_MOUSE Integrin alpha-7 precursor [Contains: Integrin alp	r-Q61738
DBDB_25_03.raw	4427	K.VAM*YEELFTSNWLRGWVHLVAAR.D	3	2	511.5	4.017	0.2107	2764.4	0.21604	0.92	127	r-(Q61738) *REV* ITA7_MOUSE Integrin alpha-7 precursor [Contains: Integrin alp	r-Q61738
DBDB_27_01.raw	4429	K.VAM*YEELFTSNWLRGWVHLVAAR.D	3	1	687.1	3.811	0.3323	2764.4	-	0.98	160	r-(Q61738) *REV* ITA7_MOUSE Integrin alpha-7 precursor [Contains: Integrin alp	r-Q61738
DBDB_27_02.raw	4736	K.VAM*YEELFTSNWLRGWVHLVAAR.D	3	1	552.5	3.407	0.123	2764.4	0.089	0.98	129	r-(Q61738) *REV* ITA7_MOUSE Integrin alpha-7 precursor [Contains: Integrin alp	r-Q61738
DBDB_28_01.raw	4413	K.VAM*YEELFTSNWLRGWVHLVAAR.D	3	1	702.4	3.761	0.3188	2764.4	-	0.97	96	r-(Q61738) *REV* ITA7_MOUSE Integrin alpha-7 precursor [Contains: Integrin alp	r-Q61738
DBDB_28_01.raw	4540	K.VAM*YEELFTSNWLRGWVHLVAAR.D	3	2	461	3.776	0.3461	2764.4	-	0.98	180	r-(Q61738) *REV* ITA7_MOUSE Integrin alpha-7 precursor [Contains: Integrin alp	r-Q61738
DBDB_28_03.raw	4405	K.VAM*YEELFTSNWLRGWVHLVAAR.D	3	2	564	3.901	0.3081	2764.4	-	0.93	176	r-(Q61738) *REV* ITA7_MOUSE Integrin alpha-7 precursor [Contains: Integrin alp	r-Q61738
DBDB_28_03.raw	4533	K.VAM*YEELFTSNWLRGWVHLVAAR.D	3	2	505.3	3.8	0.2917	2764.4	-	0.93	47	r-(Q61738) *REV* ITA7_MOUSE Integrin alpha-7 precursor [Contains: Integrin alp	r-Q61738
DBDB_17_01.raw	2829	R.MPYLLWK.G	2	1	589.6	2.219	0.1831	950.517	0.71008	0.9	23	r-(Q61738) *REV* ITA7_MOUSE Integrin alpha-7 precursor [Contains: Integrin alp	r-Q61738
DBDB_17_02.raw	2791	R.MPYLLWK.G	2	1	571.8	2.298	0.1992	950.517	0.56455	0.83	12	r-(Q61738) *REV* ITA7_MOUSE Integrin alpha-7 precursor [Contains: Integrin alp	r-Q61738
DBDB_17_03.raw	2838	R.MPYLLWK.G	2	1	587.4	2.318	0.1816	950.517	0.64147	0.79	13	r-(Q61738) *REV* ITA7_MOUSE Integrin alpha-7 precursor [Contains: Integrin alp	r-Q61738
DBDB_18_02.raw	3285	R.SGRPGRPPFGGRDGGRGGM*R.G	2	1	548.6	2.835	0.282	2043.02	-	0.98	3	r-(Q61545) *REV* EWS_MOUSE RNA-binding protein EWS - Mus musculus (Mouse)	r-Q61545
DBDB_19_02.raw	3784	K.NIEIYAKKHSSLVLIDK.L	2	2	616.9	3.422	0.1862	1971.13	-	0.98	3	r-(Q61464) *REV* ZN638_MOUSE Zinc finger protein 638 - Mus musculus (Mouse)	r-Q61464
DBDB_20_02.raw	1569	R.VGIGINKKDEPNSGR.V	2	2	655.6	3.098	0.2869	1583.85	-	0.94	56	r-(Q5SUV2) *REV* MYBPP_MOUSE MYCBP-associated protein - Mus musculus (Mouse)	r-Q5SUV2
DBDB_23_03.raw	1670	R.ILEKQSSLDKK[.L	2	1	689.1	3.272	0.2072	1292.75	1.08926	0.79	2	r-(Q3U0J8) *REV* TBD2B_MOUSE TBC1 domain family member 2B - Mus musculus (Mous	r-Q3U0J8
DBDB_22_03.raw	1671	K.LDVAELQPSEQSK[.S	2	2	588.4	2.771	0.3138	1447.73	-	0.88	45	r-(Q3TZ89) *REV* SC31B_MOUSE Protein transport protein Sec31B - Mus musculus (	r-Q3TZ89
DBDB_10_01.raw	4545	K.EKSNSIMELAEQHK[.Q	2	1	481.4	2.777	0.2701	1647.81	-	0.98	27	r-(Q3TMH2) *REV* SCRN3_MOUSE Secernin-3 - Mus musculus (Mouse)	r-Q3TMH2
DBDB_23_01.raw	2179	R.ATVETVTDIVLR.Q	2	2	691.4	2.768	0.2226	1316.74	0.62243	0.96	53	r-(Q32MG2) *REV* SPERT_MOUSE Spermatid-associated protein - Mus musculus (Mous	r-Q32MG2
DBDB_04_03.raw	8845	R.AKLLVAALGLLLACPVRR.C	2	1	803.4	2.758	0.2405	1934.22	0.46699	0.96	17	r-(Q14CH0) *REV* K1946_MOUSE Uncharacterized protein KIAA1946 homolog precurso	r-Q14CH0
DBDB_13_01.raw	1297	K.VM*ERTKNVLGESNTEK.D	2	1	485.2	2.969	0.1462	1850.93	-	0.9	43	r-(Q06194) *REV* FA8_MOUSE Coagulation factor VIII precursor - Mus musculus (M	r-Q06194
DBDB_18_03.raw	2797	R.SVMVRILTNDDTGLGKMSK[.Y	2	1	420.9	2.764	0.1336	2069.08	-	0.92	15	r-(P97429) *REV* ANXA4_MOUSE Annexin A4 - Mus musculus (Mouse)	r-P97429
DBDB_03_01.raw	2220	K.YIHNFALAAGLRK.F	2	2	892.6	2.851	0.1289	1473.83	-	0.94	43	r-(P97313) *REV* PRKDC_MOUSE DNA-dependent protein kinase catalytic subunit -	r-P97313
DBDB_21_02.raw	5665	R.SYM*VALM*KYYCM*K.K	2	1	606.6	2.374	0.1243	1735.76	-	0.93	41	r-(P97313) *REV* PRKDC_MOUSE DNA-dependent protein kinase catalytic subunit -	r-P97313
DBDB_22_02.raw	5932	R.NEHPIMIEAIKIELR[.L	3	1	602.2	3.804	0.2304	1809.99	-	0.86	59	r-(P70669) *REV* PHEX_MOUSE Metalloendopeptidase homolog PEX - Mus musculus (M	r-P70669
DBDB_43_02.raw	1109	K.SLSPVKSVETIVR.F	2	1	770.2	3.105	0.1504	1414.83	-	0.98	154	r-(P70428) *REV* EXT2_MOUSE Exostosin-2 - Mus musculus (Mouse)	r-P70428
DBDB_05_01.raw	4783	K.DLLALVDNCVTELEK[.E	2	1	1135.8	3.231	0.2794	1735.89	0.28738	0.76	23	r-(P68510) *REV* 1433F_MOUSE 14-3-3 protein eta - Mus musculus (Mouse)	r-P68510
DBDB_05_01.raw	3419	K.EEPAKTGQGIKAR.E	2	1	1407.9	2.807	0.2446	1384.75	0.99459	0.68	22	r-(P68404) *REV* KPCB_MOUSE Protein kinase C beta type - Mus musculus (Mouse)	r-P68404
DBDB_05_02.raw	7510	K.EEPAKTGQGIKAR.E	2	1	903	2.437	0.2458	1384.75	-	0.95	62	r-(P68404) *REV* KPCB_MOUSE Protein kinase C beta type - Mus musculus (Mouse)	r-P68404
DBDB_05_03.raw	7766	K.EEPAKTGQGIKAR.E	2	1	819.8	2.187	0.1372	1384.75	1.31851	0.97	76	r-(P68404) *REV* KPCB_MOUSE Protein kinase C beta type - Mus musculus (Mouse)	r-P68404
DBDB_05_03.raw	8364	K.EEPAKTGQGIKAR.E	2	2	465.1	2.442	0.1703	1384.75	-	0.77	44	r-(P68404) *REV* KPCB_MOUSE Protein kinase C beta type - Mus musculus (Mouse)	r-P68404
DBDB_05_01.raw	3323	K.EEPAKTGQGIKAR[.E	2	2	765.2	2.62	0.1513	1388.75	-	0.98	97	r-(P68404) *REV* KPCB_MOUSE Protein kinase C beta type - Mus musculus (Mouse)	r-P68404
DBDB_05_01.raw	3454	K.EEPAKTGQGIKAR[.E	2	2	801.8	2.771	0.1988	1388.75	0.91396	0.95	87	r-(P68404) *REV* KPCB_MOUSE Protein kinase C beta type - Mus musculus (Mouse)	r-P68404
DBDB_05_03.raw	3289	K.EEPAKTGQGIKAR[.E	2	2	761.4	2.74	0.1437	1388.75	1.18025	0.8	6	r-(P68404) *REV* KPCB_MOUSE Protein kinase C beta type - Mus musculus (Mouse)	r-P68404
DBDB_05_03.raw	3765	K.EEPAKTGQGIKAR[.E	2	2	678.2	2.093	0.1236	1388.75	-	0.86	2	r-(P68404) *REV* KPCB_MOUSE Protein kinase C beta type - Mus musculus (Mouse)	r-P68404
DBDB_05_03.raw	7330	K.EEPAKTGQGIKAR[.E	2	2	632.9	2.346	0.2681	1388.75	1.46811	0.9	11	r-(P68404) *REV* KPCB_MOUSE Protein kinase C beta type - Mus musculus (Mouse)	r-P68404
DBDB_10_01.raw	1763	K.TENHVCQEQTRNK.W	2	1	559.3	3.31	0.2598	1643.76	-	0.87	16	r-(P58281) *REV* OPA1_MOUSE Dynamin-like 120 kDa protein, mitochondrial precur	r-P58281
DBDB_10_03.raw	1735	K.TENHVCQEQTRNK.W	2	1	660.5	3.126	0.2677	1643.76	-	0.78	50	r-(P58281) *REV* OPA1_MOUSE Dynamin-like 120 kDa protein, mitochondrial precur	r-P58281
DBDB_03_01.raw	2310	R.APPQPPLAPPPPHGGVAEPGER.D	2	1	399.8	3.457	0.3185	2168.12	-	0.95	32	r-(P55194) *REV* 3BP1_MOUSE SH3 domain-binding protein 1 - Mus musculus (Mouse	r-P55194
DBDB_03_03.raw	2301	R.APPQPPLAPPPPHGGVAEPGER.D	2	1	395.8	3.308	0.3108	2168.12	-	0.97	150	r-(P55194) *REV* 3BP1_MOUSE SH3 domain-binding protein 1 - Mus musculus (Mouse	r-P55194
DBDB_29_03.raw	3331	K.GREILFYGNEGWQSGWSNK.V	2	1	742.5	2.78	0.2054	2228.05	-	0.9	36	r-(P49935) *REV* CATH_MOUSE Cathepsin H precursor - Mus musculus (Mouse)	r-P49935
DBDB_24_02.raw	3277	K.EQQTRNELEHKK[.R	2	1	476.2	2.84	0.1871	1543.79	1.3165	0.83	40	r-(P48997) *REV* INVO_MOUSE Involucrin - Mus musculus (Mouse)	r-P48997
DBDB_34_02.raw	2981	K.VKTLLNSEQLKVLLR.S	2	2	807.2	2.852	0.1275	1754.09	0.73747	0.98	149	r-(P42225) *REV* STAT1_MOUSE Signal transducer and activator of transcription	r-P42225
DBDB_01_02.raw	3773	R.LEAALSGNTSEEMNMVK[.T	2	2	790.6	2.748	0.1214	1827.85	0.55099	0.97	142	r-(P42225) *REV* STAT1_MOUSE Signal transducer and activator of transcription	r-P42225
DBDB_22_02.raw	4685	K.VEKVMELATLNEK.V	2	2	554.3	2.753	0.1457	1503.81	2.59585	0.92	40	r-(P29452) *REV* CASP1_MOUSE Caspase-1 precursor - Mus musculus (Mouse)	r-P29452
DBDB_19_01.raw	1211	R.WLPTATAGCNVCER[.A	2	1	939.7	3.007	0	1638.76	SHARED	0.84	3	r-(P17679) *REV* GATA1_MOUSE Erythroid transcription factor - Mus musculus (Mo	r-P17679
DBDB_18_02.raw	1703	R.QLAPNTSLYQTFKTK[.D	2	1	352.7	2.839	0.149	1743.93	-	0.98	199	r-(P11260) *REV* TR22_MOUSE Putative transposase element L1Md-A101/L1Md-A102/L	r-P11260
DBDB_31_01.raw	2808	K.DALLLLFVTLTLLAFISLGMK[.E	3	1	1206.7	4.162	0.2292	2296.37	-	0.9	78	r-(P09690) *REV* ACHB_MOUSE Acetylcholine receptor subunit beta precursor - Mu	r-P09690
DBDB_34_03.raw	3124	R.KYTELLIDSHIPEVDM*LQK[.E	3	1	701.7	4.166	0.2724	2292.18	-	0.83	48	r-(P06800) *REV* CD45_MOUSE Leukocyte common antigen precursor - Mus musculus	r-P06800
DBDB_08_02.raw	2359	K.VEPGAVGIGFSPM*K[.L	2	2	347.5	2.19	0.2704	1408.72	-	0.78	14	r-(O55103) *REV* PRAX_MOUSE Periaxin - Mus musculus (Mouse)	r-O55103
DBDB_09_03.raw	3048	K.VEPGAVGIGFSPM*K[.L	2	1	336.3	2.418	0.252	1408.72	-	0.92	127	r-(O55103) *REV* PRAX_MOUSE Periaxin - Mus musculus (Mouse)	r-O55103
DBDB_20_01.raw	3752	R.VDPVAM*EPVKPLKM*EPLK.M	2	1	628.1	2.73	0.2146	2053.11	-	0.97	70	r-(O55103) *REV* PRAX_MOUSE Periaxin - Mus musculus (Mouse)	r-O55103
DBDB_16_02.raw	3450	K.LHTVAICFQR[.G	2	2	614.6	2.78	0.1263	1248.66	-	0.89	33	r-(O35710) *REV* NOCT_MOUSE Nocturnin - Mus musculus (Mouse)	r-O35710
DBDB_02_03.raw	3891	K.SNSHCYILQNNVTPLR[.D	2	2	369.1	3.32	0.2086	1919.95	0.98043	0.92	33	r-(O08688) *REV* CAN5_MOUSE Calpain-5 - Mus musculus (Mouse)	r-O08688
DBDB_19_03.raw	1286	R.WLENKINVITQGHR[.N	2	2	542.1	2.818	0.136	1711.93	-	0.94	75	r-(A2CI98) *REV* DYTN_MOUSE Dystrotelin - Mus musculus (Mouse)	r-A2CI98
DBDB_54_01.raw	5958	K.CELVAKTGEIVNVDK.L	2	1	678	2.661	0.1208	1674.88	-	0.94	86	r-(A2ASS6) *REV* TITIN_MOUSE Titin - Mus musculus (Mouse)	r-A2ASS6
DBDB_57_01.raw	2233	R.CEFHAPGFRKLR.L	2	2	477.9	2.112	0.2002	1517.79	-	0.97	2	r-(A2ASS6) *REV* TITIN_MOUSE Titin - Mus musculus (Mouse)	r-A2ASS6
DBDB_57_02.raw	3898	R.CEFHAPGFRKLR.L	2	1	325.6	2.548	0.1503	1517.79	-	0.91	54	r-(A2ASS6) *REV* TITIN_MOUSE Titin - Mus musculus (Mouse)	r-A2ASS6
DBDB_02_01.raw	2398	K.FVTLGFPHTMQDVHGLRK[.R	2	1	642.1	3.187	0.2964	2087.09	0.83901	0.97	2	r-(A2ARV4) *REV* LRP2_MOUSE Low-density lipoprotein receptor-related protein 2	r-A2ARV4
DBDB_02_02.raw	2423	K.FVTLGFPHTMQDVHGLRK[.R	2	1	620.5	3.13	0.3191	2087.09	0.83204	0.96	39	r-(A2ARV4) *REV* LRP2_MOUSE Low-density lipoprotein receptor-related protein 2	r-A2ARV4
DBDB_18_02.raw	1070	R.LIGM*TAKNQATKEK.V	2	2	654.2	2.772	0.2147	1548.84	0.64313	0.88	65	r-(A2AJB1) *REV* K1984_MOUSE Uncharacterized coiled-coil domain-containing pro	r-A2AJB1
DBDB_20_02.raw	3153	R.LQTQPPSLSGQPPMYSGTLDCFR[.K	2	1	321.9	2.841	0.1668	2584.23	-	0.98	134	(Q9Z2Z6) MCAT_MOUSE Mitochondrial carnitine/acylcarnitine carrier protein - Mu	Q9Z2Z6	NA	NA
DBDB_20_03.raw	3259	R.LQTQPPSLSGQPPMYSGTLDCFR[.K	2	1	429	4.124	0.4169	2584.23	-	0.7	8	(Q9Z2Z6) MCAT_MOUSE Mitochondrial carnitine/acylcarnitine carrier protein - Mu	Q9Z2Z6
DBDB_26_01.raw	4672	K.ASCPSLEFVGLM*TIGSFGHDLSQGPNPDFQR.L	3	1	604.6	4.292	0.5268	3380.58	0.86792	0.96	74	(Q9Z2Y8) PROSC_MOUSE Proline synthetase co-transcribed bacterial homolog prote	Q9Z2Y8	0.827399	0.116419
DBDB_26_02.raw	4615	K.ASCPSLEFVGLM*TIGSFGHDLSQGPNPDFQR.L	3	1	476.8	3.835	0.4177	3380.58	-	0.94	30	(Q9Z2Y8) PROSC_MOUSE Proline synthetase co-transcribed bacterial homolog prote	Q9Z2Y8
DBDB_26_03.raw	4653	K.ASCPSLEFVGLM*TIGSFGHDLSQGPNPDFQR[.L	3	1	663.3	5.15	0.4416	3384.58	-	0.89	43	(Q9Z2Y8) PROSC_MOUSE Proline synthetase co-transcribed bacterial homolog prote	Q9Z2Y8
DBDB_49_01.raw	3910	K.HGLLPSETIAVVEHIK.A	3	1	1449.1	4.326	0.4545	1742.98	-	0.97	97	(Q9Z2Y8) PROSC_MOUSE Proline synthetase co-transcribed bacterial homolog prote	Q9Z2Y8
DBDB_49_01.raw	4213	K.HGLLPSETIAVVEHIK.A	3	1	1710.3	5.173	0.5474	1742.98	-	0.84	10	(Q9Z2Y8) PROSC_MOUSE Proline synthetase co-transcribed bacterial homolog prote	Q9Z2Y8
DBDB_49_01.raw	4312	K.HGLLPSETIAVVEHIK.A	3	1	2820.5	5.292	0.48	1742.98	0.95574	0.85	112	(Q9Z2Y8) PROSC_MOUSE Proline synthetase co-transcribed bacterial homolog prote	Q9Z2Y8
DBDB_49_01.raw	4461	K.HGLLPSETIAVVEHIK.A	3	1	1595	4.557	0.5335	1742.98	0.72301	0.77	51	(Q9Z2Y8) PROSC_MOUSE Proline synthetase co-transcribed bacterial homolog prote	Q9Z2Y8
DBDB_49_01.raw	4669	K.HGLLPSETIAVVEHIK.A	3	1	1349.6	3.872	0.4671	1742.98	0.79462	0.51	5	(Q9Z2Y8) PROSC_MOUSE Proline synthetase co-transcribed bacterial homolog prote	Q9Z2Y8
DBDB_49_01.raw	4856	K.HGLLPSETIAVVEHIK.A	3	1	1538.6	4.261	0.4826	1742.98	0.76075	0.77	15	(Q9Z2Y8) PROSC_MOUSE Proline synthetase co-transcribed bacterial homolog prote	Q9Z2Y8
DBDB_49_02.raw	3634	K.HGLLPSETIAVVEHIK.A	3	1	763.8	3.497	0.451	1742.98	-	0.93	105	(Q9Z2Y8) PROSC_MOUSE Proline synthetase co-transcribed bacterial homolog prote	Q9Z2Y8
DBDB_49_02.raw	3729	K.HGLLPSETIAVVEHIK.A	3	1	898.5	3.268	0.391	1742.98	-	0.84	53	(Q9Z2Y8) PROSC_MOUSE Proline synthetase co-transcribed bacterial homolog prote	Q9Z2Y8
DBDB_49_02.raw	3829	K.HGLLPSETIAVVEHIK.A	3	1	2116.9	4.628	0.4458	1742.98	-	0.94	88	(Q9Z2Y8) PROSC_MOUSE Proline synthetase co-transcribed bacterial homolog prote	Q9Z2Y8
DBDB_49_02.raw	4126	K.HGLLPSETIAVVEHIK.A	3	1	2447	5.594	0.5055	1742.98	-	0.95	67	(Q9Z2Y8) PROSC_MOUSE Proline synthetase co-transcribed bacterial homolog prote	Q9Z2Y8
DBDB_49_02.raw	4697	K.HGLLPSETIAVVEHIK.A	3	1	2537.7	5.648	0.5266	1742.98	-	0.95	145	(Q9Z2Y8) PROSC_MOUSE Proline synthetase co-transcribed bacterial homolog prote	Q9Z2Y8
DBDB_49_02.raw	5073	K.HGLLPSETIAVVEHIK.A	3	1	2138.8	4.878	0.4705	1742.98	0.83678	0.98	147	(Q9Z2Y8) PROSC_MOUSE Proline synthetase co-transcribed bacterial homolog prote	Q9Z2Y8
DBDB_49_02.raw	5168	K.HGLLPSETIAVVEHIK.A	3	1	2064.3	5.547	0.5539	1742.98	0.92579	0.97	127	(Q9Z2Y8) PROSC_MOUSE Proline synthetase co-transcribed bacterial homolog prote	Q9Z2Y8
DBDB_49_02.raw	5532	K.HGLLPSETIAVVEHIK.A	3	1	2279.2	5.658	0.5341	1742.98	0.8812	0.98	220	(Q9Z2Y8) PROSC_MOUSE Proline synthetase co-transcribed bacterial homolog prote	Q9Z2Y8
DBDB_49_02.raw	6013	K.HGLLPSETIAVVEHIK.A	3	1	2108.7	5.809	0.4966	1742.98	0.79668	0.94	86	(Q9Z2Y8) PROSC_MOUSE Proline synthetase co-transcribed bacterial homolog prote	Q9Z2Y8
DBDB_49_02.raw	6339	K.HGLLPSETIAVVEHIK.A	3	1	2851.4	6.17	0.5339	1742.98	-	0.97	166	(Q9Z2Y8) PROSC_MOUSE Proline synthetase co-transcribed bacterial homolog prote	Q9Z2Y8
DBDB_49_02.raw	7471	K.HGLLPSETIAVVEHIK.A	3	1	1384.3	4.506	0.4395	1742.98	-	0.64	43	(Q9Z2Y8) PROSC_MOUSE Proline synthetase co-transcribed bacterial homolog prote	Q9Z2Y8
DBDB_49_03.raw	10686	K.HGLLPSETIAVVEHIK.A	3	1	1867.7	5.168	0.494	1742.98	0.89057	0.76	56	(Q9Z2Y8) PROSC_MOUSE Proline synthetase co-transcribed bacterial homolog prote	Q9Z2Y8
DBDB_49_03.raw	4225	K.HGLLPSETIAVVEHIK.A	3	1	2092.8	4.856	0.4542	1742.98	-	0.76	27	(Q9Z2Y8) PROSC_MOUSE Proline synthetase co-transcribed bacterial homolog prote	Q9Z2Y8
DBDB_49_03.raw	4325	K.HGLLPSETIAVVEHIK.A	3	1	2286	5.577	0.5266	1742.98	-	0.82	35	(Q9Z2Y8) PROSC_MOUSE Proline synthetase co-transcribed bacterial homolog prote	Q9Z2Y8
DBDB_49_03.raw	4995	K.HGLLPSETIAVVEHIK.A	3	1	2448.3	5.203	0.4947	1742.98	-	0.94	58	(Q9Z2Y8) PROSC_MOUSE Proline synthetase co-transcribed bacterial homolog prote	Q9Z2Y8
DBDB_49_03.raw	5296	K.HGLLPSETIAVVEHIK.A	3	1	2004.6	5.023	0.5407	1742.98	-	0.75	9	(Q9Z2Y8) PROSC_MOUSE Proline synthetase co-transcribed bacterial homolog prote	Q9Z2Y8
DBDB_49_03.raw	5629	K.HGLLPSETIAVVEHIK.A	3	1	2401.2	5.412	0.5682	1742.98	0.79918	0.96	28	(Q9Z2Y8) PROSC_MOUSE Proline synthetase co-transcribed bacterial homolog prote	Q9Z2Y8
DBDB_49_03.raw	5830	K.HGLLPSETIAVVEHIK.A	3	1	2383.8	5.306	0.4937	1742.98	0.88721	0.98	100	(Q9Z2Y8) PROSC_MOUSE Proline synthetase co-transcribed bacterial homolog prote	Q9Z2Y8
DBDB_49_03.raw	5926	K.HGLLPSETIAVVEHIK.A	3	1	2144.9	5.786	0.5674	1742.98	0.8331	0.97	141	(Q9Z2Y8) PROSC_MOUSE Proline synthetase co-transcribed bacterial homolog prote	Q9Z2Y8
DBDB_49_03.raw	6033	K.HGLLPSETIAVVEHIK.A	3	1	2406.3	5.487	0.5501	1742.98	0.77618	0.81	20	(Q9Z2Y8) PROSC_MOUSE Proline synthetase co-transcribed bacterial homolog prote	Q9Z2Y8
DBDB_49_03.raw	6521	K.HGLLPSETIAVVEHIK.A	3	1	905.6	3.21	0.3175	1742.98	0.826	0.98	2	(Q9Z2Y8) PROSC_MOUSE Proline synthetase co-transcribed bacterial homolog prote	Q9Z2Y8
DBDB_50_01.raw	4190	K.HGLLPSETIAVVEHIK.A	3	1	1168	3.783	0.421	1742.98	1.18502	0.59	2	(Q9Z2Y8) PROSC_MOUSE Proline synthetase co-transcribed bacterial homolog prote	Q9Z2Y8
DBDB_50_01.raw	4755	K.HGLLPSETIAVVEHIK.A	3	1	1064	3.485	0.197	1742.98	-	0.96	38	(Q9Z2Y8) PROSC_MOUSE Proline synthetase co-transcribed bacterial homolog prote	Q9Z2Y8
DBDB_49_01.raw	14048	K.HGLLPSETIAVVEHIK[.A	3	1	1715.9	4.609	0.4058	1746.98	0.91752	0.91	43	(Q9Z2Y8) PROSC_MOUSE Proline synthetase co-transcribed bacterial homolog prote	Q9Z2Y8
DBDB_49_01.raw	4506	K.HGLLPSETIAVVEHIK[.A	3	1	1701.9	5.117	0.3899	1746.98	0.78262	0.73	6	(Q9Z2Y8) PROSC_MOUSE Proline synthetase co-transcribed bacterial homolog prote	Q9Z2Y8
DBDB_49_01.raw	4696	K.HGLLPSETIAVVEHIK[.A	3	1	2070.6	4.755	0.3617	1746.98	-	0.93	57	(Q9Z2Y8) PROSC_MOUSE Proline synthetase co-transcribed bacterial homolog prote	Q9Z2Y8
DBDB_49_02.raw	4028	K.HGLLPSETIAVVEHIK[.A	3	1	2197.4	5.14	0.4902	1746.98	-	0.95	53	(Q9Z2Y8) PROSC_MOUSE Proline synthetase co-transcribed bacterial homolog prote	Q9Z2Y8
DBDB_49_02.raw	4312	K.HGLLPSETIAVVEHIK[.A	3	1	1949.3	5.077	0.4586	1746.98	-	0.62	51	(Q9Z2Y8) PROSC_MOUSE Proline synthetase co-transcribed bacterial homolog prote	Q9Z2Y8
DBDB_49_02.raw	4508	K.HGLLPSETIAVVEHIK[.A	3	1	1886.6	4.797	0.4036	1746.98	-	0.84	21	(Q9Z2Y8) PROSC_MOUSE Proline synthetase co-transcribed bacterial homolog prote	Q9Z2Y8
DBDB_49_02.raw	4603	K.HGLLPSETIAVVEHIK[.A	3	1	1972.3	5.098	0.471	1746.98	-	0.94	156	(Q9Z2Y8) PROSC_MOUSE Proline synthetase co-transcribed bacterial homolog prote	Q9Z2Y8
DBDB_49_03.raw	4812	K.HGLLPSETIAVVEHIK[.A	3	1	2089	4.965	0.4684	1746.98	-	0.94	25	(Q9Z2Y8) PROSC_MOUSE Proline synthetase co-transcribed bacterial homolog prote	Q9Z2Y8
DBDB_49_03.raw	5720	K.HGLLPSETIAVVEHIK[.A	3	1	2200	5.034	0.5099	1746.98	0.89205	0.9	21	(Q9Z2Y8) PROSC_MOUSE Proline synthetase co-transcribed bacterial homolog prote	Q9Z2Y8
DBDB_49_03.raw	6109	K.HGLLPSETIAVVEHIK[.A	3	1	1673.3	4.321	0.35	1746.98	-	0.8	52	(Q9Z2Y8) PROSC_MOUSE Proline synthetase co-transcribed bacterial homolog prote	Q9Z2Y8
DBDB_49_03.raw	6244	K.HGLLPSETIAVVEHIK[.A	3	1	1679.6	4.199	0.3491	1746.98	0.7971	0.94	34	(Q9Z2Y8) PROSC_MOUSE Proline synthetase co-transcribed bacterial homolog prote	Q9Z2Y8
DBDB_49_03.raw	6337	K.HGLLPSETIAVVEHIK[.A	3	1	2277.4	4.498	0.4099	1746.98	0.96695	0.8	56	(Q9Z2Y8) PROSC_MOUSE Proline synthetase co-transcribed bacterial homolog prote	Q9Z2Y8
DBDB_49_03.raw	6430	K.HGLLPSETIAVVEHIK[.A	3	1	2547.6	5.138	0.3865	1746.98	0.8324	0.91	22	(Q9Z2Y8) PROSC_MOUSE Proline synthetase co-transcribed bacterial homolog prote	Q9Z2Y8
DBDB_49_03.raw	6614	K.HGLLPSETIAVVEHIK[.A	3	1	1883.7	4.712	0.4202	1746.98	1.12152	0.95	8	(Q9Z2Y8) PROSC_MOUSE Proline synthetase co-transcribed bacterial homolog prote	Q9Z2Y8
DBDB_21_02.raw	3977	K.LMAVPNLSMLETVDSVK.L	2	1	393	3.679	0.402	1846.97	0.71192	0.68	8	(Q9Z2Y8) PROSC_MOUSE Proline synthetase co-transcribed bacterial homolog prote	Q9Z2Y8
DBDB_21_01.raw	3996	K.LMAVPNLSMLETVDSVK[.L	2	1	422.4	3.669	0.3882	1850.97	0.72045	0.96	97	(Q9Z2Y8) PROSC_MOUSE Proline synthetase co-transcribed bacterial homolog prote	Q9Z2Y8
DBDB_51_01.raw	1751	K.TKPADM*VIEAYGHGQR.T	2	1	469	3.418	0.4239	1788.87	0.65357	0.97	119	(Q9Z2Y8) PROSC_MOUSE Proline synthetase co-transcribed bacterial homolog prote	Q9Z2Y8
DBDB_23_01.raw	1472	K.VMVQINTSGEDSK.H	2	1	1179.8	3.207	0.4157	1407.68	0.85502	0.94	51	(Q9Z2Y8) PROSC_MOUSE Proline synthetase co-transcribed bacterial homolog prote	Q9Z2Y8
DBDB_23_03.raw	1433	K.VMVQINTSGEDSK.H	2	1	728.9	2.873	0.437	1407.68	0.84939	0.87	18	(Q9Z2Y8) PROSC_MOUSE Proline synthetase co-transcribed bacterial homolog prote	Q9Z2Y8
DBDB_23_02.raw	1536	K.VMVQINTSGEDSK[.H	2	1	987.5	3.121	0.4171	1411.68	0.95223	0.98	149	(Q9Z2Y8) PROSC_MOUSE Proline synthetase co-transcribed bacterial homolog prote	Q9Z2Y8
DBDB_24_01.raw	3660	R.TFGENYVQELLEK.A	2	1	1174.8	3.073	0.2817	1569.78	0.74193	0.98	101	(Q9Z2Y8) PROSC_MOUSE Proline synthetase co-transcribed bacterial homolog prote	Q9Z2Y8
DBDB_24_02.raw	3794	R.TFGENYVQELLEK.A	2	1	2001.6	4.027	0.4079	1569.78	0.7761	0.57	34	(Q9Z2Y8) PROSC_MOUSE Proline synthetase co-transcribed bacterial homolog prote	Q9Z2Y8
DBDB_24_03.raw	3713	R.TFGENYVQELLEK.A	2	1	1287	3.262	0.3466	1569.78	0.70743	0.97	39	(Q9Z2Y8) PROSC_MOUSE Proline synthetase co-transcribed bacterial homolog prote	Q9Z2Y8
DBDB_24_03.raw	3850	R.TFGENYVQELLEK.A	2	1	1857.9	4.02	0.459	1569.78	0.76186	0.94	6	(Q9Z2Y8) PROSC_MOUSE Proline synthetase co-transcribed bacterial homolog prote	Q9Z2Y8
DBDB_24_01.raw	3793	R.TFGENYVQELLEK[.A	2	1	1716	4.398	0.4118	1573.78	0.63546	0.93	47	(Q9Z2Y8) PROSC_MOUSE Proline synthetase co-transcribed bacterial homolog prote	Q9Z2Y8
DBDB_24_01.raw	3937	R.TFGENYVQELLEK[.A	2	1	1232.4	3.365	0.3712	1573.78	-	0.97	53	(Q9Z2Y8) PROSC_MOUSE Proline synthetase co-transcribed bacterial homolog prote	Q9Z2Y8
DBDB_24_02.raw	3680	R.TFGENYVQELLEK[.A	2	1	1710.2	4.227	0.448	1573.78	0.70885	0.97	222	(Q9Z2Y8) PROSC_MOUSE Proline synthetase co-transcribed bacterial homolog prote	Q9Z2Y8
DBDB_24_02.raw	3815	R.TFGENYVQELLEK[.A	2	1	1727.1	4.474	0.3964	1573.78	0.71369	0.94	79	(Q9Z2Y8) PROSC_MOUSE Proline synthetase co-transcribed bacterial homolog prote	Q9Z2Y8
DBDB_24_03.raw	3736	R.TFGENYVQELLEK[.A	2	1	1459.2	4.567	0.4353	1573.78	0.6842	0.93	61	(Q9Z2Y8) PROSC_MOUSE Proline synthetase co-transcribed bacterial homolog prote	Q9Z2Y8
DBDB_24_03.raw	3978	R.TFGENYVQELLEK[.A	2	1	1258.1	3.006	0.3036	1573.78	0.91917	0.96	90	(Q9Z2Y8) PROSC_MOUSE Proline synthetase co-transcribed bacterial homolog prote	Q9Z2Y8
DBDB_25_01.raw	3988	K.GFFELFPSVSR.N	2	1	929.9	2.637	0.1951	1285.66	1.23473	0.97	135	(Q9Z2W0) DNPEP_MOUSE Aspartyl aminopeptidase - Mus musculus (Mouse)	Q9Z2W0	1.21088	0.198671
DBDB_25_02.raw	4050	K.GFFELFPSVSR.N	2	1	1051.7	2.577	0.3309	1285.66	1.19711	0.96	99	(Q9Z2W0) DNPEP_MOUSE Aspartyl aminopeptidase - Mus musculus (Mouse)	Q9Z2W0
DBDB_25_02.raw	4029	K.GFFELFPSVSR[.N	2	1	856.1	3.11	0.3562	1289.66	1.29654	0.98	149	(Q9Z2W0) DNPEP_MOUSE Aspartyl aminopeptidase - Mus musculus (Mouse)	Q9Z2W0
DBDB_21_02.raw	3382	R.EVAGQVGVPLQDLMVR[.N	2	1	399.4	2.482	0.2434	1714.92	-	0.93	41	(Q9Z2W0) DNPEP_MOUSE Aspartyl aminopeptidase - Mus musculus (Mouse)	Q9Z2W0
DBDB_24_02.raw	2116	R.LTAFEEAIPK[.S	2	1	800.1	2.607	0.2902	1122.61	1.43245	0.76	21	(Q9Z2W0) DNPEP_MOUSE Aspartyl aminopeptidase - Mus musculus (Mouse)	Q9Z2W0
DBDB_27_01.raw	5141	R.NINENFGPNTEIHLVPILATAVQEELEK[.G	3	1	596.2	3.408	0.2394	3136.62	0.89356	0.76	4	(Q9Z2W0) DNPEP_MOUSE Aspartyl aminopeptidase - Mus musculus (Mouse)	Q9Z2W0
DBDB_27_03.raw	5264	R.NINENFGPNTEIHLVPILATAVQEELEK[.G	3	1	983.7	5.096	0.4667	3136.62	-	0.94	27	(Q9Z2W0) DNPEP_MOUSE Aspartyl aminopeptidase - Mus musculus (Mouse)	Q9Z2W0
DBDB_27_01.raw	3277	K.FLWPGFGENSR.V	2	1	454.7	2.493	0.3069	1309.63	1.12388	0.87	32	(Q9Z2V4) PPCKC_MOUSE Phosphoenolpyruvate carboxykinase, cytosolic [GTP] - Mus	Q9Z2V4	0.696797	0.253882
DBDB_27_03.raw	3274	K.FLWPGFGENSR.V	2	1	515.5	2.829	0.397	1309.63	0.8684	0.96	102	(Q9Z2V4) PPCKC_MOUSE Phosphoenolpyruvate carboxykinase, cytosolic [GTP] - Mus	Q9Z2V4
DBDB_27_02.raw	3235	K.FLWPGFGENSR[.V	2	2	374.2	2.551	0.124	1313.63	0.8102	0.92	45	(Q9Z2V4) PPCKC_MOUSE Phosphoenolpyruvate carboxykinase, cytosolic [GTP] - Mus	Q9Z2V4
DBDB_23_01.raw	4117	K.GLGGVNVEELFGISK.E	2	1	1732.5	4.596	0.5069	1518.82	0.52027	0.96	182	(Q9Z2V4) PPCKC_MOUSE Phosphoenolpyruvate carboxykinase, cytosolic [GTP] - Mus	Q9Z2V4
DBDB_23_01.raw	4249	K.GLGGVNVEELFGISK.E	2	1	1251.4	4.147	0.4579	1518.82	0.63113	0.91	28	(Q9Z2V4) PPCKC_MOUSE Phosphoenolpyruvate carboxykinase, cytosolic [GTP] - Mus	Q9Z2V4
DBDB_23_01.raw	4382	K.GLGGVNVEELFGISK.E	2	1	1894.3	4.253	0.486	1518.82	0.65898	0.96	71	(Q9Z2V4) PPCKC_MOUSE Phosphoenolpyruvate carboxykinase, cytosolic [GTP] - Mus	Q9Z2V4
DBDB_23_01.raw	4524	K.GLGGVNVEELFGISK.E	2	1	1807.9	3.835	0.4712	1518.82	0.67161	0.93	43	(Q9Z2V4) PPCKC_MOUSE Phosphoenolpyruvate carboxykinase, cytosolic [GTP] - Mus	Q9Z2V4
DBDB_23_01.raw	4666	K.GLGGVNVEELFGISK.E	2	1	1635.6	4.077	0.4869	1518.82	0.63347	0.95	43	(Q9Z2V4) PPCKC_MOUSE Phosphoenolpyruvate carboxykinase, cytosolic [GTP] - Mus	Q9Z2V4
DBDB_23_01.raw	4806	K.GLGGVNVEELFGISK.E	2	1	1617.4	3.773	0.4531	1518.82	0.71353	0.94	39	(Q9Z2V4) PPCKC_MOUSE Phosphoenolpyruvate carboxykinase, cytosolic [GTP] - Mus	Q9Z2V4
DBDB_23_01.raw	5077	K.GLGGVNVEELFGISK.E	2	1	1056.2	3.504	0.407	1518.82	0.59871	0.98	145	(Q9Z2V4) PPCKC_MOUSE Phosphoenolpyruvate carboxykinase, cytosolic [GTP] - Mus	Q9Z2V4
DBDB_23_01.raw	5213	K.GLGGVNVEELFGISK.E	2	1	1525	3.181	0.459	1518.82	0.63034	0.95	118	(Q9Z2V4) PPCKC_MOUSE Phosphoenolpyruvate carboxykinase, cytosolic [GTP] - Mus	Q9Z2V4
DBDB_23_01.raw	5350	K.GLGGVNVEELFGISK.E	2	1	1090.4	3.366	0.4259	1518.82	0.8883	0.84	6	(Q9Z2V4) PPCKC_MOUSE Phosphoenolpyruvate carboxykinase, cytosolic [GTP] - Mus	Q9Z2V4
DBDB_23_01.raw	5488	K.GLGGVNVEELFGISK.E	2	1	1241.7	3.393	0.4978	1518.82	0.82569	0.83	99	(Q9Z2V4) PPCKC_MOUSE Phosphoenolpyruvate carboxykinase, cytosolic [GTP] - Mus	Q9Z2V4
DBDB_23_01.raw	5636	K.GLGGVNVEELFGISK.E	2	1	1272.4	3.484	0.4977	1518.82	0.71761	0.83	43	(Q9Z2V4) PPCKC_MOUSE Phosphoenolpyruvate carboxykinase, cytosolic [GTP] - Mus	Q9Z2V4
DBDB_23_01.raw	5762	K.GLGGVNVEELFGISK.E	2	1	822.3	2.88	0.449	1518.82	0.82179	0.86	42	(Q9Z2V4) PPCKC_MOUSE Phosphoenolpyruvate carboxykinase, cytosolic [GTP] - Mus	Q9Z2V4
DBDB_23_01.raw	6022	K.GLGGVNVEELFGISK.E	2	1	972.4	3.178	0.4647	1518.82	0.60488	0.97	48	(Q9Z2V4) PPCKC_MOUSE Phosphoenolpyruvate carboxykinase, cytosolic [GTP] - Mus	Q9Z2V4
DBDB_23_01.raw	6145	K.GLGGVNVEELFGISK.E	2	1	1408.8	3.623	0.4588	1518.82	0.67627	0.86	44	(Q9Z2V4) PPCKC_MOUSE Phosphoenolpyruvate carboxykinase, cytosolic [GTP] - Mus	Q9Z2V4
DBDB_23_01.raw	6270	K.GLGGVNVEELFGISK.E	2	1	1389.5	3.369	0.4815	1518.82	0.62551	0.84	20	(Q9Z2V4) PPCKC_MOUSE Phosphoenolpyruvate carboxykinase, cytosolic [GTP] - Mus	Q9Z2V4
DBDB_23_01.raw	6389	K.GLGGVNVEELFGISK.E	2	1	1081.6	3.031	0.4799	1518.82	0.60898	0.93	69	(Q9Z2V4) PPCKC_MOUSE Phosphoenolpyruvate carboxykinase, cytosolic [GTP] - Mus	Q9Z2V4
DBDB_23_01.raw	6515	K.GLGGVNVEELFGISK.E	2	1	694.3	2.843	0.4921	1518.82	0.78376	0.93	20	(Q9Z2V4) PPCKC_MOUSE Phosphoenolpyruvate carboxykinase, cytosolic [GTP] - Mus	Q9Z2V4
DBDB_23_01.raw	6641	K.GLGGVNVEELFGISK.E	2	1	1291.5	3.289	0.454	1518.82	0.75135	0.98	168	(Q9Z2V4) PPCKC_MOUSE Phosphoenolpyruvate carboxykinase, cytosolic [GTP] - Mus	Q9Z2V4
DBDB_23_01.raw	6767	K.GLGGVNVEELFGISK.E	2	1	1266.9	2.95	0.3631	1518.82	0.69486	0.97	93	(Q9Z2V4) PPCKC_MOUSE Phosphoenolpyruvate carboxykinase, cytosolic [GTP] - Mus	Q9Z2V4
DBDB_23_01.raw	6934	K.GLGGVNVEELFGISK.E	2	2	411.5	2.582	0.3906	1518.82	0.68639	0.86	51	(Q9Z2V4) PPCKC_MOUSE Phosphoenolpyruvate carboxykinase, cytosolic [GTP] - Mus	Q9Z2V4
DBDB_23_01.raw	7159	K.GLGGVNVEELFGISK.E	2	1	528.4	2.644	0.3853	1518.82	0.69722	0.95	133	(Q9Z2V4) PPCKC_MOUSE Phosphoenolpyruvate carboxykinase, cytosolic [GTP] - Mus	Q9Z2V4
DBDB_23_01.raw	7386	K.GLGGVNVEELFGISK.E	2	1	492.3	2.927	0.3573	1518.82	0.72851	0.92	75	(Q9Z2V4) PPCKC_MOUSE Phosphoenolpyruvate carboxykinase, cytosolic [GTP] - Mus	Q9Z2V4
DBDB_23_01.raw	7625	K.GLGGVNVEELFGISK.E	2	1	679.4	2.721	0.3683	1518.82	0.75497	0.94	135	(Q9Z2V4) PPCKC_MOUSE Phosphoenolpyruvate carboxykinase, cytosolic [GTP] - Mus	Q9Z2V4
DBDB_23_01.raw	8850	K.GLGGVNVEELFGISK.E	2	1	589.8	2.606	0.3888	1518.82	0.77706	0.97	131	(Q9Z2V4) PPCKC_MOUSE Phosphoenolpyruvate carboxykinase, cytosolic [GTP] - Mus	Q9Z2V4
DBDB_23_01.raw	8952	K.GLGGVNVEELFGISK.E	2	1	619.5	3.008	0.3631	1518.82	0.7804	0.93	34	(Q9Z2V4) PPCKC_MOUSE Phosphoenolpyruvate carboxykinase, cytosolic [GTP] - Mus	Q9Z2V4
DBDB_23_01.raw	9664	K.GLGGVNVEELFGISK.E	2	1	319.1	2.418	0.2196	1518.82	2.10207	0.73	5	(Q9Z2V4) PPCKC_MOUSE Phosphoenolpyruvate carboxykinase, cytosolic [GTP] - Mus	Q9Z2V4
DBDB_23_02.raw	4018	K.GLGGVNVEELFGISK.E	2	1	1881	4.532	0.4746	1518.82	0.62936	0.89	81	(Q9Z2V4) PPCKC_MOUSE Phosphoenolpyruvate carboxykinase, cytosolic [GTP] - Mus	Q9Z2V4
DBDB_23_02.raw	4156	K.GLGGVNVEELFGISK.E	2	1	1891.8	3.994	0.4741	1518.82	0.55602	0.96	62	(Q9Z2V4) PPCKC_MOUSE Phosphoenolpyruvate carboxykinase, cytosolic [GTP] - Mus	Q9Z2V4
DBDB_23_02.raw	4289	K.GLGGVNVEELFGISK.E	2	1	1864.7	4.173	0.4633	1518.82	0.77452	0.73	17	(Q9Z2V4) PPCKC_MOUSE Phosphoenolpyruvate carboxykinase, cytosolic [GTP] - Mus	Q9Z2V4
DBDB_23_02.raw	4432	K.GLGGVNVEELFGISK.E	2	1	1872	4.062	0.456	1518.82	0.80963	0.98	242	(Q9Z2V4) PPCKC_MOUSE Phosphoenolpyruvate carboxykinase, cytosolic [GTP] - Mus	Q9Z2V4
DBDB_23_02.raw	4565	K.GLGGVNVEELFGISK.E	2	1	1528.9	3.938	0.495	1518.82	0.74659	0.88	29	(Q9Z2V4) PPCKC_MOUSE Phosphoenolpyruvate carboxykinase, cytosolic [GTP] - Mus	Q9Z2V4
DBDB_23_02.raw	4694	K.GLGGVNVEELFGISK.E	2	1	1423.7	3.812	0.4987	1518.82	0.78898	0.95	95	(Q9Z2V4) PPCKC_MOUSE Phosphoenolpyruvate carboxykinase, cytosolic [GTP] - Mus	Q9Z2V4
DBDB_23_02.raw	5085	K.GLGGVNVEELFGISK.E	2	1	577.5	2.985	0.3951	1518.82	0.65652	0.86	5	(Q9Z2V4) PPCKC_MOUSE Phosphoenolpyruvate carboxykinase, cytosolic [GTP] - Mus	Q9Z2V4
DBDB_23_02.raw	5213	K.GLGGVNVEELFGISK.E	2	1	716.3	3.049	0.4893	1518.82	0.71318	0.91	96	(Q9Z2V4) PPCKC_MOUSE Phosphoenolpyruvate carboxykinase, cytosolic [GTP] - Mus	Q9Z2V4
DBDB_23_02.raw	5507	K.GLGGVNVEELFGISK.E	2	1	1242.1	3.406	0.4868	1518.82	0.88077	0.91	22	(Q9Z2V4) PPCKC_MOUSE Phosphoenolpyruvate carboxykinase, cytosolic [GTP] - Mus	Q9Z2V4
DBDB_23_02.raw	5770	K.GLGGVNVEELFGISK.E	2	1	522.1	2.603	0.4496	1518.82	0.70945	0.91	53	(Q9Z2V4) PPCKC_MOUSE Phosphoenolpyruvate carboxykinase, cytosolic [GTP] - Mus	Q9Z2V4
DBDB_23_02.raw	5894	K.GLGGVNVEELFGISK.E	2	1	1081	2.916	0.509	1518.82	0.80621	0.98	191	(Q9Z2V4) PPCKC_MOUSE Phosphoenolpyruvate carboxykinase, cytosolic [GTP] - Mus	Q9Z2V4
DBDB_23_02.raw	6017	K.GLGGVNVEELFGISK.E	2	2	420.3	2.778	0.3988	1518.82	0.65247	0.98	1	(Q9Z2V4) PPCKC_MOUSE Phosphoenolpyruvate carboxykinase, cytosolic [GTP] - Mus	Q9Z2V4
DBDB_23_02.raw	6140	K.GLGGVNVEELFGISK.E	2	1	414.2	2.823	0.4449	1518.82	0.76383	0.92	54	(Q9Z2V4) PPCKC_MOUSE Phosphoenolpyruvate carboxykinase, cytosolic [GTP] - Mus	Q9Z2V4
DBDB_23_02.raw	6293	K.GLGGVNVEELFGISK.E	2	1	350.7	2.342	0.3577	1518.82	0.62087	0.97	89	(Q9Z2V4) PPCKC_MOUSE Phosphoenolpyruvate carboxykinase, cytosolic [GTP] - Mus	Q9Z2V4
DBDB_23_02.raw	6567	K.GLGGVNVEELFGISK.E	2	1	945.8	3.005	0.4967	1518.82	0.62909	0.73	5	(Q9Z2V4) PPCKC_MOUSE Phosphoenolpyruvate carboxykinase, cytosolic [GTP] - Mus	Q9Z2V4
DBDB_23_02.raw	6703	K.GLGGVNVEELFGISK.E	2	1	847.2	3.216	0.4555	1518.82	0.64599	0.98	126	(Q9Z2V4) PPCKC_MOUSE Phosphoenolpyruvate carboxykinase, cytosolic [GTP] - Mus	Q9Z2V4
DBDB_23_02.raw	7033	K.GLGGVNVEELFGISK.E	2	1	378.8	2.594	0.363	1518.82	0.75954	0.85	2	(Q9Z2V4) PPCKC_MOUSE Phosphoenolpyruvate carboxykinase, cytosolic [GTP] - Mus	Q9Z2V4
DBDB_23_02.raw	7532	K.GLGGVNVEELFGISK.E	2	1	642.2	2.951	0.3262	1518.82	-	0.93	30	(Q9Z2V4) PPCKC_MOUSE Phosphoenolpyruvate carboxykinase, cytosolic [GTP] - Mus	Q9Z2V4
DBDB_23_02.raw	9007	K.GLGGVNVEELFGISK.E	2	1	471.4	3.083	0.304	1518.82	-	0.89	46	(Q9Z2V4) PPCKC_MOUSE Phosphoenolpyruvate carboxykinase, cytosolic [GTP] - Mus	Q9Z2V4
DBDB_23_03.raw	3984	K.GLGGVNVEELFGISK.E	2	1	1614.7	3.927	0.5008	1518.82	0.9615	0.98	114	(Q9Z2V4) PPCKC_MOUSE Phosphoenolpyruvate carboxykinase, cytosolic [GTP] - Mus	Q9Z2V4
DBDB_23_03.raw	4119	K.GLGGVNVEELFGISK.E	3	1	1896	4.378	0.4875	1518.82	-	0.96	96	(Q9Z2V4) PPCKC_MOUSE Phosphoenolpyruvate carboxykinase, cytosolic [GTP] - Mus	Q9Z2V4
DBDB_23_03.raw	4150	K.GLGGVNVEELFGISK.E	2	1	1864.4	4.506	0.4517	1518.82	0.56862	0.96	15	(Q9Z2V4) PPCKC_MOUSE Phosphoenolpyruvate carboxykinase, cytosolic [GTP] - Mus	Q9Z2V4
DBDB_23_03.raw	4283	K.GLGGVNVEELFGISK.E	2	1	1903.3	4.821	0.5024	1518.82	0.72116	0.92	52	(Q9Z2V4) PPCKC_MOUSE Phosphoenolpyruvate carboxykinase, cytosolic [GTP] - Mus	Q9Z2V4
DBDB_23_03.raw	4420	K.GLGGVNVEELFGISK.E	2	1	1740.2	3.938	0.5333	1518.82	0.70876	0.94	109	(Q9Z2V4) PPCKC_MOUSE Phosphoenolpyruvate carboxykinase, cytosolic [GTP] - Mus	Q9Z2V4
DBDB_23_03.raw	4551	K.GLGGVNVEELFGISK.E	2	1	1648.7	3.666	0.4687	1518.82	0.73996	0.97	1	(Q9Z2V4) PPCKC_MOUSE Phosphoenolpyruvate carboxykinase, cytosolic [GTP] - Mus	Q9Z2V4
DBDB_23_03.raw	4686	K.GLGGVNVEELFGISK.E	2	1	1510.5	3.886	0.4599	1518.82	0.74259	0.83	5	(Q9Z2V4) PPCKC_MOUSE Phosphoenolpyruvate carboxykinase, cytosolic [GTP] - Mus	Q9Z2V4
DBDB_23_03.raw	4815	K.GLGGVNVEELFGISK.E	2	1	1603.3	3.363	0.4824	1518.82	0.67978	0.9	13	(Q9Z2V4) PPCKC_MOUSE Phosphoenolpyruvate carboxykinase, cytosolic [GTP] - Mus	Q9Z2V4
DBDB_23_03.raw	5214	K.GLGGVNVEELFGISK.E	2	1	964.1	2.88	0.4563	1518.82	0.67231	0.85	5	(Q9Z2V4) PPCKC_MOUSE Phosphoenolpyruvate carboxykinase, cytosolic [GTP] - Mus	Q9Z2V4
DBDB_23_03.raw	5349	K.GLGGVNVEELFGISK.E	2	1	811.6	2.899	0.4659	1518.82	0.9251	0.93	27	(Q9Z2V4) PPCKC_MOUSE Phosphoenolpyruvate carboxykinase, cytosolic [GTP] - Mus	Q9Z2V4
DBDB_23_03.raw	5473	K.GLGGVNVEELFGISK.E	2	1	1221.4	3.505	0.471	1518.82	0.7162	0.95	86	(Q9Z2V4) PPCKC_MOUSE Phosphoenolpyruvate carboxykinase, cytosolic [GTP] - Mus	Q9Z2V4
DBDB_23_03.raw	5609	K.GLGGVNVEELFGISK.E	2	1	876.1	2.959	0.4869	1518.82	0.80215	0.97	93	(Q9Z2V4) PPCKC_MOUSE Phosphoenolpyruvate carboxykinase, cytosolic [GTP] - Mus	Q9Z2V4
DBDB_23_03.raw	5735	K.GLGGVNVEELFGISK.E	2	1	1349.9	3.403	0.4721	1518.82	0.70755	0.98	177	(Q9Z2V4) PPCKC_MOUSE Phosphoenolpyruvate carboxykinase, cytosolic [GTP] - Mus	Q9Z2V4
DBDB_23_03.raw	5855	K.GLGGVNVEELFGISK.E	2	1	840.6	3.037	0.4996	1518.82	0.77003	0.93	11	(Q9Z2V4) PPCKC_MOUSE Phosphoenolpyruvate carboxykinase, cytosolic [GTP] - Mus	Q9Z2V4
DBDB_23_03.raw	5985	K.GLGGVNVEELFGISK.E	2	1	1610.2	3.64	0.4536	1518.82	0.67654	0.97	122	(Q9Z2V4) PPCKC_MOUSE Phosphoenolpyruvate carboxykinase, cytosolic [GTP] - Mus	Q9Z2V4
DBDB_23_03.raw	6107	K.GLGGVNVEELFGISK.E	2	1	1598.8	3.444	0.4499	1518.82	0.63803	0.99	269	(Q9Z2V4) PPCKC_MOUSE Phosphoenolpyruvate carboxykinase, cytosolic [GTP] - Mus	Q9Z2V4
DBDB_23_03.raw	6236	K.GLGGVNVEELFGISK.E	2	1	1308.9	3.639	0.4346	1518.82	0.70097	0.93	133	(Q9Z2V4) PPCKC_MOUSE Phosphoenolpyruvate carboxykinase, cytosolic [GTP] - Mus	Q9Z2V4
DBDB_23_03.raw	6379	K.GLGGVNVEELFGISK.E	2	1	1206.7	3.267	0.4599	1518.82	0.75567	0.94	64	(Q9Z2V4) PPCKC_MOUSE Phosphoenolpyruvate carboxykinase, cytosolic [GTP] - Mus	Q9Z2V4
DBDB_23_03.raw	6510	K.GLGGVNVEELFGISK.E	2	1	985.2	3.104	0.4324	1518.82	0.76796	0.9	6	(Q9Z2V4) PPCKC_MOUSE Phosphoenolpyruvate carboxykinase, cytosolic [GTP] - Mus	Q9Z2V4
DBDB_23_03.raw	6631	K.GLGGVNVEELFGISK.E	2	1	1173.6	3.184	0.4639	1518.82	0.63801	0.7	43	(Q9Z2V4) PPCKC_MOUSE Phosphoenolpyruvate carboxykinase, cytosolic [GTP] - Mus	Q9Z2V4
DBDB_23_03.raw	6750	K.GLGGVNVEELFGISK.E	2	1	525	3.14	0.4602	1518.82	0.68933	0.94	63	(Q9Z2V4) PPCKC_MOUSE Phosphoenolpyruvate carboxykinase, cytosolic [GTP] - Mus	Q9Z2V4
DBDB_23_03.raw	6863	K.GLGGVNVEELFGISK.E	2	1	508.1	2.877	0.4285	1518.82	0.67556	0.95	107	(Q9Z2V4) PPCKC_MOUSE Phosphoenolpyruvate carboxykinase, cytosolic [GTP] - Mus	Q9Z2V4
DBDB_23_03.raw	7459	K.GLGGVNVEELFGISK.E	2	1	1055.9	3.239	0.4132	1518.82	0.8391	0.81	30	(Q9Z2V4) PPCKC_MOUSE Phosphoenolpyruvate carboxykinase, cytosolic [GTP] - Mus	Q9Z2V4
DBDB_23_03.raw	8761	K.GLGGVNVEELFGISK.E	2	1	483.9	2.719	0.3741	1518.82	0.71027	0.92	103	(Q9Z2V4) PPCKC_MOUSE Phosphoenolpyruvate carboxykinase, cytosolic [GTP] - Mus	Q9Z2V4
DBDB_23_03.raw	8850	K.GLGGVNVEELFGISK.E	2	1	464.6	2.894	0.3469	1518.82	0.72824	0.99	145	(Q9Z2V4) PPCKC_MOUSE Phosphoenolpyruvate carboxykinase, cytosolic [GTP] - Mus	Q9Z2V4
DBDB_23_01.raw	4035	K.GLGGVNVEELFGISK[.E	2	1	1489.7	3.782	0.3961	1522.82	0.90128	0.93	104	(Q9Z2V4) PPCKC_MOUSE Phosphoenolpyruvate carboxykinase, cytosolic [GTP] - Mus	Q9Z2V4
DBDB_23_01.raw	4165	K.GLGGVNVEELFGISK[.E	2	1	1839.7	4.831	0.4586	1522.82	0.53024	0.94	139	(Q9Z2V4) PPCKC_MOUSE Phosphoenolpyruvate carboxykinase, cytosolic [GTP] - Mus	Q9Z2V4
DBDB_23_01.raw	4314	K.GLGGVNVEELFGISK[.E	2	1	1232.3	4.166	0.4772	1522.82	0.75541	0.94	49	(Q9Z2V4) PPCKC_MOUSE Phosphoenolpyruvate carboxykinase, cytosolic [GTP] - Mus	Q9Z2V4
DBDB_23_01.raw	5929	K.GLGGVNVEELFGISK[.E	2	1	932.5	2.893	0.284	1522.82	0.82792	0.96	19	(Q9Z2V4) PPCKC_MOUSE Phosphoenolpyruvate carboxykinase, cytosolic [GTP] - Mus	Q9Z2V4
DBDB_23_01.raw	6889	K.GLGGVNVEELFGISK[.E	2	1	679.4	2.933	0.3843	1522.82	0.80104	0.98	40	(Q9Z2V4) PPCKC_MOUSE Phosphoenolpyruvate carboxykinase, cytosolic [GTP] - Mus	Q9Z2V4
DBDB_23_01.raw	7517	K.GLGGVNVEELFGISK[.E	2	1	576.1	2.201	0.1372	1522.82	0.78208	0.9	13	(Q9Z2V4) PPCKC_MOUSE Phosphoenolpyruvate carboxykinase, cytosolic [GTP] - Mus	Q9Z2V4
DBDB_23_01.raw	7751	K.GLGGVNVEELFGISK[.E	2	1	381.6	2.725	0.3246	1522.82	0.67745	0.96	162	(Q9Z2V4) PPCKC_MOUSE Phosphoenolpyruvate carboxykinase, cytosolic [GTP] - Mus	Q9Z2V4
DBDB_23_01.raw	7841	K.GLGGVNVEELFGISK[.E	2	1	549.6	2.675	0.2533	1522.82	0.7413	0.86	42	(Q9Z2V4) PPCKC_MOUSE Phosphoenolpyruvate carboxykinase, cytosolic [GTP] - Mus	Q9Z2V4
DBDB_23_02.raw	3956	K.GLGGVNVEELFGISK[.E	2	1	1496.2	3.366	0.3871	1522.82	1.01948	0.96	80	(Q9Z2V4) PPCKC_MOUSE Phosphoenolpyruvate carboxykinase, cytosolic [GTP] - Mus	Q9Z2V4
DBDB_23_02.raw	5661	K.GLGGVNVEELFGISK[.E	2	1	1057.2	2.871	0.3151	1522.82	0.81035	0.95	78	(Q9Z2V4) PPCKC_MOUSE Phosphoenolpyruvate carboxykinase, cytosolic [GTP] - Mus	Q9Z2V4
DBDB_23_02.raw	6255	K.GLGGVNVEELFGISK[.E	2	1	455.2	2.867	0.3721	1522.82	0.76809	0.81	5	(Q9Z2V4) PPCKC_MOUSE Phosphoenolpyruvate carboxykinase, cytosolic [GTP] - Mus	Q9Z2V4
DBDB_23_02.raw	6446	K.GLGGVNVEELFGISK[.E	2	1	637	2.788	0.3942	1522.82	0.69169	0.77	46	(Q9Z2V4) PPCKC_MOUSE Phosphoenolpyruvate carboxykinase, cytosolic [GTP] - Mus	Q9Z2V4
DBDB_23_02.raw	6962	K.GLGGVNVEELFGISK[.E	2	1	504.1	2.707	0.2658	1522.82	0.70687	0.9	51	(Q9Z2V4) PPCKC_MOUSE Phosphoenolpyruvate carboxykinase, cytosolic [GTP] - Mus	Q9Z2V4
DBDB_23_03.raw	4017	K.GLGGVNVEELFGISK[.E	2	1	1569.3	4.414	0.3958	1522.82	0.62295	0.9	74	(Q9Z2V4) PPCKC_MOUSE Phosphoenolpyruvate carboxykinase, cytosolic [GTP] - Mus	Q9Z2V4
DBDB_23_03.raw	4490	K.GLGGVNVEELFGISK[.E	2	1	1455	3.818	0.4346	1522.82	0.74941	0.97	114	(Q9Z2V4) PPCKC_MOUSE Phosphoenolpyruvate carboxykinase, cytosolic [GTP] - Mus	Q9Z2V4
DBDB_23_03.raw	5328	K.GLGGVNVEELFGISK[.E	2	1	1127.1	3.536	0.3315	1522.82	0.8029	0.91	12	(Q9Z2V4) PPCKC_MOUSE Phosphoenolpyruvate carboxykinase, cytosolic [GTP] - Mus	Q9Z2V4
DBDB_23_03.raw	5517	K.GLGGVNVEELFGISK[.E	2	1	1425.8	3.159	0.3997	1522.82	0.7856	0.97	42	(Q9Z2V4) PPCKC_MOUSE Phosphoenolpyruvate carboxykinase, cytosolic [GTP] - Mus	Q9Z2V4
DBDB_23_03.raw	6814	K.GLGGVNVEELFGISK[.E	2	1	812.7	2.924	0.3659	1522.82	0.607	0.62	47	(Q9Z2V4) PPCKC_MOUSE Phosphoenolpyruvate carboxykinase, cytosolic [GTP] - Mus	Q9Z2V4
DBDB_23_03.raw	6983	K.GLGGVNVEELFGISK[.E	2	2	417.7	2.646	0.3245	1522.82	0.63563	0.7	32	(Q9Z2V4) PPCKC_MOUSE Phosphoenolpyruvate carboxykinase, cytosolic [GTP] - Mus	Q9Z2V4
DBDB_23_03.raw	7132	K.GLGGVNVEELFGISK[.E	2	1	700.4	2.858	0.2946	1522.82	0.7471	0.94	107	(Q9Z2V4) PPCKC_MOUSE Phosphoenolpyruvate carboxykinase, cytosolic [GTP] - Mus	Q9Z2V4
DBDB_21_03.raw	3225	K.IGIELTDSPYVVASM*R.I	2	1	1058.2	3.588	0.4359	1766.9	-	0.9	100	(Q9Z2V4) PPCKC_MOUSE Phosphoenolpyruvate carboxykinase, cytosolic [GTP] - Mus	Q9Z2V4
DBDB_21_01.raw	6675	K.IGIELTDSPYVVASMR.I	2	1	328.2	2.563	0.3003	1750.9	-	0.97	134	(Q9Z2V4) PPCKC_MOUSE Phosphoenolpyruvate carboxykinase, cytosolic [GTP] - Mus	Q9Z2V4
DBDB_21_01.raw	6880	K.IGIELTDSPYVVASMR.I	2	1	481.2	2.417	0.1835	1750.9	-	0.74	26	(Q9Z2V4) PPCKC_MOUSE Phosphoenolpyruvate carboxykinase, cytosolic [GTP] - Mus	Q9Z2V4
DBDB_21_03.raw	5834	K.IGIELTDSPYVVASMR.I	2	1	394	2.261	0.2252	1750.9	-	0.85	13	(Q9Z2V4) PPCKC_MOUSE Phosphoenolpyruvate carboxykinase, cytosolic [GTP] - Mus	Q9Z2V4
DBDB_21_03.raw	7591	K.IGIELTDSPYVVASMR.I	2	1	357.7	2.39	0.3583	1750.9	-	0.93	105	(Q9Z2V4) PPCKC_MOUSE Phosphoenolpyruvate carboxykinase, cytosolic [GTP] - Mus	Q9Z2V4
DBDB_21_03.raw	7854	K.IGIELTDSPYVVASMR.I	2	1	318.2	2.695	0.3855	1750.9	-	0.66	28	(Q9Z2V4) PPCKC_MOUSE Phosphoenolpyruvate carboxykinase, cytosolic [GTP] - Mus	Q9Z2V4
DBDB_45_01.raw	4854	K.KPLVNNWACNPELTLIAHLPDR.R	4	1	747.8	4.593	0.4554	2571.36	-	0.89	108	(Q9Z2V4) PPCKC_MOUSE Phosphoenolpyruvate carboxykinase, cytosolic [GTP] - Mus	Q9Z2V4
DBDB_45_02.raw	4860	K.KPLVNNWACNPELTLIAHLPDR.R	4	1	776.3	4.848	0.3506	2571.36	-	0.96	1	(Q9Z2V4) PPCKC_MOUSE Phosphoenolpyruvate carboxykinase, cytosolic [GTP] - Mus	Q9Z2V4
DBDB_17_01.raw	11324	K.NTIFTNVAETSDGGVYWEGIDEPLAPGVTITSWK.N	2	1	316.5	2.72	0.4603	3667.78	0.58669	0.93	20	(Q9Z2V4) PPCKC_MOUSE Phosphoenolpyruvate carboxykinase, cytosolic [GTP] - Mus	Q9Z2V4
DBDB_17_03.raw	9056	K.NTIFTNVAETSDGGVYWEGIDEPLAPGVTITSWK.N	4	1	1391.5	4.588	0.354	3667.78	-	0.83	30	(Q9Z2V4) PPCKC_MOUSE Phosphoenolpyruvate carboxykinase, cytosolic [GTP] - Mus	Q9Z2V4
DBDB_17_01.raw	8518	K.NTIFTNVAETSDGGVYWEGIDEPLAPGVTITSWK[.N	4	1	1202.7	3.882	0.3796	3671.78	-	0.96	94	(Q9Z2V4) PPCKC_MOUSE Phosphoenolpyruvate carboxykinase, cytosolic [GTP] - Mus	Q9Z2V4
DBDB_17_03.raw	8614	K.NTIFTNVAETSDGGVYWEGIDEPLAPGVTITSWK[.N	4	1	827	3.263	0.2452	3671.78	-	0.93	48	(Q9Z2V4) PPCKC_MOUSE Phosphoenolpyruvate carboxykinase, cytosolic [GTP] - Mus	Q9Z2V4
DBDB_23_01.raw	2062	K.VECVGDDIAWM*K.F	2	1	696.1	2.685	0.2674	1438.64	2.92658	0.85	33	(Q9Z2V4) PPCKC_MOUSE Phosphoenolpyruvate carboxykinase, cytosolic [GTP] - Mus	Q9Z2V4
DBDB_23_03.raw	2012	K.VECVGDDIAWM*K.F	2	1	714.4	2.475	0.3149	1438.64	-	0.82	6	(Q9Z2V4) PPCKC_MOUSE Phosphoenolpyruvate carboxykinase, cytosolic [GTP] - Mus	Q9Z2V4
DBDB_23_01.raw	2612	K.VECVGDDIAWMK.F	2	1	1321.1	3.241	0.479	1422.65	0.74388	0.95	20	(Q9Z2V4) PPCKC_MOUSE Phosphoenolpyruvate carboxykinase, cytosolic [GTP] - Mus	Q9Z2V4
DBDB_23_02.raw	2574	K.VECVGDDIAWMK.F	2	1	1683	3.503	0.5488	1422.65	0.56717	0.99	161	(Q9Z2V4) PPCKC_MOUSE Phosphoenolpyruvate carboxykinase, cytosolic [GTP] - Mus	Q9Z2V4
DBDB_23_03.raw	2569	K.VECVGDDIAWMK.F	2	1	1797.8	3.398	0.5026	1422.65	0.71939	0.65	14	(Q9Z2V4) PPCKC_MOUSE Phosphoenolpyruvate carboxykinase, cytosolic [GTP] - Mus	Q9Z2V4
DBDB_23_02.raw	2590	K.VECVGDDIAWMK[.F	2	1	1563.1	4.16	0.4745	1426.65	0.5449	0.98	209	(Q9Z2V4) PPCKC_MOUSE Phosphoenolpyruvate carboxykinase, cytosolic [GTP] - Mus	Q9Z2V4
DBDB_23_03.raw	2288	K.VIQGSLDSLPQAVR.K	2	1	730.7	2.71	0.3022	1482.83	0.62971	0.9	20	(Q9Z2V4) PPCKC_MOUSE Phosphoenolpyruvate carboxykinase, cytosolic [GTP] - Mus	Q9Z2V4
DBDB_23_01.raw	2308	K.VIQGSLDSLPQAVR[.K	2	1	592.7	2.79	0.2979	1486.83	-	0.9	51	(Q9Z2V4) PPCKC_MOUSE Phosphoenolpyruvate carboxykinase, cytosolic [GTP] - Mus	Q9Z2V4
DBDB_23_02.raw	2221	K.VIQGSLDSLPQAVR[.K	2	1	1397.7	4.835	0.5441	1486.83	-	0.96	63	(Q9Z2V4) PPCKC_MOUSE Phosphoenolpyruvate carboxykinase, cytosolic [GTP] - Mus	Q9Z2V4
DBDB_23_03.raw	2279	K.VIQGSLDSLPQAVR[.K	2	1	1198.4	4.525	0.4688	1486.83	0.64581	0.89	79	(Q9Z2V4) PPCKC_MOUSE Phosphoenolpyruvate carboxykinase, cytosolic [GTP] - Mus	Q9Z2V4
DBDB_24_01.raw	3148	K.YDNCWLALTDPR.D	2	1	1431.6	4.004	0.3912	1523.7	0.62396	0.98	209	(Q9Z2V4) PPCKC_MOUSE Phosphoenolpyruvate carboxykinase, cytosolic [GTP] - Mus	Q9Z2V4
DBDB_24_02.raw	3190	K.YDNCWLALTDPR.D	2	1	1196.7	3.813	0.3966	1523.7	0.72525	0.8	9	(Q9Z2V4) PPCKC_MOUSE Phosphoenolpyruvate carboxykinase, cytosolic [GTP] - Mus	Q9Z2V4
DBDB_24_03.raw	3235	K.YDNCWLALTDPR.D	2	1	1064.5	3.642	0.4219	1523.7	0.56258	0.95	147	(Q9Z2V4) PPCKC_MOUSE Phosphoenolpyruvate carboxykinase, cytosolic [GTP] - Mus	Q9Z2V4
DBDB_24_01.raw	3113	K.YDNCWLALTDPR[.D	2	1	1027.4	3.462	0.2937	1527.7	0.76989	0.97	73	(Q9Z2V4) PPCKC_MOUSE Phosphoenolpyruvate carboxykinase, cytosolic [GTP] - Mus	Q9Z2V4
DBDB_20_03.raw	3099	R.AINPENGFFGVAPGTSVK.T	2	1	795.4	3.22	0.2426	1804.92	-	0.94	33	(Q9Z2V4) PPCKC_MOUSE Phosphoenolpyruvate carboxykinase, cytosolic [GTP] - Mus	Q9Z2V4
DBDB_21_01.raw	2906	R.AINPENGFFGVAPGTSVK.T	2	1	727.6	2.555	0.1363	1804.92	-	0.94	20	(Q9Z2V4) PPCKC_MOUSE Phosphoenolpyruvate carboxykinase, cytosolic [GTP] - Mus	Q9Z2V4
DBDB_21_02.raw	2867	R.AINPENGFFGVAPGTSVK.T	2	1	883.9	2.87	0.2464	1804.92	-	0.94	78	(Q9Z2V4) PPCKC_MOUSE Phosphoenolpyruvate carboxykinase, cytosolic [GTP] - Mus	Q9Z2V4
DBDB_21_03.raw	2957	R.AINPENGFFGVAPGTSVK.T	2	1	904.3	2.814	0.2165	1804.92	-	0.94	41	(Q9Z2V4) PPCKC_MOUSE Phosphoenolpyruvate carboxykinase, cytosolic [GTP] - Mus	Q9Z2V4
DBDB_22_01.raw	3042	R.AINPENGFFGVAPGTSVK.T	2	1	616.6	2.328	0.2009	1804.92	-	0.81	73	(Q9Z2V4) PPCKC_MOUSE Phosphoenolpyruvate carboxykinase, cytosolic [GTP] - Mus	Q9Z2V4
DBDB_22_02.raw	3077	R.AINPENGFFGVAPGTSVK.T	2	1	1156.3	2.95	0.3758	1804.92	-	0.91	32	(Q9Z2V4) PPCKC_MOUSE Phosphoenolpyruvate carboxykinase, cytosolic [GTP] - Mus	Q9Z2V4
DBDB_23_02.raw	2743	R.AINPENGFFGVAPGTSVK[.T	2	1	933.8	4.571	0.4965	1808.92	1.14777	0.99	147	(Q9Z2V4) PPCKC_MOUSE Phosphoenolpyruvate carboxykinase, cytosolic [GTP] - Mus	Q9Z2V4
DBDB_19_01.raw	3659	R.EIISFGSGYGGNSLLGK.K	2	1	1999.3	2.867	0.3862	1698.87	-	0.91	24	(Q9Z2V4) PPCKC_MOUSE Phosphoenolpyruvate carboxykinase, cytosolic [GTP] - Mus	Q9Z2V4
DBDB_19_02.raw	3597	R.EIISFGSGYGGNSLLGK.K	2	1	2341	2.958	0.3626	1698.87	-	0.94	67	(Q9Z2V4) PPCKC_MOUSE Phosphoenolpyruvate carboxykinase, cytosolic [GTP] - Mus	Q9Z2V4
DBDB_19_03.raw	3613	R.EIISFGSGYGGNSLLGK.K	2	1	2132.9	3.039	0.3251	1698.87	-	0.5	4	(Q9Z2V4) PPCKC_MOUSE Phosphoenolpyruvate carboxykinase, cytosolic [GTP] - Mus	Q9Z2V4
DBDB_18_01.raw	5209	R.FCTPASQCPIIDPAWESPEGVPIEGIIFGGR.R	2	1	745.3	4.716	0.5963	3400.65	0.67005	0.87	22	(Q9Z2V4) PPCKC_MOUSE Phosphoenolpyruvate carboxykinase, cytosolic [GTP] - Mus	Q9Z2V4
DBDB_18_01.raw	5693	R.FCTPASQCPIIDPAWESPEGVPIEGIIFGGR.R	3	1	324.2	3.296	0.3445	3400.65	0.60406	0.96	118	(Q9Z2V4) PPCKC_MOUSE Phosphoenolpyruvate carboxykinase, cytosolic [GTP] - Mus	Q9Z2V4
DBDB_18_01.raw	5697	R.FCTPASQCPIIDPAWESPEGVPIEGIIFGGR.R	2	1	562.9	4.463	0.5644	3400.65	0.55976	0.85	34	(Q9Z2V4) PPCKC_MOUSE Phosphoenolpyruvate carboxykinase, cytosolic [GTP] - Mus	Q9Z2V4
DBDB_18_01.raw	5567	R.FCTPASQCPIIDPAWESPEGVPIEGIIFGGR[.R	2	1	323.3	2.945	0.2494	3404.65	0.66139	0.95	20	(Q9Z2V4) PPCKC_MOUSE Phosphoenolpyruvate carboxykinase, cytosolic [GTP] - Mus	Q9Z2V4
DBDB_18_03.raw	5613	R.FCTPASQCPIIDPAWESPEGVPIEGIIFGGR[.R	2	1	324.4	2.979	0.2645	3404.65	0.69633	0.96	52	(Q9Z2V4) PPCKC_MOUSE Phosphoenolpyruvate carboxykinase, cytosolic [GTP] - Mus	Q9Z2V4
DBDB_22_01.raw	4219	R.M*GISVLEALGDGEFIK.C	2	1	2176.4	4.526	0.4908	1694.87	0.67174	0.77	16	(Q9Z2V4) PPCKC_MOUSE Phosphoenolpyruvate carboxykinase, cytosolic [GTP] - Mus	Q9Z2V4
DBDB_23_02.raw	4193	R.M*GISVLEALGDGEFIK.C	2	1	897.1	3.831	0.4306	1694.87	0.55423	0.98	86	(Q9Z2V4) PPCKC_MOUSE Phosphoenolpyruvate carboxykinase, cytosolic [GTP] - Mus	Q9Z2V4
DBDB_23_03.raw	4206	R.M*GISVLEALGDGEFIK.C	2	1	2292.4	4.181	0.5362	1694.87	0.58023	0.85	9	(Q9Z2V4) PPCKC_MOUSE Phosphoenolpyruvate carboxykinase, cytosolic [GTP] - Mus	Q9Z2V4
DBDB_23_03.raw	4339	R.M*GISVLEALGDGEFIK.C	2	1	886.2	3.703	0.4626	1694.87	0.58825	0.62	27	(Q9Z2V4) PPCKC_MOUSE Phosphoenolpyruvate carboxykinase, cytosolic [GTP] - Mus	Q9Z2V4
DBDB_22_02.raw	4235	R.M*GISVLEALGDGEFIK[.C	2	1	714.4	3.652	0.2718	1698.87	0.6789	0.89	34	(Q9Z2V4) PPCKC_MOUSE Phosphoenolpyruvate carboxykinase, cytosolic [GTP] - Mus	Q9Z2V4
DBDB_22_03.raw	4161	R.M*GISVLEALGDGEFIK[.C	2	1	1207.5	4.295	0.4899	1698.87	0.66029	0.82	40	(Q9Z2V4) PPCKC_MOUSE Phosphoenolpyruvate carboxykinase, cytosolic [GTP] - Mus	Q9Z2V4
DBDB_23_02.raw	4202	R.M*GISVLEALGDGEFIK[.C	2	1	1765.2	4.72	0.5092	1698.87	0.55043	0.95	134	(Q9Z2V4) PPCKC_MOUSE Phosphoenolpyruvate carboxykinase, cytosolic [GTP] - Mus	Q9Z2V4
DBDB_23_03.raw	4432	R.M*GISVLEALGDGEFIK[.C	2	1	1145.4	3.431	0.3673	1698.87	-	0.96	164	(Q9Z2V4) PPCKC_MOUSE Phosphoenolpyruvate carboxykinase, cytosolic [GTP] - Mus	Q9Z2V4
DBDB_23_01.raw	4571	R.MGISVLEALGDGEFIK.C	2	1	1245.3	3.162	0.473	1678.87	0.47916	0.94	5	(Q9Z2V4) PPCKC_MOUSE Phosphoenolpyruvate carboxykinase, cytosolic [GTP] - Mus	Q9Z2V4
DBDB_23_01.raw	4655	R.MGISVLEALGDGEFIK.C	2	1	2180.3	5.299	0.5019	1678.87	-	0.88	63	(Q9Z2V4) PPCKC_MOUSE Phosphoenolpyruvate carboxykinase, cytosolic [GTP] - Mus	Q9Z2V4
DBDB_23_01.raw	4967	R.MGISVLEALGDGEFIK.C	2	1	908.7	3.397	0.4023	1678.87	0.48817	0.83	134	(Q9Z2V4) PPCKC_MOUSE Phosphoenolpyruvate carboxykinase, cytosolic [GTP] - Mus	Q9Z2V4
DBDB_23_01.raw	5882	R.MGISVLEALGDGEFIK.C	2	1	465	2.915	0.2599	1678.87	0.50615	0.7	6	(Q9Z2V4) PPCKC_MOUSE Phosphoenolpyruvate carboxykinase, cytosolic [GTP] - Mus	Q9Z2V4
DBDB_23_01.raw	6051	R.MGISVLEALGDGEFIK.C	2	1	576.3	2.474	0.2458	1678.87	-	0.79	26	(Q9Z2V4) PPCKC_MOUSE Phosphoenolpyruvate carboxykinase, cytosolic [GTP] - Mus	Q9Z2V4
DBDB_23_01.raw	6452	R.MGISVLEALGDGEFIK.C	2	1	448.9	2.815	0.3124	1678.87	0.51938	0.82	19	(Q9Z2V4) PPCKC_MOUSE Phosphoenolpyruvate carboxykinase, cytosolic [GTP] - Mus	Q9Z2V4
DBDB_23_01.raw	6580	R.MGISVLEALGDGEFIK.C	2	1	456	2.219	0.2487	1678.87	0.71425	0.89	42	(Q9Z2V4) PPCKC_MOUSE Phosphoenolpyruvate carboxykinase, cytosolic [GTP] - Mus	Q9Z2V4
DBDB_23_01.raw	6817	R.MGISVLEALGDGEFIK.C	2	1	694.7	3.243	0.3681	1678.87	0.58543	0.87	38	(Q9Z2V4) PPCKC_MOUSE Phosphoenolpyruvate carboxykinase, cytosolic [GTP] - Mus	Q9Z2V4
DBDB_23_01.raw	6932	R.MGISVLEALGDGEFIK.C	2	1	481.4	3.179	0.3185	1678.87	0.46213	0.63	7	(Q9Z2V4) PPCKC_MOUSE Phosphoenolpyruvate carboxykinase, cytosolic [GTP] - Mus	Q9Z2V4
DBDB_23_01.raw	7049	R.MGISVLEALGDGEFIK.C	2	1	477.8	3.061	0.3734	1678.87	0.61305	0.79	20	(Q9Z2V4) PPCKC_MOUSE Phosphoenolpyruvate carboxykinase, cytosolic [GTP] - Mus	Q9Z2V4
DBDB_23_01.raw	7177	R.MGISVLEALGDGEFIK.C	2	1	345	2.204	0.2903	1678.87	0.52566	0.92	1	(Q9Z2V4) PPCKC_MOUSE Phosphoenolpyruvate carboxykinase, cytosolic [GTP] - Mus	Q9Z2V4
DBDB_23_01.raw	7291	R.MGISVLEALGDGEFIK.C	2	1	409.4	3.145	0.3425	1678.87	0.5242	0.83	37	(Q9Z2V4) PPCKC_MOUSE Phosphoenolpyruvate carboxykinase, cytosolic [GTP] - Mus	Q9Z2V4
DBDB_23_01.raw	7399	R.MGISVLEALGDGEFIK.C	2	1	382.8	3.147	0.3794	1678.87	0.51498	0.92	25	(Q9Z2V4) PPCKC_MOUSE Phosphoenolpyruvate carboxykinase, cytosolic [GTP] - Mus	Q9Z2V4
DBDB_23_01.raw	7538	R.MGISVLEALGDGEFIK.C	2	1	341.6	2.891	0.3915	1678.87	0.46327	0.97	1	(Q9Z2V4) PPCKC_MOUSE Phosphoenolpyruvate carboxykinase, cytosolic [GTP] - Mus	Q9Z2V4
DBDB_23_01.raw	7643	R.MGISVLEALGDGEFIK.C	2	1	586.6	3.109	0.4472	1678.87	-	0.95	85	(Q9Z2V4) PPCKC_MOUSE Phosphoenolpyruvate carboxykinase, cytosolic [GTP] - Mus	Q9Z2V4
DBDB_23_01.raw	9081	R.MGISVLEALGDGEFIK.C	2	1	408	2.681	0.3308	1678.87	-	0.97	6	(Q9Z2V4) PPCKC_MOUSE Phosphoenolpyruvate carboxykinase, cytosolic [GTP] - Mus	Q9Z2V4
DBDB_23_02.raw	4444	R.MGISVLEALGDGEFIK.C	2	1	780.6	3.17	0.3809	1678.87	0.66806	0.79	16	(Q9Z2V4) PPCKC_MOUSE Phosphoenolpyruvate carboxykinase, cytosolic [GTP] - Mus	Q9Z2V4
DBDB_23_02.raw	4575	R.MGISVLEALGDGEFIK.C	2	1	1750.8	5.141	0.5726	1678.87	0.45558	0.97	115	(Q9Z2V4) PPCKC_MOUSE Phosphoenolpyruvate carboxykinase, cytosolic [GTP] - Mus	Q9Z2V4
DBDB_23_02.raw	4708	R.MGISVLEALGDGEFIK.C	2	1	1686.1	3.799	0.527	1678.87	0.46132	0.93	121	(Q9Z2V4) PPCKC_MOUSE Phosphoenolpyruvate carboxykinase, cytosolic [GTP] - Mus	Q9Z2V4
DBDB_23_02.raw	4841	R.MGISVLEALGDGEFIK.C	2	1	674.2	2.724	0.2773	1678.87	0.48117	0.72	38	(Q9Z2V4) PPCKC_MOUSE Phosphoenolpyruvate carboxykinase, cytosolic [GTP] - Mus	Q9Z2V4
DBDB_23_02.raw	4967	R.MGISVLEALGDGEFIK.C	2	1	396.8	2.174	0.1529	1678.87	0.6953	0.94	8	(Q9Z2V4) PPCKC_MOUSE Phosphoenolpyruvate carboxykinase, cytosolic [GTP] - Mus	Q9Z2V4
DBDB_23_02.raw	5699	R.MGISVLEALGDGEFIK.C	2	1	329	2.377	0.1298	1678.87	0.52991	0.89	34	(Q9Z2V4) PPCKC_MOUSE Phosphoenolpyruvate carboxykinase, cytosolic [GTP] - Mus	Q9Z2V4
DBDB_23_02.raw	5834	R.MGISVLEALGDGEFIK.C	2	1	466.7	2.743	0.33	1678.87	0.5277	0.78	38	(Q9Z2V4) PPCKC_MOUSE Phosphoenolpyruvate carboxykinase, cytosolic [GTP] - Mus	Q9Z2V4
DBDB_23_02.raw	6113	R.MGISVLEALGDGEFIK.C	2	1	732.7	2.434	0.4063	1678.87	-	0.4	7	(Q9Z2V4) PPCKC_MOUSE Phosphoenolpyruvate carboxykinase, cytosolic [GTP] - Mus	Q9Z2V4
DBDB_23_02.raw	6616	R.MGISVLEALGDGEFIK.C	2	1	412.6	2.673	0.3833	1678.87	0.64594	0.69	39	(Q9Z2V4) PPCKC_MOUSE Phosphoenolpyruvate carboxykinase, cytosolic [GTP] - Mus	Q9Z2V4
DBDB_23_02.raw	6745	R.MGISVLEALGDGEFIK.C	2	1	397.2	3.007	0.3743	1678.87	0.48661	0.91	97	(Q9Z2V4) PPCKC_MOUSE Phosphoenolpyruvate carboxykinase, cytosolic [GTP] - Mus	Q9Z2V4
DBDB_23_02.raw	6862	R.MGISVLEALGDGEFIK.C	2	1	314.8	2.608	0.2343	1678.87	0.48569	0.86	42	(Q9Z2V4) PPCKC_MOUSE Phosphoenolpyruvate carboxykinase, cytosolic [GTP] - Mus	Q9Z2V4
DBDB_23_03.raw	4462	R.MGISVLEALGDGEFIK.C	2	1	776.1	3.168	0.3641	1678.87	-	0.95	113	(Q9Z2V4) PPCKC_MOUSE Phosphoenolpyruvate carboxykinase, cytosolic [GTP] - Mus	Q9Z2V4
DBDB_23_03.raw	4591	R.MGISVLEALGDGEFIK.C	2	1	2049.3	5.444	0.5251	1678.87	0.48826	0.96	98	(Q9Z2V4) PPCKC_MOUSE Phosphoenolpyruvate carboxykinase, cytosolic [GTP] - Mus	Q9Z2V4
DBDB_23_03.raw	4724	R.MGISVLEALGDGEFIK.C	2	1	1955.9	4.524	0.5256	1678.87	0.52812	0.94	75	(Q9Z2V4) PPCKC_MOUSE Phosphoenolpyruvate carboxykinase, cytosolic [GTP] - Mus	Q9Z2V4
DBDB_23_03.raw	4859	R.MGISVLEALGDGEFIK.C	2	1	1388.5	3.866	0.4519	1678.87	0.62884	0.7	20	(Q9Z2V4) PPCKC_MOUSE Phosphoenolpyruvate carboxykinase, cytosolic [GTP] - Mus	Q9Z2V4
DBDB_23_03.raw	4987	R.MGISVLEALGDGEFIK.C	2	1	509.3	2.256	0.213	1678.87	0.79177	0.91	116	(Q9Z2V4) PPCKC_MOUSE Phosphoenolpyruvate carboxykinase, cytosolic [GTP] - Mus	Q9Z2V4
DBDB_23_03.raw	5385	R.MGISVLEALGDGEFIK.C	2	1	535.1	2.527	0.2602	1678.87	-	0.95	96	(Q9Z2V4) PPCKC_MOUSE Phosphoenolpyruvate carboxykinase, cytosolic [GTP] - Mus	Q9Z2V4
DBDB_23_03.raw	5786	R.MGISVLEALGDGEFIK.C	2	1	398.4	2.354	0.2586	1678.87	0.47109	0.98	1	(Q9Z2V4) PPCKC_MOUSE Phosphoenolpyruvate carboxykinase, cytosolic [GTP] - Mus	Q9Z2V4
DBDB_23_03.raw	5909	R.MGISVLEALGDGEFIK.C	2	1	396.4	2.497	0.2425	1678.87	0.53783	0.97	2	(Q9Z2V4) PPCKC_MOUSE Phosphoenolpyruvate carboxykinase, cytosolic [GTP] - Mus	Q9Z2V4
DBDB_23_01.raw	4512	R.MGISVLEALGDGEFIK[.C	2	1	1493.7	4.076	0.3617	1682.87	0.58484	0.95	108	(Q9Z2V4) PPCKC_MOUSE Phosphoenolpyruvate carboxykinase, cytosolic [GTP] - Mus	Q9Z2V4
DBDB_23_01.raw	4813	R.MGISVLEALGDGEFIK[.C	2	1	1588.6	4.313	0.4442	1682.87	0.46801	0.83	9	(Q9Z2V4) PPCKC_MOUSE Phosphoenolpyruvate carboxykinase, cytosolic [GTP] - Mus	Q9Z2V4
DBDB_23_01.raw	5095	R.MGISVLEALGDGEFIK[.C	2	1	1047.3	3.32	0.296	1682.87	0.57986	0.92	27	(Q9Z2V4) PPCKC_MOUSE Phosphoenolpyruvate carboxykinase, cytosolic [GTP] - Mus	Q9Z2V4
DBDB_23_01.raw	5255	R.MGISVLEALGDGEFIK[.C	2	1	782.7	2.481	0.1461	1682.87	-	0.96	196	(Q9Z2V4) PPCKC_MOUSE Phosphoenolpyruvate carboxykinase, cytosolic [GTP] - Mus	Q9Z2V4
DBDB_23_01.raw	5399	R.MGISVLEALGDGEFIK[.C	2	1	811.3	3.015	0.2496	1682.87	-	0.93	42	(Q9Z2V4) PPCKC_MOUSE Phosphoenolpyruvate carboxykinase, cytosolic [GTP] - Mus	Q9Z2V4
DBDB_23_01.raw	5562	R.MGISVLEALGDGEFIK[.C	2	1	934.1	3.094	0.3006	1682.87	0.5955	0.88	43	(Q9Z2V4) PPCKC_MOUSE Phosphoenolpyruvate carboxykinase, cytosolic [GTP] - Mus	Q9Z2V4
DBDB_23_01.raw	6007	R.MGISVLEALGDGEFIK[.C	2	1	969.8	2.995	0.1491	1682.87	0.49297	0.91	92	(Q9Z2V4) PPCKC_MOUSE Phosphoenolpyruvate carboxykinase, cytosolic [GTP] - Mus	Q9Z2V4
DBDB_23_01.raw	6699	R.MGISVLEALGDGEFIK[.C	2	1	711.7	2.96	0.3228	1682.87	-	0.94	122	(Q9Z2V4) PPCKC_MOUSE Phosphoenolpyruvate carboxykinase, cytosolic [GTP] - Mus	Q9Z2V4
DBDB_23_02.raw	4554	R.MGISVLEALGDGEFIK[.C	2	1	1966.2	5.361	0.4587	1682.87	0.50606	0.96	62	(Q9Z2V4) PPCKC_MOUSE Phosphoenolpyruvate carboxykinase, cytosolic [GTP] - Mus	Q9Z2V4
DBDB_23_02.raw	4724	R.MGISVLEALGDGEFIK[.C	2	1	979.3	4.042	0.359	1682.87	0.49243	0.83	14	(Q9Z2V4) PPCKC_MOUSE Phosphoenolpyruvate carboxykinase, cytosolic [GTP] - Mus	Q9Z2V4
DBDB_23_02.raw	5055	R.MGISVLEALGDGEFIK[.C	2	1	781.6	2.871	0.1589	1682.87	-	0.7	26	(Q9Z2V4) PPCKC_MOUSE Phosphoenolpyruvate carboxykinase, cytosolic [GTP] - Mus	Q9Z2V4
DBDB_26_01.raw	2091	R.WMSEEDFEK.A	2	1	431	2.759	0.2853	1200.49	0.69372	0.97	179	(Q9Z2V4) PPCKC_MOUSE Phosphoenolpyruvate carboxykinase, cytosolic [GTP] - Mus	Q9Z2V4
DBDB_19_01.raw	3404	R.YLEDQVNTDLPYEIER.E	2	1	1291.7	3.541	0.3471	1996.95	-	0.97	79	(Q9Z2V4) PPCKC_MOUSE Phosphoenolpyruvate carboxykinase, cytosolic [GTP] - Mus	Q9Z2V4
DBDB_20_01.raw	2800	R.YLEDQVNTDLPYEIER.E	2	1	1409.1	5.039	0.515	1996.95	-	0.97	80	(Q9Z2V4) PPCKC_MOUSE Phosphoenolpyruvate carboxykinase, cytosolic [GTP] - Mus	Q9Z2V4
DBDB_20_02.raw	3050	R.YLEDQVNTDLPYEIER.E	2	1	1046.3	4.358	0.5199	1996.95	-	0.83	55	(Q9Z2V4) PPCKC_MOUSE Phosphoenolpyruvate carboxykinase, cytosolic [GTP] - Mus	Q9Z2V4
DBDB_20_03.raw	3157	R.YLEDQVNTDLPYEIER.E	2	1	1359.3	5.567	0.4833	1996.95	0.24362	0.92	20	(Q9Z2V4) PPCKC_MOUSE Phosphoenolpyruvate carboxykinase, cytosolic [GTP] - Mus	Q9Z2V4
DBDB_21_01.raw	3181	R.YLEDQVNTDLPYEIER.E	2	1	1453	5.465	0.5426	1996.95	-	0.89	100	(Q9Z2V4) PPCKC_MOUSE Phosphoenolpyruvate carboxykinase, cytosolic [GTP] - Mus	Q9Z2V4
DBDB_21_01.raw	3321	R.YLEDQVNTDLPYEIER.E	2	1	798.1	3.746	0.2022	1996.95	1.16751	0.87	19	(Q9Z2V4) PPCKC_MOUSE Phosphoenolpyruvate carboxykinase, cytosolic [GTP] - Mus	Q9Z2V4
DBDB_21_02.raw	3155	R.YLEDQVNTDLPYEIER.E	2	1	1749	5.819	0.5545	1996.95	0.50565	0.94	48	(Q9Z2V4) PPCKC_MOUSE Phosphoenolpyruvate carboxykinase, cytosolic [GTP] - Mus	Q9Z2V4
DBDB_21_03.raw	3232	R.YLEDQVNTDLPYEIER.E	2	1	1335.6	5.343	0.4658	1996.95	-	0.97	57	(Q9Z2V4) PPCKC_MOUSE Phosphoenolpyruvate carboxykinase, cytosolic [GTP] - Mus	Q9Z2V4
DBDB_20_01.raw	2281	K.NYTDDAIETDDLTIK[.L	2	1	1966.3	5.475	0.4868	1730.8	1.09292	0.86	62	(Q9Z2U0) PSA7_MOUSE Proteasome subunit alpha type-7 - Mus musculus (Mouse)	Q9Z2U0	1.09292	NA
DBDB_21_01.raw	4315	K.ASQELIPIEDFITPVR.F	2	1	350.1	2.879	0.3366	1827.99	1.27514	0.87	42	(Q9Z2Q5) RM40_MOUSE 39S ribosomal protein L40, mitochondrial precursor - Mus m	Q9Z2Q5	1.17512	0.0965025
DBDB_21_03.raw	4423	K.ASQELIPIEDFITPVR.F	2	2	310.7	2.542	0.1259	1827.99	1.08257	0.93	46	(Q9Z2Q5) RM40_MOUSE 39S ribosomal protein L40, mitochondrial precursor - Mus m	Q9Z2Q5
DBDB_21_03.raw	4407	K.ASQELIPIEDFITPVR[.F	2	1	619.8	3.656	0.1414	1831.99	1.16764	0.97	3	(Q9Z2Q5) RM40_MOUSE 39S ribosomal protein L40, mitochondrial precursor - Mus m	Q9Z2Q5
DBDB_21_03.raw	1615	K.LQEQLGNDVVEK.Y	2	1	1431.4	2.968	0.1404	1371.71	-	0.98	289	(Q9Z2M7) PMM2_MOUSE Phosphomannomutase 2 - Mus musculus (Mouse)	Q9Z2M7	NA	NA
DBDB_19_01.raw	2676	K.TQNQPPVLEDTPDNIETGSVCTK.V	2	1	1881.3	6.531	0.5143	2543.2	1.3512	0.92	5	(Q9Z2J0) S23A1_MOUSE Solute carrier family 23 member 1 - Mus musculus (Mouse)	Q9Z2J0	1.17904	0.159523
DBDB_19_02.raw	2635	K.TQNQPPVLEDTPDNIETGSVCTK.V	2	1	1766.3	6.325	0.5571	2543.2	1.14969	0.59	50	(Q9Z2J0) S23A1_MOUSE Solute carrier family 23 member 1 - Mus musculus (Mouse)	Q9Z2J0
DBDB_19_03.raw	2667	K.TQNQPPVLEDTPDNIETGSVCTK.V	2	1	1724.8	6.272	0.5545	2543.2	1.03623	0.72	9	(Q9Z2J0) S23A1_MOUSE Solute carrier family 23 member 1 - Mus musculus (Mouse)	Q9Z2J0
DBDB_33_03.raw	8878	K.AFVVLAPEFLSHDR.D	3	1	419.7	3.167	0.2718	1600.85	-	0.98	199	(Q9Z2I9) SUCB1_MOUSE Succinyl-CoA ligase [ADP-forming] beta-chain, mitochondri	Q9Z2I9	1.03565	0.158735
DBDB_22_01.raw	3387	K.IFDLQDWSQEDER.D	2	1	1987.1	4.363	0.3484	1680.75	1.04631	0.96	133	(Q9Z2I9) SUCB1_MOUSE Succinyl-CoA ligase [ADP-forming] beta-chain, mitochondri	Q9Z2I9
DBDB_22_03.raw	3360	K.IFDLQDWSQEDER.D	2	2	1848.5	4.269	0.3277	1680.75	1.0408	0.95	16	(Q9Z2I9) SUCB1_MOUSE Succinyl-CoA ligase [ADP-forming] beta-chain, mitochondri	Q9Z2I9
DBDB_22_01.raw	3415	K.IFDLQDWSQEDER[.D	2	1	2034.3	4.317	0.3678	1684.75	1.04529	0.61	5	(Q9Z2I9) SUCB1_MOUSE Succinyl-CoA ligase [ADP-forming] beta-chain, mitochondri	Q9Z2I9
DBDB_22_02.raw	3461	K.IFDLQDWSQEDER[.D	2	1	2175.2	4.222	0.3392	1684.75	1.12912	0.92	126	(Q9Z2I9) SUCB1_MOUSE Succinyl-CoA ligase [ADP-forming] beta-chain, mitochondri	Q9Z2I9
DBDB_27_03.raw	1465	K.INFDSNSAYR.Q	2	1	951.5	2.641	0.2793	1186.55	1.13084	0.94	98	(Q9Z2I9) SUCB1_MOUSE Succinyl-CoA ligase [ADP-forming] beta-chain, mitochondri	Q9Z2I9
DBDB_27_03.raw	1472	K.INFDSNSAYR[.Q	2	1	915.7	3.684	0.3287	1190.55	1.01568	0.98	140	(Q9Z2I9) SUCB1_MOUSE Succinyl-CoA ligase [ADP-forming] beta-chain, mitochondri	Q9Z2I9
DBDB_33_01.raw	7077	K.LHGGTPANFLDVGGGATVQQVTEAFK.L	3	1	772.4	3.425	0.2466	2614.33	0.92898	0.91	50	(Q9Z2I9) SUCB1_MOUSE Succinyl-CoA ligase [ADP-forming] beta-chain, mitochondri	Q9Z2I9
DBDB_33_01.raw	7320	K.LHGGTPANFLDVGGGATVQQVTEAFK.L	3	1	475.5	3.348	0.3453	2614.33	1.15091	0.97	128	(Q9Z2I9) SUCB1_MOUSE Succinyl-CoA ligase [ADP-forming] beta-chain, mitochondri	Q9Z2I9
DBDB_33_01.raw	7780	K.LHGGTPANFLDVGGGATVQQVTEAFK.L	3	1	797.1	3.715	0.2893	2614.33	1.0455	0.91	36	(Q9Z2I9) SUCB1_MOUSE Succinyl-CoA ligase [ADP-forming] beta-chain, mitochondri	Q9Z2I9
DBDB_33_01.raw	8129	K.LHGGTPANFLDVGGGATVQQVTEAFK.L	3	1	614.7	3.21	0.1697	2614.33	0.95862	0.91	32	(Q9Z2I9) SUCB1_MOUSE Succinyl-CoA ligase [ADP-forming] beta-chain, mitochondri	Q9Z2I9
DBDB_33_01.raw	8351	K.LHGGTPANFLDVGGGATVQQVTEAFK.L	3	1	542.3	3.546	0.3134	2614.33	1.1365	0.92	37	(Q9Z2I9) SUCB1_MOUSE Succinyl-CoA ligase [ADP-forming] beta-chain, mitochondri	Q9Z2I9
DBDB_33_02.raw	11418	K.LHGGTPANFLDVGGGATVQQVTEAFK.L	3	1	1531.1	4.587	0.5451	2614.33	1.19194	0.84	31	(Q9Z2I9) SUCB1_MOUSE Succinyl-CoA ligase [ADP-forming] beta-chain, mitochondri	Q9Z2I9
DBDB_33_02.raw	6618	K.LHGGTPANFLDVGGGATVQQVTEAFK.L	3	1	804.8	3.369	0.2744	2614.33	1.22539	0.91	12	(Q9Z2I9) SUCB1_MOUSE Succinyl-CoA ligase [ADP-forming] beta-chain, mitochondri	Q9Z2I9
DBDB_33_02.raw	6870	K.LHGGTPANFLDVGGGATVQQVTEAFK.L	3	1	724.2	3.505	0.2841	2614.33	1.01685	0.85	93	(Q9Z2I9) SUCB1_MOUSE Succinyl-CoA ligase [ADP-forming] beta-chain, mitochondri	Q9Z2I9
DBDB_33_02.raw	7701	K.LHGGTPANFLDVGGGATVQQVTEAFK.L	3	1	938.9	3.96	0.3553	2614.33	1.08679	0.96	59	(Q9Z2I9) SUCB1_MOUSE Succinyl-CoA ligase [ADP-forming] beta-chain, mitochondri	Q9Z2I9
DBDB_33_02.raw	8021	K.LHGGTPANFLDVGGGATVQQVTEAFK.L	3	1	480.8	3.305	0.3356	2614.33	1.13586	0.92	40	(Q9Z2I9) SUCB1_MOUSE Succinyl-CoA ligase [ADP-forming] beta-chain, mitochondri	Q9Z2I9
DBDB_33_02.raw	8337	K.LHGGTPANFLDVGGGATVQQVTEAFK.L	3	1	1130	3.061	0.3007	2614.33	1.12401	0.95	65	(Q9Z2I9) SUCB1_MOUSE Succinyl-CoA ligase [ADP-forming] beta-chain, mitochondri	Q9Z2I9
DBDB_33_02.raw	9038	K.LHGGTPANFLDVGGGATVQQVTEAFK.L	3	1	1048.5	5.02	0.4507	2614.33	1.05756	0.85	41	(Q9Z2I9) SUCB1_MOUSE Succinyl-CoA ligase [ADP-forming] beta-chain, mitochondri	Q9Z2I9
DBDB_33_02.raw	9136	K.LHGGTPANFLDVGGGATVQQVTEAFK.L	3	1	867.8	3.793	0.3389	2614.33	1.04548	0.92	14	(Q9Z2I9) SUCB1_MOUSE Succinyl-CoA ligase [ADP-forming] beta-chain, mitochondri	Q9Z2I9
DBDB_33_03.raw	4166	K.LHGGTPANFLDVGGGATVQQVTEAFK.L	3	1	2149.7	5.965	0.5876	2614.33	0.8883	0.75	44	(Q9Z2I9) SUCB1_MOUSE Succinyl-CoA ligase [ADP-forming] beta-chain, mitochondri	Q9Z2I9
DBDB_33_03.raw	5913	K.LHGGTPANFLDVGGGATVQQVTEAFK.L	3	1	447.8	3.376	0.3243	2614.33	1.01915	0.96	71	(Q9Z2I9) SUCB1_MOUSE Succinyl-CoA ligase [ADP-forming] beta-chain, mitochondri	Q9Z2I9
DBDB_33_03.raw	6777	K.LHGGTPANFLDVGGGATVQQVTEAFK.L	3	1	713.1	4.372	0.3166	2614.33	1.2484	0.82	3	(Q9Z2I9) SUCB1_MOUSE Succinyl-CoA ligase [ADP-forming] beta-chain, mitochondri	Q9Z2I9
DBDB_33_03.raw	7928	K.LHGGTPANFLDVGGGATVQQVTEAFK.L	3	1	711.4	3.99	0.3237	2614.33	1.03395	0.97	97	(Q9Z2I9) SUCB1_MOUSE Succinyl-CoA ligase [ADP-forming] beta-chain, mitochondri	Q9Z2I9
DBDB_33_03.raw	8148	K.LHGGTPANFLDVGGGATVQQVTEAFK.L	3	1	882.7	3.728	0.3622	2614.33	1.19574	0.93	105	(Q9Z2I9) SUCB1_MOUSE Succinyl-CoA ligase [ADP-forming] beta-chain, mitochondri	Q9Z2I9
DBDB_33_01.raw	4812	K.LHGGTPANFLDVGGGATVQQVTEAFK[.L	3	1	360.9	3.336	0.2657	2618.33	-	0.97	128	(Q9Z2I9) SUCB1_MOUSE Succinyl-CoA ligase [ADP-forming] beta-chain, mitochondri	Q9Z2I9
DBDB_33_01.raw	6806	K.LHGGTPANFLDVGGGATVQQVTEAFK[.L	3	1	496.9	3.3	0.217	2618.33	1.10683	0.72	25	(Q9Z2I9) SUCB1_MOUSE Succinyl-CoA ligase [ADP-forming] beta-chain, mitochondri	Q9Z2I9
DBDB_33_01.raw	7205	K.LHGGTPANFLDVGGGATVQQVTEAFK[.L	3	1	648.6	4.1289	0.317	2618.33	1.15836	0.93	91	(Q9Z2I9) SUCB1_MOUSE Succinyl-CoA ligase [ADP-forming] beta-chain, mitochondri	Q9Z2I9
DBDB_33_01.raw	7437	K.LHGGTPANFLDVGGGATVQQVTEAFK[.L	3	1	674.8	3.995	0.3073	2618.33	1.05079	0.97	57	(Q9Z2I9) SUCB1_MOUSE Succinyl-CoA ligase [ADP-forming] beta-chain, mitochondri	Q9Z2I9
DBDB_33_01.raw	7670	K.LHGGTPANFLDVGGGATVQQVTEAFK[.L	3	1	568	3.352	0.1414	2618.33	1.04784	0.94	102	(Q9Z2I9) SUCB1_MOUSE Succinyl-CoA ligase [ADP-forming] beta-chain, mitochondri	Q9Z2I9
DBDB_33_01.raw	8666	K.LHGGTPANFLDVGGGATVQQVTEAFK[.L	3	1	663.4	3.793	0.3088	2618.33	1.08862	0.98	103	(Q9Z2I9) SUCB1_MOUSE Succinyl-CoA ligase [ADP-forming] beta-chain, mitochondri	Q9Z2I9
DBDB_33_01.raw	8974	K.LHGGTPANFLDVGGGATVQQVTEAFK[.L	3	1	1404.6	4.378	0.4722	2618.33	1.04485	0.98	124	(Q9Z2I9) SUCB1_MOUSE Succinyl-CoA ligase [ADP-forming] beta-chain, mitochondri	Q9Z2I9
DBDB_33_01.raw	9071	K.LHGGTPANFLDVGGGATVQQVTEAFK[.L	3	1	875	3.531	0.1768	2618.33	0.96894	0.96	26	(Q9Z2I9) SUCB1_MOUSE Succinyl-CoA ligase [ADP-forming] beta-chain, mitochondri	Q9Z2I9
DBDB_33_01.raw	9163	K.LHGGTPANFLDVGGGATVQQVTEAFK[.L	3	1	666.9	4.05	0.2741	2618.33	1.0186	0.9	45	(Q9Z2I9) SUCB1_MOUSE Succinyl-CoA ligase [ADP-forming] beta-chain, mitochondri	Q9Z2I9
DBDB_33_02.raw	4346	K.LHGGTPANFLDVGGGATVQQVTEAFK[.L	3	1	2060.2	5.405	0.5094	2618.33	1.01931	0.98	148	(Q9Z2I9) SUCB1_MOUSE Succinyl-CoA ligase [ADP-forming] beta-chain, mitochondri	Q9Z2I9
DBDB_33_02.raw	4703	K.LHGGTPANFLDVGGGATVQQVTEAFK[.L	3	1	1180.8	4.641	0.458	2618.33	-	0.59	3	(Q9Z2I9) SUCB1_MOUSE Succinyl-CoA ligase [ADP-forming] beta-chain, mitochondri	Q9Z2I9
DBDB_33_02.raw	4956	K.LHGGTPANFLDVGGGATVQQVTEAFK[.L	3	1	585.5	3.029	0.2571	2618.33	1.49917	0.96	138	(Q9Z2I9) SUCB1_MOUSE Succinyl-CoA ligase [ADP-forming] beta-chain, mitochondri	Q9Z2I9
DBDB_33_02.raw	7256	K.LHGGTPANFLDVGGGATVQQVTEAFK[.L	3	1	861.9	3.839	0.2583	2618.33	1.15764	0.91	19	(Q9Z2I9) SUCB1_MOUSE Succinyl-CoA ligase [ADP-forming] beta-chain, mitochondri	Q9Z2I9
DBDB_33_02.raw	7379	K.LHGGTPANFLDVGGGATVQQVTEAFK[.L	3	1	961.3	5.017	0.4505	2618.33	1.06741	0.97	139	(Q9Z2I9) SUCB1_MOUSE Succinyl-CoA ligase [ADP-forming] beta-chain, mitochondri	Q9Z2I9
DBDB_33_02.raw	7795	K.LHGGTPANFLDVGGGATVQQVTEAFK[.L	3	1	907	4.603	0.3742	2618.33	1.12539	0.85	38	(Q9Z2I9) SUCB1_MOUSE Succinyl-CoA ligase [ADP-forming] beta-chain, mitochondri	Q9Z2I9
DBDB_33_02.raw	8232	K.LHGGTPANFLDVGGGATVQQVTEAFK[.L	3	1	962.9	4.379	0.4336	2618.33	0.9889	0.85	11	(Q9Z2I9) SUCB1_MOUSE Succinyl-CoA ligase [ADP-forming] beta-chain, mitochondri	Q9Z2I9
DBDB_33_02.raw	8755	K.LHGGTPANFLDVGGGATVQQVTEAFK[.L	3	1	1199.2	3.928	0.3882	2618.33	1.19825	0.88	3	(Q9Z2I9) SUCB1_MOUSE Succinyl-CoA ligase [ADP-forming] beta-chain, mitochondri	Q9Z2I9
DBDB_33_02.raw	8850	K.LHGGTPANFLDVGGGATVQQVTEAFK[.L	3	1	1055.8	4.185	0.3482	2618.33	1.13746	0.97	13	(Q9Z2I9) SUCB1_MOUSE Succinyl-CoA ligase [ADP-forming] beta-chain, mitochondri	Q9Z2I9
DBDB_33_03.raw	4300	K.LHGGTPANFLDVGGGATVQQVTEAFK[.L	3	1	2296	6.463	0.4906	2618.33	1.07743	0.98	86	(Q9Z2I9) SUCB1_MOUSE Succinyl-CoA ligase [ADP-forming] beta-chain, mitochondri	Q9Z2I9
DBDB_33_03.raw	4431	K.LHGGTPANFLDVGGGATVQQVTEAFK[.L	3	1	1080	4.244	0.4656	2618.33	1.18172	0.94	63	(Q9Z2I9) SUCB1_MOUSE Succinyl-CoA ligase [ADP-forming] beta-chain, mitochondri	Q9Z2I9
DBDB_33_03.raw	4885	K.LHGGTPANFLDVGGGATVQQVTEAFK[.L	3	1	803.6	3.055	0.2631	2618.33	-	0.73	12	(Q9Z2I9) SUCB1_MOUSE Succinyl-CoA ligase [ADP-forming] beta-chain, mitochondri	Q9Z2I9
DBDB_33_03.raw	6292	K.LHGGTPANFLDVGGGATVQQVTEAFK[.L	3	1	699.6	3.451	0.2166	2618.33	1.04912	0.95	66	(Q9Z2I9) SUCB1_MOUSE Succinyl-CoA ligase [ADP-forming] beta-chain, mitochondri	Q9Z2I9
DBDB_33_03.raw	6896	K.LHGGTPANFLDVGGGATVQQVTEAFK[.L	3	1	769.4	3.306	0.1922	2618.33	1.23705	0.97	3	(Q9Z2I9) SUCB1_MOUSE Succinyl-CoA ligase [ADP-forming] beta-chain, mitochondri	Q9Z2I9
DBDB_33_03.raw	7484	K.LHGGTPANFLDVGGGATVQQVTEAFK[.L	3	1	1048.7	3.985	0.2978	2618.33	1.25148	0.81	17	(Q9Z2I9) SUCB1_MOUSE Succinyl-CoA ligase [ADP-forming] beta-chain, mitochondri	Q9Z2I9
DBDB_33_03.raw	7588	K.LHGGTPANFLDVGGGATVQQVTEAFK[.L	3	1	888.3	4.026	0.3835	2618.33	1.03656	0.93	68	(Q9Z2I9) SUCB1_MOUSE Succinyl-CoA ligase [ADP-forming] beta-chain, mitochondri	Q9Z2I9
DBDB_33_03.raw	8039	K.LHGGTPANFLDVGGGATVQQVTEAFK[.L	3	1	1084.8	4.194	0.3703	2618.33	0.96067	0.96	80	(Q9Z2I9) SUCB1_MOUSE Succinyl-CoA ligase [ADP-forming] beta-chain, mitochondri	Q9Z2I9
DBDB_33_03.raw	8266	K.LHGGTPANFLDVGGGATVQQVTEAFK[.L	3	1	945.5	4.127	0.4351	2618.33	1.09735	0.8	38	(Q9Z2I9) SUCB1_MOUSE Succinyl-CoA ligase [ADP-forming] beta-chain, mitochondri	Q9Z2I9
DBDB_33_03.raw	8374	K.LHGGTPANFLDVGGGATVQQVTEAFK[.L	3	1	744.8	4.017	0.447	2618.33	1.10366	0.92	52	(Q9Z2I9) SUCB1_MOUSE Succinyl-CoA ligase [ADP-forming] beta-chain, mitochondri	Q9Z2I9
DBDB_33_03.raw	8479	K.LHGGTPANFLDVGGGATVQQVTEAFK[.L	3	1	733	3.791	0.2819	2618.33	1.15458	0.95	166	(Q9Z2I9) SUCB1_MOUSE Succinyl-CoA ligase [ADP-forming] beta-chain, mitochondri	Q9Z2I9
DBDB_33_03.raw	8785	K.LHGGTPANFLDVGGGATVQQVTEAFK[.L	3	1	711.1	4.149	0.4236	2618.33	1.17016	0.86	39	(Q9Z2I9) SUCB1_MOUSE Succinyl-CoA ligase [ADP-forming] beta-chain, mitochondri	Q9Z2I9
DBDB_33_03.raw	9956	K.LHGGTPANFLDVGGGATVQQVTEAFK[.L	3	1	1566	5.426	0.4519	2618.33	1.15438	0.96	133	(Q9Z2I9) SUCB1_MOUSE Succinyl-CoA ligase [ADP-forming] beta-chain, mitochondri	Q9Z2I9
DBDB_22_03.raw	2928	K.MGFPSNIVDSAAENM*IK.L	2	1	807.2	3.05	0.3398	1839.86	0.8918	0.89	99	(Q9Z2I9) SUCB1_MOUSE Succinyl-CoA ligase [ADP-forming] beta-chain, mitochondri	Q9Z2I9
DBDB_22_01.raw	3708	K.MGFPSNIVDSAAENMIK.L	2	1	1231.8	3.113	0.3769	1823.87	1.16068	0.47	39	(Q9Z2I9) SUCB1_MOUSE Succinyl-CoA ligase [ADP-forming] beta-chain, mitochondri	Q9Z2I9
DBDB_22_01.raw	3727	K.MGFPSNIVDSAAENMIK[.L	2	1	863.3	4.669	0.44	1827.87	1.21391	0.59	1	(Q9Z2I9) SUCB1_MOUSE Succinyl-CoA ligase [ADP-forming] beta-chain, mitochondri	Q9Z2I9
DBDB_22_02.raw	3729	K.MGFPSNIVDSAAENMIK[.L	2	1	1020.2	4.226	0.5004	1827.87	1.21487	0.93	133	(Q9Z2I9) SUCB1_MOUSE Succinyl-CoA ligase [ADP-forming] beta-chain, mitochondri	Q9Z2I9
DBDB_22_03.raw	3639	K.MGFPSNIVDSAAENMIK[.L	2	2	756.5	3.292	0.3022	1827.87	1.10781	0.91	19	(Q9Z2I9) SUCB1_MOUSE Succinyl-CoA ligase [ADP-forming] beta-chain, mitochondri	Q9Z2I9
DBDB_18_01.raw	2354	K.YDATM*VEINPM*VEDSDGK.V	2	1	1103.9	5.465	0.5781	2045.87	0.91479	0.98	162	(Q9Z2I9) SUCB1_MOUSE Succinyl-CoA ligase [ADP-forming] beta-chain, mitochondri	Q9Z2I9
DBDB_18_02.raw	2420	K.YDATM*VEINPM*VEDSDGK.V	3	1	631.8	3.418	0.2816	2045.87	1.00833	0.97	140	(Q9Z2I9) SUCB1_MOUSE Succinyl-CoA ligase [ADP-forming] beta-chain, mitochondri	Q9Z2I9
DBDB_18_03.raw	2327	K.YDATM*VEINPM*VEDSDGK.V	2	1	1161.9	5.736	0.6071	2045.87	1.04321	0.82	41	(Q9Z2I9) SUCB1_MOUSE Succinyl-CoA ligase [ADP-forming] beta-chain, mitochondri	Q9Z2I9
DBDB_18_02.raw	2386	K.YDATM*VEINPM*VEDSDGK[.V	2	1	950.2	5.004	0.4323	2049.87	1.00987	0.99	287	(Q9Z2I9) SUCB1_MOUSE Succinyl-CoA ligase [ADP-forming] beta-chain, mitochondri	Q9Z2I9
DBDB_18_01.raw	2759	K.YDATM*VEINPMVEDSDGK.V	2	1	1763.5	5.42	0.2825	2029.87	0.94303	0.92	18	(Q9Z2I9) SUCB1_MOUSE Succinyl-CoA ligase [ADP-forming] beta-chain, mitochondri	Q9Z2I9
DBDB_18_03.raw	2657	K.YDATMVEINPM*VEDSDGK.V	2	1	1461.7	5.274	0.4886	2029.87	1.10861	0.93	78	(Q9Z2I9) SUCB1_MOUSE Succinyl-CoA ligase [ADP-forming] beta-chain, mitochondri	Q9Z2I9
DBDB_18_01.raw	2691	K.YDATMVEINPM*VEDSDGK[.V	2	1	1314.1	5.684	0.4427	2033.87	1.13955	0.95	141	(Q9Z2I9) SUCB1_MOUSE Succinyl-CoA ligase [ADP-forming] beta-chain, mitochondri	Q9Z2I9
DBDB_18_02.raw	2723	K.YDATMVEINPM*VEDSDGK[.V	2	1	1134.3	5.498	0.4608	2033.87	1.00107	0.95	113	(Q9Z2I9) SUCB1_MOUSE Succinyl-CoA ligase [ADP-forming] beta-chain, mitochondri	Q9Z2I9
DBDB_18_03.raw	2655	K.YDATMVEINPM*VEDSDGK[.V	2	1	1053.9	5.756	0.4189	2033.87	1.17094	0.95	109	(Q9Z2I9) SUCB1_MOUSE Succinyl-CoA ligase [ADP-forming] beta-chain, mitochondri	Q9Z2I9
DBDB_18_03.raw	3082	K.YDATMVEINPMVEDSDGK.V	2	1	1890	5.729	0.5505	2013.88	0.99503	0.78	24	(Q9Z2I9) SUCB1_MOUSE Succinyl-CoA ligase [ADP-forming] beta-chain, mitochondri	Q9Z2I9
DBDB_18_01.raw	3124	K.YDATMVEINPMVEDSDGK[.V	2	1	875.2	4.738	0.3625	2017.88	1.16098	0.93	72	(Q9Z2I9) SUCB1_MOUSE Succinyl-CoA ligase [ADP-forming] beta-chain, mitochondri	Q9Z2I9
DBDB_18_02.raw	3130	K.YDATMVEINPMVEDSDGK[.V	2	1	1294.7	5.103	0.4586	2017.88	0.97275	0.98	179	(Q9Z2I9) SUCB1_MOUSE Succinyl-CoA ligase [ADP-forming] beta-chain, mitochondri	Q9Z2I9
DBDB_18_03.raw	3098	K.YDATMVEINPMVEDSDGK[.V	2	1	1284.3	5.788	0.4446	2017.88	1.02606	0.93	19	(Q9Z2I9) SUCB1_MOUSE Succinyl-CoA ligase [ADP-forming] beta-chain, mitochondri	Q9Z2I9
DBDB_27_02.raw	1436	R.ICNQVLVCER.K	2	1	992.6	2.896	0.3962	1290.64	-	0.82	70	(Q9Z2I9) SUCB1_MOUSE Succinyl-CoA ligase [ADP-forming] beta-chain, mitochondri	Q9Z2I9
DBDB_27_03.raw	1375	R.ICNQVLVCER.K	2	1	1007.1	2.761	0.3139	1290.64	0.90973	0.96	166	(Q9Z2I9) SUCB1_MOUSE Succinyl-CoA ligase [ADP-forming] beta-chain, mitochondri	Q9Z2I9
DBDB_33_01.raw	4202	R.ICTTLIGLEEHLNALDR[.A	3	3	344.2	2.559	0.2371	1972.03	-	0.96	98	(Q9Z2I9) SUCB1_MOUSE Succinyl-CoA ligase [ADP-forming] beta-chain, mitochondri	Q9Z2I9
DBDB_18_01.raw	5382	R.SFQGPVLIGSAQGGVNIEDVAAENPEAIVK.E	3	1	902.9	4.835	0.3746	3009.55	0.71878	0.9	4	(Q9Z2I9) SUCB1_MOUSE Succinyl-CoA ligase [ADP-forming] beta-chain, mitochondri	Q9Z2I9
DBDB_18_01.raw	7552	R.SFQGPVLIGSAQGGVNIEDVAAENPEAIVK.E	3	1	824.5	3.831	0.3186	3009.55	0.71576	0.96	154	(Q9Z2I9) SUCB1_MOUSE Succinyl-CoA ligase [ADP-forming] beta-chain, mitochondri	Q9Z2I9
DBDB_18_02.raw	11018	R.SFQGPVLIGSAQGGVNIEDVAAENPEAIVK.E	3	1	1469.7	4.678	0.4419	3009.55	0.92486	0.96	20	(Q9Z2I9) SUCB1_MOUSE Succinyl-CoA ligase [ADP-forming] beta-chain, mitochondri	Q9Z2I9
DBDB_18_03.raw	4467	R.SFQGPVLIGSAQGGVNIEDVAAENPEAIVK.E	2	1	551.3	3.175	0.3923	3009.55	-	0.94	112	(Q9Z2I9) SUCB1_MOUSE Succinyl-CoA ligase [ADP-forming] beta-chain, mitochondri	Q9Z2I9
DBDB_19_01.raw	12018	R.SFQGPVLIGSAQGGVNIEDVAAENPEAIVK.E	3	1	1002.2	3.994	0.4821	3009.55	-	0.97	1	(Q9Z2I9) SUCB1_MOUSE Succinyl-CoA ligase [ADP-forming] beta-chain, mitochondri	Q9Z2I9
DBDB_18_01.raw	5506	R.SFQGPVLIGSAQGGVNIEDVAAENPEAIVK[.E	3	1	1102	3.548	0.2625	3013.55	0.89801	0.88	10	(Q9Z2I9) SUCB1_MOUSE Succinyl-CoA ligase [ADP-forming] beta-chain, mitochondri	Q9Z2I9
DBDB_18_01.raw	5632	R.SFQGPVLIGSAQGGVNIEDVAAENPEAIVK[.E	3	1	571.3	3.489	0.2935	3013.55	0.78911	0.72	12	(Q9Z2I9) SUCB1_MOUSE Succinyl-CoA ligase [ADP-forming] beta-chain, mitochondri	Q9Z2I9
DBDB_18_01.raw	5769	R.SFQGPVLIGSAQGGVNIEDVAAENPEAIVK[.E	3	1	785.1	3.94	0.3605	3013.55	0.43536	0.94	42	(Q9Z2I9) SUCB1_MOUSE Succinyl-CoA ligase [ADP-forming] beta-chain, mitochondri	Q9Z2I9
DBDB_18_01.raw	5907	R.SFQGPVLIGSAQGGVNIEDVAAENPEAIVK[.E	3	1	623.2	3.799	0.3681	3013.55	0.58297	0.91	25	(Q9Z2I9) SUCB1_MOUSE Succinyl-CoA ligase [ADP-forming] beta-chain, mitochondri	Q9Z2I9
DBDB_18_02.raw	5402	R.SFQGPVLIGSAQGGVNIEDVAAENPEAIVK[.E	3	1	926.4	4.138	0.391	3013.55	0.77661	0.79	19	(Q9Z2I9) SUCB1_MOUSE Succinyl-CoA ligase [ADP-forming] beta-chain, mitochondri	Q9Z2I9
DBDB_18_02.raw	5659	R.SFQGPVLIGSAQGGVNIEDVAAENPEAIVK[.E	3	1	764	3.343	0.3795	3013.55	0.73659	0.89	106	(Q9Z2I9) SUCB1_MOUSE Succinyl-CoA ligase [ADP-forming] beta-chain, mitochondri	Q9Z2I9
DBDB_18_02.raw	5795	R.SFQGPVLIGSAQGGVNIEDVAAENPEAIVK[.E	3	1	504.6	3.045	0.223	3013.55	0.86488	0.72	5	(Q9Z2I9) SUCB1_MOUSE Succinyl-CoA ligase [ADP-forming] beta-chain, mitochondri	Q9Z2I9
DBDB_18_03.raw	7161	R.SFQGPVLIGSAQGGVNIEDVAAENPEAIVK[.E	3	1	905.2	3.647	0.1894	3013.55	0.77304	0.96	95	(Q9Z2I9) SUCB1_MOUSE Succinyl-CoA ligase [ADP-forming] beta-chain, mitochondri	Q9Z2I9
DBDB_18_03.raw	7521	R.SFQGPVLIGSAQGGVNIEDVAAENPEAIVK[.E	3	1	478.2	3.29	0.1871	3013.55	0.92339	0.9	22	(Q9Z2I9) SUCB1_MOUSE Succinyl-CoA ligase [ADP-forming] beta-chain, mitochondri	Q9Z2I9
DBDB_18_03.raw	9148	R.SFQGPVLIGSAQGGVNIEDVAAENPEAIVK[.E	3	1	476	3.318	0.1522	3013.55	0.81177	0.97	186	(Q9Z2I9) SUCB1_MOUSE Succinyl-CoA ligase [ADP-forming] beta-chain, mitochondri	Q9Z2I9
DBDB_17_01.raw	3985	K.IDATQVEVNPFGETPEGQVVCFDAK.I	3	1	1296.3	5.866	0.5347	2750.31	0.59626	0.7	58	(Q9Z2I8) SUCB2_MOUSE Succinyl-CoA ligase [GDP-forming] beta-chain, mitochondri	Q9Z2I8	0.832187	0.23892
DBDB_17_01.raw	3992	K.IDATQVEVNPFGETPEGQVVCFDAK.I	2	1	1336.8	4.972	0.5306	2750.31	0.919	0.96	71	(Q9Z2I8) SUCB2_MOUSE Succinyl-CoA ligase [GDP-forming] beta-chain, mitochondri	Q9Z2I8
DBDB_17_02.raw	3868	K.IDATQVEVNPFGETPEGQVVCFDAK.I	2	1	1209.5	4.869	0.4833	2750.31	0.82091	0.97	102	(Q9Z2I8) SUCB2_MOUSE Succinyl-CoA ligase [GDP-forming] beta-chain, mitochondri	Q9Z2I8
DBDB_17_02.raw	3997	K.IDATQVEVNPFGETPEGQVVCFDAK.I	2	1	1124.3	5.041	0.5295	2750.31	0.88646	0.87	126	(Q9Z2I8) SUCB2_MOUSE Succinyl-CoA ligase [GDP-forming] beta-chain, mitochondri	Q9Z2I8
DBDB_17_02.raw	4018	K.IDATQVEVNPFGETPEGQVVCFDAK.I	3	1	1506.9	5.178	0.5062	2750.31	0.62846	0.68	33	(Q9Z2I8) SUCB2_MOUSE Succinyl-CoA ligase [GDP-forming] beta-chain, mitochondri	Q9Z2I8
DBDB_17_02.raw	4411	K.IDATQVEVNPFGETPEGQVVCFDAK.I	3	1	412.1	3.407	0.3312	2750.31	-	0.88	9	(Q9Z2I8) SUCB2_MOUSE Succinyl-CoA ligase [GDP-forming] beta-chain, mitochondri	Q9Z2I8
DBDB_17_03.raw	3880	K.IDATQVEVNPFGETPEGQVVCFDAK.I	3	1	802.1	4.589	0.339	2750.31	0.4577	0.84	56	(Q9Z2I8) SUCB2_MOUSE Succinyl-CoA ligase [GDP-forming] beta-chain, mitochondri	Q9Z2I8
DBDB_17_03.raw	3889	K.IDATQVEVNPFGETPEGQVVCFDAK.I	2	1	1216.1	4.914	0.5095	2750.31	0.89181	0.94	69	(Q9Z2I8) SUCB2_MOUSE Succinyl-CoA ligase [GDP-forming] beta-chain, mitochondri	Q9Z2I8
DBDB_17_03.raw	3902	K.IDATQVEVNPFGETPEGQVVCFDAK.I	4	1	1111.1	5.25	0.4861	2750.31	-	0.79	38	(Q9Z2I8) SUCB2_MOUSE Succinyl-CoA ligase [GDP-forming] beta-chain, mitochondri	Q9Z2I8
DBDB_17_03.raw	4018	K.IDATQVEVNPFGETPEGQVVCFDAK.I	3	1	1504.7	5.672	0.475	2750.31	0.63993	0.87	29	(Q9Z2I8) SUCB2_MOUSE Succinyl-CoA ligase [GDP-forming] beta-chain, mitochondri	Q9Z2I8
DBDB_17_03.raw	4020	K.IDATQVEVNPFGETPEGQVVCFDAK.I	2	1	1221.3	5.025	0.4269	2750.31	0.87719	0.94	29	(Q9Z2I8) SUCB2_MOUSE Succinyl-CoA ligase [GDP-forming] beta-chain, mitochondri	Q9Z2I8
DBDB_18_02.raw	3941	K.IDATQVEVNPFGETPEGQVVCFDAK.I	2	1	1068.5	4.657	0.5858	2750.31	1.27564	0.93	72	(Q9Z2I8) SUCB2_MOUSE Succinyl-CoA ligase [GDP-forming] beta-chain, mitochondri	Q9Z2I8
DBDB_17_01.raw	3856	K.IDATQVEVNPFGETPEGQVVCFDAK[.I	3	1	874.6	4.622	0.4776	2754.31	0.61114	0.94	48	(Q9Z2I8) SUCB2_MOUSE Succinyl-CoA ligase [GDP-forming] beta-chain, mitochondri	Q9Z2I8
DBDB_17_01.raw	3867	K.IDATQVEVNPFGETPEGQVVCFDAK[.I	2	1	1387	4.537	0.3505	2754.31	0.94593	0.88	36	(Q9Z2I8) SUCB2_MOUSE Succinyl-CoA ligase [GDP-forming] beta-chain, mitochondri	Q9Z2I8
DBDB_17_01.raw	4119	K.IDATQVEVNPFGETPEGQVVCFDAK[.I	3	1	728.5	4.249	0.4627	2754.31	0.77099	0.56	16	(Q9Z2I8) SUCB2_MOUSE Succinyl-CoA ligase [GDP-forming] beta-chain, mitochondri	Q9Z2I8
DBDB_17_02.raw	3861	K.IDATQVEVNPFGETPEGQVVCFDAK[.I	3	1	1165.9	4.934	0.5173	2754.31	0.54947	0.96	233	(Q9Z2I8) SUCB2_MOUSE Succinyl-CoA ligase [GDP-forming] beta-chain, mitochondri	Q9Z2I8
DBDB_17_02.raw	4076	K.IDATQVEVNPFGETPEGQVVCFDAK[.I	2	1	1071.5	4.469	0.4413	2754.31	1.14816	0.97	111	(Q9Z2I8) SUCB2_MOUSE Succinyl-CoA ligase [GDP-forming] beta-chain, mitochondri	Q9Z2I8
DBDB_18_01.raw	3904	K.IDATQVEVNPFGETPEGQVVCFDAK[.I	3	1	844.4	4.774	0.5004	2754.31	0.94045	0.89	7	(Q9Z2I8) SUCB2_MOUSE Succinyl-CoA ligase [GDP-forming] beta-chain, mitochondri	Q9Z2I8
DBDB_18_01.raw	3911	K.IDATQVEVNPFGETPEGQVVCFDAK[.I	2	1	1394.2	4.51	0.355	2754.31	1.43757	0.93	43	(Q9Z2I8) SUCB2_MOUSE Succinyl-CoA ligase [GDP-forming] beta-chain, mitochondri	Q9Z2I8
DBDB_18_03.raw	3874	K.IDATQVEVNPFGETPEGQVVCFDAK[.I	3	1	1179.6	4.973	0.5409	2754.31	0.77948	0.99	136	(Q9Z2I8) SUCB2_MOUSE Succinyl-CoA ligase [GDP-forming] beta-chain, mitochondri	Q9Z2I8
DBDB_18_03.raw	3876	K.IDATQVEVNPFGETPEGQVVCFDAK[.I	2	1	1490.4	4.694	0.4067	2754.31	1.28083	0.99	280	(Q9Z2I8) SUCB2_MOUSE Succinyl-CoA ligase [GDP-forming] beta-chain, mitochondri	Q9Z2I8
DBDB_25_01.raw	2181	K.INFDDNAEFR.Q	2	1	1031	3.521	0.395	1240.56	1.16446	0.89	7	(Q9Z2I8) SUCB2_MOUSE Succinyl-CoA ligase [GDP-forming] beta-chain, mitochondri	Q9Z2I8
DBDB_25_02.raw	2071	K.INFDDNAEFR.Q	2	1	699.9	2.474	0.143	1240.56	1.48153	0.65	38	(Q9Z2I8) SUCB2_MOUSE Succinyl-CoA ligase [GDP-forming] beta-chain, mitochondri	Q9Z2I8
DBDB_25_02.raw	2203	K.INFDDNAEFR.Q	2	1	872.8	2.999	0.337	1240.56	-	0.87	52	(Q9Z2I8) SUCB2_MOUSE Succinyl-CoA ligase [GDP-forming] beta-chain, mitochondri	Q9Z2I8
DBDB_24_01.raw	1099	K.SENEPIENEAAR.Y	2	1	868.9	3.662	0.3497	1358.62	-	0.97	98	(Q9Z2I8) SUCB2_MOUSE Succinyl-CoA ligase [GDP-forming] beta-chain, mitochondri	Q9Z2I8
DBDB_24_01.raw	979	K.SENEPIENEAAR.Y	2	1	786.8	2.91	0.3288	1358.62	0.51911	0.93	18	(Q9Z2I8) SUCB2_MOUSE Succinyl-CoA ligase [GDP-forming] beta-chain, mitochondri	Q9Z2I8
DBDB_24_02.raw	900	K.SENEPIENEAAR.Y	2	2	458.3	2.438	0.2149	1358.62	-	0.8	11	(Q9Z2I8) SUCB2_MOUSE Succinyl-CoA ligase [GDP-forming] beta-chain, mitochondri	Q9Z2I8
DBDB_24_03.raw	1003	K.SENEPIENEAAR.Y	2	1	731.7	3.621	0.2152	1358.62	0.40979	0.79	5	(Q9Z2I8) SUCB2_MOUSE Succinyl-CoA ligase [GDP-forming] beta-chain, mitochondri	Q9Z2I8
DBDB_24_03.raw	909	K.SENEPIENEAAR.Y	2	1	522.2	3.083	0.3171	1358.62	0.51937	0.95	88	(Q9Z2I8) SUCB2_MOUSE Succinyl-CoA ligase [GDP-forming] beta-chain, mitochondri	Q9Z2I8
DBDB_20_01.raw	2652	K.SSGLPITSAVDLEDAAK.K	2	1	1019.2	4.027	0.6117	1673.86	0.673	0.81	1	(Q9Z2I8) SUCB2_MOUSE Succinyl-CoA ligase [GDP-forming] beta-chain, mitochondri	Q9Z2I8
DBDB_20_02.raw	2890	K.SSGLPITSAVDLEDAAK.K	2	1	908.3	4.426	0.6464	1673.86	0.55941	0.97	246	(Q9Z2I8) SUCB2_MOUSE Succinyl-CoA ligase [GDP-forming] beta-chain, mitochondri	Q9Z2I8
DBDB_20_03.raw	2957	K.SSGLPITSAVDLEDAAK.K	2	1	971	3.796	0.3086	1673.86	0.62178	0.87	19	(Q9Z2I8) SUCB2_MOUSE Succinyl-CoA ligase [GDP-forming] beta-chain, mitochondri	Q9Z2I8
DBDB_21_01.raw	2976	K.SSGLPITSAVDLEDAAK.K	2	1	1086.3	4.011	0.4044	1673.86	-	0.98	133	(Q9Z2I8) SUCB2_MOUSE Succinyl-CoA ligase [GDP-forming] beta-chain, mitochondri	Q9Z2I8
DBDB_21_01.raw	3106	K.SSGLPITSAVDLEDAAK.K	2	1	972.2	3.794	0.4553	1673.86	0.67362	0.91	34	(Q9Z2I8) SUCB2_MOUSE Succinyl-CoA ligase [GDP-forming] beta-chain, mitochondri	Q9Z2I8
DBDB_21_02.raw	2944	K.SSGLPITSAVDLEDAAK.K	2	1	1081.2	4.72	0.5666	1673.86	1.03549	0.88	26	(Q9Z2I8) SUCB2_MOUSE Succinyl-CoA ligase [GDP-forming] beta-chain, mitochondri	Q9Z2I8
DBDB_21_03.raw	3025	K.SSGLPITSAVDLEDAAK.K	2	1	1043.9	4.536	0.5841	1673.86	1.10877	0.91	122	(Q9Z2I8) SUCB2_MOUSE Succinyl-CoA ligase [GDP-forming] beta-chain, mitochondri	Q9Z2I8
DBDB_20_02.raw	2894	K.SSGLPITSAVDLEDAAK[.K	2	1	1015.7	4.712	0.5131	1677.86	0.50545	0.85	126	(Q9Z2I8) SUCB2_MOUSE Succinyl-CoA ligase [GDP-forming] beta-chain, mitochondri	Q9Z2I8
DBDB_20_03.raw	2976	K.SSGLPITSAVDLEDAAK[.K	2	1	931.6	4.975	0.5279	1677.86	0.50981	0.8	20	(Q9Z2I8) SUCB2_MOUSE Succinyl-CoA ligase [GDP-forming] beta-chain, mitochondri	Q9Z2I8
DBDB_21_02.raw	2961	K.SSGLPITSAVDLEDAAK[.K	2	1	1102.7	5.252	0.5238	1677.86	0.84409	0.96	28	(Q9Z2I8) SUCB2_MOUSE Succinyl-CoA ligase [GDP-forming] beta-chain, mitochondri	Q9Z2I8
DBDB_21_03.raw	3051	K.SSGLPITSAVDLEDAAK[.K	2	1	1000.8	4.944	0.5817	1677.86	0.90542	0.89	36	(Q9Z2I8) SUCB2_MOUSE Succinyl-CoA ligase [GDP-forming] beta-chain, mitochondri	Q9Z2I8
DBDB_23_01.raw	2095	R.LEGTNVQEAQNILK.S	2	1	1768.4	5.44	0.3721	1556.83	0.82975	0.94	33	(Q9Z2I8) SUCB2_MOUSE Succinyl-CoA ligase [GDP-forming] beta-chain, mitochondri	Q9Z2I8
DBDB_23_02.raw	2119	R.LEGTNVQEAQNILK.S	2	1	1308.7	4.105	0.2545	1556.83	0.71486	0.72	19	(Q9Z2I8) SUCB2_MOUSE Succinyl-CoA ligase [GDP-forming] beta-chain, mitochondri	Q9Z2I8
DBDB_23_03.raw	2086	R.LEGTNVQEAQNILK.S	2	1	1585.3	5.272	0.4112	1556.83	0.84844	0.75	32	(Q9Z2I8) SUCB2_MOUSE Succinyl-CoA ligase [GDP-forming] beta-chain, mitochondri	Q9Z2I8
DBDB_23_02.raw	2126	R.LEGTNVQEAQNILK[.S	2	1	819.3	3.38	0.1698	1560.83	0.81646	0.81	1	(Q9Z2I8) SUCB2_MOUSE Succinyl-CoA ligase [GDP-forming] beta-chain, mitochondri	Q9Z2I8
DBDB_25_01.raw	2651	R.M*AENLGFLGSLK.N	2	1	2090	3.943	0.4426	1295.67	0.93021	0.95	91	(Q9Z2I8) SUCB2_MOUSE Succinyl-CoA ligase [GDP-forming] beta-chain, mitochondri	Q9Z2I8
DBDB_25_02.raw	2666	R.M*AENLGFLGSLK.N	2	1	2053.2	4.107	0.4591	1295.67	0.84564	0.99	287	(Q9Z2I8) SUCB2_MOUSE Succinyl-CoA ligase [GDP-forming] beta-chain, mitochondri	Q9Z2I8
DBDB_25_01.raw	2630	R.M*AENLGFLGSLK[.N	2	1	1934.7	3.499	0.4269	1299.67	0.81201	0.98	191	(Q9Z2I8) SUCB2_MOUSE Succinyl-CoA ligase [GDP-forming] beta-chain, mitochondri	Q9Z2I8
DBDB_25_03.raw	2664	R.M*AENLGFLGSLK[.N	2	1	2243.2	4.035	0.503	1299.67	0.77959	0.91	69	(Q9Z2I8) SUCB2_MOUSE Succinyl-CoA ligase [GDP-forming] beta-chain, mitochondri	Q9Z2I8
DBDB_25_03.raw	2798	R.M*AENLGFLGSLK[.N	2	1	1320.5	2.14	0.1376	1299.67	-	0.93	19	(Q9Z2I8) SUCB2_MOUSE Succinyl-CoA ligase [GDP-forming] beta-chain, mitochondri	Q9Z2I8
DBDB_25_01.raw	3074	R.MAENLGFLGSLK.N	2	1	1397.4	3.953	0.4086	1279.67	0.77413	0.85	1	(Q9Z2I8) SUCB2_MOUSE Succinyl-CoA ligase [GDP-forming] beta-chain, mitochondri	Q9Z2I8
DBDB_25_01.raw	3210	R.MAENLGFLGSLK.N	2	1	1030.1	3.401	0.364	1279.67	0.77898	0.75	17	(Q9Z2I8) SUCB2_MOUSE Succinyl-CoA ligase [GDP-forming] beta-chain, mitochondri	Q9Z2I8
DBDB_25_01.raw	3624	R.MAENLGFLGSLK.N	2	1	575.1	2.007	0.1743	1279.67	1.08796	0.9	20	(Q9Z2I8) SUCB2_MOUSE Succinyl-CoA ligase [GDP-forming] beta-chain, mitochondri	Q9Z2I8
DBDB_25_02.raw	3064	R.MAENLGFLGSLK.N	2	1	1381.1	3.916	0.4416	1279.67	0.823	0.96	76	(Q9Z2I8) SUCB2_MOUSE Succinyl-CoA ligase [GDP-forming] beta-chain, mitochondri	Q9Z2I8
DBDB_25_02.raw	3196	R.MAENLGFLGSLK.N	2	1	1046.4	3.811	0.3957	1279.67	0.76957	0.66	5	(Q9Z2I8) SUCB2_MOUSE Succinyl-CoA ligase [GDP-forming] beta-chain, mitochondri	Q9Z2I8
DBDB_25_03.raw	3048	R.MAENLGFLGSLK.N	2	1	1390.7	3.773	0.4422	1279.67	0.84651	0.99	213	(Q9Z2I8) SUCB2_MOUSE Succinyl-CoA ligase [GDP-forming] beta-chain, mitochondri	Q9Z2I8
DBDB_25_01.raw	3171	R.MAENLGFLGSLK[.N	2	1	1306.1	3.902	0.4993	1283.67	0.78485	0.93	56	(Q9Z2I8) SUCB2_MOUSE Succinyl-CoA ligase [GDP-forming] beta-chain, mitochondri	Q9Z2I8
DBDB_25_01.raw	3492	R.MAENLGFLGSLK[.N	2	1	1154.2	2.79	0.3973	1283.67	-	0.89	78	(Q9Z2I8) SUCB2_MOUSE Succinyl-CoA ligase [GDP-forming] beta-chain, mitochondri	Q9Z2I8
DBDB_25_02.raw	3031	R.MAENLGFLGSLK[.N	2	1	1222	3.418	0.4014	1283.67	-	0.74	1	(Q9Z2I8) SUCB2_MOUSE Succinyl-CoA ligase [GDP-forming] beta-chain, mitochondri	Q9Z2I8
DBDB_25_02.raw	3184	R.MAENLGFLGSLK[.N	2	1	1414.2	3.966	0.4887	1283.67	0.74396	0.97	152	(Q9Z2I8) SUCB2_MOUSE Succinyl-CoA ligase [GDP-forming] beta-chain, mitochondri	Q9Z2I8
DBDB_25_02.raw	3488	R.MAENLGFLGSLK[.N	2	1	786.6	2.383	0.3139	1283.67	1.17848	0.9	101	(Q9Z2I8) SUCB2_MOUSE Succinyl-CoA ligase [GDP-forming] beta-chain, mitochondri	Q9Z2I8
DBDB_25_03.raw	3007	R.MAENLGFLGSLK[.N	2	1	922.9	2.753	0.3107	1283.67	-	0.84	30	(Q9Z2I8) SUCB2_MOUSE Succinyl-CoA ligase [GDP-forming] beta-chain, mitochondri	Q9Z2I8
DBDB_25_03.raw	3154	R.MAENLGFLGSLK[.N	2	1	1319.9	4.136	0.4588	1283.67	0.81716	0.98	273	(Q9Z2I8) SUCB2_MOUSE Succinyl-CoA ligase [GDP-forming] beta-chain, mitochondri	Q9Z2I8
DBDB_25_03.raw	3284	R.MAENLGFLGSLK[.N	2	1	1348.8	3.661	0.4924	1283.67	0.93589	0.9	116	(Q9Z2I8) SUCB2_MOUSE Succinyl-CoA ligase [GDP-forming] beta-chain, mitochondri	Q9Z2I8
DBDB_24_01.raw	4476	R.SHNGPVIVGSPQGGVDIEEVAASSPELIFK.E	2	1	729.4	4.084	0.4038	3033.55	-	0.83	71	(Q9Z2I8) SUCB2_MOUSE Succinyl-CoA ligase [GDP-forming] beta-chain, mitochondri	Q9Z2I8
DBDB_24_01.raw	4563	R.SHNGPVIVGSPQGGVDIEEVAASSPELIFK.E	3	1	1138.8	3.221	0.2872	3033.55	-	0.91	43	(Q9Z2I8) SUCB2_MOUSE Succinyl-CoA ligase [GDP-forming] beta-chain, mitochondri	Q9Z2I8
DBDB_24_02.raw	4436	R.SHNGPVIVGSPQGGVDIEEVAASSPELIFK.E	3	1	1114.4	3.097	0.2367	3033.55	-	0.92	25	(Q9Z2I8) SUCB2_MOUSE Succinyl-CoA ligase [GDP-forming] beta-chain, mitochondri	Q9Z2I8
DBDB_24_02.raw	4488	R.SHNGPVIVGSPQGGVDIEEVAASSPELIFK.E	2	1	678.3	4.224	0.4129	3033.55	-	0.98	220	(Q9Z2I8) SUCB2_MOUSE Succinyl-CoA ligase [GDP-forming] beta-chain, mitochondri	Q9Z2I8
DBDB_24_03.raw	4462	R.SHNGPVIVGSPQGGVDIEEVAASSPELIFK.E	3	1	1182.2	3.434	0.3883	3033.55	-	0.91	5	(Q9Z2I8) SUCB2_MOUSE Succinyl-CoA ligase [GDP-forming] beta-chain, mitochondri	Q9Z2I8
DBDB_25_02.raw	4565	R.SHNGPVIVGSPQGGVDIEEVAASSPELIFK.E	3	1	1035	3.731	0.2215	3033.55	-	0.98	136	(Q9Z2I8) SUCB2_MOUSE Succinyl-CoA ligase [GDP-forming] beta-chain, mitochondri	Q9Z2I8
DBDB_27_02.raw	4415	R.SHNGPVIVGSPQGGVDIEEVAASSPELIFK.E	3	1	969.4	3.503	0.3464	3033.55	-	0.84	31	(Q9Z2I8) SUCB2_MOUSE Succinyl-CoA ligase [GDP-forming] beta-chain, mitochondri	Q9Z2I8
DBDB_24_01.raw	4499	R.SHNGPVIVGSPQGGVDIEEVAASSPELIFK[.E	2	2	363.4	4.073	0.2958	3037.55	-	0.55	11	(Q9Z2I8) SUCB2_MOUSE Succinyl-CoA ligase [GDP-forming] beta-chain, mitochondri	Q9Z2I8
DBDB_20_01.raw	2426	K.DGNINIDDLVK.V	2	1	921.1	2.783	0.3349	1215.62	1.1568	0.95	18	(Q9Z2I0) LETM1_MOUSE Leucine zipper-EF-hand-containing transmembrane protein 1	Q9Z2I0	1.05454	0.394428
DBDB_20_02.raw	2644	K.DGNINIDDLVK.V	2	1	638.7	2.259	0.1523	1215.62	-	0.96	113	(Q9Z2I0) LETM1_MOUSE Leucine zipper-EF-hand-containing transmembrane protein 1	Q9Z2I0
DBDB_20_03.raw	2744	K.DGNINIDDLVK.V	2	1	1122.2	2.962	0.3696	1215.62	1.00394	0.79	1	(Q9Z2I0) LETM1_MOUSE Leucine zipper-EF-hand-containing transmembrane protein 1	Q9Z2I0
DBDB_18_02.raw	6101	K.DIQPEVAEATLPGRPGPEPQPPVDDVILPSEVLTDTAPVLEGLK.G	3	1	867.7	5.619	0.6346	4599.41	-	0.61	4	(Q9Z2I0) LETM1_MOUSE Leucine zipper-EF-hand-containing transmembrane protein 1	Q9Z2I0
DBDB_19_01.raw	2910	K.EDVQDYSEDLQEIK.K	2	1	1881.6	5.111	0.3794	1710.77	-	0.92	66	(Q9Z2I0) LETM1_MOUSE Leucine zipper-EF-hand-containing transmembrane protein 1	Q9Z2I0
DBDB_19_02.raw	2886	K.EDVQDYSEDLQEIK.K	2	1	2110.3	5.164	0.4554	1710.77	1.05353	0.68	36	(Q9Z2I0) LETM1_MOUSE Leucine zipper-EF-hand-containing transmembrane protein 1	Q9Z2I0
DBDB_19_02.raw	2872	K.EDVQDYSEDLQEIK[.K	3	1	2287.2	4.933	0.2404	1714.77	1.10123	0.91	117	(Q9Z2I0) LETM1_MOUSE Leucine zipper-EF-hand-containing transmembrane protein 1	Q9Z2I0
DBDB_19_02.raw	2893	K.EDVQDYSEDLQEIK[.K	2	1	1934.7	5.571	0.4519	1714.77	0.9475	0.98	199	(Q9Z2I0) LETM1_MOUSE Leucine zipper-EF-hand-containing transmembrane protein 1	Q9Z2I0
DBDB_19_03.raw	2863	K.EDVQDYSEDLQEIK[.K	2	1	1546.8	3.722	0.3617	1714.77	0.94442	0.93	104	(Q9Z2I0) LETM1_MOUSE Leucine zipper-EF-hand-containing transmembrane protein 1	Q9Z2I0
DBDB_21_01.raw	2388	K.EEIDILSDACSK.L	2	1	1299.7	3.543	0.3839	1379.64	1.0236	0.96	89	(Q9Z2I0) LETM1_MOUSE Leucine zipper-EF-hand-containing transmembrane protein 1	Q9Z2I0
DBDB_21_02.raw	2337	K.EEIDILSDACSK.L	2	1	1383.1	3.674	0.3406	1379.64	1.00887	0.97	160	(Q9Z2I0) LETM1_MOUSE Leucine zipper-EF-hand-containing transmembrane protein 1	Q9Z2I0
DBDB_21_03.raw	2449	K.EEIDILSDACSK.L	2	1	1378.4	3.521	0.3317	1379.64	1.01102	0.92	1	(Q9Z2I0) LETM1_MOUSE Leucine zipper-EF-hand-containing transmembrane protein 1	Q9Z2I0
DBDB_15_01.raw	6471	K.HIPEHKLISLTSALDDNK.D	2	2	430.2	2.325	0.1649	2031.09	-	0.95	39	(Q9Z2I0) LETM1_MOUSE Leucine zipper-EF-hand-containing transmembrane protein 1	Q9Z2I0
DBDB_15_01.raw	6580	K.HIPEHKLISLTSALDDNK.D	2	1	528.5	2.54	0.192	2031.09	-	0.97	10	(Q9Z2I0) LETM1_MOUSE Leucine zipper-EF-hand-containing transmembrane protein 1	Q9Z2I0
DBDB_21_01.raw	2374	K.LEEGGPVYSPPAQVVVR.K	2	1	552.5	3.656	0.3666	1796.95	0.81101	0.88	25	(Q9Z2I0) LETM1_MOUSE Leucine zipper-EF-hand-containing transmembrane protein 1	Q9Z2I0
DBDB_21_02.raw	2314	K.LEEGGPVYSPPAQVVVR.K	2	1	702.1	3.39	0.351	1796.95	0.94353	0.95	87	(Q9Z2I0) LETM1_MOUSE Leucine zipper-EF-hand-containing transmembrane protein 1	Q9Z2I0
DBDB_23_03.raw	2532	K.LISLTSALDDNK[.D	2	1	1300.5	3.134	0.152	1293.69	0.63268	0.93	31	(Q9Z2I0) LETM1_MOUSE Leucine zipper-EF-hand-containing transmembrane protein 1	Q9Z2I0
DBDB_26_01.raw	4309	K.LISLTSALDDNKDGNINIDDLVK.V	3	1	379.6	3.233	0.3892	2486.3	0.44179	0.93	21	(Q9Z2I0) LETM1_MOUSE Leucine zipper-EF-hand-containing transmembrane protein 1	Q9Z2I0
DBDB_27_03.raw	4243	K.LISLTSALDDNKDGNINIDDLVK.V	3	1	516.2	3.731	0.4137	2486.3	0.53913	0.93	93	(Q9Z2I0) LETM1_MOUSE Leucine zipper-EF-hand-containing transmembrane protein 1	Q9Z2I0
DBDB_24_01.raw	3569	K.LLELQSIGTNNFLR[.F	2	1	1729.9	4.133	0.3852	1621.9	1.38774	0.98	176	(Q9Z2I0) LETM1_MOUSE Leucine zipper-EF-hand-containing transmembrane protein 1	Q9Z2I0
DBDB_24_02.raw	3590	K.LLELQSIGTNNFLR[.F	2	1	1609	3.656	0.4088	1621.9	1.67976	0.96	163	(Q9Z2I0) LETM1_MOUSE Leucine zipper-EF-hand-containing transmembrane protein 1	Q9Z2I0
DBDB_24_03.raw	3585	K.LLELQSIGTNNFLR[.F	2	1	1927.9	3.575	0.3747	1621.9	1.57094	0.75	33	(Q9Z2I0) LETM1_MOUSE Leucine zipper-EF-hand-containing transmembrane protein 1	Q9Z2I0
DBDB_23_01.raw	2266	K.STLQTLPEIVAK.E	2	1	437.6	2.145	0.2553	1299.75	2.13093	0.97	92	(Q9Z2I0) LETM1_MOUSE Leucine zipper-EF-hand-containing transmembrane protein 1	Q9Z2I0
DBDB_21_01.raw	2807	R.AM*YLPDTLSPADQLK.S	2	1	409.6	2.68	0.2085	1678.84	0.92739	0.91	2	(Q9Z2I0) LETM1_MOUSE Leucine zipper-EF-hand-containing transmembrane protein 1	Q9Z2I0
DBDB_21_03.raw	2848	R.AM*YLPDTLSPADQLK[.S	2	1	678.5	3.635	0.4116	1682.84	0.77509	0.96	125	(Q9Z2I0) LETM1_MOUSE Leucine zipper-EF-hand-containing transmembrane protein 1	Q9Z2I0
DBDB_21_03.raw	1361	R.VSAADSTQVDGGTPM*VK.D	2	1	310.3	3.429	0.4208	1678.8	-	0.91	110	(Q9Z2H5) E41L1_MOUSE Band 4.1-like protein 1 - Mus musculus (Mouse)	Q9Z2H5	NA	NA
DBDB_20_02.raw	1262	K.AETSESSGSAPAVPEASASPK.Q	2	1	1175.6	5.419	0.6232	1959.91	0.56931	0.83	56	(Q9Z2D6) MECP2_MOUSE Methyl-CpG-binding protein 2 - Mus musculus (Mouse)	Q9Z2D6	0.690896	0.0963493
DBDB_20_03.raw	1349	K.AETSESSGSAPAVPEASASPK.Q	2	1	1161.8	5.744	0.6246	1959.91	-	0.97	157	(Q9Z2D6) MECP2_MOUSE Methyl-CpG-binding protein 2 - Mus musculus (Mouse)	Q9Z2D6
DBDB_21_01.raw	1340	K.AETSESSGSAPAVPEASASPK.Q	2	1	1153	5.658	0.6366	1959.91	0.72888	0.97	184	(Q9Z2D6) MECP2_MOUSE Methyl-CpG-binding protein 2 - Mus musculus (Mouse)	Q9Z2D6
DBDB_21_02.raw	1344	K.AETSESSGSAPAVPEASASPK.Q	2	1	978.2	5.468	0.6037	1959.91	0.6307	0.98	132	(Q9Z2D6) MECP2_MOUSE Methyl-CpG-binding protein 2 - Mus musculus (Mouse)	Q9Z2D6
DBDB_21_03.raw	1355	K.AETSESSGSAPAVPEASASPK.Q	2	1	1286.4	5.919	0.6452	1959.91	0.70387	0.97	182	(Q9Z2D6) MECP2_MOUSE Methyl-CpG-binding protein 2 - Mus musculus (Mouse)	Q9Z2D6
DBDB_20_03.raw	1354	K.AETSESSGSAPAVPEASASPK[.Q	2	1	1363.6	6.457	0.5394	1963.91	0.82172	0.98	147	(Q9Z2D6) MECP2_MOUSE Methyl-CpG-binding protein 2 - Mus musculus (Mouse)	Q9Z2D6
DBDB_19_02.raw	3611	K.VGDTSLDPNDFDFTVTGR.G	2	1	974	5.071	0.5	1955.9	-	0.8	1	(Q9Z2D6) MECP2_MOUSE Methyl-CpG-binding protein 2 - Mus musculus (Mouse)	Q9Z2D6
DBDB_19_03.raw	3649	K.VGDTSLDPNDFDFTVTGR.G	2	1	888.3	5.373	0.5575	1955.9	-	0.94	40	(Q9Z2D6) MECP2_MOUSE Methyl-CpG-binding protein 2 - Mus musculus (Mouse)	Q9Z2D6
DBDB_19_01.raw	3619	K.VGDTSLDPNDFDFTVTGR[.G	2	1	587.9	3.803	0.3763	1959.9	-	0.93	20	(Q9Z2D6) MECP2_MOUSE Methyl-CpG-binding protein 2 - Mus musculus (Mouse)	Q9Z2D6
DBDB_20_03.raw	1292	R.TPGNQATAASGTPAPPAR.S	2	1	752.6	3.044	0.4308	1664.84	-	0.97	86	(Q9Z2C8) YBOX2_MOUSE Y-box-binding protein 2 - Mus musculus (Mouse)	Q9Z2C8	NA	NA
DBDB_21_02.raw	1766	K.VSQDGVSQDVSETVPR.L	2	1	1554.1	4.313	0.4236	1702.82	0.81776	0.98	133	(Q9Z2C5) MTM1_MOUSE Myotubularin - Mus musculus (Mouse)	Q9Z2C5	0.81776	NA
DBDB_21_03.raw	1834	K.VSQDGVSQDVSETVPR.L	2	1	615	2.876	0.2566	1702.82	-	0.98	228	(Q9Z2C5) MTM1_MOUSE Myotubularin - Mus musculus (Mouse)	Q9Z2C5
DBDB_22_01.raw	5272	K.QADLSFSSPVEMKNEK[.S	2	1	349.8	2.161	0.1424	1813.87	0.34728	0.93	53	(Q9Z204) HNRPC_MOUSE Heterogeneous nuclear ribonucleoproteins C1/C2 - Mus musc	Q9Z204	0.78893	0.624587
DBDB_23_01.raw	2601	K.VDSLLESLEK[.I	2	1	621.2	3.052	0.3582	1136.61	1.23058	0.92	24	(Q9Z204) HNRPC_MOUSE Heterogeneous nuclear ribonucleoproteins C1/C2 - Mus musc	Q9Z204
DBDB_34_01.raw	1213	K.SVPVEGESEHVSAAK.T	2	1	384.9	3.499	0.5652	1525.75	0.92272	0.86	30	(Q9Z1Z0) USO1_MOUSE General vesicular transport factor p115 - Mus musculus (Mo	Q9Z1Z0	1.11881	0.148997
DBDB_34_03.raw	1245	K.SVPVEGESEHVSAAK.T	2	1	417.4	3.75	0.5409	1525.75	1.02531	0.97	173	(Q9Z1Z0) USO1_MOUSE General vesicular transport factor p115 - Mus musculus (Mo	Q9Z1Z0
DBDB_51_02.raw	2661	K.TLEQHDNIVTHYK[.N	2	1	582.9	2.757	0.3204	1601.8	1.10801	0.92	35	(Q9Z1Z0) USO1_MOUSE General vesicular transport factor p115 - Mus musculus (Mo	Q9Z1Z0
DBDB_33_01.raw	1403	R.GVMGGQSAGPQHTEAETIQK[.L	3	1	1014.8	3.249	0.3646	2029.97	1.28138	0.76	12	(Q9Z1Z0) USO1_MOUSE General vesicular transport factor p115 - Mus musculus (Mo	Q9Z1Z0
DBDB_33_02.raw	1442	R.GVMGGQSAGPQHTEAETIQK[.L	3	1	776.8	4.138	0.4184	2029.97	1.35215	0.87	19	(Q9Z1Z0) USO1_MOUSE General vesicular transport factor p115 - Mus musculus (Mo	Q9Z1Z0
DBDB_33_03.raw	1378	R.GVMGGQSAGPQHTEAETIQK[.L	3	1	885.5	4.84	0.376	2029.97	-	0.98	181	(Q9Z1Z0) USO1_MOUSE General vesicular transport factor p115 - Mus musculus (Mo	Q9Z1Z0
DBDB_25_01.raw	1543	R.LQTENCELLQR.A	2	1	997.6	3.351	0.3596	1403.7	1.05604	0.8	1	(Q9Z1Z0) USO1_MOUSE General vesicular transport factor p115 - Mus musculus (Mo	Q9Z1Z0
DBDB_25_03.raw	1546	R.LQTENCELLQR.A	2	1	1086.2	3.041	0.3854	1403.7	1.08604	0.98	202	(Q9Z1Z0) USO1_MOUSE General vesicular transport factor p115 - Mus musculus (Mo	Q9Z1Z0
DBDB_21_01.raw	1743	K.LASGCDGSEIPDEVK.L	2	1	1207.3	4.414	0.4485	1576.72	0.92921	0.96	93	(Q9Z1W9) STK39_MOUSE STE20/SPS1-related proline-alanine-rich protein kinase -	Q9Z1W9	0.92921	NA
DBDB_21_03.raw	1743	K.LASGCDGSEIPDEVK.L	2	1	1015.3	4.045	0.2888	1576.72	-	0.75	18	(Q9Z1W9) STK39_MOUSE STE20/SPS1-related proline-alanine-rich protein kinase -	Q9Z1W9
DBDB_26_02.raw	1439	K.LIIVEGCQR.Q	2	1	1146.2	2.174	0.5227	1087.6	SHARED	0.75	44	(Q9Z1W8) AT12A_MOUSE Potassium-transporting ATPase alpha chain 2 - Mus musculu	Q9Z1W8	NA	NA
DBDB_01_03.raw	6142	K.NAADM*VLLDDNFASIVTGVEEGR[.L	2	1	375.4	2.618	0.1838	2456.17	-	0.94	40	(Q9Z1W8) AT12A_MOUSE Potassium-transporting ATPase alpha chain 2 - Mus musculu	Q9Z1W8
DBDB_34_01.raw	1427	K.VIM*VTGDHPITAK.A	2	1	1168.4	4.383	0.4338	1397.75	SHARED	0.95	109	(Q9Z1W8) AT12A_MOUSE Potassium-transporting ATPase alpha chain 2 - Mus musculu	Q9Z1W8
DBDB_34_02.raw	1504	K.VIM*VTGDHPITAK.A	3	1	498.9	3.091	0.4911	1397.75	SHARED	0.95	116	(Q9Z1W8) AT12A_MOUSE Potassium-transporting ATPase alpha chain 2 - Mus musculu	Q9Z1W8
DBDB_34_03.raw	1532	K.VIM*VTGDHPITAK.A	2	1	1132.9	4.257	0.5626	1397.75	SHARED	0.79	5	(Q9Z1W8) AT12A_MOUSE Potassium-transporting ATPase alpha chain 2 - Mus musculu	Q9Z1W8
DBDB_34_03.raw	1546	K.VIM*VTGDHPITAK[.A	2	1	686.3	4.16	0.5626	1401.75	SHARED	0.95	44	(Q9Z1W8) AT12A_MOUSE Potassium-transporting ATPase alpha chain 2 - Mus musculu	Q9Z1W8
DBDB_34_01.raw	1613	K.VIMVTGDHPITAK.A	2	1	1747.9	4.213	0.2488	1381.75	SHARED	0.99	232	(Q9Z1W8) AT12A_MOUSE Potassium-transporting ATPase alpha chain 2 - Mus musculu	Q9Z1W8
DBDB_34_01.raw	1759	K.VIMVTGDHPITAK.A	2	1	1092.8	4.013	0.3193	1381.75	SHARED	0.98	202	(Q9Z1W8) AT12A_MOUSE Potassium-transporting ATPase alpha chain 2 - Mus musculu	Q9Z1W8
DBDB_34_02.raw	1609	K.VIMVTGDHPITAK.A	2	1	1606.3	4.222	0.2477	1381.75	SHARED	0.94	77	(Q9Z1W8) AT12A_MOUSE Potassium-transporting ATPase alpha chain 2 - Mus musculu	Q9Z1W8
DBDB_34_03.raw	1627	K.VIMVTGDHPITAK.A	2	1	1742.6	4.434	0.5626	1381.75	SHARED	0.8	35	(Q9Z1W8) AT12A_MOUSE Potassium-transporting ATPase alpha chain 2 - Mus musculu	Q9Z1W8
DBDB_34_03.raw	1760	K.VIMVTGDHPITAK.A	2	1	982.1	3.678	0.5429	1381.75	SHARED	0.97	214	(Q9Z1W8) AT12A_MOUSE Potassium-transporting ATPase alpha chain 2 - Mus musculu	Q9Z1W8
DBDB_34_01.raw	1627	K.VIMVTGDHPITAK[.A	2	1	1275.5	4.396	0.2488	1385.75	SHARED	0.95	56	(Q9Z1W8) AT12A_MOUSE Potassium-transporting ATPase alpha chain 2 - Mus musculu	Q9Z1W8
DBDB_34_02.raw	1615	K.VIMVTGDHPITAK[.A	2	1	1169.3	4.505	0.2477	1385.75	SHARED	0.85	96	(Q9Z1W8) AT12A_MOUSE Potassium-transporting ATPase alpha chain 2 - Mus musculu	Q9Z1W8
DBDB_34_03.raw	1636	K.VIMVTGDHPITAK[.A	2	1	1476.1	4.542	0.5626	1385.75	SHARED	0.9	29	(Q9Z1W8) AT12A_MOUSE Potassium-transporting ATPase alpha chain 2 - Mus musculu	Q9Z1W8
DBDB_29_01.raw	1924	R.APPQTQLPSGASSGTGSASATHGGAPLPGTR[.G	3	1	579.7	5.71	0.5355	2820.39	0.62392	0.84	18	(Q9Z1R2) BAT3_MOUSE Large proline-rich protein BAT3 - Mus musculus (Mouse)	Q9Z1R2	0.62392	NA
DBDB_19_02.raw	1209	R.ENASPAPGTTAEEAM*SR.G	2	1	312.4	2.274	0.317	1734.76	-	0.93	46	(Q9Z1R2) BAT3_MOUSE Large proline-rich protein BAT3 - Mus musculus (Mouse)	Q9Z1R2
DBDB_19_03.raw	2293	R.VGDPPQTLPEEPM*EVQGAER.T	2	1	365	4.326	0.5312	2195.03	-	0.99	310	(Q9Z1R2) BAT3_MOUSE Large proline-rich protein BAT3 - Mus musculus (Mouse)	Q9Z1R2
DBDB_18_03.raw	3025	R.DPGVITYDLPTPPGEK[.K	2	1	1166.9	3.301	0.3613	1702.86	-	0.84	12	(Q9Z1Q9) SYV_MOUSE Valyl-tRNA synthetase - Mus musculus (Mouse)	Q9Z1Q9	NA	NA
DBDB_22_02.raw	4207	K.IEEFLEAMLCPPR[.Y	2	1	1041.8	3.077	0.1724	1608.79	0.47366	0.97	170	(Q9Z1Q5) CLIC1_MOUSE Chloride intracellular channel protein 1 - Mus musculus (	Q9Z1Q5	0.783692	0.318826
DBDB_21_02.raw	3260	K.LAALNPESNTSGLDIFAK.F	2	1	1085.9	4.817	0.4355	1860.97	1.18283	0.97	77	(Q9Z1Q5) CLIC1_MOUSE Chloride intracellular channel protein 1 - Mus musculus (	Q9Z1Q5
DBDB_21_03.raw	3402	K.LAALNPESNTSGLDIFAK.F	2	1	1211.2	4.445	0.5172	1860.97	0.92008	0.88	16	(Q9Z1Q5) CLIC1_MOUSE Chloride intracellular channel protein 1 - Mus musculus (	Q9Z1Q5
DBDB_21_01.raw	3291	K.LAALNPESNTSGLDIFAK[.F	2	1	1731.5	4.602	0.4327	1864.97	1.22827	0.89	67	(Q9Z1Q5) CLIC1_MOUSE Chloride intracellular channel protein 1 - Mus musculus (	Q9Z1Q5
DBDB_21_03.raw	3406	K.LAALNPESNTSGLDIFAK[.F	2	1	1537.3	4.66	0.4857	1864.97	-	0.91	66	(Q9Z1Q5) CLIC1_MOUSE Chloride intracellular channel protein 1 - Mus musculus (	Q9Z1Q5
DBDB_16_01.raw	1452	K.NSNPALNDNLEK.G	2	1	558.3	2.032	0.1671	1328.64	-	0.98	153	(Q9Z1Q5) CLIC1_MOUSE Chloride intracellular channel protein 1 - Mus musculus (	Q9Z1Q5
DBDB_16_02.raw	1597	K.NSNPALNDNLEK.G	2	2	467.7	2.247	0.1743	1328.64	-	0.96	86	(Q9Z1Q5) CLIC1_MOUSE Chloride intracellular channel protein 1 - Mus musculus (	Q9Z1Q5
DBDB_16_03.raw	1459	K.NSNPALNDNLEK.G	2	1	910	2.465	0.1394	1328.64	-	0.96	39	(Q9Z1Q5) CLIC1_MOUSE Chloride intracellular channel protein 1 - Mus musculus (	Q9Z1Q5
DBDB_17_02.raw	3676	K.VLDNYLTSPLPEEVDETSAEDEGISQR.K	3	1	561.3	3.079	0.3569	3006.41	-	0.98	86	(Q9Z1Q5) CLIC1_MOUSE Chloride intracellular channel protein 1 - Mus musculus (	Q9Z1Q5
DBDB_17_01.raw	3724	K.VLDNYLTSPLPEEVDETSAEDEGISQR[.K	3	1	398.4	3.204	0.3033	3010.41	-	0.89	18	(Q9Z1Q5) CLIC1_MOUSE Chloride intracellular channel protein 1 - Mus musculus (	Q9Z1Q5
DBDB_17_02.raw	3694	K.VLDNYLTSPLPEEVDETSAEDEGISQR[.K	2	1	680.7	4.599	0.4145	3010.41	0.89051	0.98	190	(Q9Z1Q5) CLIC1_MOUSE Chloride intracellular channel protein 1 - Mus musculus (	Q9Z1Q5
DBDB_17_03.raw	3736	K.VLDNYLTSPLPEEVDETSAEDEGISQR[.K	2	1	450.7	3.556	0.245	3010.41	0.95542	0.98	173	(Q9Z1Q5) CLIC1_MOUSE Chloride intracellular channel protein 1 - Mus musculus (	Q9Z1Q5
DBDB_18_01.raw	3841	R.EEFASTCPDDEEIELAYEQVAR.A	3	1	1403.8	3.85	0.3903	2601.14	0.48469	0.93	115	(Q9Z1Q5) CLIC1_MOUSE Chloride intracellular channel protein 1 - Mus musculus (	Q9Z1Q5
DBDB_18_01.raw	3871	R.EEFASTCPDDEEIELAYEQVAR.A	2	1	939.8	4.55	0.5612	2601.14	0.4485	0.91	78	(Q9Z1Q5) CLIC1_MOUSE Chloride intracellular channel protein 1 - Mus musculus (	Q9Z1Q5
DBDB_18_03.raw	3860	R.EEFASTCPDDEEIELAYEQVAR.A	2	1	878.8	3.516	0.5543	2601.14	0.46927	0.95	20	(Q9Z1Q5) CLIC1_MOUSE Chloride intracellular channel protein 1 - Mus musculus (	Q9Z1Q5
DBDB_17_01.raw	1838	R.NWASGQDLQAK.L	2	1	1075.8	2.307	0.1951	1217.59	-	0.93	90	(Q9Z1P6) NDUA7_MOUSE NADH dehydrogenase [ubiquinone] 1 alpha subcomplex subuni	Q9Z1P6	1.12347	0.314839
DBDB_17_03.raw	1798	R.NWASGQDLQAK.L	2	1	1562.8	2.314	0.1352	1217.59	-	0.99	280	(Q9Z1P6) NDUA7_MOUSE NADH dehydrogenase [ubiquinone] 1 alpha subcomplex subuni	Q9Z1P6
DBDB_27_02.raw	1330	R.NWASGQDLQAK.L	2	1	418.9	2.865	0.304	1217.59	0.83234	0.87	35	(Q9Z1P6) NDUA7_MOUSE NADH dehydrogenase [ubiquinone] 1 alpha subcomplex subuni	Q9Z1P6
DBDB_28_01.raw	1357	R.NWASGQDLQAK.L	2	1	847.8	2.799	0.2943	1217.59	1.08048	0.8	35	(Q9Z1P6) NDUA7_MOUSE NADH dehydrogenase [ubiquinone] 1 alpha subcomplex subuni	Q9Z1P6
DBDB_28_02.raw	1273	R.NWASGQDLQAK[.L	2	2	346.8	2.322	0.1776	1221.59	1.4576	0.96	113	(Q9Z1P6) NDUA7_MOUSE NADH dehydrogenase [ubiquinone] 1 alpha subcomplex subuni	Q9Z1P6
DBDB_34_02.raw	1728	R.AIGTDEDLAHSSIR.F	2	1	1085.2	4.067	0.4607	1484.73	-	0.94	94	(Q9Z1J3) NFS1_MOUSE Cysteine desulfurase, mitochondrial precursor - Mus muscul	Q9Z1J3	0.9851	0.551048
DBDB_34_03.raw	1811	R.AIGTDEDLAHSSIR.F	2	1	1273.5	4.393	0.5007	1484.73	-	0.98	190	(Q9Z1J3) NFS1_MOUSE Cysteine desulfurase, mitochondrial precursor - Mus muscul	Q9Z1J3
DBDB_21_02.raw	4579	R.EM*SPLWEMVQDGIDLK[.S	2	1	901.1	3.496	0.314	1910.89	1.37475	0.98	169	(Q9Z1J3) NFS1_MOUSE Cysteine desulfurase, mitochondrial precursor - Mus muscul	Q9Z1J3
DBDB_21_01.raw	4913	R.EMSPLWEMVQDGIDLK[.S	2	1	976.1	2.3	0.2251	1894.9	-	0.89	3	(Q9Z1J3) NFS1_MOUSE Cysteine desulfurase, mitochondrial precursor - Mus muscul	Q9Z1J3
DBDB_22_03.raw	1743	R.FTTEEEVDYTAEK.C	2	1	908.3	3.091	0.3713	1561.69	0.59545	0.96	96	(Q9Z1J3) NFS1_MOUSE Cysteine desulfurase, mitochondrial precursor - Mus muscul	Q9Z1J3
DBDB_27_02.raw	2267	K.FNIPDLK[.V	2	1	1132.5	2.649	0.2109	850.472	0.84561	0.62	53	(Q9Z1G3) VATC1_MOUSE Vacuolar proton pump subunit C 1 - Mus musculus (Mouse)	Q9Z1G3	0.892754	0.179554
DBDB_20_01.raw	4146	K.VGTLDVLVGLSDELAK.L	2	1	1685.9	4.607	0.5384	1628.91	0.8801	0.98	305	(Q9Z1G3) VATC1_MOUSE Vacuolar proton pump subunit C 1 - Mus musculus (Mouse)	Q9Z1G3
DBDB_20_02.raw	4496	K.VGTLDVLVGLSDELAK.L	2	1	1752.8	4.668	0.4545	1628.91	0.89583	0.91	28	(Q9Z1G3) VATC1_MOUSE Vacuolar proton pump subunit C 1 - Mus musculus (Mouse)	Q9Z1G3
DBDB_20_03.raw	4639	K.VGTLDVLVGLSDELAK.L	2	1	1624.9	4.499	0.517	1628.91	0.90516	0.96	163	(Q9Z1G3) VATC1_MOUSE Vacuolar proton pump subunit C 1 - Mus musculus (Mouse)	Q9Z1G3
DBDB_20_01.raw	4160	K.VGTLDVLVGLSDELAK[.L	2	1	1142.5	3.627	0.2045	1632.91	1.30087	0.95	55	(Q9Z1G3) VATC1_MOUSE Vacuolar proton pump subunit C 1 - Mus musculus (Mouse)	Q9Z1G3
DBDB_21_03.raw	1622	R.DFQYNEEEMK.A	2	2	730	2.657	0.3142	1332.54	0.93682	0.97	166	(Q9Z1G3) VATC1_MOUSE Vacuolar proton pump subunit C 1 - Mus musculus (Mouse)	Q9Z1G3
DBDB_21_01.raw	3784	R.SSNVLSEDQDSYLCNVTLFR.K	2	1	1634.3	4.892	0.6098	2347.09	0.73615	0.92	36	(Q9Z1G3) VATC1_MOUSE Vacuolar proton pump subunit C 1 - Mus musculus (Mouse)	Q9Z1G3
DBDB_21_02.raw	3751	R.SSNVLSEDQDSYLCNVTLFR.K	2	1	1996.1	5	0.5918	2347.09	0.89118	0.94	164	(Q9Z1G3) VATC1_MOUSE Vacuolar proton pump subunit C 1 - Mus musculus (Mouse)	Q9Z1G3
DBDB_21_03.raw	3827	R.SSNVLSEDQDSYLCNVTLFR.K	2	1	2333.8	5.255	0.6171	2347.09	0.64307	0.95	149	(Q9Z1G3) VATC1_MOUSE Vacuolar proton pump subunit C 1 - Mus musculus (Mouse)	Q9Z1G3
DBDB_18_01.raw	2524	K.DVEFEVVGDSPEK.V	2	1	1066.5	2.883	0.3787	1449.67	1.22218	0.98	219	(Q9Z1F9) SAE2_MOUSE SUMO-activating enzyme subunit 2 - Mus musculus (Mouse)	Q9Z1F9	1.22218	NA
DBDB_21_02.raw	1234	K.RKLEENEAASTK[.K	2	1	1074.1	3.272	0.4659	1379.72	-	0.82	11	(Q9Z1F9) SAE2_MOUSE SUMO-activating enzyme subunit 2 - Mus musculus (Mouse)	Q9Z1F9
DBDB_20_02.raw	1340	K.EDLNCQEEEDPMNK.L	2	1	1415.1	4.565	0.2351	1750.7	1.35132	0.87	1	(Q9Z1D1) EIF3G_MOUSE Eukaryotic translation initiation factor 3 subunit G - Mu	Q9Z1D1	1.22523	0.125815
DBDB_20_03.raw	1448	K.EDLNCQEEEDPMNK[.L	2	1	1059.2	4.008	0.3543	1754.7	1.05626	0.88	62	(Q9Z1D1) EIF3G_MOUSE Eukaryotic translation initiation factor 3 subunit G - Mu	Q9Z1D1
DBDB_34_02.raw	1939	K.EKLPGELEPVQAAQSK[.T	3	1	954.1	4.736	0.4515	1727.92	1.3362	0.97	78	(Q9Z1D1) EIF3G_MOUSE Eukaryotic translation initiation factor 3 subunit G - Mu	Q9Z1D1
DBDB_18_02.raw	3903	K.GIPLPTGDTSPEPELLPGDPLPPPK[.E	2	1	554.7	3.09	0.3081	2538.34	1.23719	0.57	39	(Q9Z1D1) EIF3G_MOUSE Eukaryotic translation initiation factor 3 subunit G - Mu	Q9Z1D1
DBDB_18_03.raw	3862	K.GIPLPTGDTSPEPELLPGDPLPPPK[.E	2	1	332.3	3.003	0.347	2538.34	1.14516	0.92	60	(Q9Z1D1) EIF3G_MOUSE Eukaryotic translation initiation factor 3 subunit G - Mu	Q9Z1D1
DBDB_17_01.raw	5055	K.DYVPDTYADVIEALSNPIR[.Y	2	1	632.2	3.401	0.2679	2155.06	-	0.94	18	(Q9Z1B3) PLCB1_MOUSE 1-phosphatidylinositol-4,5-bisphosphate phosphodiesterase	Q9Z1B3	NA	NA
DBDB_23_03.raw	1555	K.LQTELEQEYQDK.F	2	1	486.4	3.87	0.3094	1523.72	-	0.85	18	(Q9Z1B3) PLCB1_MOUSE 1-phosphatidylinositol-4,5-bisphosphate phosphodiesterase	Q9Z1B3
DBDB_01_03.raw	1643	R.VMGPNFGYVTRK.L	2	1	667.6	3.395	0.3081	1368.71	-	0.94	42	(Q9Z183) PADI4_MOUSE Protein-arginine deiminase type-4 - Mus musculus (Mouse)	Q9Z183	NA	NA
DBDB_29_02.raw	1186	K.DGEQHEDLNEVAK.L	2	1	672.1	2.918	0.2644	1483.67	0.89913	0.94	11	(Q9Z0X1) AIFM1_MOUSE Apoptosis-inducing factor 1, mitochondrial precursor - Mu	Q9Z0X1	0.966293	0.14986
DBDB_22_03.raw	2709	K.ELWFSDDPNVTK[.T	2	1	1378.7	3.425	0.4811	1454.68	1.04406	0.76	5	(Q9Z0X1) AIFM1_MOUSE Apoptosis-inducing factor 1, mitochondrial precursor - Mu	Q9Z0X1
DBDB_24_03.raw	1509	K.LNDGSQITFEK.C	2	1	639.4	2.77	0.392	1251.62	1.39693	0.98	218	(Q9Z0X1) AIFM1_MOUSE Apoptosis-inducing factor 1, mitochondrial precursor - Mu	Q9Z0X1
DBDB_22_01.raw	3241	K.SQASGIEVIQLFPEK.G	2	1	1304.9	3.709	0.4525	1645.88	0.99817	0.68	2	(Q9Z0X1) AIFM1_MOUSE Apoptosis-inducing factor 1, mitochondrial precursor - Mu	Q9Z0X1
DBDB_22_02.raw	3318	K.SQASGIEVIQLFPEK.G	2	1	1130.9	3.685	0.3744	1645.88	1.04325	0.76	16	(Q9Z0X1) AIFM1_MOUSE Apoptosis-inducing factor 1, mitochondrial precursor - Mu	Q9Z0X1
DBDB_22_03.raw	3216	K.SQASGIEVIQLFPEK[.G	2	1	1617.9	4.293	0.5158	1649.88	0.79292	0.96	74	(Q9Z0X1) AIFM1_MOUSE Apoptosis-inducing factor 1, mitochondrial precursor - Mu	Q9Z0X1
DBDB_23_01.raw	3194	K.TGGLEIDSDFGGFR.V	2	1	1607.8	4.373	0.4998	1470.69	1.07163	0.97	60	(Q9Z0X1) AIFM1_MOUSE Apoptosis-inducing factor 1, mitochondrial precursor - Mu	Q9Z0X1
DBDB_23_02.raw	3114	K.TGGLEIDSDFGGFR.V	2	1	1003.8	3.34	0.1799	1470.69	-	0.98	218	(Q9Z0X1) AIFM1_MOUSE Apoptosis-inducing factor 1, mitochondrial precursor - Mu	Q9Z0X1
DBDB_23_03.raw	3164	K.TGGLEIDSDFGGFR.V	2	1	1265.8	4.13	0.4834	1470.69	0.96345	0.91	64	(Q9Z0X1) AIFM1_MOUSE Apoptosis-inducing factor 1, mitochondrial precursor - Mu	Q9Z0X1
DBDB_23_02.raw	3249	K.TGGLEIDSDFGGFR[.V	2	1	951.3	2.647	0.2769	1474.69	-	0.9	100	(Q9Z0X1) AIFM1_MOUSE Apoptosis-inducing factor 1, mitochondrial precursor - Mu	Q9Z0X1
DBDB_28_01.raw	3105	K.VETDHIVTAVGLEPNVELAK.T	2	1	1822.5	5.633	0.577	2134.14	1.16865	0.95	106	(Q9Z0X1) AIFM1_MOUSE Apoptosis-inducing factor 1, mitochondrial precursor - Mu	Q9Z0X1
DBDB_28_03.raw	3125	K.VETDHIVTAVGLEPNVELAK.T	2	1	1484.4	5.522	0.6329	2134.14	1.13916	0.97	139	(Q9Z0X1) AIFM1_MOUSE Apoptosis-inducing factor 1, mitochondrial precursor - Mu	Q9Z0X1
DBDB_28_01.raw	3124	K.VETDHIVTAVGLEPNVELAK[.T	2	1	1392.9	5.934	0.5031	2138.14	1.172	0.96	79	(Q9Z0X1) AIFM1_MOUSE Apoptosis-inducing factor 1, mitochondrial precursor - Mu	Q9Z0X1
DBDB_28_02.raw	3062	K.VETDHIVTAVGLEPNVELAK[.T	2	1	1366.5	4.935	0.5226	2138.14	1.09221	0.88	20	(Q9Z0X1) AIFM1_MOUSE Apoptosis-inducing factor 1, mitochondrial precursor - Mu	Q9Z0X1
DBDB_28_03.raw	3114	K.VETDHIVTAVGLEPNVELAK[.T	2	1	1334.9	5.452	0.4879	2138.14	1.11194	0.87	11	(Q9Z0X1) AIFM1_MOUSE Apoptosis-inducing factor 1, mitochondrial precursor - Mu	Q9Z0X1
DBDB_24_01.raw	1661	R.AIASATEGGSVPQIR.A	2	1	1349.8	4.998	0.3926	1456.78	-	0.95	107	(Q9Z0X1) AIFM1_MOUSE Apoptosis-inducing factor 1, mitochondrial precursor - Mu	Q9Z0X1
DBDB_24_02.raw	1587	R.AIASATEGGSVPQIR[.A	3	1	1148.4	4.851	0.2767	1460.78	0.97062	0.93	45	(Q9Z0X1) AIFM1_MOUSE Apoptosis-inducing factor 1, mitochondrial precursor - Mu	Q9Z0X1
DBDB_24_02.raw	1611	R.AIASATEGGSVPQIR[.A	2	1	1439.2	4.454	0.4767	1460.78	0.94321	0.87	81	(Q9Z0X1) AIFM1_MOUSE Apoptosis-inducing factor 1, mitochondrial precursor - Mu	Q9Z0X1
DBDB_24_03.raw	1679	R.AIASATEGGSVPQIR[.A	2	1	1535.9	5.109	0.4754	1460.78	0.99612	0.91	25	(Q9Z0X1) AIFM1_MOUSE Apoptosis-inducing factor 1, mitochondrial precursor - Mu	Q9Z0X1
DBDB_42_02.raw	3328	R.KVETDHIVTAVGLEPNVELAK.T	3	1	1302.2	3.684	0.2171	2262.23	0.68422	0.81	6	(Q9Z0X1) AIFM1_MOUSE Apoptosis-inducing factor 1, mitochondrial precursor - Mu	Q9Z0X1
DBDB_43_01.raw	3243	R.KVETDHIVTAVGLEPNVELAK.T	3	1	1738.4	5.187	0.4755	2262.23	0.74812	0.89	105	(Q9Z0X1) AIFM1_MOUSE Apoptosis-inducing factor 1, mitochondrial precursor - Mu	Q9Z0X1
DBDB_43_01.raw	3398	R.KVETDHIVTAVGLEPNVELAK.T	3	1	965.4	3.825	0.395	2262.23	0.78463	0.74	1	(Q9Z0X1) AIFM1_MOUSE Apoptosis-inducing factor 1, mitochondrial precursor - Mu	Q9Z0X1
DBDB_43_02.raw	3473	R.KVETDHIVTAVGLEPNVELAK.T	3	1	1295	4.778	0.3012	2262.23	0.86873	0.83	27	(Q9Z0X1) AIFM1_MOUSE Apoptosis-inducing factor 1, mitochondrial precursor - Mu	Q9Z0X1
DBDB_43_02.raw	3601	R.KVETDHIVTAVGLEPNVELAK.T	3	1	948.4	4.023	0.3324	2262.23	0.82771	0.98	92	(Q9Z0X1) AIFM1_MOUSE Apoptosis-inducing factor 1, mitochondrial precursor - Mu	Q9Z0X1
DBDB_43_03.raw	3261	R.KVETDHIVTAVGLEPNVELAK.T	3	1	1568.5	4.904	0.4555	2262.23	0.70614	0.68	18	(Q9Z0X1) AIFM1_MOUSE Apoptosis-inducing factor 1, mitochondrial precursor - Mu	Q9Z0X1
DBDB_43_03.raw	3514	R.KVETDHIVTAVGLEPNVELAK.T	3	1	1314.8	4.032	0.3451	2262.23	0.99496	0.91	92	(Q9Z0X1) AIFM1_MOUSE Apoptosis-inducing factor 1, mitochondrial precursor - Mu	Q9Z0X1
DBDB_43_03.raw	3752	R.KVETDHIVTAVGLEPNVELAK.T	3	1	363.5	3.054	0.2767	2262.23	0.93251	0.9	52	(Q9Z0X1) AIFM1_MOUSE Apoptosis-inducing factor 1, mitochondrial precursor - Mu	Q9Z0X1
DBDB_18_01.raw	5707	R.SIYFQPPSFYVSAQDLPNIENGGVAVLTGK[.K	3	1	516.9	3.623	0.1909	3215.63	-	0.98	159	(Q9Z0X1) AIFM1_MOUSE Apoptosis-inducing factor 1, mitochondrial precursor - Mu	Q9Z0X1
DBDB_23_01.raw	6398	R.SNIWVAGDAACFYDIK.L	2	1	531.3	3.51	0.3916	1829.86	1.17685	0.95	95	(Q9Z0X1) AIFM1_MOUSE Apoptosis-inducing factor 1, mitochondrial precursor - Mu	Q9Z0X1
DBDB_23_01.raw	6529	R.SNIWVAGDAACFYDIK.L	2	1	306.2	3.907	0.3599	1829.86	0.62774	0.95	133	(Q9Z0X1) AIFM1_MOUSE Apoptosis-inducing factor 1, mitochondrial precursor - Mu	Q9Z0X1
DBDB_23_01.raw	7037	R.SNIWVAGDAACFYDIK.L	2	1	312.9	4.17	0.3404	1829.86	0.62991	0.95	99	(Q9Z0X1) AIFM1_MOUSE Apoptosis-inducing factor 1, mitochondrial precursor - Mu	Q9Z0X1
DBDB_23_01.raw	7256	R.SNIWVAGDAACFYDIK.L	2	1	443	2.941	0.4102	1829.86	0.99259	0.79	148	(Q9Z0X1) AIFM1_MOUSE Apoptosis-inducing factor 1, mitochondrial precursor - Mu	Q9Z0X1
DBDB_23_01.raw	7366	R.SNIWVAGDAACFYDIK.L	2	1	544.5	3.275	0.336	1829.86	0.93787	0.97	86	(Q9Z0X1) AIFM1_MOUSE Apoptosis-inducing factor 1, mitochondrial precursor - Mu	Q9Z0X1
DBDB_23_01.raw	7497	R.SNIWVAGDAACFYDIK.L	2	1	463.7	3.057	0.4119	1829.86	0.97186	0.89	97	(Q9Z0X1) AIFM1_MOUSE Apoptosis-inducing factor 1, mitochondrial precursor - Mu	Q9Z0X1
DBDB_23_01.raw	7776	R.SNIWVAGDAACFYDIK.L	2	1	487.8	3.192	0.3127	1829.86	0.87998	0.99	218	(Q9Z0X1) AIFM1_MOUSE Apoptosis-inducing factor 1, mitochondrial precursor - Mu	Q9Z0X1
DBDB_23_01.raw	9706	R.SNIWVAGDAACFYDIK.L	2	1	460	2.992	0.3794	1829.86	0.9563	0.98	148	(Q9Z0X1) AIFM1_MOUSE Apoptosis-inducing factor 1, mitochondrial precursor - Mu	Q9Z0X1
DBDB_23_03.raw	5728	R.SNIWVAGDAACFYDIK.L	2	1	500.8	3.38	0.3965	1829.86	0.97348	0.98	39	(Q9Z0X1) AIFM1_MOUSE Apoptosis-inducing factor 1, mitochondrial precursor - Mu	Q9Z0X1
DBDB_23_03.raw	6508	R.SNIWVAGDAACFYDIK.L	2	1	383.2	3.673	0.4412	1829.86	0.92719	0.98	310	(Q9Z0X1) AIFM1_MOUSE Apoptosis-inducing factor 1, mitochondrial precursor - Mu	Q9Z0X1
DBDB_23_03.raw	6643	R.SNIWVAGDAACFYDIK.L	2	1	483.3	2.966	0.4102	1829.86	0.9405	0.78	8	(Q9Z0X1) AIFM1_MOUSE Apoptosis-inducing factor 1, mitochondrial precursor - Mu	Q9Z0X1
DBDB_23_03.raw	6795	R.SNIWVAGDAACFYDIK.L	2	1	348.9	2.716	0.3256	1829.86	0.89048	0.96	52	(Q9Z0X1) AIFM1_MOUSE Apoptosis-inducing factor 1, mitochondrial precursor - Mu	Q9Z0X1
DBDB_23_03.raw	6944	R.SNIWVAGDAACFYDIK.L	2	1	534.6	3.341	0.404	1829.86	0.89055	0.98	166	(Q9Z0X1) AIFM1_MOUSE Apoptosis-inducing factor 1, mitochondrial precursor - Mu	Q9Z0X1
DBDB_23_03.raw	7058	R.SNIWVAGDAACFYDIK.L	2	1	334.5	2.818	0.3567	1829.86	0.92174	0.89	28	(Q9Z0X1) AIFM1_MOUSE Apoptosis-inducing factor 1, mitochondrial precursor - Mu	Q9Z0X1
DBDB_23_03.raw	7211	R.SNIWVAGDAACFYDIK.L	2	1	330.6	3.082	0.2907	1829.86	0.98459	0.88	100	(Q9Z0X1) AIFM1_MOUSE Apoptosis-inducing factor 1, mitochondrial precursor - Mu	Q9Z0X1
DBDB_23_03.raw	7415	R.SNIWVAGDAACFYDIK.L	2	1	380.2	3.492	0.4465	1829.86	0.89575	0.97	143	(Q9Z0X1) AIFM1_MOUSE Apoptosis-inducing factor 1, mitochondrial precursor - Mu	Q9Z0X1
DBDB_23_03.raw	9632	R.SNIWVAGDAACFYDIK.L	2	1	492.7	3.212	0.3637	1829.86	0.99033	0.65	73	(Q9Z0X1) AIFM1_MOUSE Apoptosis-inducing factor 1, mitochondrial precursor - Mu	Q9Z0X1
DBDB_23_01.raw	4727	R.SNIWVAGDAACFYDIK[.L	2	1	552.5	2.861	0.2244	1833.86	1.09543	0.98	218	(Q9Z0X1) AIFM1_MOUSE Apoptosis-inducing factor 1, mitochondrial precursor - Mu	Q9Z0X1
DBDB_23_01.raw	6845	R.SNIWVAGDAACFYDIK[.L	2	1	484.3	2.761	0.3291	1833.86	0.95093	0.76	10	(Q9Z0X1) AIFM1_MOUSE Apoptosis-inducing factor 1, mitochondrial precursor - Mu	Q9Z0X1
DBDB_23_01.raw	7611	R.SNIWVAGDAACFYDIK[.L	2	1	375.1	2.421	0.1757	1833.86	0.97363	0.78	2	(Q9Z0X1) AIFM1_MOUSE Apoptosis-inducing factor 1, mitochondrial precursor - Mu	Q9Z0X1
DBDB_23_02.raw	7361	R.SNIWVAGDAACFYDIK[.L	2	1	389.4	2.514	0.2833	1833.86	0.99438	0.92	11	(Q9Z0X1) AIFM1_MOUSE Apoptosis-inducing factor 1, mitochondrial precursor - Mu	Q9Z0X1
DBDB_23_03.raw	5871	R.SNIWVAGDAACFYDIK[.L	2	1	435	3.202	0.3271	1833.86	1.15812	0.84	5	(Q9Z0X1) AIFM1_MOUSE Apoptosis-inducing factor 1, mitochondrial precursor - Mu	Q9Z0X1
DBDB_23_03.raw	7564	R.SNIWVAGDAACFYDIK[.L	2	1	400.3	2.742	0.1924	1833.86	1.05586	0.87	11	(Q9Z0X1) AIFM1_MOUSE Apoptosis-inducing factor 1, mitochondrial precursor - Mu	Q9Z0X1
DBDB_29_02.raw	3086	R.VLIVSEDPELPYM*RPPLSK.E	3	2	426.3	3.548	0.2875	2199.17	0.97417	0.76	30	(Q9Z0X1) AIFM1_MOUSE Apoptosis-inducing factor 1, mitochondrial precursor - Mu	Q9Z0X1
DBDB_25_01.raw	1843	R.VMGLGLSPEEK[.Q	2	1	1083	3.686	0.4613	1163.6	1.20766	0.78	5	(Q9Z0X1) AIFM1_MOUSE Apoptosis-inducing factor 1, mitochondrial precursor - Mu	Q9Z0X1
DBDB_18_01.raw	4157	K.EEDLVVWVDPLDGTK.E	2	1	1489.8	4.793	0.5595	1714.85	0.82137	0.71	62	(Q9Z0S1) BPNT1_MOUSE 3'(2'),5'-bisphosphate nucleotidase 1 - Mus musculus (Mou	Q9Z0S1	0.987099	0.132141
DBDB_18_02.raw	4176	K.EEDLVVWVDPLDGTK.E	2	1	1273.4	3.568	0.5318	1714.85	0.84688	0.98	113	(Q9Z0S1) BPNT1_MOUSE 3'(2'),5'-bisphosphate nucleotidase 1 - Mus musculus (Mou	Q9Z0S1
DBDB_18_03.raw	4130	K.EEDLVVWVDPLDGTK.E	2	1	1562.7	4.043	0.5569	1714.85	0.68272	0.98	190	(Q9Z0S1) BPNT1_MOUSE 3'(2'),5'-bisphosphate nucleotidase 1 - Mus musculus (Mou	Q9Z0S1
DBDB_50_01.raw	4101	K.KWDTCAPEVILHAVGGK.L	3	1	1181.3	3.639	0.3868	1880.98	0.79639	0.83	49	(Q9Z0S1) BPNT1_MOUSE 3'(2'),5'-bisphosphate nucleotidase 1 - Mus musculus (Mou	Q9Z0S1
DBDB_32_01.raw	1757	K.LTDIHGNALQYNK.E	2	1	1549.8	2.721	0.2898	1486.76	-	0.88	19	(Q9Z0S1) BPNT1_MOUSE 3'(2'),5'-bisphosphate nucleotidase 1 - Mus musculus (Mou	Q9Z0S1
DBDB_32_02.raw	1724	K.LTDIHGNALQYNK.E	2	1	1529.5	2.847	0.2712	1486.76	-	0.96	15	(Q9Z0S1) BPNT1_MOUSE 3'(2'),5'-bisphosphate nucleotidase 1 - Mus musculus (Mou	Q9Z0S1
DBDB_32_03.raw	1801	K.LTDIHGNALQYNK.E	2	1	1440.4	2.491	0.1671	1486.76	-	0.95	72	(Q9Z0S1) BPNT1_MOUSE 3'(2'),5'-bisphosphate nucleotidase 1 - Mus musculus (Mou	Q9Z0S1
DBDB_37_01.raw	1511	K.LTDIHGNALQYNK.E	3	1	926.5	4.341	0.4523	1486.76	0.9719	0.83	34	(Q9Z0S1) BPNT1_MOUSE 3'(2'),5'-bisphosphate nucleotidase 1 - Mus musculus (Mou	Q9Z0S1
DBDB_37_01.raw	1514	K.LTDIHGNALQYNK.E	2	1	1728	3.931	0.4607	1486.76	0.98822	0.81	28	(Q9Z0S1) BPNT1_MOUSE 3'(2'),5'-bisphosphate nucleotidase 1 - Mus musculus (Mou	Q9Z0S1
DBDB_37_02.raw	1600	K.LTDIHGNALQYNK[.E	2	1	1242.1	3.946	0.3362	1490.76	0.96089	0.85	32	(Q9Z0S1) BPNT1_MOUSE 3'(2'),5'-bisphosphate nucleotidase 1 - Mus musculus (Mou	Q9Z0S1
DBDB_37_03.raw	1499	K.LTDIHGNALQYNK[.E	3	1	866.2	4.394	0.3448	1490.76	0.95143	0.83	1	(Q9Z0S1) BPNT1_MOUSE 3'(2'),5'-bisphosphate nucleotidase 1 - Mus musculus (Mou	Q9Z0S1
DBDB_37_03.raw	1501	K.QTANVLSGACGLHR.G	2	1	498.9	3.187	0.4164	1483.75	-	0.93	9	(Q9Z0S1) BPNT1_MOUSE 3'(2'),5'-bisphosphate nucleotidase 1 - Mus musculus (Mou	Q9Z0S1
DBDB_33_01.raw	3860	K.WDTCAPEVILHAVGGK.L	3	1	1227.9	3.803	0.4433	1752.88	1.15781	0.98	217	(Q9Z0S1) BPNT1_MOUSE 3'(2'),5'-bisphosphate nucleotidase 1 - Mus musculus (Mou	Q9Z0S1
DBDB_33_02.raw	3773	K.WDTCAPEVILHAVGGK.L	3	1	1277.9	4.33	0.5164	1752.88	1.0152	0.95	72	(Q9Z0S1) BPNT1_MOUSE 3'(2'),5'-bisphosphate nucleotidase 1 - Mus musculus (Mou	Q9Z0S1
DBDB_33_03.raw	3844	K.WDTCAPEVILHAVGGK.L	3	1	1205.9	3.3693	0.3552	1752.88	0.9323	0.67	80	(Q9Z0S1) BPNT1_MOUSE 3'(2'),5'-bisphosphate nucleotidase 1 - Mus musculus (Mou	Q9Z0S1
DBDB_33_01.raw	3730	K.WDTCAPEVILHAVGGK[.L	3	1	1282.1	4.144	0.4701	1756.88	1.14269	0.58	5	(Q9Z0S1) BPNT1_MOUSE 3'(2'),5'-bisphosphate nucleotidase 1 - Mus musculus (Mou	Q9Z0S1
DBDB_33_01.raw	3734	K.WDTCAPEVILHAVGGK[.L	2	1	1697.1	5.311	0.4276	1756.88	1.00523	0.97	111	(Q9Z0S1) BPNT1_MOUSE 3'(2'),5'-bisphosphate nucleotidase 1 - Mus musculus (Mou	Q9Z0S1
DBDB_33_02.raw	3737	K.WDTCAPEVILHAVGGK[.L	2	1	2029	4.698	0.3494	1756.88	0.92349	0.92	48	(Q9Z0S1) BPNT1_MOUSE 3'(2'),5'-bisphosphate nucleotidase 1 - Mus musculus (Mou	Q9Z0S1
DBDB_33_03.raw	3679	K.WDTCAPEVILHAVGGK[.L	2	1	1221.2	4.217	0.4817	1756.88	0.96593	0.88	26	(Q9Z0S1) BPNT1_MOUSE 3'(2'),5'-bisphosphate nucleotidase 1 - Mus musculus (Mou	Q9Z0S1
DBDB_33_03.raw	3712	K.WDTCAPEVILHAVGGK[.L	3	1	1058.3	3.901	0.4128	1756.88	1.11449	0.73	49	(Q9Z0S1) BPNT1_MOUSE 3'(2'),5'-bisphosphate nucleotidase 1 - Mus musculus (Mou	Q9Z0S1
DBDB_35_03.raw	2661	R.EAYPGDVFYLHSR.L	2	1	567.9	2.739	0.3384	1553.74	-	0.75	11	(Q9Z0S1) BPNT1_MOUSE 3'(2'),5'-bisphosphate nucleotidase 1 - Mus musculus (Mou	Q9Z0S1
DBDB_38_01.raw	2119	R.NYEYYASHVPESVK.N	2	1	1473.5	4.705	0.4675	1685.78	1.07712	0.81	1	(Q9Z0S1) BPNT1_MOUSE 3'(2'),5'-bisphosphate nucleotidase 1 - Mus musculus (Mou	Q9Z0S1
DBDB_38_03.raw	2133	R.NYEYYASHVPESVK[.N	2	1	1273.1	4.686	0.4355	1689.78	1.09887	0.98	190	(Q9Z0S1) BPNT1_MOUSE 3'(2'),5'-bisphosphate nucleotidase 1 - Mus musculus (Mou	Q9Z0S1
DBDB_35_01.raw	2634	R.SHSNQLVTDCISAM*NPDTVLR.V	3	1	1739	4.644	0.4695	2374.12	-	0.9	13	(Q9Z0S1) BPNT1_MOUSE 3'(2'),5'-bisphosphate nucleotidase 1 - Mus musculus (Mou	Q9Z0S1
DBDB_35_02.raw	2683	R.SHSNQLVTDCISAM*NPDTVLR[.V	3	1	2012.6	4.602	0.3543	2378.12	-	0.96	66	(Q9Z0S1) BPNT1_MOUSE 3'(2'),5'-bisphosphate nucleotidase 1 - Mus musculus (Mou	Q9Z0S1
DBDB_35_02.raw	3534	R.SHSNQLVTDCISAMNPDTVLR.V	3	1	1899.3	5.966	0.4539	2358.13	1.2329	0.9	17	(Q9Z0S1) BPNT1_MOUSE 3'(2'),5'-bisphosphate nucleotidase 1 - Mus musculus (Mou	Q9Z0S1
DBDB_35_01.raw	3560	R.SHSNQLVTDCISAMNPDTVLR[.V	3	1	1018.5	3.541	0.1368	2362.13	0.95344	0.89	14	(Q9Z0S1) BPNT1_MOUSE 3'(2'),5'-bisphosphate nucleotidase 1 - Mus musculus (Mou	Q9Z0S1
DBDB_35_02.raw	3691	R.SHSNQLVTDCISAMNPDTVLR[.V	3	1	854.8	3.591	0.2808	2362.13	1.08981	0.63	10	(Q9Z0S1) BPNT1_MOUSE 3'(2'),5'-bisphosphate nucleotidase 1 - Mus musculus (Mou	Q9Z0S1
DBDB_21_01.raw	1194	R.LPEEPSSEDEQQPEK[.K	2	1	622.6	3.726	0.3581	1745.78	0.82428	0.97	170	(Q9Z0R4) ITSN1_MOUSE Intersectin-1 - Mus musculus (Mouse)	Q9Z0R4	0.864155	0.0563918
DBDB_21_03.raw	1189	R.LPEEPSSEDEQQPEK[.K	2	1	410.8	3.315	0.3025	1745.78	0.90403	0.63	30	(Q9Z0R4) ITSN1_MOUSE Intersectin-1 - Mus musculus (Mouse)	Q9Z0R4
DBDB_20_01.raw	1670	K.ADEVTLSEAGSTAGPAEPR.G	3	1	694.3	5.086	0.5183	1857.88	0.44435	0.6	13	(Q9Z0P4) PALM_MOUSE Paralemmin - Mus musculus (Mouse)	Q9Z0P4	0.892752	0.215703
DBDB_20_01.raw	1692	K.ADEVTLSEAGSTAGPAEPR.G	2	1	1894.9	4.569	0.5194	1857.88	0.85616	0.78	25	(Q9Z0P4) PALM_MOUSE Paralemmin - Mus musculus (Mouse)	Q9Z0P4
DBDB_20_02.raw	1777	K.ADEVTLSEAGSTAGPAEPR.G	3	1	637.7	3.976	0.4258	1857.88	-	0.93	62	(Q9Z0P4) PALM_MOUSE Paralemmin - Mus musculus (Mouse)	Q9Z0P4
DBDB_20_02.raw	1798	K.ADEVTLSEAGSTAGPAEPR.G	2	1	1883.9	4.873	0.5468	1857.88	0.69618	0.87	12	(Q9Z0P4) PALM_MOUSE Paralemmin - Mus musculus (Mouse)	Q9Z0P4
DBDB_20_03.raw	1857	K.ADEVTLSEAGSTAGPAEPR.G	3	1	829.6	4.747	0.5064	1857.88	0.74025	0.97	35	(Q9Z0P4) PALM_MOUSE Paralemmin - Mus musculus (Mouse)	Q9Z0P4
DBDB_20_03.raw	1885	K.ADEVTLSEAGSTAGPAEPR.G	2	1	2012	4.818	0.6134	1857.88	0.8109	0.85	55	(Q9Z0P4) PALM_MOUSE Paralemmin - Mus musculus (Mouse)	Q9Z0P4
DBDB_19_01.raw	1597	K.EENQTGPTTTPSDTQDLDM*K[.K	2	1	1008.1	4.59	0.5428	2227.96	1.18609	0.86	70	(Q9Z0P4) PALM_MOUSE Paralemmin - Mus musculus (Mouse)	Q9Z0P4
DBDB_19_03.raw	1590	K.EENQTGPTTTPSDTQDLDM*K[.K	2	1	553.5	3.763	0.4336	2227.96	1.13289	0.82	26	(Q9Z0P4) PALM_MOUSE Paralemmin - Mus musculus (Mouse)	Q9Z0P4
DBDB_19_01.raw	1937	K.EENQTGPTTTPSDTQDLDMK.K	2	1	841.9	5.383	0.5057	2207.96	1.06766	0.93	39	(Q9Z0P4) PALM_MOUSE Paralemmin - Mus musculus (Mouse)	Q9Z0P4
DBDB_19_02.raw	1897	K.EENQTGPTTTPSDTQDLDMK.K	2	1	999.5	5.217	0.4966	2207.96	1.01036	0.87	40	(Q9Z0P4) PALM_MOUSE Paralemmin - Mus musculus (Mouse)	Q9Z0P4
DBDB_19_03.raw	1943	K.EENQTGPTTTPSDTQDLDMK.K	2	1	706.2	4.947	0.5141	2207.96	1.022	0.97	97	(Q9Z0P4) PALM_MOUSE Paralemmin - Mus musculus (Mouse)	Q9Z0P4
DBDB_19_02.raw	1899	K.EENQTGPTTTPSDTQDLDMK[.K	2	1	1115	5.986	0.5469	2211.96	1.10909	0.96	73	(Q9Z0P4) PALM_MOUSE Paralemmin - Mus musculus (Mouse)	Q9Z0P4
DBDB_20_03.raw	3083	K.EIDVLEFGESAPAASK[.E	2	1	1752.2	4.739	0.5273	1666.82	0.80369	0.94	71	(Q9Z0P4) PALM_MOUSE Paralemmin - Mus musculus (Mouse)	Q9Z0P4
DBDB_22_02.raw	1920	K.SETLVNAQQTPLGTPK.E	2	1	895.7	4.401	0.4665	1683.89	0.72615	0.87	20	(Q9Z0P4) PALM_MOUSE Paralemmin - Mus musculus (Mouse)	Q9Z0P4
DBDB_19_01.raw	2218	R.EPAPLNGSAAELPATK[.E	2	1	542.4	2.553	0.2168	1569.82	-	0.75	69	(Q9Z0P4) PALM_MOUSE Paralemmin - Mus musculus (Mouse)	Q9Z0P4
DBDB_20_02.raw	2037	R.EPAPLNGSAAELPATK[.E	2	1	904.2	3.067	0.4008	1569.82	-	0.94	163	(Q9Z0P4) PALM_MOUSE Paralemmin - Mus musculus (Mouse)	Q9Z0P4
DBDB_20_03.raw	2126	R.EPAPLNGSAAELPATK[.E	2	1	851.6	3.135	0.4111	1569.82	-	0.89	19	(Q9Z0P4) PALM_MOUSE Paralemmin - Mus musculus (Mouse)	Q9Z0P4
DBDB_22_02.raw	2249	K.IVLTNPVCTEVGEK[.I	2	1	603.6	3.447	0.2509	1562.82	SHARED	0.78	48	(Q9Z0N1) IF2G_MOUSE Eukaryotic translation initiation factor 2 subunit 3, X-li	Q9Z0N1	1.08737	0.0327673
DBDB_21_01.raw	2371	R.SCGSSTPDEFPTDIPGTK[.G	2	1	826.4	4.729	0.5138	1899.84	1.0642	0.94	78	(Q9Z0N1) IF2G_MOUSE Eukaryotic translation initiation factor 2 subunit 3, X-li	Q9Z0N1
DBDB_21_03.raw	2401	R.SCGSSTPDEFPTDIPGTK[.G	2	1	803.4	3.893	0.5185	1899.84	1.11054	0.96	67	(Q9Z0N1) IF2G_MOUSE Eukaryotic translation initiation factor 2 subunit 3, X-li	Q9Z0N1
DBDB_33_02.raw	2205	R.SFDVNKPGCEVDDLK.G	2	1	632.6	3.18	0.5282	1722.81	SHARED	0.94	20	(Q9Z0N1) IF2G_MOUSE Eukaryotic translation initiation factor 2 subunit 3, X-li	Q9Z0N1
DBDB_16_01.raw	4606	R.DTIYPYLEEIPDPQVNWIPCDNPK.R	3	1	834.9	3.312	0.3545	2916.38	0.40833	0.93	93	(Q9Z0K8) VNN1_MOUSE Pantetheinase precursor - Mus musculus (Mouse)	Q9Z0K8	0.374575	0.0477368
DBDB_16_03.raw	4624	R.DTIYPYLEEIPDPQVNWIPCDNPK[.R	3	1	565.5	3.62	0.3547	2920.38	0.34082	0.97	127	(Q9Z0K8) VNN1_MOUSE Pantetheinase precursor - Mus musculus (Mouse)	Q9Z0K8
DBDB_31_01.raw	1683	K.EVNVSPCPTDPCQLHK.G	2	1	857.2	3.752	0.5359	1880.88	1.27836	0.69	50	(Q9Z0J0) NPC2_MOUSE Epididymal secretory protein E1 precursor - Mus musculus (	Q9Z0J0	1.18435	0.0548117
DBDB_31_01.raw	1681	K.EVNVSPCPTDPCQLHK[.G	2	1	820.6	3.303	0.2927	1884.88	1.15854	0.72	6	(Q9Z0J0) NPC2_MOUSE Epididymal secretory protein E1 precursor - Mus musculus (	Q9Z0J0
DBDB_31_02.raw	1730	K.EVNVSPCPTDPCQLHK[.G	2	1	746.7	3.227	0.3141	1884.88	1.18609	0.97	129	(Q9Z0J0) NPC2_MOUSE Epididymal secretory protein E1 precursor - Mus musculus (	Q9Z0J0
DBDB_31_03.raw	1723	K.EVNVSPCPTDPCQLHK[.G	2	1	713.9	3.166	0.3451	1884.88	1.14373	0.96	131	(Q9Z0J0) NPC2_MOUSE Epididymal secretory protein E1 precursor - Mus musculus (	Q9Z0J0
DBDB_23_03.raw	2465	R.VPFPIPEPDGCK[.S	2	1	545.7	2.557	0.251	1359.67	1.15502	0.95	105	(Q9Z0J0) NPC2_MOUSE Epididymal secretory protein E1 precursor - Mus musculus (	Q9Z0J0
DBDB_19_01.raw	4371	K.ADVVETLLQTDQSLTEAAK.E	2	1	1088.2	4.237	0.4792	2032.04	0.35142	0.96	72	(Q9Z0E6) GBP2_MOUSE Interferon-induced guanylate-binding protein 2 - Mus muscu	Q9Z0E6	0.37473	0.0329653
DBDB_19_03.raw	4356	K.ADVVETLLQTDQSLTEAAK.E	2	1	1562.2	4.766	0.4633	2032.04	0.39804	0.92	69	(Q9Z0E6) GBP2_MOUSE Interferon-induced guanylate-binding protein 2 - Mus muscu	Q9Z0E6
DBDB_20_01.raw	2263	K.LQETLSSTEEDPSEPLVQNYR.V	3	1	1871	5.034	0.5691	2435.16	0.61113	0.98	189	(Q9WVT6) CAH14_MOUSE Carbonic anhydrase 14 precursor - Mus musculus (Mouse)	Q9WVT6	1.00259	0.223139
DBDB_24_01.raw	4525	R.ELFPQQLEQFFR.Y	2	1	1030.3	3.208	0.3028	1581.81	1.14943	0.94	39	(Q9WVT6) CAH14_MOUSE Carbonic anhydrase 14 precursor - Mus musculus (Mouse)	Q9WVT6
DBDB_24_02.raw	4579	R.ELFPQQLEQFFR.Y	2	1	915.6	3.651	0.2836	1581.81	1.12116	0.83	16	(Q9WVT6) CAH14_MOUSE Carbonic anhydrase 14 precursor - Mus musculus (Mouse)	Q9WVT6
DBDB_24_03.raw	4579	R.ELFPQQLEQFFR.Y	2	1	939.8	3.552	0.3271	1581.81	1.03131	0.81	26	(Q9WVT6) CAH14_MOUSE Carbonic anhydrase 14 precursor - Mus musculus (Mouse)	Q9WVT6
DBDB_24_03.raw	4677	R.ELFPQQLEQFFR[.Y	2	1	586.8	3.642	0.4183	1585.81	1.09994	0.98	133	(Q9WVT6) CAH14_MOUSE Carbonic anhydrase 14 precursor - Mus musculus (Mouse)	Q9WVT6
DBDB_20_03.raw	1360	R.TGGPAYGPSSDPSTASETESEK[.R	2	1	785.9	4.373	0.4875	2158.93	1.18124	0.96	84	(Q9WVR4) FXR2_MOUSE Fragile X mental retardation syndrome-related protein 2 -	Q9WVR4	1.18124	NA
DBDB_22_02.raw	1822	K.SAAFTVENGSTIR.F	2	1	818.4	2.211	0.2575	1352.68	-	0.94	80	(Q9WVM8) AADAT_MOUSE Kynurenine/alpha-aminoadipate aminotransferase mitochondr	Q9WVM8	0.910013	0.036111
DBDB_22_01.raw	3906	K.TLISLAPGSPNPSMFPFK.S	2	1	323.2	3.475	0.3315	1904	0.95057	0.96	127	(Q9WVM8) AADAT_MOUSE Kynurenine/alpha-aminoadipate aminotransferase mitochondr	Q9WVM8
DBDB_22_01.raw	3916	K.TLISLAPGSPNPSMFPFK[.S	2	1	490.4	4.527	0.4363	1908	0.89584	0.73	1	(Q9WVM8) AADAT_MOUSE Kynurenine/alpha-aminoadipate aminotransferase mitochondr	Q9WVM8
DBDB_22_02.raw	3976	K.TLISLAPGSPNPSMFPFK[.S	2	1	499.9	4.038	0.3876	1908	0.86751	0.92	16	(Q9WVM8) AADAT_MOUSE Kynurenine/alpha-aminoadipate aminotransferase mitochondr	Q9WVM8
DBDB_22_03.raw	3861	K.TLISLAPGSPNPSMFPFK[.S	2	1	492.7	3.654	0.2897	1908	0.92613	0.9	126	(Q9WVM8) AADAT_MOUSE Kynurenine/alpha-aminoadipate aminotransferase mitochondr	Q9WVM8
DBDB_11_01.raw	6041	R.LLPEKDDAGLPPPK.V	2	1	719.5	2.913	0.1699	1489.83	0.95529	0.95	10	(Q9WVL6) EXTL3_MOUSE Exostosin-like 3 - Mus musculus (Mouse)	Q9WVL6	0.95529	NA
DBDB_19_01.raw	1794	R.TEEPESPESVDQTSPTPGDGNPR.E	2	1	823.1	4.229	0.2953	2426.06	0.59321	0.81	55	(Q9WVL3) S12A7_MOUSE Solute carrier family 12 member 7 - Mus musculus (Mouse)	Q9WVL3	0.651293	0.0625503
DBDB_19_01.raw	1814	R.TEEPESPESVDQTSPTPGDGNPR.E	3	1	1230.4	5.406	0.3133	2426.06	0.60124	0.91	49	(Q9WVL3) S12A7_MOUSE Solute carrier family 12 member 7 - Mus musculus (Mouse)	Q9WVL3
DBDB_19_02.raw	1770	R.TEEPESPESVDQTSPTPGDGNPR.E	2	1	777.2	3.976	0.3843	2426.06	0.70289	0.96	113	(Q9WVL3) S12A7_MOUSE Solute carrier family 12 member 7 - Mus musculus (Mouse)	Q9WVL3
DBDB_19_03.raw	1804	R.TEEPESPESVDQTSPTPGDGNPR.E	2	1	550.1	3.599	0.235	2426.06	0.70783	0.97	151	(Q9WVL3) S12A7_MOUSE Solute carrier family 12 member 7 - Mus musculus (Mouse)	Q9WVL3
DBDB_17_02.raw	2510	K.FLFHLRQLLKQLK[.E	2	1	624	2.949	0.2534	1688.04	-	0.89	2	(Q9WVL2) STAT2_MOUSE Signal transducer and activator of transcription 2 - Mus	Q9WVL2	NA	NA
DBDB_19_01.raw	3803	K.DGGQQFTEEFQTLNPMK.Q	2	1	1270.6	4.254	0.3033	1969.9	0.9279	0.92	41	(Q9WVL0) MAAI_MOUSE Maleylacetoacetate isomerase - Mus musculus (Mouse)	Q9WVL0	0.96327	0.247523
DBDB_19_03.raw	3817	K.DGGQQFTEEFQTLNPMK[.Q	2	1	1497	4.151	0.3809	1973.9	0.95306	0.96	111	(Q9WVL0) MAAI_MOUSE Maleylacetoacetate isomerase - Mus musculus (Mouse)	Q9WVL0
DBDB_22_03.raw	3896	K.GIDYEIVPINLIK.D	2	1	784.2	3.04	0.3864	1486.85	1.40408	0.81	4	(Q9WVL0) MAAI_MOUSE Maleylacetoacetate isomerase - Mus musculus (Mouse)	Q9WVL0
DBDB_22_02.raw	3995	K.GIDYEIVPINLIK[.D	2	1	803.5	2.275	0.1404	1490.85	1.23743	0.87	10	(Q9WVL0) MAAI_MOUSE Maleylacetoacetate isomerase - Mus musculus (Mouse)	Q9WVL0
DBDB_33_01.raw	2407	K.VDLSPYPTISHINK[.E	2	1	742.2	3.944	0.404	1587.84	1.14424	0.88	29	(Q9WVL0) MAAI_MOUSE Maleylacetoacetate isomerase - Mus musculus (Mouse)	Q9WVL0
DBDB_33_03.raw	2362	K.VDLSPYPTISHINK[.E	2	1	821.5	4.112	0.4032	1587.84	1.06573	0.9	85	(Q9WVL0) MAAI_MOUSE Maleylacetoacetate isomerase - Mus musculus (Mouse)	Q9WVL0
DBDB_19_03.raw	3520	K.YCVGDEVSM*ADVCLVPQVANAER.F	2	1	732.3	5.12	0.5689	2598.18	0.65082	0.82	14	(Q9WVL0) MAAI_MOUSE Maleylacetoacetate isomerase - Mus musculus (Mouse)	Q9WVL0
DBDB_19_02.raw	3505	K.YCVGDEVSM*ADVCLVPQVANAER[.F	2	1	326.7	3.449	0.2447	2602.18	0.70538	0.94	174	(Q9WVL0) MAAI_MOUSE Maleylacetoacetate isomerase - Mus musculus (Mouse)	Q9WVL0
DBDB_20_01.raw	4421	R.M*ISDLIASGIQPLQNLSVLK.Q	2	1	1136.5	3.87	0.5926	2156.2	-	0.96	128	(Q9WVL0) MAAI_MOUSE Maleylacetoacetate isomerase - Mus musculus (Mouse)	Q9WVL0
DBDB_20_01.raw	4584	R.MISDLIASGIQPLQNLSVLK.Q	2	1	2053.2	4.169	0.4639	2140.2	-	0.96	35	(Q9WVL0) MAAI_MOUSE Maleylacetoacetate isomerase - Mus musculus (Mouse)	Q9WVL0
DBDB_20_01.raw	4551	R.MISDLIASGIQPLQNLSVLK[.Q	3	1	1498.7	4.684	0.3804	2144.2	0.76697	0.97	89	(Q9WVL0) MAAI_MOUSE Maleylacetoacetate isomerase - Mus musculus (Mouse)	Q9WVL0
DBDB_20_02.raw	4884	R.MISDLIASGIQPLQNLSVLK[.Q	2	1	2030.8	5.13	0.5637	2144.2	-	0.94	65	(Q9WVL0) MAAI_MOUSE Maleylacetoacetate isomerase - Mus musculus (Mouse)	Q9WVL0
DBDB_20_02.raw	4900	R.MISDLIASGIQPLQNLSVLK[.Q	3	1	1256.7	4.783	0.4104	2144.2	-	0.91	18	(Q9WVL0) MAAI_MOUSE Maleylacetoacetate isomerase - Mus musculus (Mouse)	Q9WVL0
DBDB_20_03.raw	5014	R.MISDLIASGIQPLQNLSVLK[.Q	2	1	1838.7	4.993	0.5824	2144.2	0.77709	0.96	190	(Q9WVL0) MAAI_MOUSE Maleylacetoacetate isomerase - Mus musculus (Mouse)	Q9WVL0
DBDB_20_03.raw	5145	R.MISDLIASGIQPLQNLSVLK[.Q	2	1	751.7	3.012	0.3674	2144.2	-	0.93	6	(Q9WVL0) MAAI_MOUSE Maleylacetoacetate isomerase - Mus musculus (Mouse)	Q9WVL0
DBDB_26_02.raw	4265	K.DGLLDDEEFALANHLIK.V	2	1	1053.6	4.993	0.5165	1912.97	1.07942	0.66	35	(Q9WVK4) EHD1_MOUSE EH domain-containing protein 1 - Mus musculus (Mouse)	Q9WVK4	1.12641	0.41084
DBDB_26_03.raw	4260	K.DGLLDDEEFALANHLIK.V	2	1	1929	5.177	0.5246	1912.97	1.04241	0.98	66	(Q9WVK4) EHD1_MOUSE EH domain-containing protein 1 - Mus musculus (Mouse)	Q9WVK4
DBDB_26_01.raw	4283	K.DGLLDDEEFALANHLIK[.V	2	1	2091.7	4.983	0.3674	1916.97	1.11605	0.89	5	(Q9WVK4) EHD1_MOUSE EH domain-containing protein 1 - Mus musculus (Mouse)	Q9WVK4
DBDB_26_02.raw	4260	K.DGLLDDEEFALANHLIK[.V	2	1	1747.9	4.943	0.4341	1916.97	0.96667	0.97	147	(Q9WVK4) EHD1_MOUSE EH domain-containing protein 1 - Mus musculus (Mouse)	Q9WVK4
DBDB_26_03.raw	4286	K.DGLLDDEEFALANHLIK[.V	2	1	1926.1	4.925	0.4117	1916.97	0.90548	0.78	35	(Q9WVK4) EHD1_MOUSE EH domain-containing protein 1 - Mus musculus (Mouse)	Q9WVK4
DBDB_27_01.raw	3831	K.DKPTYDEIFYTLSPVNGK.I	2	1	1365.6	3.396	0.4531	2087.03	-	0.84	27	(Q9WVK4) EHD1_MOUSE EH domain-containing protein 1 - Mus musculus (Mouse)	Q9WVK4
DBDB_27_02.raw	3910	K.DKPTYDEIFYTLSPVNGK.I	2	1	683.6	3.583	0.4037	2087.03	-	0.97	133	(Q9WVK4) EHD1_MOUSE EH domain-containing protein 1 - Mus musculus (Mouse)	Q9WVK4
DBDB_27_03.raw	3840	K.DKPTYDEIFYTLSPVNGK.I	2	1	1591.9	3.601	0.4307	2087.03	-	0.8	64	(Q9WVK4) EHD1_MOUSE EH domain-containing protein 1 - Mus musculus (Mouse)	Q9WVK4
DBDB_24_01.raw	2357	K.ELVNNLGEIYQK[.I	2	1	1207.9	3.378	0.2174	1423.75	2.22786	0.8	26	(Q9WVK4) EHD1_MOUSE EH domain-containing protein 1 - Mus musculus (Mouse)	Q9WVK4
DBDB_24_01.raw	4294	K.GGAFDGTM*NGPFGHGYGEGAGEGIDDVEWVVGK[.D	3	1	505	4.683	0.4861	3302.44	-	0.81	2	(Q9WVK4) EHD1_MOUSE EH domain-containing protein 1 - Mus musculus (Mouse)	Q9WVK4
DBDB_24_01.raw	4449	K.GGAFDGTMNGPFGHGYGEGAGEGIDDVEWVVGK[.D	3	1	801.5	3.751	0.3214	3286.44	-	0.98	103	(Q9WVK4) EHD1_MOUSE EH domain-containing protein 1 - Mus musculus (Mouse)	Q9WVK4
DBDB_24_03.raw	4515	K.GGAFDGTMNGPFGHGYGEGAGEGIDDVEWVVGK[.D	3	1	1244.3	3.226	0.3862	3286.44	-	0.8	2	(Q9WVK4) EHD1_MOUSE EH domain-containing protein 1 - Mus musculus (Mouse)	Q9WVK4
DBDB_35_03.raw	4347	K.LADVDKDGLLDDEEFALANHLIK[.V	3	1	2488.7	5.365	0.4388	2558.3	-	0.94	20	(Q9WVK4) EHD1_MOUSE EH domain-containing protein 1 - Mus musculus (Mouse)	Q9WVK4
DBDB_21_01.raw	3732	K.LDISDEFSEVIK[.A	2	1	1109.3	3.364	0.5717	1398.7	SHARED	0.97	20	(Q9WVK4) EHD1_MOUSE EH domain-containing protein 1 - Mus musculus (Mouse)	Q9WVK4
DBDB_21_03.raw	3792	K.LDISDEFSEVIK[.A	2	1	1158.6	3.057	0.5969	1398.7	SHARED	0.81	25	(Q9WVK4) EHD1_MOUSE EH domain-containing protein 1 - Mus musculus (Mouse)	Q9WVK4
DBDB_20_02.raw	3711	K.LLDTVDDMLANDIAR.L	2	1	2873.3	4.988	0.4546	1674.84	0.66492	0.94	53	(Q9WVK4) EHD1_MOUSE EH domain-containing protein 1 - Mus musculus (Mouse)	Q9WVK4
DBDB_20_03.raw	3814	K.LLDTVDDMLANDIAR.L	2	1	2750.8	4.9	0.5179	1674.84	0.59493	0.81	27	(Q9WVK4) EHD1_MOUSE EH domain-containing protein 1 - Mus musculus (Mouse)	Q9WVK4
DBDB_40_02.raw	2210	R.EHQISSGDFPSLR[.K	2	1	722.5	3.845	0.4012	1476.71	1.15731	0.98	75	(Q9WVK4) EHD1_MOUSE EH domain-containing protein 1 - Mus musculus (Mouse)	Q9WVK4
DBDB_42_02.raw	1654	R.HLIEQDFPGM*R.I	2	1	438.1	2.547	0.2864	1358.65	1.35132	0.88	2	(Q9WVK4) EHD1_MOUSE EH domain-containing protein 1 - Mus musculus (Mouse)	Q9WVK4
DBDB_42_01.raw	1757	R.HLIEQDFPGM*R[.I	2	1	562	3.025	0.3572	1362.65	1.19163	0.91	99	(Q9WVK4) EHD1_MOUSE EH domain-containing protein 1 - Mus musculus (Mouse)	Q9WVK4
DBDB_42_03.raw	1769	R.HLIEQDFPGM*R[.I	2	1	736.7	3.141	0.3684	1362.65	1.2189	0.85	47	(Q9WVK4) EHD1_MOUSE EH domain-containing protein 1 - Mus musculus (Mouse)	Q9WVK4
DBDB_24_03.raw	2432	R.LGLLVDTVGPR.L	2	1	1534.2	3.967	0.4832	1139.68	1.15364	0.93	10	(Q9WVJ3) PGCP_MOUSE Plasma glutamate carboxypeptidase precursor - Mus musculus	Q9WVJ3	1.15364	NA
DBDB_27_01.raw	2106	K.AYAQQLTEWAR.R	2	1	2001.1	3.72	0.4119	1336.66	0.7315	0.82	55	(Q9WVE8) PACN2_MOUSE Protein kinase C and casein kinase substrate in neurons p	Q9WVE8	0.895705	0.163362
DBDB_27_02.raw	2188	K.AYAQQLTEWAR.R	2	1	1897.9	3.857	0.3862	1336.66	0.89087	0.85	55	(Q9WVE8) PACN2_MOUSE Protein kinase C and casein kinase substrate in neurons p	Q9WVE8
DBDB_27_03.raw	2187	K.AYAQQLTEWAR.R	2	1	1688.6	3.759	0.3942	1336.66	0.71376	0.95	1	(Q9WVE8) PACN2_MOUSE Protein kinase C and casein kinase substrate in neurons p	Q9WVE8
DBDB_27_02.raw	2197	K.AYAQQLTEWAR[.R	2	1	1380.1	3.848	0.3985	1340.66	0.76034	0.72	66	(Q9WVE8) PACN2_MOUSE Protein kinase C and casein kinase substrate in neurons p	Q9WVE8
DBDB_41_01.raw	1983	K.HLDLSNVASYK.T	2	1	756.5	2.929	0.5204	1246.64	0.88387	0.86	36	(Q9WVE8) PACN2_MOUSE Protein kinase C and casein kinase substrate in neurons p	Q9WVE8
DBDB_41_02.raw	2039	K.HLDLSNVASYK.T	2	1	626	2.784	0.5493	1246.64	0.96468	0.77	36	(Q9WVE8) PACN2_MOUSE Protein kinase C and casein kinase substrate in neurons p	Q9WVE8
DBDB_41_03.raw	1933	K.HLDLSNVASYK.T	2	1	759.6	3.406	0.4399	1246.64	-	0.97	8	(Q9WVE8) PACN2_MOUSE Protein kinase C and casein kinase substrate in neurons p	Q9WVE8
DBDB_42_02.raw	1925	K.HLDLSNVASYK.T	2	1	770.4	3.108	0.5291	1246.64	1.18577	0.92	43	(Q9WVE8) PACN2_MOUSE Protein kinase C and casein kinase substrate in neurons p	Q9WVE8
DBDB_42_03.raw	2083	K.HLDLSNVASYK.T	2	1	332.8	2.254	0.2972	1246.64	1.03485	0.63	30	(Q9WVE8) PACN2_MOUSE Protein kinase C and casein kinase substrate in neurons p	Q9WVE8
DBDB_22_02.raw	1559	K.ENTPSEANLQEEEVR.T	2	1	963.2	4.338	0.5489	1744.8	0.99007	0.96	61	(Q9WVB0) RBPMS_MOUSE RNA-binding protein with multiple splicing - Mus musculus	Q9WVB0	0.99007	NA
DBDB_21_01.raw	2341	K.LINSLYPEGQAPVK.K	2	1	856.7	2.832	0.2158	1528.84	-	0.86	56	(Q9WVA4) TAGL2_MOUSE Transgelin-2 - Mus musculus (Mouse)	Q9WVA4	0.902788	0.27057
DBDB_21_02.raw	2291	K.LINSLYPEGQAPVK.K	2	1	981.2	2.9	0.2999	1528.84	-	0.79	25	(Q9WVA4) TAGL2_MOUSE Transgelin-2 - Mus musculus (Mouse)	Q9WVA4
DBDB_23_01.raw	2025	K.LINSLYPEGQAPVK.K	2	1	1428.1	4.38	0.4901	1528.84	0.9742	0.98	147	(Q9WVA4) TAGL2_MOUSE Transgelin-2 - Mus musculus (Mouse)	Q9WVA4
DBDB_23_03.raw	2004	K.LINSLYPEGQAPVK.K	2	1	1255.2	4.548	0.4688	1528.84	1.06821	0.97	187	(Q9WVA4) TAGL2_MOUSE Transgelin-2 - Mus musculus (Mouse)	Q9WVA4
DBDB_23_01.raw	2046	K.LINSLYPEGQAPVK[.K	2	1	935	3.695	0.4178	1532.84	1.16305	0.78	47	(Q9WVA4) TAGL2_MOUSE Transgelin-2 - Mus musculus (Mouse)	Q9WVA4
DBDB_27_03.raw	1685	K.NVIGLQMGTNR[.G	2	1	1254.3	3.003	0.4079	1206.63	1.26404	0.95	47	(Q9WVA4) TAGL2_MOUSE Transgelin-2 - Mus musculus (Mouse)	Q9WVA4
DBDB_05_01.raw	3807	K.QMEQISQFLQAAER.Y	2	1	1434.2	3.743	0.4422	1678.82	-	0.97	90	(Q9WVA4) TAGL2_MOUSE Transgelin-2 - Mus musculus (Mouse)	Q9WVA4
DBDB_05_02.raw	3790	K.QMEQISQFLQAAER.Y	2	1	1196.3	3.372	0.4424	1678.82	-	0.73	25	(Q9WVA4) TAGL2_MOUSE Transgelin-2 - Mus musculus (Mouse)	Q9WVA4
DBDB_06_01.raw	3718	K.QMEQISQFLQAAER.Y	2	1	686.6	2.446	0.4216	1678.82	-	0.91	26	(Q9WVA4) TAGL2_MOUSE Transgelin-2 - Mus musculus (Mouse)	Q9WVA4
DBDB_06_02.raw	3782	K.QMEQISQFLQAAER.Y	2	1	1227.3	3.427	0.4181	1678.82	-	0.81	2	(Q9WVA4) TAGL2_MOUSE Transgelin-2 - Mus musculus (Mouse)	Q9WVA4
DBDB_06_03.raw	3799	K.QMEQISQFLQAAER.Y	2	1	2516	4.984	0.5005	1678.82	-	0.61	73	(Q9WVA4) TAGL2_MOUSE Transgelin-2 - Mus musculus (Mouse)	Q9WVA4
DBDB_06_03.raw	3758	K.QMEQISQFLQAAER[.Y	2	1	652.7	3.956	0.3815	1682.82	-	0.94	74	(Q9WVA4) TAGL2_MOUSE Transgelin-2 - Mus musculus (Mouse)	Q9WVA4
DBDB_15_02.raw	3875	R.DDGLFSGDPNWFPK.K	2	1	587.3	3.181	0.3264	1594.72	-	0.98	27	(Q9WVA4) TAGL2_MOUSE Transgelin-2 - Mus musculus (Mouse)	Q9WVA4
DBDB_15_02.raw	3987	R.DDGLFSGDPNWFPK.K	2	1	491.3	3.295	0.4002	1594.72	-	0.98	122	(Q9WVA4) TAGL2_MOUSE Transgelin-2 - Mus musculus (Mouse)	Q9WVA4
DBDB_15_03.raw	4042	R.DDGLFSGDPNWFPK.K	2	2	368.5	2.331	0.2717	1594.72	-	0.98	204	(Q9WVA4) TAGL2_MOUSE Transgelin-2 - Mus musculus (Mouse)	Q9WVA4
DBDB_15_01.raw	3874	R.DDGLFSGDPNWFPK[.K	2	1	692.5	2.979	0.3475	1598.72	-	0.92	80	(Q9WVA4) TAGL2_MOUSE Transgelin-2 - Mus musculus (Mouse)	Q9WVA4
DBDB_19_01.raw	3963	R.DDGLFSGDPNWFPK[.K	3	1	811	3.052	0.3699	1598.72	-	0.86	18	(Q9WVA4) TAGL2_MOUSE Transgelin-2 - Mus musculus (Mouse)	Q9WVA4
DBDB_19_01.raw	4195	R.DDGLFSGDPNWFPK[.K	2	1	1276.9	4.25	0.4498	1598.72	0.85064	0.95	120	(Q9WVA4) TAGL2_MOUSE Transgelin-2 - Mus musculus (Mouse)	Q9WVA4
DBDB_19_02.raw	3916	R.DDGLFSGDPNWFPK[.K	2	1	675.5	2.875	0.2338	1598.72	-	0.74	57	(Q9WVA4) TAGL2_MOUSE Transgelin-2 - Mus musculus (Mouse)	Q9WVA4
DBDB_19_02.raw	3918	R.DDGLFSGDPNWFPK[.K	3	1	1093.5	3.826	0.4245	1598.72	-	0.94	138	(Q9WVA4) TAGL2_MOUSE Transgelin-2 - Mus musculus (Mouse)	Q9WVA4
DBDB_19_02.raw	4049	R.DDGLFSGDPNWFPK[.K	2	1	1007.7	3.641	0.3629	1598.72	1.66309	0.92	89	(Q9WVA4) TAGL2_MOUSE Transgelin-2 - Mus musculus (Mouse)	Q9WVA4
DBDB_19_03.raw	3934	R.DDGLFSGDPNWFPK[.K	3	1	1500.7	3.383	0.4033	1598.72	-	0.97	159	(Q9WVA4) TAGL2_MOUSE Transgelin-2 - Mus musculus (Mouse)	Q9WVA4
DBDB_16_01.raw	1471	R.NFSDNQLQEGK.N	2	1	1606.9	2.634	0.2481	1279.59	-	0.47	29	(Q9WVA4) TAGL2_MOUSE Transgelin-2 - Mus musculus (Mouse)	Q9WVA4
DBDB_16_02.raw	1504	R.NFSDNQLQEGK.N	2	1	1638.5	2.858	0.2044	1279.59	-	0.98	146	(Q9WVA4) TAGL2_MOUSE Transgelin-2 - Mus musculus (Mouse)	Q9WVA4
DBDB_16_03.raw	1510	R.NFSDNQLQEGK.N	2	1	1613.7	2.656	0.2947	1279.59	-	0.96	70	(Q9WVA4) TAGL2_MOUSE Transgelin-2 - Mus musculus (Mouse)	Q9WVA4
DBDB_25_02.raw	1172	R.NFSDNQLQEGK.N	2	2	424.8	2.687	0.2841	1279.59	1.03383	0.92	52	(Q9WVA4) TAGL2_MOUSE Transgelin-2 - Mus musculus (Mouse)	Q9WVA4
DBDB_26_02.raw	1079	R.NFSDNQLQEGK.N	2	1	689.4	3.096	0.3155	1279.59	1.13997	0.86	20	(Q9WVA4) TAGL2_MOUSE Transgelin-2 - Mus musculus (Mouse)	Q9WVA4
DBDB_26_01.raw	1155	R.NFSDNQLQEGK[.N	2	1	675	2.749	0.3212	1283.59	1.08079	0.84	20	(Q9WVA4) TAGL2_MOUSE Transgelin-2 - Mus musculus (Mouse)	Q9WVA4
DBDB_25_03.raw	1921	R.TLM*NLGGLAVAR[.D	2	1	1052.3	2.748	0.2728	1235.68	0.75254	0.71	9	(Q9WVA4) TAGL2_MOUSE Transgelin-2 - Mus musculus (Mouse)	Q9WVA4
DBDB_25_02.raw	2715	R.TLMNLGGLAVAR.D	2	1	809.8	2.863	0.3179	1215.69	-	0.95	92	(Q9WVA4) TAGL2_MOUSE Transgelin-2 - Mus musculus (Mouse)	Q9WVA4
DBDB_25_03.raw	2629	R.TLMNLGGLAVAR.D	2	1	1414.5	3.722	0.3699	1215.69	0.68961	0.7	26	(Q9WVA4) TAGL2_MOUSE Transgelin-2 - Mus musculus (Mouse)	Q9WVA4
DBDB_25_01.raw	2637	R.TLMNLGGLAVAR[.D	2	1	888.6	2.983	0.2213	1219.69	0.6326	0.95	130	(Q9WVA4) TAGL2_MOUSE Transgelin-2 - Mus musculus (Mouse)	Q9WVA4
DBDB_25_03.raw	2622	R.TLMNLGGLAVAR[.D	2	1	936	3.313	0.3345	1219.69	0.76106	0.95	10	(Q9WVA4) TAGL2_MOUSE Transgelin-2 - Mus musculus (Mouse)	Q9WVA4
DBDB_21_01.raw	4816	R.YGINTTDIFQTVDLWEGK.N	2	1	2258.5	5.69	0.4517	2100.03	-	0.96	105	(Q9WVA4) TAGL2_MOUSE Transgelin-2 - Mus musculus (Mouse)	Q9WVA4
DBDB_21_01.raw	4829	R.YGINTTDIFQTVDLWEGK.N	2	1	3248.3	5.58	0.5498	2100.03	0.83706	0.92	29	(Q9WVA4) TAGL2_MOUSE Transgelin-2 - Mus musculus (Mouse)	Q9WVA4
DBDB_21_01.raw	5209	R.YGINTTDIFQTVDLWEGK.N	2	1	1567.8	4.562	0.5246	2100.03	0.87099	0.9	43	(Q9WVA4) TAGL2_MOUSE Transgelin-2 - Mus musculus (Mouse)	Q9WVA4
DBDB_21_01.raw	5481	R.YGINTTDIFQTVDLWEGK.N	2	1	929.4	3.948	0.5713	2100.03	0.56648	0.95	110	(Q9WVA4) TAGL2_MOUSE Transgelin-2 - Mus musculus (Mouse)	Q9WVA4
DBDB_21_01.raw	6920	R.YGINTTDIFQTVDLWEGK.N	2	1	427.5	3.523	0.5111	2100.03	0.88425	0.96	85	(Q9WVA4) TAGL2_MOUSE Transgelin-2 - Mus musculus (Mouse)	Q9WVA4
DBDB_21_01.raw	7808	R.YGINTTDIFQTVDLWEGK.N	2	1	725	3.459	0.466	2100.03	0.86676	0.84	1	(Q9WVA4) TAGL2_MOUSE Transgelin-2 - Mus musculus (Mouse)	Q9WVA4
DBDB_21_01.raw	8108	R.YGINTTDIFQTVDLWEGK.N	2	1	534.3	3.055	0.3786	2100.03	0.90474	0.78	27	(Q9WVA4) TAGL2_MOUSE Transgelin-2 - Mus musculus (Mouse)	Q9WVA4
DBDB_21_01.raw	8317	R.YGINTTDIFQTVDLWEGK.N	2	1	368.3	2.971	0.4146	2100.03	0.91476	0.5	29	(Q9WVA4) TAGL2_MOUSE Transgelin-2 - Mus musculus (Mouse)	Q9WVA4
DBDB_21_01.raw	8874	R.YGINTTDIFQTVDLWEGK.N	2	1	305.2	2.961	0.279	2100.03	0.87602	0.89	40	(Q9WVA4) TAGL2_MOUSE Transgelin-2 - Mus musculus (Mouse)	Q9WVA4
DBDB_21_01.raw	9948	R.YGINTTDIFQTVDLWEGK.N	2	1	379.6	3.434	0.5194	2100.03	0.86726	0.51	21	(Q9WVA4) TAGL2_MOUSE Transgelin-2 - Mus musculus (Mouse)	Q9WVA4
DBDB_21_02.raw	4716	R.YGINTTDIFQTVDLWEGK.N	2	1	1974.1	5.265	0.4501	2100.03	0.64853	0.96	139	(Q9WVA4) TAGL2_MOUSE Transgelin-2 - Mus musculus (Mouse)	Q9WVA4
DBDB_21_02.raw	5168	R.YGINTTDIFQTVDLWEGK.N	2	1	1027.3	4.072	0.5137	2100.03	0.78178	0.96	147	(Q9WVA4) TAGL2_MOUSE Transgelin-2 - Mus musculus (Mouse)	Q9WVA4
DBDB_21_02.raw	5542	R.YGINTTDIFQTVDLWEGK.N	2	1	338.3	2.659	0.3551	2100.03	0.49706	0.95	30	(Q9WVA4) TAGL2_MOUSE Transgelin-2 - Mus musculus (Mouse)	Q9WVA4
DBDB_21_02.raw	5672	R.YGINTTDIFQTVDLWEGK.N	2	1	466.9	3.15	0.4428	2100.03	0.48592	0.81	29	(Q9WVA4) TAGL2_MOUSE Transgelin-2 - Mus musculus (Mouse)	Q9WVA4
DBDB_21_02.raw	5991	R.YGINTTDIFQTVDLWEGK.N	2	1	975.9	3.881	0.5274	2100.03	0.75699	0.95	79	(Q9WVA4) TAGL2_MOUSE Transgelin-2 - Mus musculus (Mouse)	Q9WVA4
DBDB_21_02.raw	6229	R.YGINTTDIFQTVDLWEGK.N	2	1	763	4.172	0.5548	2100.03	0.84179	0.88	76	(Q9WVA4) TAGL2_MOUSE Transgelin-2 - Mus musculus (Mouse)	Q9WVA4
DBDB_21_02.raw	7281	R.YGINTTDIFQTVDLWEGK.N	2	1	507.8	3.357	0.4397	2100.03	0.71941	0.8	2	(Q9WVA4) TAGL2_MOUSE Transgelin-2 - Mus musculus (Mouse)	Q9WVA4
DBDB_21_02.raw	7576	R.YGINTTDIFQTVDLWEGK.N	2	1	376.7	2.258	0.2625	2100.03	0.72514	0.85	34	(Q9WVA4) TAGL2_MOUSE Transgelin-2 - Mus musculus (Mouse)	Q9WVA4
DBDB_21_03.raw	4822	R.YGINTTDIFQTVDLWEGK.N	2	1	2531.2	5.555	0.5447	2100.03	0.78774	0.95	38	(Q9WVA4) TAGL2_MOUSE Transgelin-2 - Mus musculus (Mouse)	Q9WVA4
DBDB_21_03.raw	5903	R.YGINTTDIFQTVDLWEGK.N	2	1	654.7	3.692	0.4702	2100.03	0.75867	0.67	52	(Q9WVA4) TAGL2_MOUSE Transgelin-2 - Mus musculus (Mouse)	Q9WVA4
DBDB_21_03.raw	7905	R.YGINTTDIFQTVDLWEGK.N	2	1	450.5	3.195	0.4358	2100.03	0.80526	0.95	191	(Q9WVA4) TAGL2_MOUSE Transgelin-2 - Mus musculus (Mouse)	Q9WVA4
DBDB_21_01.raw	4685	R.YGINTTDIFQTVDLWEGK[.N	2	1	1129.3	4.56	0.577	2104.03	-	0.86	45	(Q9WVA4) TAGL2_MOUSE Transgelin-2 - Mus musculus (Mouse)	Q9WVA4
DBDB_21_01.raw	4948	R.YGINTTDIFQTVDLWEGK[.N	2	1	810	4.095	0.3922	2104.03	1.79752	0.98	221	(Q9WVA4) TAGL2_MOUSE Transgelin-2 - Mus musculus (Mouse)	Q9WVA4
DBDB_21_01.raw	6086	R.YGINTTDIFQTVDLWEGK[.N	2	2	430	2.776	0.2072	2104.03	0.88686	0.92	113	(Q9WVA4) TAGL2_MOUSE Transgelin-2 - Mus musculus (Mouse)	Q9WVA4
DBDB_21_01.raw	8532	R.YGINTTDIFQTVDLWEGK[.N	2	1	323.1	3.351	0.4361	2104.03	-	0.95	13	(Q9WVA4) TAGL2_MOUSE Transgelin-2 - Mus musculus (Mouse)	Q9WVA4
DBDB_21_02.raw	4845	R.YGINTTDIFQTVDLWEGK[.N	2	1	1533.4	5.622	0.4951	2104.03	0.73596	0.95	5	(Q9WVA4) TAGL2_MOUSE Transgelin-2 - Mus musculus (Mouse)	Q9WVA4
DBDB_21_02.raw	4995	R.YGINTTDIFQTVDLWEGK[.N	2	1	1442.5	3.904	0.3844	2104.03	1.02646	0.79	54	(Q9WVA4) TAGL2_MOUSE Transgelin-2 - Mus musculus (Mouse)	Q9WVA4
DBDB_21_02.raw	7440	R.YGINTTDIFQTVDLWEGK[.N	2	1	577.4	3.406	0.4511	2104.03	0.75594	0.67	9	(Q9WVA4) TAGL2_MOUSE Transgelin-2 - Mus musculus (Mouse)	Q9WVA4
DBDB_21_03.raw	4689	R.YGINTTDIFQTVDLWEGK[.N	2	1	1603.8	4.992	0.6118	2104.03	-	0.95	54	(Q9WVA4) TAGL2_MOUSE Transgelin-2 - Mus musculus (Mouse)	Q9WVA4
DBDB_21_03.raw	4827	R.YGINTTDIFQTVDLWEGK[.N	2	1	1967.1	6.573	0.5506	2104.03	0.7686	0.98	148	(Q9WVA4) TAGL2_MOUSE Transgelin-2 - Mus musculus (Mouse)	Q9WVA4
DBDB_21_03.raw	4864	R.YGINTTDIFQTVDLWEGK[.N	3	2	469.5	3.903	0.465	2104.03	1.03698	0.97	81	(Q9WVA4) TAGL2_MOUSE Transgelin-2 - Mus musculus (Mouse)	Q9WVA4
DBDB_21_03.raw	4960	R.YGINTTDIFQTVDLWEGK[.N	2	1	1450.4	4.836	0.3982	2104.03	1.49171	0.86	55	(Q9WVA4) TAGL2_MOUSE Transgelin-2 - Mus musculus (Mouse)	Q9WVA4
DBDB_21_03.raw	8635	R.YGINTTDIFQTVDLWEGK[.N	2	1	377.3	3.041	0.3753	2104.03	0.94684	0.98	183	(Q9WVA4) TAGL2_MOUSE Transgelin-2 - Mus musculus (Mouse)	Q9WVA4
DBDB_24_03.raw	2341	K.LTETCFLDCVK.D	2	1	765.6	2.949	0.4103	1385.66	1.18981	0.9	47	(Q9WV98) TIM9_MOUSE Mitochondrial import inner membrane translocase subunit Ti	Q9WV98	1.18981	NA
DBDB_20_02.raw	2067	R.IADYEAASAAPGIPAEQTR.D	2	1	788.7	3.897	0.4681	1930.95	0.51025	0.95	83	(Q9WV96) TIM9B_MOUSE Mitochondrial import inner membrane translocase subunit T	Q9WV96	0.755043	0.284907
DBDB_20_03.raw	2157	R.IADYEAASAAPGIPAEQTR.D	2	1	709.7	3.674	0.4622	1930.95	0.6871	0.62	13	(Q9WV96) TIM9B_MOUSE Mitochondrial import inner membrane translocase subunit T	Q9WV96
DBDB_21_02.raw	2139	R.IADYEAASAAPGIPAEQTR[.D	2	1	361.7	2.356	0.1733	1934.95	1.06778	0.95	37	(Q9WV96) TIM9B_MOUSE Mitochondrial import inner membrane translocase subunit T	Q9WV96
DBDB_19_01.raw	12169	K.DSVSAAEVGTGQYATTK.G	2	1	1021.8	4.152	0.527	1684.8	0.74919	0.97	188	(Q9WV92) E41L3_MOUSE Band 4.1-like protein 3 - Mus musculus (Mouse)	Q9WV92	0.880327	0.338855
DBDB_19_01.raw	12253	K.DSVSAAEVGTGQYATTK.G	2	1	1244.9	3.802	0.3594	1684.8	0.62786	0.92	55	(Q9WV92) E41L3_MOUSE Band 4.1-like protein 3 - Mus musculus (Mouse)	Q9WV92
DBDB_19_02.raw	1812	K.DSVSAAEVGTGQYATTK.G	2	1	1772.5	5.506	0.6001	1684.8	0.56581	0.88	72	(Q9WV92) E41L3_MOUSE Band 4.1-like protein 3 - Mus musculus (Mouse)	Q9WV92
DBDB_19_03.raw	11945	K.DSVSAAEVGTGQYATTK.G	2	1	758.5	3.921	0.5486	1684.8	0.63605	0.84	45	(Q9WV92) E41L3_MOUSE Band 4.1-like protein 3 - Mus musculus (Mouse)	Q9WV92
DBDB_21_02.raw	3276	K.FYPPDPAQLSEDITR.Y	2	1	394.6	2.332	0.4855	1748.85	0.94335	0.76	24	(Q9WV92) E41L3_MOUSE Band 4.1-like protein 3 - Mus musculus (Mouse)	Q9WV92
DBDB_21_03.raw	3344	K.FYPPDPAQLSEDITR.Y	2	1	360.9	3.058	0.3713	1748.85	1.07583	0.8	1	(Q9WV92) E41L3_MOUSE Band 4.1-like protein 3 - Mus musculus (Mouse)	Q9WV92
DBDB_38_01.raw	4637	K.IRPGEFEQFESTIGFK.L	3	1	555.7	3.05	0.4202	1884.95	1.06725	0.68	8	(Q9WV92) E41L3_MOUSE Band 4.1-like protein 3 - Mus musculus (Mouse)	Q9WV92
DBDB_38_03.raw	4308	K.IRPGEFEQFESTIGFK.L	3	1	1008.8	3.346	0.3492	1884.95	-	0.96	97	(Q9WV92) E41L3_MOUSE Band 4.1-like protein 3 - Mus musculus (Mouse)	Q9WV92
DBDB_39_02.raw	5524	K.IRPGEFEQFESTIGFK.L	3	1	1058	3.403	0.4816	1884.95	1.7773	0.97	127	(Q9WV92) E41L3_MOUSE Band 4.1-like protein 3 - Mus musculus (Mouse)	Q9WV92
DBDB_39_03.raw	5902	K.IRPGEFEQFESTIGFK.L	3	1	1021.4	3.278	0.4274	1884.95	-	0.96	80	(Q9WV92) E41L3_MOUSE Band 4.1-like protein 3 - Mus musculus (Mouse)	Q9WV92
DBDB_39_03.raw	6159	K.IRPGEFEQFESTIGFK.L	3	1	541.9	3.611	0.4639	1884.95	-	0.98	181	(Q9WV92) E41L3_MOUSE Band 4.1-like protein 3 - Mus musculus (Mouse)	Q9WV92
DBDB_39_02.raw	4495	K.IRPGEFEQFESTIGFK[.L	3	1	843.6	3.011	0.2919	1888.95	1.67872	0.96	124	(Q9WV92) E41L3_MOUSE Band 4.1-like protein 3 - Mus musculus (Mouse)	Q9WV92
DBDB_20_01.raw	2155	K.VTLLDGSEYGCDVDK.R	2	1	1901.3	4.898	0.4568	1670.77	-	0.96	8	(Q9WV92) E41L3_MOUSE Band 4.1-like protein 3 - Mus musculus (Mouse)	Q9WV92
DBDB_20_02.raw	2368	K.VTLLDGSEYGCDVDK.R	2	1	1997.5	4.923	0.4453	1670.77	0.67662	0.96	76	(Q9WV92) E41L3_MOUSE Band 4.1-like protein 3 - Mus musculus (Mouse)	Q9WV92
DBDB_20_03.raw	2451	K.VTLLDGSEYGCDVDK.R	2	1	2599.5	4.4	0.4472	1670.77	-	0.96	104	(Q9WV92) E41L3_MOUSE Band 4.1-like protein 3 - Mus musculus (Mouse)	Q9WV92
DBDB_31_01.raw	2307	K.VTLLDGSEYGCDVDKR.S	2	1	1651.8	4.605	0.5565	1826.87	0.69101	0.71	84	(Q9WV92) E41L3_MOUSE Band 4.1-like protein 3 - Mus musculus (Mouse)	Q9WV92
DBDB_31_02.raw	2393	K.VTLLDGSEYGCDVDKR.S	2	1	1326.5	4.014	0.5454	1826.87	0.75862	0.95	132	(Q9WV92) E41L3_MOUSE Band 4.1-like protein 3 - Mus musculus (Mouse)	Q9WV92
DBDB_31_03.raw	2359	K.VTLLDGSEYGCDVDKR.S	2	1	1693.9	4.45	0.595	1826.87	0.63815	0.84	62	(Q9WV92) E41L3_MOUSE Band 4.1-like protein 3 - Mus musculus (Mouse)	Q9WV92
DBDB_18_01.raw	1349	R.DEVDAAESTPTDR.R	2	1	822.2	3.725	0.2853	1405.61	0.83239	0.93	110	(Q9WV92) E41L3_MOUSE Band 4.1-like protein 3 - Mus musculus (Mouse)	Q9WV92
DBDB_18_02.raw	1259	R.DEVDAAESTPTDR.R	2	1	1695.5	3.589	0.5563	1405.61	0.84115	0.96	41	(Q9WV92) E41L3_MOUSE Band 4.1-like protein 3 - Mus musculus (Mouse)	Q9WV92
DBDB_18_01.raw	1212	R.DEVDAAESTPTDR[.R	2	1	1107.4	3.602	0.3237	1409.61	0.64229	0.58	39	(Q9WV92) E41L3_MOUSE Band 4.1-like protein 3 - Mus musculus (Mouse)	Q9WV92
DBDB_18_01.raw	1309	R.DEVDAAESTPTDR[.R	2	1	1059.3	3.908	0.3329	1409.61	1.03893	0.97	111	(Q9WV92) E41L3_MOUSE Band 4.1-like protein 3 - Mus musculus (Mouse)	Q9WV92
DBDB_18_02.raw	1205	R.DEVDAAESTPTDR[.R	2	1	1594.3	4.369	0.5056	1409.61	-	0.98	217	(Q9WV92) E41L3_MOUSE Band 4.1-like protein 3 - Mus musculus (Mouse)	Q9WV92
DBDB_18_02.raw	1435	R.DEVDAAESTPTDR[.R	2	1	631	3.186	0.4003	1409.61	0.87305	0.88	92	(Q9WV92) E41L3_MOUSE Band 4.1-like protein 3 - Mus musculus (Mouse)	Q9WV92
DBDB_19_01.raw	1240	R.DEVDAAESTPTDR[.R	2	1	1120.5	3.949	0.325	1409.61	-	0.77	1	(Q9WV92) E41L3_MOUSE Band 4.1-like protein 3 - Mus musculus (Mouse)	Q9WV92
DBDB_25_02.raw	2059	R.GEEVDQSAPEQEQPATVSHEEEQASTIR.T	3	1	594.6	5.119	0.5056	3081.39	0.61265	0.97	26	(Q9WV92) E41L3_MOUSE Band 4.1-like protein 3 - Mus musculus (Mouse)	Q9WV92
DBDB_21_02.raw	2584	R.ALIGATDPGDAMPGTIR[.G	2	1	833	3.977	0.3945	1659.84	0.6373	0.97	109	(Q9WV85) NDK3_MOUSE Nucleoside diphosphate kinase 3 - Mus musculus (Mouse)	Q9WV85	0.6373	NA
DBDB_21_01.raw	1958	K.DEITEWESR.V	2	1	974.8	2.927	0.2871	1164.52	0.90069	0.97	116	(Q9WV80) SNX1_MOUSE Sorting nexin-1 - Mus musculus (Mouse)	Q9WV80	1.29587	0.203742
DBDB_35_03.raw	1798	K.HSQNGFIVPPPPEK.S	2	1	859.4	2.44	0.2366	1546.8	-	0.68	1	(Q9WV80) SNX1_MOUSE Sorting nexin-1 - Mus musculus (Mouse)	Q9WV80
DBDB_36_01.raw	2654	K.YLETLLHSQQQLAK.Y	2	1	1890.5	4.738	0.4635	1671.91	1.1222	0.73	13	(Q9WV80) SNX1_MOUSE Sorting nexin-1 - Mus musculus (Mouse)	Q9WV80
DBDB_36_02.raw	2548	K.YLETLLHSQQQLAK[.Y	2	1	1472.7	4.843	0.4587	1675.91	1.22769	0.98	180	(Q9WV80) SNX1_MOUSE Sorting nexin-1 - Mus musculus (Mouse)	Q9WV80
DBDB_26_01.raw	3190	K.YWEAFLPEAK.A	2	1	1556.8	3.351	0.2885	1253.62	SHARED	0.85	23	(Q9WV80) SNX1_MOUSE Sorting nexin-1 - Mus musculus (Mouse)	Q9WV80
DBDB_26_03.raw	3136	K.YWEAFLPEAK.A	2	1	1202.1	3.135	0.2817	1253.62	SHARED	0.81	33	(Q9WV80) SNX1_MOUSE Sorting nexin-1 - Mus musculus (Mouse)	Q9WV80
DBDB_26_01.raw	3231	K.YWEAFLPEAK[.A	2	1	1475.8	3.401	0.5664	1257.62	SHARED	0.95	90	(Q9WV80) SNX1_MOUSE Sorting nexin-1 - Mus musculus (Mouse)	Q9WV80
DBDB_26_02.raw	3240	K.YWEAFLPEAK[.A	2	1	1219.5	2.765	0.2116	1257.62	SHARED	0.95	67	(Q9WV80) SNX1_MOUSE Sorting nexin-1 - Mus musculus (Mouse)	Q9WV80
DBDB_25_03.raw	3221	R.FSDFLGLYEK.L	2	1	858.1	2.51	0.2832	1218.6	1.37547	0.98	162	(Q9WV80) SNX1_MOUSE Sorting nexin-1 - Mus musculus (Mouse)	Q9WV80
DBDB_25_01.raw	3205	R.FSDFLGLYEK[.L	2	1	590.3	2.486	0.3124	1222.6	1.28458	0.96	160	(Q9WV80) SNX1_MOUSE Sorting nexin-1 - Mus musculus (Mouse)	Q9WV80
DBDB_25_02.raw	3228	R.FSDFLGLYEK[.L	2	1	662.5	2.35	0.28	1222.6	1.35485	0.95	71	(Q9WV80) SNX1_MOUSE Sorting nexin-1 - Mus musculus (Mouse)	Q9WV80
DBDB_35_01.raw	1514	R.IVNHPTM*LQDPDVR.E	3	2	1043	4.0985	0.1734	1650.83	1.33667	0.82	41	(Q9WV80) SNX1_MOUSE Sorting nexin-1 - Mus musculus (Mouse)	Q9WV80
DBDB_35_03.raw	1489	R.IVNHPTM*LQDPDVR.E	3	1	552.3	3.495	0.1888	1650.83	1.43144	0.68	1	(Q9WV80) SNX1_MOUSE Sorting nexin-1 - Mus musculus (Mouse)	Q9WV80
DBDB_36_01.raw	1519	R.IVNHPTM*LQDPDVR[.E	3	1	1036.1	3.798	0.2081	1654.83	1.62922	0.46	57	(Q9WV80) SNX1_MOUSE Sorting nexin-1 - Mus musculus (Mouse)	Q9WV80
DBDB_22_02.raw	1531	K.FPAAQPPDPNQPAK.I	2	1	925.5	3.537	0.3979	1477.74	0.86551	0.9	55	(Q9WV69) DEMA_MOUSE Dematin - Mus musculus (Mouse)	Q9WV69	0.866636	0.152922
DBDB_23_01.raw	1509	K.FPAAQPPDPNQPAK.I	2	1	564.6	3.809	0.3732	1477.74	1.11965	0.94	67	(Q9WV69) DEMA_MOUSE Dematin - Mus musculus (Mouse)	Q9WV69
DBDB_20_02.raw	4382	K.IETDYWPCPPSLAVVETEWR.K	2	1	650.2	4.293	0.5907	2448.16	0.81118	0.99	278	(Q9WV69) DEMA_MOUSE Dematin - Mus musculus (Mouse)	Q9WV69
DBDB_20_03.raw	4502	K.IETDYWPCPPSLAVVETEWR.K	2	1	730.7	4.598	0.5762	2448.16	0.70861	0.98	25	(Q9WV69) DEMA_MOUSE Dematin - Mus musculus (Mouse)	Q9WV69
DBDB_20_01.raw	4022	K.IETDYWPCPPSLAVVETEWR[.K	2	1	867	3.943	0.3501	2452.16	0.82823	0.94	58	(Q9WV69) DEMA_MOUSE Dematin - Mus musculus (Mouse)	Q9WV69
DBDB_21_01.raw	1365	R.IQAAASPPANATAASDTNAGDR[.G	3	1	1525.9	5.061	0.5175	2073.98	1.76385	0.88	9	(Q9WV60) GSK3B_MOUSE Glycogen synthase kinase-3 beta - Mus musculus (Mouse)	Q9WV60	1.76385	NA
DBDB_21_03.raw	1374	R.IQAAASPPANATAASDTNAGDR[.G	3	1	1687.3	4.734	0.5021	2073.98	-	0.71	61	(Q9WV60) GSK3B_MOUSE Glycogen synthase kinase-3 beta - Mus musculus (Mouse)	Q9WV60
DBDB_36_03.raw	2876	K.HEQILVLDPPSDLK.F	3	1	1093	3.182	0.2073	1603.87	1.00185	0.71	17	(Q9WV55) VAPA_MOUSE Vesicle-associated membrane protein-associated protein A -	Q9WV55	0.956524	0.1432
DBDB_36_01.raw	2819	K.HEQILVLDPPSDLK[.F	2	1	847.4	4.407	0.3422	1607.87	0.96178	0.79	11	(Q9WV55) VAPA_MOUSE Vesicle-associated membrane protein-associated protein A -	Q9WV55
DBDB_36_02.raw	2702	K.HEQILVLDPPSDLK[.F	2	1	1024.7	4.917	0.4203	1607.87	1.02701	0.87	79	(Q9WV55) VAPA_MOUSE Vesicle-associated membrane protein-associated protein A -	Q9WV55
DBDB_36_03.raw	2862	K.HEQILVLDPPSDLK[.F	2	1	787.3	4.541	0.3925	1607.87	1.0799	0.56	18	(Q9WV55) VAPA_MOUSE Vesicle-associated membrane protein-associated protein A -	Q9WV55
DBDB_17_03.raw	2696	R.CVFEMPNENDKLNDM*EPSK.A	2	1	585.6	3.326	0.388	2312.99	0.71208	0.75	20	(Q9WV55) VAPA_MOUSE Vesicle-associated membrane protein-associated protein A -	Q9WV55
DBDB_32_01.raw	1416	K.ASSEGGAATGAGLDSLHK[.N	2	1	1857.6	5.002	0.484	1632.79	-	0.95	10	(Q9WV32) ARC1B_MOUSE Actin-related protein 2/3 complex subunit 1B - Mus muscul	Q9WV32	NA	NA
DBDB_16_02.raw	2248	K.NSVSQISVLSGGK.A	2	1	797.2	2.7	0.4105	1275.69	-	0.97	64	(Q9WV32) ARC1B_MOUSE Actin-related protein 2/3 complex subunit 1B - Mus muscul	Q9WV32
DBDB_16_03.raw	2229	K.NSVSQISVLSGGK.A	2	1	1299.4	3.113	0.3933	1275.69	-	0.92	3	(Q9WV32) ARC1B_MOUSE Actin-related protein 2/3 complex subunit 1B - Mus muscul	Q9WV32
DBDB_32_03.raw	1455	R.TVAVYSEQDTGQMHR.Q	2	1	1733.4	4.721	0.5884	1721.79	-	0.95	78	(Q9WV32) ARC1B_MOUSE Actin-related protein 2/3 complex subunit 1B - Mus muscul	Q9WV32
DBDB_01_01.raw	2871	R.LGAIVAVTGDGVNDSPALK.K	2	1	1170.1	2.879	0.4821	1796.98	SHARED	0.97	133	(Q9WV27) AT1A4_MOUSE Sodium/potassium-transporting ATPase subunit alpha-4 - Mu	Q9WV27	NA	NA
DBDB_01_02.raw	2720	R.LGAIVAVTGDGVNDSPALK.K	2	1	1620.2	3.684	0.3694	1796.98	SHARED	0.82	1	(Q9WV27) AT1A4_MOUSE Sodium/potassium-transporting ATPase subunit alpha-4 - Mu	Q9WV27
DBDB_01_02.raw	2853	R.LGAIVAVTGDGVNDSPALK.K	2	1	1204.5	3.123	0.3869	1796.98	SHARED	0.73	49	(Q9WV27) AT1A4_MOUSE Sodium/potassium-transporting ATPase subunit alpha-4 - Mu	Q9WV27
DBDB_01_02.raw	2985	R.LGAIVAVTGDGVNDSPALK.K	2	1	745.7	2.875	0.3121	1796.98	SHARED	0.93	64	(Q9WV27) AT1A4_MOUSE Sodium/potassium-transporting ATPase subunit alpha-4 - Mu	Q9WV27
DBDB_01_03.raw	2878	R.LGAIVAVTGDGVNDSPALK.K	2	1	1260.5	3.25	0.1203	1796.98	SHARED	0.85	102	(Q9WV27) AT1A4_MOUSE Sodium/potassium-transporting ATPase subunit alpha-4 - Mu	Q9WV27
DBDB_01_03.raw	2999	R.LGAIVAVTGDGVNDSPALK.K	2	1	1462.4	2.476	0.1715	1796.98	SHARED	0.79	17	(Q9WV27) AT1A4_MOUSE Sodium/potassium-transporting ATPase subunit alpha-4 - Mu	Q9WV27
DBDB_01_03.raw	3114	R.LGAIVAVTGDGVNDSPALK.K	2	1	926.6	2.546	0.2015	1796.98	SHARED	0.95	196	(Q9WV27) AT1A4_MOUSE Sodium/potassium-transporting ATPase subunit alpha-4 - Mu	Q9WV27
DBDB_02_01.raw	3284	R.LGAIVAVTGDGVNDSPALK.K	2	1	815	2.97	0.2833	1796.98	SHARED	0.96	152	(Q9WV27) AT1A4_MOUSE Sodium/potassium-transporting ATPase subunit alpha-4 - Mu	Q9WV27
DBDB_02_02.raw	3032	R.LGAIVAVTGDGVNDSPALK.K	2	1	872.9	2.311	0.081	1796.98	SHARED	0.93	36	(Q9WV27) AT1A4_MOUSE Sodium/potassium-transporting ATPase subunit alpha-4 - Mu	Q9WV27
DBDB_02_03.raw	3532	R.LGAIVAVTGDGVNDSPALK.K	2	1	315.7	2.146	0.18	1796.98	SHARED	0.83	48	(Q9WV27) AT1A4_MOUSE Sodium/potassium-transporting ATPase subunit alpha-4 - Mu	Q9WV27
DBDB_02_03.raw	3985	R.LGAIVAVTGDGVNDSPALK.K	2	1	585.1	2.177	0.1215	1796.98	SHARED	0.98	149	(Q9WV27) AT1A4_MOUSE Sodium/potassium-transporting ATPase subunit alpha-4 - Mu	Q9WV27
DBDB_02_03.raw	4491	R.LGAIVAVTGDGVNDSPALK.K	2	1	674.1	2.94	0.3167	1796.98	SHARED	0.94	71	(Q9WV27) AT1A4_MOUSE Sodium/potassium-transporting ATPase subunit alpha-4 - Mu	Q9WV27
DBDB_01_01.raw	2876	R.LGAIVAVTGDGVNDSPALK[.K	2	1	1627.1	4.354	0.4821	1800.98	SHARED	0.87	128	(Q9WV27) AT1A4_MOUSE Sodium/potassium-transporting ATPase subunit alpha-4 - Mu	Q9WV27
DBDB_01_03.raw	2815	R.LGAIVAVTGDGVNDSPALK[.K	2	1	1571	4.162	0.1137	1800.98	SHARED	0.85	91	(Q9WV27) AT1A4_MOUSE Sodium/potassium-transporting ATPase subunit alpha-4 - Mu	Q9WV27
DBDB_02_01.raw	2883	R.LGAIVAVTGDGVNDSPALK[.K	2	1	1519.4	4.48	0.4375	1800.98	SHARED	0.87	41	(Q9WV27) AT1A4_MOUSE Sodium/potassium-transporting ATPase subunit alpha-4 - Mu	Q9WV27
DBDB_02_01.raw	3016	R.LGAIVAVTGDGVNDSPALK[.K	2	1	1905.5	4.225	0.4921	1800.98	SHARED	0.81	24	(Q9WV27) AT1A4_MOUSE Sodium/potassium-transporting ATPase subunit alpha-4 - Mu	Q9WV27
DBDB_02_02.raw	2786	R.LGAIVAVTGDGVNDSPALK[.K	2	1	1554.8	3.839	0.4941	1800.98	SHARED	0.95	199	(Q9WV27) AT1A4_MOUSE Sodium/potassium-transporting ATPase subunit alpha-4 - Mu	Q9WV27
DBDB_02_02.raw	3125	R.LGAIVAVTGDGVNDSPALK[.K	2	1	963.4	3.63	0.0873	1800.98	SHARED	0.73	21	(Q9WV27) AT1A4_MOUSE Sodium/potassium-transporting ATPase subunit alpha-4 - Mu	Q9WV27
DBDB_02_02.raw	3881	R.LGAIVAVTGDGVNDSPALK[.K	2	1	393.4	2.775	0.3526	1800.98	SHARED	0.96	119	(Q9WV27) AT1A4_MOUSE Sodium/potassium-transporting ATPase subunit alpha-4 - Mu	Q9WV27
DBDB_02_03.raw	2790	R.LGAIVAVTGDGVNDSPALK[.K	2	1	1783.5	4.254	0.4384	1800.98	SHARED	0.93	110	(Q9WV27) AT1A4_MOUSE Sodium/potassium-transporting ATPase subunit alpha-4 - Mu	Q9WV27
DBDB_02_03.raw	3071	R.LGAIVAVTGDGVNDSPALK[.K	2	1	1375.5	3.859	0.3522	1800.98	SHARED	0.8	41	(Q9WV27) AT1A4_MOUSE Sodium/potassium-transporting ATPase subunit alpha-4 - Mu	Q9WV27
DBDB_02_03.raw	3252	R.LGAIVAVTGDGVNDSPALK[.K	2	1	917	3.271	0.3516	1800.98	SHARED	0.97	70	(Q9WV27) AT1A4_MOUSE Sodium/potassium-transporting ATPase subunit alpha-4 - Mu	Q9WV27
DBDB_02_03.raw	3384	R.LGAIVAVTGDGVNDSPALK[.K	2	1	921.8	2.86	0.1827	1800.98	SHARED	0.96	120	(Q9WV27) AT1A4_MOUSE Sodium/potassium-transporting ATPase subunit alpha-4 - Mu	Q9WV27
DBDB_03_01.raw	2884	R.LGAIVAVTGDGVNDSPALK[.K	2	1	365.3	3.138	0.5418	1800.98	SHARED	0.74	3	(Q9WV27) AT1A4_MOUSE Sodium/potassium-transporting ATPase subunit alpha-4 - Mu	Q9WV27
DBDB_26_02.raw	5650	K.TAGQLPFLEGEIFDSVKPGLSAFVDQPK[.Q	4	1	1139.2	3.957	0.3865	2994.55	-	0.95	175	(Q9WUZ9) ENTP5_MOUSE Ectonucleoside triphosphate diphosphohydrolase 5 precurso	Q9WUZ9	NA	NA
DBDB_27_03.raw	1249	K.FNQCGTCTEFK[.E	2	1	713.2	3.562	0.4252	1395.59	0.93455	0.97	85	(Q9WUU7) CATZ_MOUSE Cathepsin Z precursor - Mus musculus (Mouse)	Q9WUU7	1.05713	0.179872
DBDB_40_03.raw	1191	K.HGIPDETCNNYQAK.D	3	1	805	3.586	0.2718	1646.73	0.91114	0.98	170	(Q9WUU7) CATZ_MOUSE Cathepsin Z precursor - Mus musculus (Mouse)	Q9WUU7
DBDB_41_02.raw	1159	K.HGIPDETCNNYQAK.D	2	1	867.7	4.293	0.4508	1646.73	1.30245	0.94	61	(Q9WUU7) CATZ_MOUSE Cathepsin Z precursor - Mus musculus (Mouse)	Q9WUU7
DBDB_41_03.raw	1209	K.HGIPDETCNNYQAK.D	2	1	504.5	3.484	0.3134	1646.73	1.0804	0.98	233	(Q9WUU7) CATZ_MOUSE Cathepsin Z precursor - Mus musculus (Mouse)	Q9WUU7
DBDB_32_01.raw	1918	K.DAAKPVIELYK.S	3	1	601.5	3.544	0.2238	1246.7	0.5901	0.86	6	(Q9WUR9) KAD4_MOUSE Adenylate kinase isoenzyme 4, mitochondrial - Mus musculus	Q9WUR9	0.838203	0.356223
DBDB_32_01.raw	1934	K.DAAKPVIELYK.S	2	1	545.3	2.503	0.3134	1246.7	0.69638	0.9	37	(Q9WUR9) KAD4_MOUSE Adenylate kinase isoenzyme 4, mitochondrial - Mus musculus	Q9WUR9
DBDB_32_02.raw	1905	K.DAAKPVIELYK.S	2	1	480.9	2.571	0.2915	1246.7	0.60817	0.98	304	(Q9WUR9) KAD4_MOUSE Adenylate kinase isoenzyme 4, mitochondrial - Mus musculus	Q9WUR9
DBDB_32_03.raw	1997	K.DAAKPVIELYK.S	2	1	401.2	2.587	0.2732	1246.7	0.63382	0.93	89	(Q9WUR9) KAD4_MOUSE Adenylate kinase isoenzyme 4, mitochondrial - Mus musculus	Q9WUR9
DBDB_32_02.raw	1890	K.DAAKPVIELYK[.S	3	1	744.5	3.928	0.2154	1250.7	0.49611	0.7	4	(Q9WUR9) KAD4_MOUSE Adenylate kinase isoenzyme 4, mitochondrial - Mus musculus	Q9WUR9
DBDB_32_03.raw	1972	K.DAAKPVIELYK[.S	3	1	873.6	3.65	0.2133	1250.7	0.55101	0.89	46	(Q9WUR9) KAD4_MOUSE Adenylate kinase isoenzyme 4, mitochondrial - Mus musculus	Q9WUR9
DBDB_36_02.raw	2218	K.FLEEHPGGEEVLR[.E	2	1	619.3	4.187	0.2883	1515.75	-	0.87	46	(Q9WUR9) KAD4_MOUSE Adenylate kinase isoenzyme 4, mitochondrial - Mus musculus	Q9WUR9
DBDB_37_03.raw	2222	K.GLLVPDHVITR[.L	2	2	367.6	2.883	0.2559	1223.72	1.70281	0.97	127	(Q9WUR9) KAD4_MOUSE Adenylate kinase isoenzyme 4, mitochondrial - Mus musculus	Q9WUR9
DBDB_42_01.raw	1303	R.GVLHQFSGTETNR.I	3	1	557	3.065	0.3777	1445.71	0.98248	0.95	159	(Q9WUR9) KAD4_MOUSE Adenylate kinase isoenzyme 4, mitochondrial - Mus musculus	Q9WUR9
DBDB_42_03.raw	1242	R.GVLHQFSGTETNR.I	2	1	1560.7	3.805	0.4198	1445.71	1.14049	0.71	11	(Q9WUR9) KAD4_MOUSE Adenylate kinase isoenzyme 4, mitochondrial - Mus musculus	Q9WUR9
DBDB_42_03.raw	1290	R.GVLHQFSGTETNR.I	3	1	653.9	3.19	0.3925	1445.71	1.03006	0.94	109	(Q9WUR9) KAD4_MOUSE Adenylate kinase isoenzyme 4, mitochondrial - Mus musculus	Q9WUR9
DBDB_42_01.raw	1253	R.GVLHQFSGTETNR[.I	2	1	1282.5	3.571	0.433	1449.71	1.17619	0.92	124	(Q9WUR9) KAD4_MOUSE Adenylate kinase isoenzyme 4, mitochondrial - Mus musculus	Q9WUR9
DBDB_42_03.raw	1251	R.GVLHQFSGTETNR[.I	2	1	1234.5	3.776	0.3771	1449.71	1.15513	0.86	15	(Q9WUR9) KAD4_MOUSE Adenylate kinase isoenzyme 4, mitochondrial - Mus musculus	Q9WUR9
DBDB_51_03.raw	3125	R.IAQNFGLQHLSSGHLLR.E	3	1	553.7	3.308	0.4604	1891.03	0.73993	0.94	131	(Q9WUR9) KAD4_MOUSE Adenylate kinase isoenzyme 4, mitochondrial - Mus musculus	Q9WUR9
DBDB_22_01.raw	4242	R.VYNLDFNPPQVQGIDDITGEPLVQQEDDKPEAVAAR.L	3	1	676	6.451	0.4819	3980.95	0.75444	0.9	42	(Q9WUR9) KAD4_MOUSE Adenylate kinase isoenzyme 4, mitochondrial - Mus musculus	Q9WUR9
DBDB_22_03.raw	4202	R.VYNLDFNPPQVQGIDDITGEPLVQQEDDKPEAVAAR.L	3	1	723.2	5.138	0.5582	3980.95	0.31593	0.87	55	(Q9WUR9) KAD4_MOUSE Adenylate kinase isoenzyme 4, mitochondrial - Mus musculus	Q9WUR9
DBDB_18_02.raw	2127	K.DILVTSEDGITK.I	2	1	1503.8	3.346	0.4666	1290.68	1.34975	0.78	47	(Q9WUR2) PECI_MOUSE Peroxisomal 3,2-trans-enoyl-CoA isomerase - Mus musculus (	Q9WUR2	1.74958	0.258258
DBDB_18_03.raw	2052	K.DILVTSEDGITK[.I	2	1	1396	3.971	0.3358	1294.68	1.63304	0.92	8	(Q9WUR2) PECI_MOUSE Peroxisomal 3,2-trans-enoyl-CoA isomerase - Mus musculus (	Q9WUR2
DBDB_19_01.raw	12203	K.DILVTSEDGITK[.I	2	1	420.1	2.688	0.4011	1294.68	1.9721	0.75	30	(Q9WUR2) PECI_MOUSE Peroxisomal 3,2-trans-enoyl-CoA isomerase - Mus musculus (	Q9WUR2
DBDB_19_01.raw	2317	K.DILVTSEDGITK[.I	2	1	1517.6	4.206	0.4185	1294.68	-	0.81	51	(Q9WUR2) PECI_MOUSE Peroxisomal 3,2-trans-enoyl-CoA isomerase - Mus musculus (	Q9WUR2
DBDB_19_02.raw	2236	K.DILVTSEDGITK[.I	2	1	1591.7	4.146	0.4111	1294.68	1.91459	0.96	109	(Q9WUR2) PECI_MOUSE Peroxisomal 3,2-trans-enoyl-CoA isomerase - Mus musculus (	Q9WUR2
DBDB_21_02.raw	1833	R.ASQQDFENALNQVK.L	2	1	1791.2	3	0.1813	1591.77	-	0.8	55	(Q9WUR2) PECI_MOUSE Peroxisomal 3,2-trans-enoyl-CoA isomerase - Mus musculus (	Q9WUR2
DBDB_23_02.raw	2346	R.ASQQDFENALNQVK.L	2	1	1130.7	3.591	0.2146	1591.77	-	0.93	11	(Q9WUR2) PECI_MOUSE Peroxisomal 3,2-trans-enoyl-CoA isomerase - Mus musculus (	Q9WUR2
DBDB_23_03.raw	2385	R.ASQQDFENALNQVK.L	2	1	1319.8	4.116	0.1443	1591.77	-	0.97	24	(Q9WUR2) PECI_MOUSE Peroxisomal 3,2-trans-enoyl-CoA isomerase - Mus musculus (	Q9WUR2
DBDB_24_01.raw	2369	R.ASQQDFENALNQVK[.L	2	2	976.7	2.928	0.1612	1595.77	1.87842	0.96	94	(Q9WUR2) PECI_MOUSE Peroxisomal 3,2-trans-enoyl-CoA isomerase - Mus musculus (	Q9WUR2
DBDB_42_01.raw	2758	K.HLGLPVFNTVK.E	2	1	541.6	2.036	0.1513	1224.71	0.54383	0.93	29	(Q9WUM5) SUCA_MOUSE Succinyl-CoA ligase [GDP-forming] subunit alpha, mitochond	Q9WUM5	0.820352	0.157212
DBDB_43_01.raw	2710	K.HLGLPVFNTVK.E	3	1	521.1	3.481	0.2105	1224.71	0.85567	0.82	7	(Q9WUM5) SUCA_MOUSE Succinyl-CoA ligase [GDP-forming] subunit alpha, mitochond	Q9WUM5
DBDB_43_01.raw	2730	K.HLGLPVFNTVK.E	2	1	888.1	2.574	0.2408	1224.71	0.84167	0.89	84	(Q9WUM5) SUCA_MOUSE Succinyl-CoA ligase [GDP-forming] subunit alpha, mitochond	Q9WUM5
DBDB_43_01.raw	2853	K.HLGLPVFNTVK.E	2	1	685.4	2.357	0.3193	1224.71	0.87118	0.98	52	(Q9WUM5) SUCA_MOUSE Succinyl-CoA ligase [GDP-forming] subunit alpha, mitochond	Q9WUM5
DBDB_43_02.raw	2891	K.HLGLPVFNTVK.E	3	1	610.1	3.465	0.2341	1224.71	0.86908	0.95	60	(Q9WUM5) SUCA_MOUSE Succinyl-CoA ligase [GDP-forming] subunit alpha, mitochond	Q9WUM5
DBDB_43_02.raw	2911	K.HLGLPVFNTVK.E	2	1	601.8	2.397	0.2258	1224.71	0.94459	0.96	55	(Q9WUM5) SUCA_MOUSE Succinyl-CoA ligase [GDP-forming] subunit alpha, mitochond	Q9WUM5
DBDB_43_02.raw	3020	K.HLGLPVFNTVK.E	3	1	480	3.075	0.155	1224.71	0.95511	0.96	71	(Q9WUM5) SUCA_MOUSE Succinyl-CoA ligase [GDP-forming] subunit alpha, mitochond	Q9WUM5
DBDB_43_03.raw	2750	K.HLGLPVFNTVK.E	2	1	879.5	2.324	0.3192	1224.71	0.88808	0.93	20	(Q9WUM5) SUCA_MOUSE Succinyl-CoA ligase [GDP-forming] subunit alpha, mitochond	Q9WUM5
DBDB_43_03.raw	2876	K.HLGLPVFNTVK.E	2	1	704.9	2.357	0.2714	1224.71	0.89351	0.59	24	(Q9WUM5) SUCA_MOUSE Succinyl-CoA ligase [GDP-forming] subunit alpha, mitochond	Q9WUM5
DBDB_42_01.raw	2720	K.HLGLPVFNTVK[.E	2	1	496.1	2.127	0.1404	1228.71	0.58342	0.88	8	(Q9WUM5) SUCA_MOUSE Succinyl-CoA ligase [GDP-forming] subunit alpha, mitochond	Q9WUM5
DBDB_42_02.raw	2671	K.HLGLPVFNTVK[.E	2	1	578.9	2.502	0.2242	1228.71	0.54661	0.94	84	(Q9WUM5) SUCA_MOUSE Succinyl-CoA ligase [GDP-forming] subunit alpha, mitochond	Q9WUM5
DBDB_42_03.raw	2761	K.HLGLPVFNTVK[.E	2	1	567.6	2.555	0.2243	1228.71	0.63496	0.87	61	(Q9WUM5) SUCA_MOUSE Succinyl-CoA ligase [GDP-forming] subunit alpha, mitochond	Q9WUM5
DBDB_43_02.raw	2758	K.HLGLPVFNTVK[.E	2	1	464.4	2.395	0.2854	1228.71	1.01309	0.97	108	(Q9WUM5) SUCA_MOUSE Succinyl-CoA ligase [GDP-forming] subunit alpha, mitochond	Q9WUM5
DBDB_43_02.raw	2884	K.HLGLPVFNTVK[.E	2	1	884.9	2.617	0.3009	1228.71	0.92083	0.96	123	(Q9WUM5) SUCA_MOUSE Succinyl-CoA ligase [GDP-forming] subunit alpha, mitochond	Q9WUM5
DBDB_43_02.raw	3018	K.HLGLPVFNTVK[.E	2	1	690.3	2.347	0.1267	1228.71	0.80489	0.92	86	(Q9WUM5) SUCA_MOUSE Succinyl-CoA ligase [GDP-forming] subunit alpha, mitochond	Q9WUM5
DBDB_43_03.raw	2878	K.HLGLPVFNTVK[.E	2	1	746.2	2.619	0.25	1228.71	0.85893	0.88	23	(Q9WUM5) SUCA_MOUSE Succinyl-CoA ligase [GDP-forming] subunit alpha, mitochond	Q9WUM5
DBDB_20_01.raw	3402	K.ISALQSAGVVVSMSPAQLGTTIYK.E	3	1	1773	5.892	0.617	2421.31	0.62337	0.98	191	(Q9WUM5) SUCA_MOUSE Succinyl-CoA ligase [GDP-forming] subunit alpha, mitochond	Q9WUM5
DBDB_20_01.raw	3406	K.ISALQSAGVVVSMSPAQLGTTIYK.E	2	1	1505.3	6.107	0.6286	2421.31	0.67518	0.92	132	(Q9WUM5) SUCA_MOUSE Succinyl-CoA ligase [GDP-forming] subunit alpha, mitochond	Q9WUM5
DBDB_20_01.raw	6799	K.ISALQSAGVVVSMSPAQLGTTIYK[.E	3	1	755.2	3.015	0.2205	2425.31	-	0.98	84	(Q9WUM5) SUCA_MOUSE Succinyl-CoA ligase [GDP-forming] subunit alpha, mitochond	Q9WUM5
DBDB_20_03.raw	7471	K.ISALQSAGVVVSMSPAQLGTTIYK[.E	3	1	898.7	3.491	0.2852	2425.31	-	0.94	24	(Q9WUM5) SUCA_MOUSE Succinyl-CoA ligase [GDP-forming] subunit alpha, mitochond	Q9WUM5
DBDB_20_03.raw	2331	R.LIGPNCPGVINPGECK.I	2	1	563.3	2.503	0.254	1724.86	-	0.97	135	(Q9WUM5) SUCA_MOUSE Succinyl-CoA ligase [GDP-forming] subunit alpha, mitochond	Q9WUM5
DBDB_21_02.raw	2300	R.LIGPNCPGVINPGECK.I	2	1	598	2.466	0.1945	1724.86	-	0.97	255	(Q9WUM5) SUCA_MOUSE Succinyl-CoA ligase [GDP-forming] subunit alpha, mitochond	Q9WUM5
DBDB_22_01.raw	2158	R.LIGPNCPGVINPGECK.I	2	1	837.6	2.672	0.1576	1724.86	-	0.9	71	(Q9WUM5) SUCA_MOUSE Succinyl-CoA ligase [GDP-forming] subunit alpha, mitochond	Q9WUM5
DBDB_22_03.raw	2134	R.LIGPNCPGVINPGECK.I	2	1	862.1	2.776	0.355	1724.86	-	0.95	85	(Q9WUM5) SUCA_MOUSE Succinyl-CoA ligase [GDP-forming] subunit alpha, mitochond	Q9WUM5
DBDB_23_01.raw	1932	R.LIGPNCPGVINPGECK.I	2	1	1837.1	3.666	0.6276	1724.86	0.92137	0.94	52	(Q9WUM5) SUCA_MOUSE Succinyl-CoA ligase [GDP-forming] subunit alpha, mitochond	Q9WUM5
DBDB_23_02.raw	1949	R.LIGPNCPGVINPGECK.I	2	1	1165.4	3.392	0.6003	1724.86	0.8794	0.96	109	(Q9WUM5) SUCA_MOUSE Succinyl-CoA ligase [GDP-forming] subunit alpha, mitochond	Q9WUM5
DBDB_23_03.raw	1906	R.LIGPNCPGVINPGECK.I	2	1	929.9	4.021	0.4331	1724.86	-	0.84	16	(Q9WUM5) SUCA_MOUSE Succinyl-CoA ligase [GDP-forming] subunit alpha, mitochond	Q9WUM5
DBDB_23_01.raw	1913	R.LIGPNCPGVINPGECK[.I	2	1	964	4.613	0.4106	1728.86	1.10262	0.81	17	(Q9WUM5) SUCA_MOUSE Succinyl-CoA ligase [GDP-forming] subunit alpha, mitochond	Q9WUM5
DBDB_27_01.raw	5048	R.KSDLFQDDLYPDTAGPEAALEAEEWFEGK.N	3	1	1422	4.99	0.5868	3271.5	-	0.89	116	(Q9WUM4) COR1C_MOUSE Coronin-1C - Mus musculus (Mouse)	Q9WUM4	NA	NA
DBDB_20_02.raw	1933	R.SGASTATAVTDVPSGNLAGAGEAGK.L	2	1	907.8	6.553	0.6331	2189.07	1.19929	0.95	81	(Q9WUM3) COR1B_MOUSE Coronin-1B - Mus musculus (Mouse)	Q9WUM3	1.54258	0.480134
DBDB_20_03.raw	2033	R.SGASTATAVTDVPSGNLAGAGEAGK.L	2	1	1359.7	6.541	0.6818	2189.07	1.3372	0.93	26	(Q9WUM3) COR1B_MOUSE Coronin-1B - Mus musculus (Mouse)	Q9WUM3
DBDB_20_02.raw	1942	R.SGASTATAVTDVPSGNLAGAGEAGK[.L	2	1	1050.3	6.832	0.6601	2193.07	2.09124	0.91	41	(Q9WUM3) COR1B_MOUSE Coronin-1B - Mus musculus (Mouse)	Q9WUM3
DBDB_22_01.raw	2510	K.EALTYDGALLGDR.S	2	1	1643.2	3.358	0.1332	1393.7	0.66444	0.96	71	(Q9WUK2) IF4H_MOUSE Eukaryotic translation initiation factor 4H - Mus musculus	Q9WUK2	0.66444	NA
DBDB_15_02.raw	1386	-.M*SDVTIVKEGWVQK[.R	2	2	376.6	2.789	0.1809	1639.84	0.43724	0.84	34	(Q9WUA6) AKT3_MOUSE RAC-gamma serine/threonine-protein kinase - Mus musculus (	Q9WUA6	0.43724	NA
DBDB_37_03.raw	4322	K.TPGFEIIHGLLDR[.I	3	1	763.1	3.696	0.4742	1471.8	0.96337	0.91	168	(Q9WUA2) SYFB_MOUSE Phenylalanyl-tRNA synthetase beta chain - Mus musculus (Mo	Q9WUA2	1.08302	0.169211
DBDB_24_02.raw	3611	R.YDLLCLEGLAR.G	2	1	969	2.722	0.2707	1322.69	1.20267	0.8	16	(Q9WUA2) SYFB_MOUSE Phenylalanyl-tRNA synthetase beta chain - Mus musculus (Mo	Q9WUA2
DBDB_18_01.raw	2716	K.DAYDNVTLDM*ELAR.R	2	1	1237.2	4.885	0.5013	1641.74	0.47101	0.84	8	(Q9WU79) PROD_MOUSE Proline oxidase, mitochondrial precursor - Mus musculus (M	Q9WU79	0.646866	0.188769
DBDB_18_01.raw	2718	K.DAYDNVTLDM*ELAR.R	3	1	1900.6	4.466	0.4769	1641.74	0.51406	0.98	201	(Q9WU79) PROD_MOUSE Proline oxidase, mitochondrial precursor - Mus musculus (M	Q9WU79
DBDB_18_03.raw	2673	K.DAYDNVTLDM*ELAR.R	2	1	1250.6	5.107	0.5372	1641.74	0.45613	0.78	17	(Q9WU79) PROD_MOUSE Proline oxidase, mitochondrial precursor - Mus musculus (M	Q9WU79
DBDB_22_01.raw	2584	K.LEVAVLQDSIAK.M	2	1	1605.8	3.339	0.4753	1285.74	0.93704	0.83	39	(Q9WU79) PROD_MOUSE Proline oxidase, mitochondrial precursor - Mus musculus (M	Q9WU79
DBDB_28_01.raw	2578	R.AAEIGYEDPINPTYEATNAM*YHR.C	3	1	531.1	4.492	0.3564	2642.18	-	0.93	16	(Q9WU79) PROD_MOUSE Proline oxidase, mitochondrial precursor - Mus musculus (M	Q9WU79
DBDB_28_02.raw	2554	R.AAEIGYEDPINPTYEATNAM*YHR.C	3	1	728	4.142	0.4904	2642.18	-	0.91	24	(Q9WU79) PROD_MOUSE Proline oxidase, mitochondrial precursor - Mus musculus (M	Q9WU79
DBDB_28_03.raw	2595	R.AAEIGYEDPINPTYEATNAM*YHR.C	3	1	682.2	4.12	0.3371	2642.18	0.49402	0.97	107	(Q9WU79) PROD_MOUSE Proline oxidase, mitochondrial precursor - Mus musculus (M	Q9WU79
DBDB_28_01.raw	2995	R.AAEIGYEDPINPTYEATNAMYHR.C	3	1	961.9	4.684	0.339	2626.19	-	0.97	253	(Q9WU79) PROD_MOUSE Proline oxidase, mitochondrial precursor - Mus musculus (M	Q9WU79
DBDB_43_01.raw	1378	R.FFHQMAAEQGQAGR.A	3	1	1967.2	4.796	0.3428	1577.73	0.94672	0.91	7	(Q9WU79) PROD_MOUSE Proline oxidase, mitochondrial precursor - Mus musculus (M	Q9WU79
DBDB_43_03.raw	1395	R.FFHQMAAEQGQAGR.A	3	1	1791.8	4.539	0.3241	1577.73	0.88708	0.85	14	(Q9WU79) PROD_MOUSE Proline oxidase, mitochondrial precursor - Mus musculus (M	Q9WU79
DBDB_36_02.raw	3544	R.HLVVPNVQTGQLEPLLSR.F	3	1	875	3.022	0.3442	2000.13	0.56542	0.83	9	(Q9WU79) PROD_MOUSE Proline oxidase, mitochondrial precursor - Mus musculus (M	Q9WU79
DBDB_36_01.raw	3485	R.HLVVPNVQTGQLEPLLSR[.F	3	1	1425	3.741	0.434	2004.13	0.54923	0.93	20	(Q9WU79) PROD_MOUSE Proline oxidase, mitochondrial precursor - Mus musculus (M	Q9WU79
DBDB_36_02.raw	3411	R.HLVVPNVQTGQLEPLLSR[.F	3	1	1039.7	3.432	0.231	2004.13	0.64249	0.93	85	(Q9WU79) PROD_MOUSE Proline oxidase, mitochondrial precursor - Mus musculus (M	Q9WU79
DBDB_36_03.raw	3565	R.HLVVPNVQTGQLEPLLSR[.F	3	1	1749.5	4.513	0.3082	2004.13	0.65233	0.75	2	(Q9WU79) PROD_MOUSE Proline oxidase, mitochondrial precursor - Mus musculus (M	Q9WU79
DBDB_23_02.raw	1752	K.FIQQTYPSGGEEQAQYCR.A	3	1	691.5	4.407	0.4338	2161.97	-	0.9	59	(Q9WU78) PDC6I_MOUSE Programmed cell death 6-interacting protein - Mus musculu	Q9WU78	1.07307	0.259464
DBDB_23_02.raw	1757	K.FIQQTYPSGGEEQAQYCR[.A	2	1	746.3	5.759	0.5943	2165.97	0.96424	0.97	142	(Q9WU78) PDC6I_MOUSE Programmed cell death 6-interacting protein - Mus musculu	Q9WU78
DBDB_25_01.raw	3759	K.FYNELTEILVR.F	2	1	1488.1	2.678	0.2822	1396.75	0.68114	0.83	29	(Q9WU78) PDC6I_MOUSE Programmed cell death 6-interacting protein - Mus musculu	Q9WU78
DBDB_43_01.raw	2033	K.HEGALETLLR[.Y	2	1	941.5	2.68	0.319	1142.62	1.1652	0.88	16	(Q9WU78) PDC6I_MOUSE Programmed cell death 6-interacting protein - Mus musculu	Q9WU78
DBDB_23_02.raw	2841	K.LANQAADYFGDAFK[.Q	2	1	357.3	3.41	0.3283	1534.72	-	0.97	24	(Q9WU78) PDC6I_MOUSE Programmed cell death 6-interacting protein - Mus musculu	Q9WU78
DBDB_21_03.raw	3138	K.STSVVEQGGIQTVDQLIK.E	2	1	940.7	3.813	0.4409	1902.02	1.35436	0.96	168	(Q9WU78) PDC6I_MOUSE Programmed cell death 6-interacting protein - Mus musculu	Q9WU78
DBDB_15_01.raw	5652	R.EATTLANGVLASLNLPAAIEDVSGDTVPQSILTK[.S	3	1	349.6	3.058	0.179	3412.81	-	0.98	163	(Q9WU78) PDC6I_MOUSE Programmed cell death 6-interacting protein - Mus musculu	Q9WU78
DBDB_19_03.raw	2105	R.LLDEEEATDNDLR.A	2	1	614.2	2.696	0.2186	1532.71	-	0.96	144	(Q9WU78) PDC6I_MOUSE Programmed cell death 6-interacting protein - Mus musculu	Q9WU78
DBDB_21_01.raw	1937	R.LLDEEEATDNDLR.A	2	1	1573.4	3.868	0.4523	1532.71	1.20043	0.76	5	(Q9WU78) PDC6I_MOUSE Programmed cell death 6-interacting protein - Mus musculu	Q9WU78
DBDB_23_01.raw	1575	K.NDFTEEEEAQVR.K	2	1	1510	3.498	0.353	1466.64	0.9274	0.92	101	(Q9WTX5) SKP1_MOUSE S-phase kinase-associated protein 1 - Mus musculus (Mouse)	Q9WTX5	1.00335	0.179824
DBDB_23_02.raw	1675	K.NDFTEEEEAQVR.K	2	1	960.6	2.917	0.194	1466.64	-	0.85	34	(Q9WTX5) SKP1_MOUSE S-phase kinase-associated protein 1 - Mus musculus (Mouse)	Q9WTX5
DBDB_23_03.raw	1530	K.NDFTEEEEAQVR.K	2	1	733.9	2.4	0.2377	1466.64	0.87784	0.87	30	(Q9WTX5) SKP1_MOUSE S-phase kinase-associated protein 1 - Mus musculus (Mouse)	Q9WTX5
DBDB_23_02.raw	1545	K.NDFTEEEEAQVR[.K	2	1	1322.7	3.806	0.3987	1470.64	1.34509	0.84	8	(Q9WTX5) SKP1_MOUSE S-phase kinase-associated protein 1 - Mus musculus (Mouse)	Q9WTX5
DBDB_23_03.raw	1551	K.NDFTEEEEAQVR[.K	2	1	1562.4	3.705	0.2857	1470.64	0.85743	0.89	34	(Q9WTX5) SKP1_MOUSE S-phase kinase-associated protein 1 - Mus musculus (Mouse)	Q9WTX5
DBDB_21_01.raw	3655	R.TDDIPVWDQEFLK[.V	2	1	498.1	3.919	0.3455	1609.78	0.97401	0.67	16	(Q9WTX5) SKP1_MOUSE S-phase kinase-associated protein 1 - Mus musculus (Mouse)	Q9WTX5
DBDB_21_02.raw	3640	R.TDDIPVWDQEFLK[.V	2	1	463.7	3.17	0.2857	1609.78	1.03832	0.95	100	(Q9WTX5) SKP1_MOUSE S-phase kinase-associated protein 1 - Mus musculus (Mouse)	Q9WTX5
DBDB_34_01.raw	1785	R.LPEYTLSQEGGPAHK[.R	3	1	1284.6	4.013	0.3904	1630.81	1.01882	0.92	45	(Q9WTX2) PRKRA_MOUSE Interferon-inducible double stranded RNA-dependent protei	Q9WTX2	1.01938	0.000784889
DBDB_34_02.raw	1717	R.LPEYTLSQEGGPAHK[.R	3	1	1139.8	4.495	0.391	1630.81	1.01993	0.75	57	(Q9WTX2) PRKRA_MOUSE Interferon-inducible double stranded RNA-dependent protei	Q9WTX2
DBDB_32_01.raw	3805	R.QDGMFDLVANGGASLTLVFER.S	2	2	794.4	3.037	0.1574	2240.1	-	0.97	156	(Q9WTS6) TEN3_MOUSE Teneurin-3 - Mus musculus (Mouse)	Q9WTS6	NA	NA
DBDB_21_01.raw	2565	R.VYLATDDPTLLK.E	2	1	829.5	2.78	0.1882	1348.74	0.93734	0.92	78	(Q9WTS2) FUT8_MOUSE Alpha-(1,6)-fucosyltransferase - Mus musculus (Mouse)	Q9WTS2	0.93734	NA
DBDB_18_03.raw	2923	K.DITAEATPALAQTLPGGK.D	2	1	696.9	2.256	0.1272	1753.93	1.71553	0.96	92	(Q9WTQ5) AKA12_MOUSE A-kinase anchor protein 12 - Mus musculus (Mouse)	Q9WTQ5	0.930896	0.43902
DBDB_20_02.raw	1239	K.GPSEAPQEAEAEEGATSDGEK.K	2	1	1013.9	5.588	0.5642	2088.88	0.75459	0.77	37	(Q9WTQ5) AKA12_MOUSE A-kinase anchor protein 12 - Mus musculus (Mouse)	Q9WTQ5
DBDB_20_03.raw	1318	K.GPSEAPQEAEAEEGATSDGEK[.K	2	1	1483.6	5.919	0.506	2092.88	0.74018	0.95	113	(Q9WTQ5) AKA12_MOUSE A-kinase anchor protein 12 - Mus musculus (Mouse)	Q9WTQ5
DBDB_17_02.raw	3987	R.DVLEPTQALAAGAVPILAK[.A	2	1	1397.5	3.331	0.2272	1881.07	0.74008	0.68	9	(Q9WTQ5) AKA12_MOUSE A-kinase anchor protein 12 - Mus musculus (Mouse)	Q9WTQ5
DBDB_17_03.raw	4025	R.DVLEPTQALAAGAVPILAK[.A	2	1	1406.6	3.701	0.3948	1881.07	0.7041	0.97	285	(Q9WTQ5) AKA12_MOUSE A-kinase anchor protein 12 - Mus musculus (Mouse)	Q9WTQ5
DBDB_22_01.raw	2156	K.AYEAQTEPVLQYYQK.K	2	1	1206	4.376	0.4607	1830.89	-	0.9	69	(Q9WTP7) KAD3_MOUSE GTP:AMP phosphotransferase mitochondrial - Mus musculus (M	Q9WTP7	0.947989	0.239439
DBDB_22_02.raw	2256	K.AYEAQTEPVLQYYQK.K	2	1	1041.6	3.383	0.2642	1830.89	-	0.82	43	(Q9WTP7) KAD3_MOUSE GTP:AMP phosphotransferase mitochondrial - Mus musculus (M	Q9WTP7
DBDB_22_03.raw	2158	K.AYEAQTEPVLQYYQK.K	2	1	1175	3.544	0.3851	1830.89	0.7512	0.97	71	(Q9WTP7) KAD3_MOUSE GTP:AMP phosphotransferase mitochondrial - Mus musculus (M	Q9WTP7
DBDB_22_03.raw	2155	K.AYEAQTEPVLQYYQK[.K	2	1	1042.6	4.15	0.228	1834.89	0.74271	0.92	19	(Q9WTP7) KAD3_MOUSE GTP:AMP phosphotransferase mitochondrial - Mus musculus (M	Q9WTP7
DBDB_24_01.raw	3753	K.TLTQCSWLLDGFPR.T	2	2	602.3	2.226	0.1766	1693.84	1.17421	0.92	79	(Q9WTP7) KAD3_MOUSE GTP:AMP phosphotransferase mitochondrial - Mus musculus (M	Q9WTP7
DBDB_24_02.raw	3782	K.TLTQCSWLLDGFPR.T	2	2	379.9	2.33	0.2094	1693.84	1.46031	0.97	101	(Q9WTP7) KAD3_MOUSE GTP:AMP phosphotransferase mitochondrial - Mus musculus (M	Q9WTP7
DBDB_21_01.raw	3183	K.TVGIDDLTGEPLIQR.E	2	1	624.5	3.786	0.387	1626.87	0.81951	0.73	41	(Q9WTP7) KAD3_MOUSE GTP:AMP phosphotransferase mitochondrial - Mus musculus (M	Q9WTP7
DBDB_21_03.raw	3270	K.TVGIDDLTGEPLIQR.E	2	1	763.1	4.506	0.4304	1626.87	0.74668	0.98	153	(Q9WTP7) KAD3_MOUSE GTP:AMP phosphotransferase mitochondrial - Mus musculus (M	Q9WTP7
DBDB_21_01.raw	3204	K.TVGIDDLTGEPLIQR[.E	2	1	906.4	4.484	0.4298	1630.87	-	0.8	18	(Q9WTP7) KAD3_MOUSE GTP:AMP phosphotransferase mitochondrial - Mus musculus (M	Q9WTP7
DBDB_20_01.raw	4372	K.VYQIDTVINLNVPFEVIK[.Q	2	1	523	3.541	0.2874	2108.17	0.86096	0.89	16	(Q9WTP7) KAD3_MOUSE GTP:AMP phosphotransferase mitochondrial - Mus musculus (M	Q9WTP7
DBDB_04_02.raw	2838	R.QNMLQGTEIGVLAK.T	2	1	740.4	2.61	0.3062	1501.8	0.88301	0.96	125	(Q9WTP7) KAD3_MOUSE GTP:AMP phosphotransferase mitochondrial - Mus musculus (M	Q9WTP7
DBDB_24_01.raw	2460	R.QNMLQGTEIGVLAK[.T	2	1	785.3	3.531	0.151	1505.8	0.92004	0.82	26	(Q9WTP7) KAD3_MOUSE GTP:AMP phosphotransferase mitochondrial - Mus musculus (M	Q9WTP7
DBDB_24_02.raw	2499	R.QNMLQGTEIGVLAK[.T	2	1	614.9	3.699	0.2638	1505.8	-	0.88	54	(Q9WTP7) KAD3_MOUSE GTP:AMP phosphotransferase mitochondrial - Mus musculus (M	Q9WTP7
DBDB_25_01.raw	2105	R.VYNIEFNPPK.T	2	1	1510.6	3.538	0.377	1220.63	0.86617	0.98	185	(Q9WTP7) KAD3_MOUSE GTP:AMP phosphotransferase mitochondrial - Mus musculus (M	Q9WTP7
DBDB_25_02.raw	2120	R.VYNIEFNPPK.T	2	1	1555.5	3.559	0.4361	1220.63	0.82326	0.58	5	(Q9WTP7) KAD3_MOUSE GTP:AMP phosphotransferase mitochondrial - Mus musculus (M	Q9WTP7
DBDB_26_02.raw	2172	R.VYNIEFNPPK.T	2	2	562.4	2.392	0.3343	1220.63	1.32781	0.88	44	(Q9WTP7) KAD3_MOUSE GTP:AMP phosphotransferase mitochondrial - Mus musculus (M	Q9WTP7
DBDB_20_01.raw	1780	K.DDITGEPLIR[.R	2	1	1118.7	2.89	0.2896	1132.59	1.1279	0.89	73	(Q9WTP6) KAD2_MOUSE Adenylate kinase isoenzyme 2, mitochondrial - Mus musculus	Q9WTP6	0.856269	0.219252
DBDB_20_02.raw	1926	K.DDITGEPLIR[.R	2	1	995.3	3.436	0.3281	1132.59	0.96414	0.94	53	(Q9WTP6) KAD2_MOUSE Adenylate kinase isoenzyme 2, mitochondrial - Mus musculus	Q9WTP6
DBDB_33_01.raw	3206	K.LAENFCVCHLATGDMLR.A	3	1	629.6	3.414	0.3528	2006.94	0.70033	0.82	24	(Q9WTP6) KAD2_MOUSE Adenylate kinase isoenzyme 2, mitochondrial - Mus musculus	Q9WTP6
DBDB_21_01.raw	3099	K.LVSDEM*VVELIEK.N	2	1	1039	3.712	0.3946	1519.79	0.91116	0.97	75	(Q9WTP6) KAD2_MOUSE Adenylate kinase isoenzyme 2, mitochondrial - Mus musculus	Q9WTP6
DBDB_21_02.raw	3061	K.LVSDEM*VVELIEK.N	2	1	1222.6	3.647	0.4582	1519.79	0.87823	0.95	118	(Q9WTP6) KAD2_MOUSE Adenylate kinase isoenzyme 2, mitochondrial - Mus musculus	Q9WTP6
DBDB_21_03.raw	3145	K.LVSDEM*VVELIEK.N	2	1	1153.2	3.512	0.4116	1519.79	0.91817	0.86	8	(Q9WTP6) KAD2_MOUSE Adenylate kinase isoenzyme 2, mitochondrial - Mus musculus	Q9WTP6
DBDB_21_01.raw	3907	K.LVSDEMVVELIEK.N	2	1	1583.7	4.064	0.3078	1503.8	1.05028	0.93	111	(Q9WTP6) KAD2_MOUSE Adenylate kinase isoenzyme 2, mitochondrial - Mus musculus	Q9WTP6
DBDB_21_01.raw	4101	K.LVSDEMVVELIEK.N	2	1	1743.7	3.942	0.5241	1503.8	0.91612	0.91	38	(Q9WTP6) KAD2_MOUSE Adenylate kinase isoenzyme 2, mitochondrial - Mus musculus	Q9WTP6
DBDB_21_02.raw	3923	K.LVSDEMVVELIEK.N	2	1	1568.1	4.27	0.3243	1503.8	1.18965	0.92	119	(Q9WTP6) KAD2_MOUSE Adenylate kinase isoenzyme 2, mitochondrial - Mus musculus	Q9WTP6
DBDB_21_03.raw	3997	K.LVSDEMVVELIEK.N	2	1	1569.7	4.16	0.3186	1503.8	1.21917	0.97	138	(Q9WTP6) KAD2_MOUSE Adenylate kinase isoenzyme 2, mitochondrial - Mus musculus	Q9WTP6
DBDB_16_01.raw	3520	K.NGFLLDGFPR.T	2	1	996.6	2.616	0.154	1135.59	-	0.83	21	(Q9WTP6) KAD2_MOUSE Adenylate kinase isoenzyme 2, mitochondrial - Mus musculus	Q9WTP6
DBDB_16_01.raw	3643	K.NGFLLDGFPR.T	2	1	1427.2	2.652	0.1215	1135.59	-	0.83	29	(Q9WTP6) KAD2_MOUSE Adenylate kinase isoenzyme 2, mitochondrial - Mus musculus	Q9WTP6
DBDB_16_01.raw	3775	K.NGFLLDGFPR.T	2	1	1046.6	2.27	0.1619	1135.59	-	0.97	79	(Q9WTP6) KAD2_MOUSE Adenylate kinase isoenzyme 2, mitochondrial - Mus musculus	Q9WTP6
DBDB_16_02.raw	3534	K.NGFLLDGFPR.T	2	1	973.4	2.83	0.2403	1135.59	-	0.85	11	(Q9WTP6) KAD2_MOUSE Adenylate kinase isoenzyme 2, mitochondrial - Mus musculus	Q9WTP6
DBDB_16_02.raw	3657	K.NGFLLDGFPR.T	2	1	1434.8	2.826	0.2439	1135.59	-	0.97	140	(Q9WTP6) KAD2_MOUSE Adenylate kinase isoenzyme 2, mitochondrial - Mus musculus	Q9WTP6
DBDB_16_02.raw	3795	K.NGFLLDGFPR.T	2	1	1351.4	2.427	0.1361	1135.59	-	0.89	32	(Q9WTP6) KAD2_MOUSE Adenylate kinase isoenzyme 2, mitochondrial - Mus musculus	Q9WTP6
DBDB_16_03.raw	3478	K.NGFLLDGFPR.T	2	1	870.7	2.565	0.1768	1135.59	-	0.82	22	(Q9WTP6) KAD2_MOUSE Adenylate kinase isoenzyme 2, mitochondrial - Mus musculus	Q9WTP6
DBDB_16_03.raw	3601	K.NGFLLDGFPR.T	2	1	1472.8	2.963	0.2035	1135.59	-	0.97	31	(Q9WTP6) KAD2_MOUSE Adenylate kinase isoenzyme 2, mitochondrial - Mus musculus	Q9WTP6
DBDB_16_03.raw	3725	K.NGFLLDGFPR.T	2	1	1352.1	2.547	0.182	1135.59	-	0.98	142	(Q9WTP6) KAD2_MOUSE Adenylate kinase isoenzyme 2, mitochondrial - Mus musculus	Q9WTP6
DBDB_17_01.raw	3639	K.NGFLLDGFPR.T	2	1	1432.9	2.965	0.2166	1135.59	-	0.94	72	(Q9WTP6) KAD2_MOUSE Adenylate kinase isoenzyme 2, mitochondrial - Mus musculus	Q9WTP6
DBDB_17_01.raw	3766	K.NGFLLDGFPR.T	2	1	1212.7	2.651	0.1462	1135.59	-	0.76	49	(Q9WTP6) KAD2_MOUSE Adenylate kinase isoenzyme 2, mitochondrial - Mus musculus	Q9WTP6
DBDB_17_02.raw	3666	K.NGFLLDGFPR.T	2	1	1650.1	3.14	0.2137	1135.59	-	0.84	54	(Q9WTP6) KAD2_MOUSE Adenylate kinase isoenzyme 2, mitochondrial - Mus musculus	Q9WTP6
DBDB_17_02.raw	3814	K.NGFLLDGFPR.T	2	1	394.8	2.096	0.1331	1135.59	-	0.95	71	(Q9WTP6) KAD2_MOUSE Adenylate kinase isoenzyme 2, mitochondrial - Mus musculus	Q9WTP6
DBDB_17_03.raw	3635	K.NGFLLDGFPR.T	2	1	869.1	2.235	0.1776	1135.59	-	0.96	39	(Q9WTP6) KAD2_MOUSE Adenylate kinase isoenzyme 2, mitochondrial - Mus musculus	Q9WTP6
DBDB_17_03.raw	3765	K.NGFLLDGFPR.T	2	1	1475.9	3.057	0.2106	1135.59	-	0.77	7	(Q9WTP6) KAD2_MOUSE Adenylate kinase isoenzyme 2, mitochondrial - Mus musculus	Q9WTP6
DBDB_17_03.raw	3973	K.NGFLLDGFPR.T	2	1	1025.6	2.421	0.1878	1135.59	-	0.87	159	(Q9WTP6) KAD2_MOUSE Adenylate kinase isoenzyme 2, mitochondrial - Mus musculus	Q9WTP6
DBDB_21_01.raw	3562	K.NGFLLDGFPR.T	2	1	1735.5	2.731	0.1985	1135.59	-	0.7	37	(Q9WTP6) KAD2_MOUSE Adenylate kinase isoenzyme 2, mitochondrial - Mus musculus	Q9WTP6
DBDB_21_02.raw	3523	K.NGFLLDGFPR.T	2	1	1547.7	2.645	0.1613	1135.59	-	0.81	36	(Q9WTP6) KAD2_MOUSE Adenylate kinase isoenzyme 2, mitochondrial - Mus musculus	Q9WTP6
DBDB_21_03.raw	3610	K.NGFLLDGFPR.T	2	1	1389.9	2.601	0.1247	1135.59	-	0.98	188	(Q9WTP6) KAD2_MOUSE Adenylate kinase isoenzyme 2, mitochondrial - Mus musculus	Q9WTP6
DBDB_16_01.raw	3704	K.NGFLLDGFPR[.T	2	1	1124.5	2.719	0.1629	1139.59	-	0.98	242	(Q9WTP6) KAD2_MOUSE Adenylate kinase isoenzyme 2, mitochondrial - Mus musculus	Q9WTP6
DBDB_17_02.raw	3789	K.NGFLLDGFPR[.T	2	1	1396	3.083	0.2253	1139.59	-	0.94	49	(Q9WTP6) KAD2_MOUSE Adenylate kinase isoenzyme 2, mitochondrial - Mus musculus	Q9WTP6
DBDB_17_03.raw	3667	K.NGFLLDGFPR[.T	2	1	1411.6	2.911	0.18	1139.59	-	0.98	200	(Q9WTP6) KAD2_MOUSE Adenylate kinase isoenzyme 2, mitochondrial - Mus musculus	Q9WTP6
DBDB_17_03.raw	3825	K.NGFLLDGFPR[.T	2	1	1387.3	3.011	0.2425	1139.59	-	0.97	269	(Q9WTP6) KAD2_MOUSE Adenylate kinase isoenzyme 2, mitochondrial - Mus musculus	Q9WTP6
DBDB_30_01.raw	7202	R.GIHCAIDASQTPDIVFASILAAFSK.A	3	1	1086.3	4.036	0.3936	2632.35	0.56732	0.7	43	(Q9WTP6) KAD2_MOUSE Adenylate kinase isoenzyme 2, mitochondrial - Mus musculus	Q9WTP6
DBDB_30_01.raw	7324	R.GIHCAIDASQTPDIVFASILAAFSK.A	3	1	2282	4.207	0.4023	2632.35	0.77792	0.93	44	(Q9WTP6) KAD2_MOUSE Adenylate kinase isoenzyme 2, mitochondrial - Mus musculus	Q9WTP6
DBDB_30_01.raw	7451	R.GIHCAIDASQTPDIVFASILAAFSK.A	3	1	1860.2	4.514	0.4172	2632.35	0.62871	0.99	281	(Q9WTP6) KAD2_MOUSE Adenylate kinase isoenzyme 2, mitochondrial - Mus musculus	Q9WTP6
DBDB_30_02.raw	7253	R.GIHCAIDASQTPDIVFASILAAFSK.A	3	1	1573.8	3.962	0.324	2632.35	0.67708	0.97	91	(Q9WTP6) KAD2_MOUSE Adenylate kinase isoenzyme 2, mitochondrial - Mus musculus	Q9WTP6
DBDB_30_02.raw	7627	R.GIHCAIDASQTPDIVFASILAAFSK.A	3	1	1382.3	3.944	0.4432	2632.35	0.65848	0.92	8	(Q9WTP6) KAD2_MOUSE Adenylate kinase isoenzyme 2, mitochondrial - Mus musculus	Q9WTP6
DBDB_30_02.raw	7737	R.GIHCAIDASQTPDIVFASILAAFSK.A	3	1	1415.5	3.894	0.4108	2632.35	0.68736	0.98	8	(Q9WTP6) KAD2_MOUSE Adenylate kinase isoenzyme 2, mitochondrial - Mus musculus	Q9WTP6
DBDB_30_02.raw	7849	R.GIHCAIDASQTPDIVFASILAAFSK.A	3	1	764.5	3.728	0.3976	2632.35	0.70272	0.9	40	(Q9WTP6) KAD2_MOUSE Adenylate kinase isoenzyme 2, mitochondrial - Mus musculus	Q9WTP6
DBDB_30_02.raw	7976	R.GIHCAIDASQTPDIVFASILAAFSK.A	3	1	1768.7	4.525	0.4474	2632.35	0.61659	0.85	27	(Q9WTP6) KAD2_MOUSE Adenylate kinase isoenzyme 2, mitochondrial - Mus musculus	Q9WTP6
DBDB_30_02.raw	8374	R.GIHCAIDASQTPDIVFASILAAFSK.A	3	1	1833.3	3.543	0.2892	2632.35	-	0.98	159	(Q9WTP6) KAD2_MOUSE Adenylate kinase isoenzyme 2, mitochondrial - Mus musculus	Q9WTP6
DBDB_30_03.raw	7078	R.GIHCAIDASQTPDIVFASILAAFSK.A	3	1	1206.4	3.713	0.4595	2632.35	0.76275	0.9	39	(Q9WTP6) KAD2_MOUSE Adenylate kinase isoenzyme 2, mitochondrial - Mus musculus	Q9WTP6
DBDB_30_03.raw	7566	R.GIHCAIDASQTPDIVFASILAAFSK.A	3	1	2129.2	4.38	0.4318	2632.35	0.71342	0.9	47	(Q9WTP6) KAD2_MOUSE Adenylate kinase isoenzyme 2, mitochondrial - Mus musculus	Q9WTP6
DBDB_30_03.raw	7677	R.GIHCAIDASQTPDIVFASILAAFSK.A	3	1	1286.4	3.189	0.325	2632.35	-	0.89	59	(Q9WTP6) KAD2_MOUSE Adenylate kinase isoenzyme 2, mitochondrial - Mus musculus	Q9WTP6
DBDB_30_03.raw	7800	R.GIHCAIDASQTPDIVFASILAAFSK.A	3	1	1498.7	4.76	0.4431	2632.35	0.55432	0.94	50	(Q9WTP6) KAD2_MOUSE Adenylate kinase isoenzyme 2, mitochondrial - Mus musculus	Q9WTP6
DBDB_30_03.raw	7922	R.GIHCAIDASQTPDIVFASILAAFSK.A	3	1	2034.8	4.12	0.3381	2632.35	0.6991	0.96	125	(Q9WTP6) KAD2_MOUSE Adenylate kinase isoenzyme 2, mitochondrial - Mus musculus	Q9WTP6
DBDB_30_03.raw	8538	R.GIHCAIDASQTPDIVFASILAAFSK.A	3	1	737	3.031	0.2665	2632.35	-	0.95	93	(Q9WTP6) KAD2_MOUSE Adenylate kinase isoenzyme 2, mitochondrial - Mus musculus	Q9WTP6
DBDB_30_03.raw	8639	R.GIHCAIDASQTPDIVFASILAAFSK.A	3	1	1753.5	3.817	0.3746	2632.35	0.81091	0.91	40	(Q9WTP6) KAD2_MOUSE Adenylate kinase isoenzyme 2, mitochondrial - Mus musculus	Q9WTP6
DBDB_30_03.raw	8751	R.GIHCAIDASQTPDIVFASILAAFSK.A	3	1	913.6	3.738	0.2676	2632.35	-	0.92	72	(Q9WTP6) KAD2_MOUSE Adenylate kinase isoenzyme 2, mitochondrial - Mus musculus	Q9WTP6
DBDB_30_03.raw	7444	R.HPDEPVLLEEPVVLALAEK.H	3	1	1523.6	4.341	0.4652	2098.14	-	0.8	15	(Q9WTP6) KAD2_MOUSE Adenylate kinase isoenzyme 2, mitochondrial - Mus musculus	Q9WTP6
DBDB_34_01.raw	2603	R.LEAYHTQTTPLVEYYR.K	3	1	1004.9	3.423	0.4027	1983.98	0.89547	0.7	8	(Q9WTP6) KAD2_MOUSE Adenylate kinase isoenzyme 2, mitochondrial - Mus musculus	Q9WTP6
DBDB_34_03.raw	2612	R.LEAYHTQTTPLVEYYR.K	3	1	1342.5	4.551	0.3442	1983.98	0.69759	0.57	30	(Q9WTP6) KAD2_MOUSE Adenylate kinase isoenzyme 2, mitochondrial - Mus musculus	Q9WTP6
DBDB_04_01.raw	2036	R.QAEMLDDLM*EK[.R	2	1	1015.8	3.447	0.2945	1342.59	-	0.92	64	(Q9WTP6) KAD2_MOUSE Adenylate kinase isoenzyme 2, mitochondrial - Mus musculus	Q9WTP6
DBDB_43_03.raw	1288	R.SYHEEFNPPK.E	3	1	1109.6	3.6	0.2389	1247.57	1.26634	0.95	153	(Q9WTP6) KAD2_MOUSE Adenylate kinase isoenzyme 2, mitochondrial - Mus musculus	Q9WTP6
DBDB_43_01.raw	1279	R.SYHEEFNPPK[.E	2	1	395.5	2.537	0.2022	1251.57	1.2514	0.91	8	(Q9WTP6) KAD2_MOUSE Adenylate kinase isoenzyme 2, mitochondrial - Mus musculus	Q9WTP6
DBDB_43_02.raw	1248	R.SYHEEFNPPK[.E	2	1	525.3	3.105	0.3669	1251.57	1.1329	0.95	91	(Q9WTP6) KAD2_MOUSE Adenylate kinase isoenzyme 2, mitochondrial - Mus musculus	Q9WTP6
DBDB_51_01.raw	2918	R.SYHEEFNPPKEPMKDDITGEPLIR[.R	4	1	826.2	3.653	0.157	2846.37	-	0.96	127	(Q9WTP6) KAD2_MOUSE Adenylate kinase isoenzyme 2, mitochondrial - Mus musculus	Q9WTP6
DBDB_20_02.raw	1173	R.DQAVMISGESGAGK.T	2	1	1604.8	3.852	0.4604	1349.64	1.10887	0.96	99	(Q9WTI7) MYO1C_MOUSE Myosin-Ic - Mus musculus (Mouse)	Q9WTI7	0.98091	0.180963
DBDB_23_02.raw	2330	R.LLQFYAETCPAPER.G	2	1	1520.6	3.359	0.426	1694.83	0.85295	0.9	41	(Q9WTI7) MYO1C_MOUSE Myosin-Ic - Mus musculus (Mouse)	Q9WTI7
DBDB_23_01.raw	3054	R.LLQSNPVLEAFGNAK[.T	2	1	1245.9	3.331	0.35	1604.87	-	0.96	94	(Q9WTI7) MYO1C_MOUSE Myosin-Ic - Mus musculus (Mouse)	Q9WTI7
DBDB_31_01.raw	2427	K.FATVEVTDKPVDEALR.E	2	1	1217.8	4.159	0.507	1789.93	0.75799	0.96	1	(Q9R257) HEBP1_MOUSE Heme-binding protein 1 - Mus musculus (Mouse)	Q9R257	0.587627	0.150714
DBDB_31_03.raw	2487	K.FATVEVTDKPVDEALR.E	2	1	1296.7	4.448	0.4724	1789.93	0.66481	0.97	94	(Q9R257) HEBP1_MOUSE Heme-binding protein 1 - Mus musculus (Mouse)	Q9R257
DBDB_31_03.raw	2514	K.FATVEVTDKPVDEALR.E	3	1	936.8	3.05	0.4646	1789.93	0.42833	0.98	217	(Q9R257) HEBP1_MOUSE Heme-binding protein 1 - Mus musculus (Mouse)	Q9R257
DBDB_31_02.raw	2498	K.FATVEVTDKPVDEALR[.E	3	1	704	3.362	0.4592	1793.93	0.49938	0.86	24	(Q9R257) HEBP1_MOUSE Heme-binding protein 1 - Mus musculus (Mouse)	Q9R257
DBDB_15_01.raw	5445	R.NSLFGSVETWPWQVLSTGGK.E	3	1	1230	3.337	0.2075	2193.1	-	0.96	71	(Q9R257) HEBP1_MOUSE Heme-binding protein 1 - Mus musculus (Mouse)	Q9R257
DBDB_15_02.raw	5418	R.NSLFGSVETWPWQVLSTGGK.E	3	1	1323.8	3.713	0.3187	2193.1	-	0.87	4	(Q9R257) HEBP1_MOUSE Heme-binding protein 1 - Mus musculus (Mouse)	Q9R257
DBDB_26_02.raw	3627	K.GLTM*LDHEQVSPEDPGAQFLIQTGSVGR.N	3	1	702.8	3.886	0.3375	2998.46	-	0.66	16	(Q9R1T2) SAE1_MOUSE SUMO-activating enzyme subunit 1 - Mus musculus (Mouse)	Q9R1T2	1.02033	0.352698
DBDB_26_01.raw	3973	K.GLTMLDHEQVSPEDPGAQFLIQTGSVGR.N	3	1	1062.2	4.194	0.4426	2982.46	0.62599	0.87	11	(Q9R1T2) SAE1_MOUSE SUMO-activating enzyme subunit 1 - Mus musculus (Mouse)	Q9R1T2
DBDB_18_01.raw	5440	R.NDVFDSLGISPDLLPDDFVR.Y	2	1	614.1	3.315	0.3039	2234.1	1.12935	0.96	84	(Q9R1T2) SAE1_MOUSE SUMO-activating enzyme subunit 1 - Mus musculus (Mouse)	Q9R1T2
DBDB_18_03.raw	5428	R.NDVFDSLGISPDLLPDDFVR.Y	2	1	649.5	3.235	0.2115	2234.1	1.30564	0.91	16	(Q9R1T2) SAE1_MOUSE SUMO-activating enzyme subunit 1 - Mus musculus (Mouse)	Q9R1T2
DBDB_21_01.raw	1652	R.ETLPAEQDLTTK.N	2	1	333.9	2.876	0.4741	1345.68	0.86948	0.96	69	(Q9R1P4) PSA1_MOUSE Proteasome subunit alpha type-1 - Mus musculus (Mouse)	Q9R1P4	0.85214	0.0245225
DBDB_21_03.raw	1671	R.ETLPAEQDLTTK.N	2	1	330.2	2.834	0.4986	1345.68	0.8348	0.97	94	(Q9R1P4) PSA1_MOUSE Proteasome subunit alpha type-1 - Mus musculus (Mouse)	Q9R1P4
DBDB_16_01.raw	2810	R.NGYELSPTAAANFTR.R	2	1	1299.7	3.158	0.1455	1611.78	1.59046	0.9	3	(Q9R1P3) PSB2_MOUSE Proteasome subunit beta type-2 - Mus musculus (Mouse)	Q9R1P3	1.59046	NA
DBDB_16_02.raw	2866	R.NGYELSPTAAANFTR.R	2	1	1187.5	2.789	0.2392	1611.78	-	0.95	101	(Q9R1P3) PSB2_MOUSE Proteasome subunit beta type-2 - Mus musculus (Mouse)	Q9R1P3
DBDB_32_01.raw	1659	K.DLVAQAPLKPK.T	2	1	882	3.087	0.4065	1179.71	1.12006	0.98	147	(Q9R190) MTA2_MOUSE Metastasis-associated protein MTA2 - Mus musculus (Mouse)	Q9R190	1.12006	NA
DBDB_24_03.raw	1702	K.TAAAVAAQSGILDR.T	2	1	2656.5	3.86	0.4053	1343.73	1.25875	0.52	3	(Q9R112) SQRD_MOUSE Sulfide:quinone oxidoreductase, mitochondrial precursor -	Q9R112	1.01835	0.245751
DBDB_24_02.raw	1592	K.TAAAVAAQSGILDR[.T	2	1	2118.2	5.058	0.4472	1347.73	1.30003	0.97	167	(Q9R112) SQRD_MOUSE Sulfide:quinone oxidoreductase, mitochondrial precursor -	Q9R112
DBDB_25_03.raw	2700	K.YADALQEIIR.E	2	1	1882.6	3.611	0.3934	1191.64	0.97959	0.91	6	(Q9R112) SQRD_MOUSE Sulfide:quinone oxidoreductase, mitochondrial precursor -	Q9R112
DBDB_25_01.raw	2688	K.YADALQEIIR[.E	2	1	1865.6	3.478	0.3182	1195.64	1.06025	0.71	5	(Q9R112) SQRD_MOUSE Sulfide:quinone oxidoreductase, mitochondrial precursor -	Q9R112
DBDB_25_02.raw	2812	K.YADALQEIIR[.E	2	1	591.4	2.034	0.161	1195.64	-	0.82	8	(Q9R112) SQRD_MOUSE Sulfide:quinone oxidoreductase, mitochondrial precursor -	Q9R112
DBDB_22_01.raw	1769	R.VGAENVAIVEPSER.H	2	1	883.7	3.25	0.3444	1469.76	0.72044	0.98	133	(Q9R112) SQRD_MOUSE Sulfide:quinone oxidoreductase, mitochondrial precursor -	Q9R112
DBDB_22_02.raw	1801	R.VGAENVAIVEPSER.H	2	1	1048.3	3.574	0.226	1469.76	0.78084	0.96	126	(Q9R112) SQRD_MOUSE Sulfide:quinone oxidoreductase, mitochondrial precursor -	Q9R112
DBDB_22_03.raw	1762	R.VGAENVAIVEPSER.H	2	1	1312.9	3.89	0.3753	1469.76	0.7616	0.86	16	(Q9R112) SQRD_MOUSE Sulfide:quinone oxidoreductase, mitochondrial precursor -	Q9R112
DBDB_23_03.raw	1739	R.VGAENVAIVEPSER.H	2	1	1433.2	3.874	0.5097	1469.76	1.28533	0.95	19	(Q9R112) SQRD_MOUSE Sulfide:quinone oxidoreductase, mitochondrial precursor -	Q9R112
DBDB_21_02.raw	4492	K.GELVPLDTVLDM*LR.D	2	1	674	3.956	0.4195	1586.85	0.87757	0.96	106	(Q9R0Y5) KAD1_MOUSE Adenylate kinase isoenzyme 1 - Mus musculus (Mouse)	Q9R0Y5	0.927289	0.128659
DBDB_21_03.raw	4642	K.GELVPLDTVLDM*LR[.D	2	1	639.2	4.106	0.3853	1590.85	1.00072	0.98	132	(Q9R0Y5) KAD1_MOUSE Adenylate kinase isoenzyme 1 - Mus musculus (Mouse)	Q9R0Y5
DBDB_21_01.raw	5423	K.GELVPLDTVLDMLR.D	2	1	372.2	2.37	0.3467	1570.85	0.80972	0.86	60	(Q9R0Y5) KAD1_MOUSE Adenylate kinase isoenzyme 1 - Mus musculus (Mouse)	Q9R0Y5
DBDB_21_02.raw	5384	K.GELVPLDTVLDMLR.D	2	1	405.2	2.964	0.4078	1570.85	1.16332	0.94	34	(Q9R0Y5) KAD1_MOUSE Adenylate kinase isoenzyme 1 - Mus musculus (Mouse)	Q9R0Y5
DBDB_21_03.raw	5529	K.GELVPLDTVLDMLR.D	3	1	746.6	3.282	0.3123	1570.85	0.78871	0.9	29	(Q9R0Y5) KAD1_MOUSE Adenylate kinase isoenzyme 1 - Mus musculus (Mouse)	Q9R0Y5
DBDB_21_01.raw	5411	K.GELVPLDTVLDMLR[.D	3	1	685.5	4.119	0.3821	1574.85	0.88867	0.95	54	(Q9R0Y5) KAD1_MOUSE Adenylate kinase isoenzyme 1 - Mus musculus (Mouse)	Q9R0Y5
DBDB_21_01.raw	5472	K.GELVPLDTVLDMLR[.D	2	1	515.4	2.619	0.1998	1574.85	0.96231	0.89	2	(Q9R0Y5) KAD1_MOUSE Adenylate kinase isoenzyme 1 - Mus musculus (Mouse)	Q9R0Y5
DBDB_20_02.raw	2709	K.VDSSNGFLIDGYPR.E	2	1	1074.9	2.259	0.3017	1539.74	-	0.85	9	(Q9R0Y5) KAD1_MOUSE Adenylate kinase isoenzyme 1 - Mus musculus (Mouse)	Q9R0Y5
DBDB_30_02.raw	3760	K.GPAFVNPLIPENKEEEELFK.Q	3	1	657.3	4.043	0.3555	2300.18	0.48598	0.68	7	(Q9R0X4) ACOT9_MOUSE Acyl-coenzyme A thioesterase 9, mitochondrial precursor -	Q9R0X4	1.03678	0.477656
DBDB_54_02.raw	2306	K.ISEPLHIHQVR[.D	2	1	484.6	2.667	0.3963	1332.74	-	0.81	111	(Q9R0X4) ACOT9_MOUSE Acyl-coenzyme A thioesterase 9, mitochondrial precursor -	Q9R0X4
DBDB_36_03.raw	5097	R.HIADLAGNPEVILPVPAFNVINGGSHAGNK[.L	3	1	3250.5	6.716	0.5226	3025.59	-	0.84	73	(Q9R0X4) ACOT9_MOUSE Acyl-coenzyme A thioesterase 9, mitochondrial precursor -	Q9R0X4
DBDB_36_01.raw	4997	R.NIIHELFLTTLDPK[.T	2	1	883.3	3.32	0.3893	1657.92	1.33703	0.98	139	(Q9R0X4) ACOT9_MOUSE Acyl-coenzyme A thioesterase 9, mitochondrial precursor -	Q9R0X4
DBDB_36_03.raw	5013	R.NIIHELFLTTLDPK[.T	2	1	660.6	2.539	0.2366	1657.92	1.28734	0.93	23	(Q9R0X4) ACOT9_MOUSE Acyl-coenzyme A thioesterase 9, mitochondrial precursor -	Q9R0X4
DBDB_21_01.raw	4490	R.YGPIVDVYVPLDFYTR[.R	2	1	741.3	2.902	0.1443	1920.98	-	0.98	185	(Q9R0U0) FUSIP_MOUSE FUS-interacting serine-arginine-rich protein 1 - Mus musc	Q9R0U0	NA	NA
DBDB_46_01.raw	3436	K.HLNEIDLFHCIDPNDSK.H	3	1	800.4	4.071	0.4841	2066.97	1.40422	0.96	38	(Q9R0Q7) TEBP_MOUSE Prostaglandin E synthase 3 - Mus musculus (Mouse)	Q9R0Q7	1.28923	0.221058
DBDB_46_01.raw	3556	K.HLNEIDLFHCIDPNDSK.H	3	1	910.2	3.382	0.4362	2066.97	1.26877	0.83	19	(Q9R0Q7) TEBP_MOUSE Prostaglandin E synthase 3 - Mus musculus (Mouse)	Q9R0Q7
DBDB_46_01.raw	3675	K.HLNEIDLFHCIDPNDSK.H	3	1	622.4	3.005	0.327	2066.97	1.29046	0.92	25	(Q9R0Q7) TEBP_MOUSE Prostaglandin E synthase 3 - Mus musculus (Mouse)	Q9R0Q7
DBDB_46_03.raw	3321	K.HLNEIDLFHCIDPNDSK.H	3	1	1066.8	3.627	0.3344	2066.97	1.34268	0.95	43	(Q9R0Q7) TEBP_MOUSE Prostaglandin E synthase 3 - Mus musculus (Mouse)	Q9R0Q7
DBDB_46_03.raw	3443	K.HLNEIDLFHCIDPNDSK.H	3	1	1223.8	4.01	0.4469	2066.97	1.41461	0.82	25	(Q9R0Q7) TEBP_MOUSE Prostaglandin E synthase 3 - Mus musculus (Mouse)	Q9R0Q7
DBDB_46_03.raw	3566	K.HLNEIDLFHCIDPNDSK.H	3	1	847.6	3.67	0.3868	2066.97	1.39838	0.92	45	(Q9R0Q7) TEBP_MOUSE Prostaglandin E synthase 3 - Mus musculus (Mouse)	Q9R0Q7
DBDB_46_01.raw	3442	K.HLNEIDLFHCIDPNDSK[.H	3	1	879.9	3.705	0.462	2070.97	-	0.67	19	(Q9R0Q7) TEBP_MOUSE Prostaglandin E synthase 3 - Mus musculus (Mouse)	Q9R0Q7
DBDB_46_02.raw	3301	K.HLNEIDLFHCIDPNDSK[.H	3	1	913.4	4.765	0.4644	2070.97	1.46918	0.82	44	(Q9R0Q7) TEBP_MOUSE Prostaglandin E synthase 3 - Mus musculus (Mouse)	Q9R0Q7
DBDB_46_02.raw	3427	K.HLNEIDLFHCIDPNDSK[.H	3	1	794.7	4.122	0.467	2070.97	1.73367	0.96	52	(Q9R0Q7) TEBP_MOUSE Prostaglandin E synthase 3 - Mus musculus (Mouse)	Q9R0Q7
DBDB_46_03.raw	3417	K.HLNEIDLFHCIDPNDSK[.H	3	1	879.6	4.5	0.4848	2070.97	-	0.84	22	(Q9R0Q7) TEBP_MOUSE Prostaglandin E synthase 3 - Mus musculus (Mouse)	Q9R0Q7
DBDB_46_03.raw	3688	K.HLNEIDLFHCIDPNDSK[.H	3	1	664.6	3.029	0.3353	2070.97	-	0.62	7	(Q9R0Q7) TEBP_MOUSE Prostaglandin E synthase 3 - Mus musculus (Mouse)	Q9R0Q7
DBDB_46_03.raw	3807	K.HLNEIDLFHCIDPNDSK[.H	3	1	843.2	3.318	0.3719	2070.97	1.03687	0.94	83	(Q9R0Q7) TEBP_MOUSE Prostaglandin E synthase 3 - Mus musculus (Mouse)	Q9R0Q7
DBDB_46_03.raw	4053	K.HLNEIDLFHCIDPNDSK[.H	3	1	1066.8	3.231	0.3169	2070.97	-	0.97	126	(Q9R0Q7) TEBP_MOUSE Prostaglandin E synthase 3 - Mus musculus (Mouse)	Q9R0Q7
DBDB_25_01.raw	2523	K.LTFSCLGGSDNFK.H	2	1	1024.1	2.87	0.4291	1445.68	1.1157	0.98	143	(Q9R0Q7) TEBP_MOUSE Prostaglandin E synthase 3 - Mus musculus (Mouse)	Q9R0Q7
DBDB_25_02.raw	2518	K.LTFSCLGGSDNFK.H	2	1	668.2	2.415	0.1981	1445.68	1.00814	0.94	28	(Q9R0Q7) TEBP_MOUSE Prostaglandin E synthase 3 - Mus musculus (Mouse)	Q9R0Q7
DBDB_25_03.raw	2520	K.LTFSCLGGSDNFK[.H	2	1	1083.3	3.241	0.4695	1449.68	0.9881	0.84	56	(Q9R0Q7) TEBP_MOUSE Prostaglandin E synthase 3 - Mus musculus (Mouse)	Q9R0Q7
DBDB_30_02.raw	1278	K.NEAIQAAHDSVAQEGQCR.V	3	1	1090.9	3.811	0.2898	1983.9	-	0.97	107	(Q9R0P9) UCHL1_MOUSE Ubiquitin carboxyl-terminal hydrolase isozyme L1 - Mus mu	Q9R0P9	NA	NA
DBDB_34_01.raw	1642	K.NEAIQAAHDSVAQEGQCR.V	3	1	1219	3.951	0.3787	1983.9	-	0.96	51	(Q9R0P9) UCHL1_MOUSE Ubiquitin carboxyl-terminal hydrolase isozyme L1 - Mus mu	Q9R0P9
DBDB_23_01.raw	4302	-.MLSLDFLDDVR[.R	2	1	1102.5	2.869	0.4224	1327.66	-	0.93	81	(Q9R0P6) SC11A_MOUSE Signal peptidase complex catalytic subunit SEC11A - Mus m	Q9R0P6	NA	NA
DBDB_20_01.raw	3420	K.EILVGDVGATITDPFK.H	2	1	2992.7	5.595	0.5504	1674.89	-	0.97	243	(Q9R0P5) DEST_MOUSE Destrin - Mus musculus (Mouse)	Q9R0P5	0.947963	0.182885
DBDB_20_01.raw	3458	K.EILVGDVGATITDPFK.H	3	1	612.5	3.519	0.5095	1674.89	0.88181	0.79	55	(Q9R0P5) DEST_MOUSE Destrin - Mus musculus (Mouse)	Q9R0P5
DBDB_20_01.raw	3549	K.EILVGDVGATITDPFK.H	2	1	2577.8	5.347	0.5425	1674.89	0.76341	0.9	11	(Q9R0P5) DEST_MOUSE Destrin - Mus musculus (Mouse)	Q9R0P5
DBDB_20_01.raw	3778	K.EILVGDVGATITDPFK.H	2	1	2175.2	4.412	0.5088	1674.89	-	0.69	35	(Q9R0P5) DEST_MOUSE Destrin - Mus musculus (Mouse)	Q9R0P5
DBDB_20_01.raw	6010	K.EILVGDVGATITDPFK.H	2	1	1462.9	3.677	0.5147	1674.89	-	0.96	96	(Q9R0P5) DEST_MOUSE Destrin - Mus musculus (Mouse)	Q9R0P5
DBDB_20_02.raw	3916	K.EILVGDVGATITDPFK.H	2	1	2691.7	5.34	0.5787	1674.89	0.74703	0.93	86	(Q9R0P5) DEST_MOUSE Destrin - Mus musculus (Mouse)	Q9R0P5
DBDB_20_02.raw	4049	K.EILVGDVGATITDPFK.H	2	1	2974.7	5.111	0.5918	1674.89	0.84909	0.74	32	(Q9R0P5) DEST_MOUSE Destrin - Mus musculus (Mouse)	Q9R0P5
DBDB_20_02.raw	5344	K.EILVGDVGATITDPFK.H	2	1	1192.6	3.751	0.5189	1674.89	1.16445	0.89	84	(Q9R0P5) DEST_MOUSE Destrin - Mus musculus (Mouse)	Q9R0P5
DBDB_20_02.raw	5665	K.EILVGDVGATITDPFK.H	2	1	1426.6	3.926	0.5002	1674.89	1.0634	0.98	114	(Q9R0P5) DEST_MOUSE Destrin - Mus musculus (Mouse)	Q9R0P5
DBDB_20_02.raw	6328	K.EILVGDVGATITDPFK.H	2	1	902	4.072	0.5185	1674.89	-	0.98	70	(Q9R0P5) DEST_MOUSE Destrin - Mus musculus (Mouse)	Q9R0P5
DBDB_20_02.raw	6554	K.EILVGDVGATITDPFK.H	2	1	1048.6	3.927	0.4833	1674.89	-	0.84	7	(Q9R0P5) DEST_MOUSE Destrin - Mus musculus (Mouse)	Q9R0P5
DBDB_20_03.raw	3991	K.EILVGDVGATITDPFK.H	2	1	2374.4	5.183	0.566	1674.89	0.87478	0.95	53	(Q9R0P5) DEST_MOUSE Destrin - Mus musculus (Mouse)	Q9R0P5
DBDB_20_03.raw	4113	K.EILVGDVGATITDPFK.H	2	1	2572.8	5.245	0.6011	1674.89	0.65059	0.98	216	(Q9R0P5) DEST_MOUSE Destrin - Mus musculus (Mouse)	Q9R0P5
DBDB_20_03.raw	4247	K.EILVGDVGATITDPFK.H	2	1	2813.8	5.031	0.5978	1674.89	0.87077	0.78	49	(Q9R0P5) DEST_MOUSE Destrin - Mus musculus (Mouse)	Q9R0P5
DBDB_20_03.raw	4277	K.EILVGDVGATITDPFK.H	2	1	984.4	2.822	0.2084	1674.89	-	0.47	49	(Q9R0P5) DEST_MOUSE Destrin - Mus musculus (Mouse)	Q9R0P5
DBDB_20_03.raw	4408	K.EILVGDVGATITDPFK.H	2	1	740.3	3.007	0.4243	1674.89	0.75777	0.95	130	(Q9R0P5) DEST_MOUSE Destrin - Mus musculus (Mouse)	Q9R0P5
DBDB_20_03.raw	7085	K.EILVGDVGATITDPFK.H	2	1	564.2	2.66	0.3802	1674.89	-	0.91	22	(Q9R0P5) DEST_MOUSE Destrin - Mus musculus (Mouse)	Q9R0P5
DBDB_20_01.raw	5446	K.EILVGDVGATITDPFK[.H	2	1	1729.7	2.624	0.3204	1678.89	1.0131	0.97	170	(Q9R0P5) DEST_MOUSE Destrin - Mus musculus (Mouse)	Q9R0P5
DBDB_20_01.raw	5792	K.EILVGDVGATITDPFK[.H	2	1	530.6	2.133	0.1365	1678.89	-	0.74	23	(Q9R0P5) DEST_MOUSE Destrin - Mus musculus (Mouse)	Q9R0P5
DBDB_20_02.raw	4335	K.EILVGDVGATITDPFK[.H	2	1	3081.6	4.846	0.5171	1678.89	1.11439	0.97	166	(Q9R0P5) DEST_MOUSE Destrin - Mus musculus (Mouse)	Q9R0P5
DBDB_20_02.raw	5818	K.EILVGDVGATITDPFK[.H	2	1	2020.5	3.725	0.4274	1678.89	1.12367	0.98	146	(Q9R0P5) DEST_MOUSE Destrin - Mus musculus (Mouse)	Q9R0P5
DBDB_20_02.raw	6854	K.EILVGDVGATITDPFK[.H	2	1	1276.2	3.01	0.4751	1678.89	0.86308	0.95	33	(Q9R0P5) DEST_MOUSE Destrin - Mus musculus (Mouse)	Q9R0P5
DBDB_20_03.raw	4115	K.EILVGDVGATITDPFK[.H	2	1	2720.5	5.842	0.5297	1678.89	0.75698	0.93	28	(Q9R0P5) DEST_MOUSE Destrin - Mus musculus (Mouse)	Q9R0P5
DBDB_20_03.raw	5381	K.EILVGDVGATITDPFK[.H	2	1	1306.4	2.489	0.1525	1678.89	-	0.95	72	(Q9R0P5) DEST_MOUSE Destrin - Mus musculus (Mouse)	Q9R0P5
DBDB_20_03.raw	5522	K.EILVGDVGATITDPFK[.H	2	1	1519.1	3.32	0.3773	1678.89	1.0479	0.97	72	(Q9R0P5) DEST_MOUSE Destrin - Mus musculus (Mouse)	Q9R0P5
DBDB_20_03.raw	5652	K.EILVGDVGATITDPFK[.H	2	1	1670.9	3.716	0.4015	1678.89	0.80824	0.98	147	(Q9R0P5) DEST_MOUSE Destrin - Mus musculus (Mouse)	Q9R0P5
DBDB_20_03.raw	5815	K.EILVGDVGATITDPFK[.H	2	1	1718.9	4.2	0.4397	1678.89	0.88927	0.94	8	(Q9R0P5) DEST_MOUSE Destrin - Mus musculus (Mouse)	Q9R0P5
DBDB_20_03.raw	6679	K.EILVGDVGATITDPFK[.H	2	1	868.2	3.239	0.344	1678.89	0.91529	0.86	23	(Q9R0P5) DEST_MOUSE Destrin - Mus musculus (Mouse)	Q9R0P5
DBDB_37_01.raw	1293	K.HEYQANGPEDLNR.T	2	1	1700.4	3.038	0.2426	1542.69	-	0.96	156	(Q9R0P5) DEST_MOUSE Destrin - Mus musculus (Mouse)	Q9R0P5
DBDB_37_03.raw	1275	K.HEYQANGPEDLNR.T	2	1	1729.3	2.934	0.1218	1542.69	-	0.98	92	(Q9R0P5) DEST_MOUSE Destrin - Mus musculus (Mouse)	Q9R0P5
DBDB_45_03.raw	1361	K.HFVGM*LPEK.D	2	2	374.6	2.25	0.3115	1073.54	1.02229	0.97	126	(Q9R0P5) DEST_MOUSE Destrin - Mus musculus (Mouse)	Q9R0P5
DBDB_45_01.raw	1640	K.HFVGMLPEK.D	2	1	579.9	2.017	0.3547	1057.55	1.4509	0.54	5	(Q9R0P5) DEST_MOUSE Destrin - Mus musculus (Mouse)	Q9R0P5
DBDB_45_02.raw	1645	K.HFVGMLPEK[.D	2	1	1036.4	2.895	0.4434	1061.55	1.27679	0.88	8	(Q9R0P5) DEST_MOUSE Destrin - Mus musculus (Mouse)	Q9R0P5
DBDB_45_03.raw	1633	K.HFVGMLPEK[.D	2	2	646.1	2.697	0.3857	1061.55	0.97783	0.83	54	(Q9R0P5) DEST_MOUSE Destrin - Mus musculus (Mouse)	Q9R0P5
DBDB_24_01.raw	2183	R.YALYDASFETK[.E	2	1	956.2	2.427	0.1324	1311.62	0.8496	0.79	10	(Q9R0P5) DEST_MOUSE Destrin - Mus musculus (Mouse)	Q9R0P5
DBDB_24_03.raw	2213	R.YALYDASFETK[.E	2	1	905.7	2.711	0.3213	1311.62	0.96665	0.94	79	(Q9R0P5) DEST_MOUSE Destrin - Mus musculus (Mouse)	Q9R0P5
DBDB_22_02.raw	2765	K.AYSGSQIDILIDQGK.D	2	1	547.1	2.637	0.1485	1607.83	0.72105	0.96	48	(Q9R0P3) ESTD_MOUSE S-formylglutathione hydrolase - Mus musculus (Mouse)	Q9R0P3	0.931377	0.213169
DBDB_15_01.raw	4338	K.DDEFLSNGQLLPDNFIAACTEK.K	2	1	1144.1	4.112	0.4186	2497.16	-	0.91	13	(Q9R0P3) ESTD_MOUSE S-formylglutathione hydrolase - Mus musculus (Mouse)	Q9R0P3
DBDB_15_02.raw	4359	K.DDEFLSNGQLLPDNFIAACTEK.K	2	1	880.4	3.968	0.3511	2497.16	-	0.92	17	(Q9R0P3) ESTD_MOUSE S-formylglutathione hydrolase - Mus musculus (Mouse)	Q9R0P3
DBDB_15_03.raw	4214	K.DDEFLSNGQLLPDNFIAACTEK.K	2	1	887.2	3.767	0.2469	2497.16	-	0.94	16	(Q9R0P3) ESTD_MOUSE S-formylglutathione hydrolase - Mus musculus (Mouse)	Q9R0P3
DBDB_15_03.raw	4337	K.DDEFLSNGQLLPDNFIAACTEK.K	2	1	928.1	3.833	0.3801	2497.16	-	0.83	37	(Q9R0P3) ESTD_MOUSE S-formylglutathione hydrolase - Mus musculus (Mouse)	Q9R0P3
DBDB_16_01.raw	4407	K.DDEFLSNGQLLPDNFIAACTEK.K	2	1	786.8	4.12	0.4414	2497.16	-	0.82	54	(Q9R0P3) ESTD_MOUSE S-formylglutathione hydrolase - Mus musculus (Mouse)	Q9R0P3
DBDB_16_03.raw	4422	K.DDEFLSNGQLLPDNFIAACTEK.K	2	1	916.3	4.27	0.4666	2497.16	-	0.95	58	(Q9R0P3) ESTD_MOUSE S-formylglutathione hydrolase - Mus musculus (Mouse)	Q9R0P3
DBDB_15_01.raw	4457	K.DDEFLSNGQLLPDNFIAACTEK[.K	2	1	587	4.204	0.3811	2501.16	-	0.97	145	(Q9R0P3) ESTD_MOUSE S-formylglutathione hydrolase - Mus musculus (Mouse)	Q9R0P3
DBDB_16_01.raw	4274	K.DDEFLSNGQLLPDNFIAACTEK[.K	2	1	1161.3	6.296	0.5707	2501.16	1.20589	0.92	28	(Q9R0P3) ESTD_MOUSE S-formylglutathione hydrolase - Mus musculus (Mouse)	Q9R0P3
DBDB_16_02.raw	4296	K.DDEFLSNGQLLPDNFIAACTEK[.K	2	1	932	6.327	0.5614	2501.16	1.21167	0.97	240	(Q9R0P3) ESTD_MOUSE S-formylglutathione hydrolase - Mus musculus (Mouse)	Q9R0P3
DBDB_16_02.raw	4419	K.DDEFLSNGQLLPDNFIAACTEK[.K	2	1	525.8	3.438	0.1251	2501.16	-	0.98	242	(Q9R0P3) ESTD_MOUSE S-formylglutathione hydrolase - Mus musculus (Mouse)	Q9R0P3
DBDB_16_03.raw	4300	K.DDEFLSNGQLLPDNFIAACTEK[.K	2	1	803.9	5.914	0.4956	2501.16	1.39735	0.95	75	(Q9R0P3) ESTD_MOUSE S-formylglutathione hydrolase - Mus musculus (Mouse)	Q9R0P3
DBDB_40_01.raw	1457	K.VFEHSSVELK.C	2	2	301.7	2.34	0.3796	1174.61	0.96863	0.95	126	(Q9R0P3) ESTD_MOUSE S-formylglutathione hydrolase - Mus musculus (Mouse)	Q9R0P3
DBDB_40_02.raw	1465	K.VFEHSSVELK.C	2	2	368.2	2.035	0.152	1174.61	1.10176	0.86	22	(Q9R0P3) ESTD_MOUSE S-formylglutathione hydrolase - Mus musculus (Mouse)	Q9R0P3
DBDB_40_03.raw	1472	K.VFEHSSVELK.C	2	1	411.2	2.178	0.3163	1174.61	0.86119	0.9	36	(Q9R0P3) ESTD_MOUSE S-formylglutathione hydrolase - Mus musculus (Mouse)	Q9R0P3
DBDB_23_02.raw	2200	R.FAVYLPPQAESGK.C	2	1	458.9	2.448	0.2849	1406.73	0.76392	0.88	9	(Q9R0P3) ESTD_MOUSE S-formylglutathione hydrolase - Mus musculus (Mouse)	Q9R0P3
DBDB_19_02.raw	4572	R.M*YSYVTEELPQLINANFPVDPQR.M	2	1	622.6	3.48	0.6246	2740.33	0.94266	0.81	3	(Q9R0P3) ESTD_MOUSE S-formylglutathione hydrolase - Mus musculus (Mouse)	Q9R0P3
DBDB_19_03.raw	4603	R.M*YSYVTEELPQLINANFPVDPQR.M	2	1	568.3	3.407	0.6132	2740.33	1.12659	0.98	160	(Q9R0P3) ESTD_MOUSE S-formylglutathione hydrolase - Mus musculus (Mouse)	Q9R0P3
DBDB_19_01.raw	4613	R.M*YSYVTEELPQLINANFPVDPQR[.M	2	1	560.3	3.168	0.3595	2744.33	1.09233	0.98	102	(Q9R0P3) ESTD_MOUSE S-formylglutathione hydrolase - Mus musculus (Mouse)	Q9R0P3
DBDB_19_02.raw	4570	R.M*YSYVTEELPQLINANFPVDPQR[.M	3	1	722.4	3.653	0.2891	2744.33	1.03297	0.68	17	(Q9R0P3) ESTD_MOUSE S-formylglutathione hydrolase - Mus musculus (Mouse)	Q9R0P3
DBDB_19_03.raw	4575	R.M*YSYVTEELPQLINANFPVDPQR[.M	2	1	754.6	3.835	0.4513	2744.33	0.98526	0.98	186	(Q9R0P3) ESTD_MOUSE S-formylglutathione hydrolase - Mus musculus (Mouse)	Q9R0P3
DBDB_19_02.raw	4751	R.MYSYVTEELPQLINANFPVDPQR.M	2	1	731	3.931	0.471	2724.33	0.66717	0.99	275	(Q9R0P3) ESTD_MOUSE S-formylglutathione hydrolase - Mus musculus (Mouse)	Q9R0P3
DBDB_19_03.raw	4779	R.MYSYVTEELPQLINANFPVDPQR.M	2	1	847.7	3.567	0.4754	2724.33	0.73513	0.98	162	(Q9R0P3) ESTD_MOUSE S-formylglutathione hydrolase - Mus musculus (Mouse)	Q9R0P3
DBDB_19_01.raw	4757	R.MYSYVTEELPQLINANFPVDPQR[.M	2	1	390.3	2.597	0.2603	2728.33	0.53808	0.84	27	(Q9R0P3) ESTD_MOUSE S-formylglutathione hydrolase - Mus musculus (Mouse)	Q9R0P3
DBDB_19_02.raw	4772	R.MYSYVTEELPQLINANFPVDPQR[.M	2	1	663.1	4.968	0.4485	2728.33	0.79249	0.78	72	(Q9R0P3) ESTD_MOUSE S-formylglutathione hydrolase - Mus musculus (Mouse)	Q9R0P3
DBDB_19_03.raw	4776	R.MYSYVTEELPQLINANFPVDPQR[.M	2	1	705.2	4.83	0.4313	2728.33	0.74446	0.83	36	(Q9R0P3) ESTD_MOUSE S-formylglutathione hydrolase - Mus musculus (Mouse)	Q9R0P3
DBDB_22_02.raw	3701	R.SVSAFAPICNPVLCSWGK.K	2	1	665.8	4.253	0.5636	1992.98	0.86293	0.98	152	(Q9R0P3) ESTD_MOUSE S-formylglutathione hydrolase - Mus musculus (Mouse)	Q9R0P3
DBDB_22_03.raw	3583	R.SVSAFAPICNPVLCSWGK.K	2	1	693.7	4.345	0.6066	1992.98	0.78259	0.84	34	(Q9R0P3) ESTD_MOUSE S-formylglutathione hydrolase - Mus musculus (Mouse)	Q9R0P3
DBDB_22_01.raw	3609	R.SVSAFAPICNPVLCSWGK[.K	2	1	762.7	4.619	0.5197	1996.98	1.02479	0.59	24	(Q9R0P3) ESTD_MOUSE S-formylglutathione hydrolase - Mus musculus (Mouse)	Q9R0P3
DBDB_22_03.raw	3576	R.SVSAFAPICNPVLCSWGK[.K	2	1	628.5	4.407	0.5421	1996.98	-	0.98	240	(Q9R0P3) ESTD_MOUSE S-formylglutathione hydrolase - Mus musculus (Mouse)	Q9R0P3
DBDB_45_02.raw	1231	R.HSLGSSEYPVR.R	2	1	406.4	2.87	0.4086	1231.61	1.00464	0.92	119	(Q9R0N0) GALK1_MOUSE Galactokinase - Mus musculus (Mouse)	Q9R0N0	1.00464	NA
DBDB_28_01.raw	2220	K.GCDLISTPDQDHTDFTK.C	2	1	769.5	2.829	0.3521	1949.86	-	0.93	17	(Q9R0M5) TPK1_MOUSE Thiamin pyrophosphokinase 1 - Mus musculus (Mouse)	Q9R0M5	1.96693	0.209858
DBDB_29_01.raw	2315	K.GCDLISTPDQDHTDFTK[.C	3	1	561.5	3.793	0.3871	1953.86	2.22376	0.96	90	(Q9R0M5) TPK1_MOUSE Thiamin pyrophosphokinase 1 - Mus musculus (Mouse)	Q9R0M5
DBDB_29_02.raw	2309	K.GCDLISTPDQDHTDFTK[.C	3	1	461.4	3.547	0.4217	1953.86	2.02534	0.92	43	(Q9R0M5) TPK1_MOUSE Thiamin pyrophosphokinase 1 - Mus musculus (Mouse)	Q9R0M5
DBDB_23_01.raw	3003	K.YCLVVLNQPLDAR.F	2	1	1504.4	3.265	0.4372	1560.83	-	0.92	118	(Q9R0M5) TPK1_MOUSE Thiamin pyrophosphokinase 1 - Mus musculus (Mouse)	Q9R0M5
DBDB_23_03.raw	2967	K.YCLVVLNQPLDAR.F	2	1	2055.9	3.778	0.4588	1560.83	-	0.98	181	(Q9R0M5) TPK1_MOUSE Thiamin pyrophosphokinase 1 - Mus musculus (Mouse)	Q9R0M5
DBDB_33_01.raw	2207	R.ACADGGANHLYDLTEGER.E	3	1	726.5	4.01	0.4254	1948.85	1.86872	0.93	68	(Q9R0M5) TPK1_MOUSE Thiamin pyrophosphokinase 1 - Mus musculus (Mouse)	Q9R0M5
DBDB_33_02.raw	2235	R.ACADGGANHLYDLTEGER.E	3	1	590.8	3.392	0.2793	1948.85	2.05023	0.97	85	(Q9R0M5) TPK1_MOUSE Thiamin pyrophosphokinase 1 - Mus musculus (Mouse)	Q9R0M5
DBDB_33_03.raw	2166	R.ACADGGANHLYDLTEGER.E	3	1	806.8	3.796	0.4747	1948.85	1.66659	0.94	40	(Q9R0M5) TPK1_MOUSE Thiamin pyrophosphokinase 1 - Mus musculus (Mouse)	Q9R0M5
DBDB_37_03.raw	4145	K.ASFKPAEDLCTLHVAPILDNQAVAVK.R	3	1	1222.6	4.325	0.3614	2807.48	-	0.94	88	(Q9R0M4) PODXL_MOUSE Podocalyxin-like protein 1 precursor - Mus musculus (Mous	Q9R0M4	NA	NA
DBDB_21_01.raw	1757	R.QVVAVTGDGTNDGPALK.K	2	1	1035.8	4.136	0.5047	1641.84	1.16918	0.98	288	(Q9R0K7) AT2B2_MOUSE Plasma membrane calcium-transporting ATPase 2 - Mus muscu	Q9R0K7	1.16918	NA
DBDB_21_01.raw	2533	K.DVTLGSVLGR[.Y	2	1	1339.5	3.748	0.315	1020.57	1.62126	0.89	1	(Q9R0H0) ACOX1_MOUSE Acyl-coenzyme A oxidase 1, peroxisomal - Mus musculus (Mo	Q9R0H0	1.58054	0.348715
DBDB_21_03.raw	2560	K.DVTLGSVLGR[.Y	2	1	1364.6	3.435	0.3569	1020.57	1.73236	0.87	68	(Q9R0H0) ACOX1_MOUSE Acyl-coenzyme A oxidase 1, peroxisomal - Mus musculus (Mo	Q9R0H0
DBDB_22_02.raw	2690	K.FGYEEMDNGYLK[.M	2	1	2140.9	3.479	0.301	1469.63	-	0.71	33	(Q9R0H0) ACOX1_MOUSE Acyl-coenzyme A oxidase 1, peroxisomal - Mus musculus (Mo	Q9R0H0
DBDB_22_03.raw	2590	K.FGYEEMDNGYLK[.M	2	1	2345.6	3.587	0.3397	1469.63	-	0.91	45	(Q9R0H0) ACOX1_MOUSE Acyl-coenzyme A oxidase 1, peroxisomal - Mus musculus (Mo	Q9R0H0
DBDB_22_01.raw	2580	K.TQEFILNSPTVTSIK[.W	2	1	1113.4	3.969	0.4299	1681.91	0.89805	0.94	96	(Q9R0H0) ACOX1_MOUSE Acyl-coenzyme A oxidase 1, peroxisomal - Mus musculus (Mo	Q9R0H0
DBDB_22_03.raw	2599	K.TQEFILNSPTVTSIK[.W	2	1	1251.8	4.195	0.4595	1681.91	1.27782	0.92	41	(Q9R0H0) ACOX1_MOUSE Acyl-coenzyme A oxidase 1, peroxisomal - Mus musculus (Mo	Q9R0H0
DBDB_23_01.raw	2588	K.TQEFILNSPTVTSIK[.W	2	1	1004.9	4.272	0.4546	1681.91	1.73402	0.95	5	(Q9R0H0) ACOX1_MOUSE Acyl-coenzyme A oxidase 1, peroxisomal - Mus musculus (Mo	Q9R0H0
DBDB_23_02.raw	2536	K.TQEFILNSPTVTSIK[.W	2	1	1200.7	4.363	0.4482	1681.91	1.73369	0.91	76	(Q9R0H0) ACOX1_MOUSE Acyl-coenzyme A oxidase 1, peroxisomal - Mus musculus (Mo	Q9R0H0
DBDB_23_03.raw	2566	K.TQEFILNSPTVTSIK[.W	2	1	1099.5	4.309	0.4802	1681.91	1.62902	0.94	135	(Q9R0H0) ACOX1_MOUSE Acyl-coenzyme A oxidase 1, peroxisomal - Mus musculus (Mo	Q9R0H0
DBDB_47_01.raw	1615	K.YAQVKPDGTYVKPLSNK.L	3	1	1271.3	4.845	0.4624	1908.02	1.60252	0.98	217	(Q9R0H0) ACOX1_MOUSE Acyl-coenzyme A oxidase 1, peroxisomal - Mus musculus (Mo	Q9R0H0
DBDB_47_02.raw	1662	K.YAQVKPDGTYVKPLSNK.L	3	1	1028.8	3.729	0.422	1908.02	-	0.95	72	(Q9R0H0) ACOX1_MOUSE Acyl-coenzyme A oxidase 1, peroxisomal - Mus musculus (Mo	Q9R0H0
DBDB_47_03.raw	1596	K.YAQVKPDGTYVKPLSNK.L	3	1	1380.1	4.803	0.4975	1908.02	-	0.94	88	(Q9R0H0) ACOX1_MOUSE Acyl-coenzyme A oxidase 1, peroxisomal - Mus musculus (Mo	Q9R0H0
DBDB_21_02.raw	4181	R.EFGIADPEEIM*WFK.K	2	1	618.7	3.504	0.3661	1727.8	1.96912	0.97	90	(Q9R0H0) ACOX1_MOUSE Acyl-coenzyme A oxidase 1, peroxisomal - Mus musculus (Mo	Q9R0H0
DBDB_21_03.raw	4244	R.EFGIADPEEIM*WFK.K	2	2	610	3.544	0.3089	1727.8	1.9055	0.95	78	(Q9R0H0) ACOX1_MOUSE Acyl-coenzyme A oxidase 1, peroxisomal - Mus musculus (Mo	Q9R0H0
DBDB_21_01.raw	4243	R.EFGIADPEEIM*WFK[.K	2	2	695.7	4.111	0.2807	1731.8	1.67467	0.75	12	(Q9R0H0) ACOX1_MOUSE Acyl-coenzyme A oxidase 1, peroxisomal - Mus musculus (Mo	Q9R0H0
DBDB_21_02.raw	4225	R.EFGIADPEEIM*WFK[.K	2	2	649.9	3.89	0.2478	1731.8	1.618	0.84	10	(Q9R0H0) ACOX1_MOUSE Acyl-coenzyme A oxidase 1, peroxisomal - Mus musculus (Mo	Q9R0H0
DBDB_21_02.raw	4572	R.EFGIADPEEIMWFK.K	2	1	1089.1	4.327	0.4177	1711.8	1.61367	0.98	58	(Q9R0H0) ACOX1_MOUSE Acyl-coenzyme A oxidase 1, peroxisomal - Mus musculus (Mo	Q9R0H0
DBDB_21_01.raw	4558	R.EFGIADPEEIMWFK[.K	2	1	1061.7	3.644	0.4079	1715.8	1.62947	0.98	126	(Q9R0H0) ACOX1_MOUSE Acyl-coenzyme A oxidase 1, peroxisomal - Mus musculus (Mo	Q9R0H0
DBDB_21_03.raw	4638	R.EFGIADPEEIMWFK[.K	2	1	1234.9	4.144	0.4225	1715.8	1.52634	0.89	31	(Q9R0H0) ACOX1_MOUSE Acyl-coenzyme A oxidase 1, peroxisomal - Mus musculus (Mo	Q9R0H0
DBDB_25_01.raw	4490	R.EIENLILNDPDFQHEDYNFLTR.S	3	1	479.1	4.207	0.3571	2735.29	1.02176	0.84	25	(Q9R0H0) ACOX1_MOUSE Acyl-coenzyme A oxidase 1, peroxisomal - Mus musculus (Mo	Q9R0H0
DBDB_25_03.raw	4522	R.EIENLILNDPDFQHEDYNFLTR.S	3	1	542.4	3.524	0.2938	2735.29	-	0.87	17	(Q9R0H0) ACOX1_MOUSE Acyl-coenzyme A oxidase 1, peroxisomal - Mus musculus (Mo	Q9R0H0
DBDB_26_01.raw	4458	R.EIENLILNDPDFQHEDYNFLTR.S	3	2	400.6	3.901	0.2762	2735.29	1.6852	0.82	5	(Q9R0H0) ACOX1_MOUSE Acyl-coenzyme A oxidase 1, peroxisomal - Mus musculus (Mo	Q9R0H0
DBDB_26_02.raw	4419	R.EIENLILNDPDFQHEDYNFLTR.S	3	2	413.9	3.668	0.2404	2735.29	1.63296	0.72	53	(Q9R0H0) ACOX1_MOUSE Acyl-coenzyme A oxidase 1, peroxisomal - Mus musculus (Mo	Q9R0H0
DBDB_26_02.raw	4426	R.EIENLILNDPDFQHEDYNFLTR.S	2	1	635.3	4.829	0.5097	2735.29	1.50799	0.83	33	(Q9R0H0) ACOX1_MOUSE Acyl-coenzyme A oxidase 1, peroxisomal - Mus musculus (Mo	Q9R0H0
DBDB_26_02.raw	4409	R.EIENLILNDPDFQHEDYNFLTR[.S	2	1	456.1	5.188	0.4725	2739.29	1.50426	0.91	62	(Q9R0H0) ACOX1_MOUSE Acyl-coenzyme A oxidase 1, peroxisomal - Mus musculus (Mo	Q9R0H0
DBDB_26_03.raw	4435	R.EIENLILNDPDFQHEDYNFLTR[.S	2	1	350.3	5.14	0.438	2739.29	1.61443	0.98	176	(Q9R0H0) ACOX1_MOUSE Acyl-coenzyme A oxidase 1, peroxisomal - Mus musculus (Mo	Q9R0H0
DBDB_26_03.raw	4455	R.EIENLILNDPDFQHEDYNFLTR[.S	4	2	769.6	4.81	0.3097	2739.29	-	0.56	7	(Q9R0H0) ACOX1_MOUSE Acyl-coenzyme A oxidase 1, peroxisomal - Mus musculus (Mo	Q9R0H0
DBDB_46_02.raw	2521	R.EIGTHKPLPGITVGDIGPK.F	2	1	509.9	3.436	0.4591	1929.08	-	0.94	78	(Q9R0H0) ACOX1_MOUSE Acyl-coenzyme A oxidase 1, peroxisomal - Mus musculus (Mo	Q9R0H0
DBDB_45_03.raw	2593	R.EIGTHKPLPGITVGDIGPK[.F	3	2	692.7	4.224	0.4909	1933.08	1.44829	0.94	52	(Q9R0H0) ACOX1_MOUSE Acyl-coenzyme A oxidase 1, peroxisomal - Mus musculus (Mo	Q9R0H0
DBDB_27_03.raw	4220	R.INESIGQGDLSELPELHALTAGLK.A	3	1	671.7	4.573	0.4847	2505.32	1.02249	0.96	112	(Q9R0H0) ACOX1_MOUSE Acyl-coenzyme A oxidase 1, peroxisomal - Mus musculus (Mo	Q9R0H0
DBDB_28_01.raw	4160	R.INESIGQGDLSELPELHALTAGLK[.A	3	1	867.3	6.051	0.548	2509.32	2.38548	0.96	70	(Q9R0H0) ACOX1_MOUSE Acyl-coenzyme A oxidase 1, peroxisomal - Mus musculus (Mo	Q9R0H0
DBDB_28_01.raw	4181	R.INESIGQGDLSELPELHALTAGLK[.A	2	1	853.3	5.326	0.5665	2509.32	2.07729	0.97	91	(Q9R0H0) ACOX1_MOUSE Acyl-coenzyme A oxidase 1, peroxisomal - Mus musculus (Mo	Q9R0H0
DBDB_28_02.raw	4101	R.INESIGQGDLSELPELHALTAGLK[.A	3	1	787.3	5.999	0.5616	2509.32	1.68661	0.97	102	(Q9R0H0) ACOX1_MOUSE Acyl-coenzyme A oxidase 1, peroxisomal - Mus musculus (Mo	Q9R0H0
DBDB_28_02.raw	4155	R.INESIGQGDLSELPELHALTAGLK[.A	2	1	709.2	5.498	0.5492	2509.32	2.13589	0.89	26	(Q9R0H0) ACOX1_MOUSE Acyl-coenzyme A oxidase 1, peroxisomal - Mus musculus (Mo	Q9R0H0
DBDB_28_03.raw	4151	R.INESIGQGDLSELPELHALTAGLK[.A	3	1	577.6	5.001	0.4397	2509.32	1.91736	0.96	89	(Q9R0H0) ACOX1_MOUSE Acyl-coenzyme A oxidase 1, peroxisomal - Mus musculus (Mo	Q9R0H0
DBDB_28_03.raw	4195	R.INESIGQGDLSELPELHALTAGLK[.A	2	1	834	5.303	0.566	2509.32	2.04343	0.94	156	(Q9R0H0) ACOX1_MOUSE Acyl-coenzyme A oxidase 1, peroxisomal - Mus musculus (Mo	Q9R0H0
DBDB_23_02.raw	4242	R.YDGNVYENLFEWAK.K	2	1	909.6	4.39	0.4907	1747.8	1.02326	0.97	236	(Q9R0H0) ACOX1_MOUSE Acyl-coenzyme A oxidase 1, peroxisomal - Mus musculus (Mo	Q9R0H0
DBDB_23_01.raw	4183	R.YDGNVYENLFEWAK[.K	2	1	588.3	3.467	0.3079	1751.8	1.0366	0.82	3	(Q9R0H0) ACOX1_MOUSE Acyl-coenzyme A oxidase 1, peroxisomal - Mus musculus (Mo	Q9R0H0
DBDB_23_01.raw	4312	R.YDGNVYENLFEWAK[.K	2	1	1013.8	4.634	0.521	1751.8	1.18088	0.77	42	(Q9R0H0) ACOX1_MOUSE Acyl-coenzyme A oxidase 1, peroxisomal - Mus musculus (Mo	Q9R0H0
DBDB_23_03.raw	4117	R.YDGNVYENLFEWAK[.K	2	1	988.9	3.72	0.4484	1751.8	1.34647	0.95	115	(Q9R0H0) ACOX1_MOUSE Acyl-coenzyme A oxidase 1, peroxisomal - Mus musculus (Mo	Q9R0H0
DBDB_23_03.raw	4248	R.YDGNVYENLFEWAK[.K	2	1	894.2	4.585	0.4284	1751.8	1.30212	0.98	135	(Q9R0H0) ACOX1_MOUSE Acyl-coenzyme A oxidase 1, peroxisomal - Mus musculus (Mo	Q9R0H0
DBDB_21_02.raw	1945	R.LCASGAGAAPDPAVEEIR.E	2	1	633.3	4.269	0.4577	1783.87	0.56042	0.8	20	(Q9R060) NUBP1_MOUSE Nucleotide-binding protein 1 - Mus musculus (Mouse)	Q9R060	0.56042	NA
DBDB_18_03.raw	2612	K.DLM*LEGSGQTFTSSVPNK.E	2	1	1017	4.335	0.5122	1926.91	1.05533	0.84	31	(Q9R022) DJC12_MOUSE DnaJ homolog subfamily C member 12 - Mus musculus (Mouse)	Q9R022	1.14312	0.28638
DBDB_18_03.raw	2872	K.DLMLEGSGQTFTSSVPNK[.E	2	1	703	4.416	0.4773	1914.92	-	0.96	86	(Q9R022) DJC12_MOUSE DnaJ homolog subfamily C member 12 - Mus musculus (Mouse)	Q9R022
DBDB_29_02.raw	2998	K.FPEEGISPQNPDSPGLSDLNCGHLR.F	3	1	1260	5.915	0.4476	2736.28	0.72425	0.76	33	(Q9R022) DJC12_MOUSE DnaJ homolog subfamily C member 12 - Mus musculus (Mouse)	Q9R022
DBDB_29_03.raw	2998	K.FPEEGISPQNPDSPGLSDLNCGHLR.F	3	1	828.6	4.604	0.4114	2736.28	-	0.85	30	(Q9R022) DJC12_MOUSE DnaJ homolog subfamily C member 12 - Mus musculus (Mouse)	Q9R022
DBDB_30_01.raw	2972	K.FPEEGISPQNPDSPGLSDLNCGHLR.F	3	1	1203.4	5.618	0.4202	2736.28	1.12987	0.97	91	(Q9R022) DJC12_MOUSE DnaJ homolog subfamily C member 12 - Mus musculus (Mouse)	Q9R022
DBDB_30_02.raw	2923	K.FPEEGISPQNPDSPGLSDLNCGHLR.F	3	1	1391.9	5.899	0.4434	2736.28	1.20633	0.98	91	(Q9R022) DJC12_MOUSE DnaJ homolog subfamily C member 12 - Mus musculus (Mouse)	Q9R022
DBDB_30_03.raw	2979	K.FPEEGISPQNPDSPGLSDLNCGHLR.F	3	1	1385.9	5.844	0.4406	2736.28	1.1281	0.96	61	(Q9R022) DJC12_MOUSE DnaJ homolog subfamily C member 12 - Mus musculus (Mouse)	Q9R022
DBDB_26_01.raw	2292	R.WSGDAPSELLR.K	2	2	585.2	2.768	0.1695	1230.61	1.61483	0.98	279	(Q9R022) DJC12_MOUSE DnaJ homolog subfamily C member 12 - Mus musculus (Mouse)	Q9R022
DBDB_22_03.raw	1794	R.ATIECEQPQPDLYR[.F	2	2	512.6	2.912	0.2756	1723.81	1.74101	0.94	57	(Q9QZW0) AT11C_MOUSE Probable phospholipid-transporting ATPase 11C - Mus muscu	Q9QZW0	1.74101	NA
DBDB_18_01.raw	2574	K.AASADSTTEGTPTDGFTVLSTK.S	2	1	1324.7	6.308	0.5736	2157.02	0.80341	0.82	73	(Q9QZQ8) H2AY_MOUSE Core histone macro-H2A.1 - Mus musculus (Mouse)	Q9QZQ8	0.779005	0.125483
DBDB_18_02.raw	2547	K.AASADSTTEGTPTDGFTVLSTK.S	2	1	1018.3	5.511	0.6334	2157.02	-	0.95	34	(Q9QZQ8) H2AY_MOUSE Core histone macro-H2A.1 - Mus musculus (Mouse)	Q9QZQ8
DBDB_18_03.raw	2451	K.AASADSTTEGTPTDGFTVLSTK.S	2	1	1215.7	5.963	0.62	2157.02	-	0.68	80	(Q9QZQ8) H2AY_MOUSE Core histone macro-H2A.1 - Mus musculus (Mouse)	Q9QZQ8
DBDB_19_01.raw	2667	K.AASADSTTEGTPTDGFTVLSTK.S	2	1	922.9	5.964	0.6173	2157.02	0.92082	0.67	1	(Q9QZQ8) H2AY_MOUSE Core histone macro-H2A.1 - Mus musculus (Mouse)	Q9QZQ8
DBDB_19_03.raw	2677	K.AASADSTTEGTPTDGFTVLSTK.S	2	1	868.3	4.666	0.6157	2157.02	0.88188	0.98	47	(Q9QZQ8) H2AY_MOUSE Core histone macro-H2A.1 - Mus musculus (Mouse)	Q9QZQ8
DBDB_19_03.raw	2635	K.AASADSTTEGTPTDGFTVLSTK[.S	2	1	781.8	5.846	0.6056	2161.02	0.9403	0.83	8	(Q9QZQ8) H2AY_MOUSE Core histone macro-H2A.1 - Mus musculus (Mouse)	Q9QZQ8
DBDB_37_03.raw	1787	K.GKLEAIITPPPAK.K	2	1	632.7	2.929	0.21	1334.8	-	0.88	43	(Q9QZQ8) H2AY_MOUSE Core histone macro-H2A.1 - Mus musculus (Mouse)	Q9QZQ8
DBDB_30_01.raw	3487	K.GVTIASGGVLPNIHPELLAK.K	2	1	1195.6	5.573	0.58	1986.14	0.60469	0.97	109	(Q9QZQ8) H2AY_MOUSE Core histone macro-H2A.1 - Mus musculus (Mouse)	Q9QZQ8
DBDB_30_02.raw	3376	K.GVTIASGGVLPNIHPELLAK.K	3	1	1069.5	3.64	0.3776	1986.14	0.67255	0.86	54	(Q9QZQ8) H2AY_MOUSE Core histone macro-H2A.1 - Mus musculus (Mouse)	Q9QZQ8
DBDB_30_02.raw	3400	K.GVTIASGGVLPNIHPELLAK.K	2	1	1292.5	5.612	0.6016	1986.14	0.70567	0.97	80	(Q9QZQ8) H2AY_MOUSE Core histone macro-H2A.1 - Mus musculus (Mouse)	Q9QZQ8
DBDB_30_03.raw	3592	K.GVTIASGGVLPNIHPELLAK.K	3	1	946.2	3.968	0.3848	1986.14	0.70272	0.91	39	(Q9QZQ8) H2AY_MOUSE Core histone macro-H2A.1 - Mus musculus (Mouse)	Q9QZQ8
DBDB_28_02.raw	3080	K.NGPLEVAGAAISAGHGLPAK.F	3	2	549.7	3.314	0.3668	1829.99	-	0.96	100	(Q9QZQ8) H2AY_MOUSE Core histone macro-H2A.1 - Mus musculus (Mouse)	Q9QZQ8
DBDB_28_02.raw	3106	K.NGPLEVAGAAISAGHGLPAK[.F	2	1	772.7	2.675	0.2357	1833.99	-	0.97	106	(Q9QZQ8) H2AY_MOUSE Core histone macro-H2A.1 - Mus musculus (Mouse)	Q9QZQ8
DBDB_20_03.raw	4212	K.EIILDDDECPLQIFR.E	2	1	568.4	2.645	0.1452	1875.92	-	0.94	84	(Q9QZQ1) AFAD_MOUSE Afadin - Mus musculus (Mouse)	Q9QZQ1	0.914532	0.15063
DBDB_18_01.raw	2538	R.DYEPPSLSSAPCAPPPPPQR.N	2	1	806.6	4.806	0.5617	2163.03	0.8842	0.92	68	(Q9QZQ1) AFAD_MOUSE Afadin - Mus musculus (Mouse)	Q9QZQ1
DBDB_18_02.raw	2590	R.DYEPPSLSSAPCAPPPPPQR[.N	2	1	601.1	3.999	0.4459	2167.03	0.79126	0.81	53	(Q9QZQ1) AFAD_MOUSE Afadin - Mus musculus (Mouse)	Q9QZQ1
DBDB_18_03.raw	2521	R.DYEPPSLSSAPCAPPPPPQR[.N	2	1	517.9	3.534	0.2721	2167.03	0.84964	0.98	138	(Q9QZQ1) AFAD_MOUSE Afadin - Mus musculus (Mouse)	Q9QZQ1
DBDB_21_03.raw	4584	R.FVLKNENDAIPAK[.K	2	2	564	3.16	0.2366	1462.8	-	0.81	9	(Q9QZQ1) AFAD_MOUSE Afadin - Mus musculus (Mouse)	Q9QZQ1
DBDB_21_01.raw	2730	R.VSSTATTQDVIETLAEK.F	2	1	628.3	3.218	0.3555	1792.92	1.13303	0.91	32	(Q9QZQ1) AFAD_MOUSE Afadin - Mus musculus (Mouse)	Q9QZQ1
DBDB_27_02.raw	1756	R.NPCAEENLSSWR.I	2	1	790	3.502	0.4305	1462.65	-	0.85	22	(Q9QZN4) FBX6_MOUSE F-box only protein 6 - Mus musculus (Mouse)	Q9QZN4	NA	NA
DBDB_19_01.raw	1474	R.DPSQIDSNEPYM*K.I	2	1	1336.5	3.997	0.4419	1539.66	0.91087	0.98	157	(Q9QZD9) EIF3I_MOUSE Eukaryotic translation initiation factor 3 subunit I - Mu	Q9QZD9	1.00829	0.124708
DBDB_19_03.raw	1479	R.DPSQIDSNEPYM*K.I	2	1	1202.7	3.956	0.4304	1539.66	0.90745	0.95	109	(Q9QZD9) EIF3I_MOUSE Eukaryotic translation initiation factor 3 subunit I - Mu	Q9QZD9
DBDB_19_01.raw	1481	R.DPSQIDSNEPYM*K[.I	2	1	1558.9	5.172	0.2573	1543.66	0.93528	0.98	112	(Q9QZD9) EIF3I_MOUSE Eukaryotic translation initiation factor 3 subunit I - Mu	Q9QZD9
DBDB_19_02.raw	1427	R.DPSQIDSNEPYM*K[.I	2	1	1655.5	4.779	0.2995	1543.66	1.12945	0.95	88	(Q9QZD9) EIF3I_MOUSE Eukaryotic translation initiation factor 3 subunit I - Mu	Q9QZD9
DBDB_19_01.raw	1902	R.DPSQIDSNEPYMK.I	2	1	1710.6	4.367	0.2727	1523.67	1.15842	0.77	53	(Q9QZD9) EIF3I_MOUSE Eukaryotic translation initiation factor 3 subunit I - Mu	Q9QZD9
DBDB_20_01.raw	4167	K.VLLGGISGLTGGFVGTPADLVNVR.M	3	1	1586.6	3.971	0.3087	2312.3	0.75085	0.69	31	(Q9QZD8) DIC_MOUSE Mitochondrial dicarboxylate carrier - Mus musculus (Mouse)	Q9QZD8	0.918742	0.21028
DBDB_20_01.raw	4181	K.VLLGGISGLTGGFVGTPADLVNVR.M	2	1	2241.9	6.066	0.635	2312.3	0.8125	0.61	16	(Q9QZD8) DIC_MOUSE Mitochondrial dicarboxylate carrier - Mus musculus (Mouse)	Q9QZD8
DBDB_20_02.raw	4535	K.VLLGGISGLTGGFVGTPADLVNVR.M	2	1	2240.8	5.795	0.5915	2312.3	0.76059	0.94	84	(Q9QZD8) DIC_MOUSE Mitochondrial dicarboxylate carrier - Mus musculus (Mouse)	Q9QZD8
DBDB_43_01.raw	1958	R.NYSHALDGLYR[.V	2	1	427.1	2.692	0.2432	1312.63	1.03755	0.91	45	(Q9QZD8) DIC_MOUSE Mitochondrial dicarboxylate carrier - Mus musculus (Mouse)	Q9QZD8
DBDB_44_01.raw	2068	R.NYSHALDGLYR[.V	2	1	313.6	2.656	0.2574	1312.63	1.23222	0.83	31	(Q9QZD8) DIC_MOUSE Mitochondrial dicarboxylate carrier - Mus musculus (Mouse)	Q9QZD8
DBDB_21_02.raw	4383	R.ALPPLWENLDLVPAGDR.Q	2	2	316.6	2.849	0.1317	1876	0.65101	0.96	51	(Q9QZA0) CAH5B_MOUSE Carbonic anhydrase 5B, mitochondrial precursor - Mus musc	Q9QZA0	0.65101	NA
DBDB_22_03.raw	3267	K.SDENNDLPSSFTGYFK.K	2	1	428.4	3.019	0.2929	1820.8	-	0.93	35	(Q9QZ85) IIGP1_MOUSE Interferon-inducible GTPase 1 - Mus musculus (Mouse)	Q9QZ85	0.19237	NA
DBDB_29_01.raw	1804	K.VDSDITNEADGKPQTFDK.E	3	1	547.4	3.09	0.4003	1979.92	0.19237	0.97	70	(Q9QZ85) IIGP1_MOUSE Interferon-inducible GTPase 1 - Mus musculus (Mouse)	Q9QZ85
DBDB_23_02.raw	3635	K.SVFFGPDFITVTK[.E	2	1	701.4	2.695	0.1276	1461.77	1.06324	0.9	65	(Q9QZ23) NFU1_MOUSE NFU1 iron-sulfur cluster scaffold homolog - Mus musculus (	Q9QZ23	0.942467	0.107066
DBDB_39_01.raw	1808	R.IRPTVQEDGGDVIYR[.G	3	1	2716.4	4.358	0.2839	1721.89	0.8592	0.93	51	(Q9QZ23) NFU1_MOUSE NFU1 iron-sulfur cluster scaffold homolog - Mus musculus (	Q9QZ23
DBDB_39_03.raw	1836	R.IRPTVQEDGGDVIYR[.G	3	1	2223.8	5.3	0.3988	1721.89	0.90496	0.98	124	(Q9QZ23) NFU1_MOUSE NFU1 iron-sulfur cluster scaffold homolog - Mus musculus (	Q9QZ23
DBDB_18_01.raw	1683	K.DMYNDTLNGSTEK[.R	2	1	1435.1	3.23	0.1506	1491.63	-	0.93	133	(Q9QYS9) QKI_MOUSE Protein quaking - Mus musculus (Mouse)	Q9QYS9	NA	NA
DBDB_14_02.raw	5378	K.DGLLDVVEALQSPLVDK.K	2	1	926.6	3.95	0.2954	1810.98	-	0.96	69	(Q9QYR9) ACOT2_MOUSE Acyl-coenzyme A thioesterase 2, mitochondrial precursor -	Q9QYR9	0.628384	0.138786
DBDB_14_03.raw	5434	K.DGLLDVVEALQSPLVDK.K	2	1	601.2	3.608	0.4401	1810.98	-	0.98	161	(Q9QYR9) ACOT2_MOUSE Acyl-coenzyme A thioesterase 2, mitochondrial precursor -	Q9QYR9
DBDB_17_01.raw	5309	K.DGLLDVVEALQSPLVDK.K	3	1	2718	5.615	0.2562	1810.98	0.53603	0.9	54	(Q9QYR9) ACOT2_MOUSE Acyl-coenzyme A thioesterase 2, mitochondrial precursor -	Q9QYR9
DBDB_17_01.raw	5321	K.DGLLDVVEALQSPLVDK.K	2	1	2032.7	3.839	0.3782	1810.98	0.72247	0.97	96	(Q9QYR9) ACOT2_MOUSE Acyl-coenzyme A thioesterase 2, mitochondrial precursor -	Q9QYR9
DBDB_17_01.raw	5453	K.DGLLDVVEALQSPLVDK.K	2	1	1832.9	4.013	0.3761	1810.98	0.71472	0.93	29	(Q9QYR9) ACOT2_MOUSE Acyl-coenzyme A thioesterase 2, mitochondrial precursor -	Q9QYR9
DBDB_17_01.raw	5465	K.DGLLDVVEALQSPLVDK.K	3	1	2089	5.087	0.3147	1810.98	0.51998	0.88	66	(Q9QYR9) ACOT2_MOUSE Acyl-coenzyme A thioesterase 2, mitochondrial precursor -	Q9QYR9
DBDB_17_02.raw	5322	K.DGLLDVVEALQSPLVDK.K	3	1	2049	5.591	0.2949	1810.98	0.63788	0.45	6	(Q9QYR9) ACOT2_MOUSE Acyl-coenzyme A thioesterase 2, mitochondrial precursor -	Q9QYR9
DBDB_17_02.raw	5343	K.DGLLDVVEALQSPLVDK.K	2	1	1581.9	4.806	0.1924	1810.98	-	0.94	40	(Q9QYR9) ACOT2_MOUSE Acyl-coenzyme A thioesterase 2, mitochondrial precursor -	Q9QYR9
DBDB_17_03.raw	5357	K.DGLLDVVEALQSPLVDK.K	3	1	2695.9	5.42	0.2434	1810.98	0.53233	0.95	68	(Q9QYR9) ACOT2_MOUSE Acyl-coenzyme A thioesterase 2, mitochondrial precursor -	Q9QYR9
DBDB_17_03.raw	5440	K.DGLLDVVEALQSPLVDK.K	2	1	2240.9	5.165	0.247	1810.98	0.54032	0.97	140	(Q9QYR9) ACOT2_MOUSE Acyl-coenzyme A thioesterase 2, mitochondrial precursor -	Q9QYR9
DBDB_17_03.raw	5486	K.DGLLDVVEALQSPLVDK.K	3	1	2556.1	5.371	0.2928	1810.98	0.54982	0.95	93	(Q9QYR9) ACOT2_MOUSE Acyl-coenzyme A thioesterase 2, mitochondrial precursor -	Q9QYR9
DBDB_17_01.raw	5395	K.DGLLDVVEALQSPLVDK[.K	2	1	1315.7	4.642	0.1776	1814.98	0.56854	0.76	25	(Q9QYR9) ACOT2_MOUSE Acyl-coenzyme A thioesterase 2, mitochondrial precursor -	Q9QYR9
DBDB_25_03.raw	5139	K.DGLLDVVEALQSPLVDKK.S	3	1	718.1	3.391	0.29	1939.07	-	0.93	42	(Q9QYR9) ACOT2_MOUSE Acyl-coenzyme A thioesterase 2, mitochondrial precursor -	Q9QYR9
DBDB_26_01.raw	5098	K.DGLLDVVEALQSPLVDKK.S	3	1	457.9	3.454	0.3643	1939.07	0.85744	0.98	146	(Q9QYR9) ACOT2_MOUSE Acyl-coenzyme A thioesterase 2, mitochondrial precursor -	Q9QYR9
DBDB_26_02.raw	5090	K.DGLLDVVEALQSPLVDKK[.S	2	1	990.7	2.664	0.1149	1943.07	0.89333	0.9	32	(Q9QYR9) ACOT2_MOUSE Acyl-coenzyme A thioesterase 2, mitochondrial precursor -	Q9QYR9
DBDB_24_01.raw	1334	R.ADAGGELNLAR.A	2	1	1575.3	3.466	0.2623	1086.55	-	0.82	15	(Q9QYR9) ACOT2_MOUSE Acyl-coenzyme A thioesterase 2, mitochondrial precursor -	Q9QYR9
DBDB_24_02.raw	1339	R.ADAGGELNLAR.A	2	1	1951.1	4.241	0.3184	1086.55	0.46775	0.92	53	(Q9QYR9) ACOT2_MOUSE Acyl-coenzyme A thioesterase 2, mitochondrial precursor -	Q9QYR9
DBDB_24_03.raw	1342	R.ADAGGELNLAR.A	2	1	1011.5	3.44	0.3151	1086.55	-	0.98	126	(Q9QYR9) ACOT2_MOUSE Acyl-coenzyme A thioesterase 2, mitochondrial precursor -	Q9QYR9
DBDB_18_01.raw	4159	K.DIVDLLNNPLEGPDQK.S	2	1	811.7	3.108	0.4827	1779.91	0.52193	0.93	63	(Q9QYR7) ACOT3_MOUSE Acyl-coenzyme A thioesterase 3 - Mus musculus (Mouse)	Q9QYR7	0.547295	0.0358715
DBDB_18_02.raw	4187	K.DIVDLLNNPLEGPDQK.S	2	1	1093.3	3.428	0.5082	1779.91	0.57266	0.93	68	(Q9QYR7) ACOT3_MOUSE Acyl-coenzyme A thioesterase 3 - Mus musculus (Mouse)	Q9QYR7
DBDB_37_01.raw	4535	K.EYHPDKNPNAGDK.F	2	2	514.9	2.302	0.2001	1484.68	-	0.91	3	(Q9QYJ0) DNJA2_MOUSE DnaJ homolog subfamily A member 2 - Mus musculus (Mouse)	Q9QYJ0	1.20006	0.011844
DBDB_37_02.raw	4592	K.EYHPDKNPNAGDK.F	2	2	556.2	3.451	0.2213	1484.68	-	0.91	26	(Q9QYJ0) DNJA2_MOUSE DnaJ homolog subfamily A member 2 - Mus musculus (Mouse)	Q9QYJ0
DBDB_37_02.raw	5313	K.EYHPDKNPNAGDK.F	2	2	600.8	3.079	0.2613	1484.68	-	0.93	38	(Q9QYJ0) DNJA2_MOUSE DnaJ homolog subfamily A member 2 - Mus musculus (Mouse)	Q9QYJ0
DBDB_38_02.raw	5200	K.EYHPDKNPNAGDK.F	2	1	481.5	2.686	0.2304	1484.68	-	0.94	38	(Q9QYJ0) DNJA2_MOUSE DnaJ homolog subfamily A member 2 - Mus musculus (Mouse)	Q9QYJ0
DBDB_22_01.raw	3766	K.FDVQFPENNWINPDK.L	2	1	701.2	3.636	0.1866	1862.87	1.19169	0.74	2	(Q9QYJ0) DNJA2_MOUSE DnaJ homolog subfamily A member 2 - Mus musculus (Mouse)	Q9QYJ0
DBDB_22_02.raw	3839	K.FDVQFPENNWINPDK.L	2	1	700.6	3.528	0.2375	1862.87	1.20844	0.93	170	(Q9QYJ0) DNJA2_MOUSE DnaJ homolog subfamily A member 2 - Mus musculus (Mouse)	Q9QYJ0
DBDB_23_02.raw	5255	K.LSELEDLLPSRPEVPNVIGETEEVELQEFDSTR[.G	3	1	616.1	5.105	0.53	3773.87	-	0.9	34	(Q9QYJ0) DNJA2_MOUSE DnaJ homolog subfamily A member 2 - Mus musculus (Mouse)	Q9QYJ0
DBDB_18_02.raw	4944	R.ITFTGEADQAPGVEPGDIVLLLQEK[.E	3	1	964	3.66	0.2944	2644.38	-	0.96	37	(Q9QYJ0) DNJA2_MOUSE DnaJ homolog subfamily A member 2 - Mus musculus (Mouse)	Q9QYJ0
DBDB_19_01.raw	1930	R.SVTSNQSDGTQESCESPDVLDR.H	2	1	2069.1	5.26	0.5479	2411.03	0.79405	0.96	74	(Q9QYF9) NDRG3_MOUSE Protein NDRG3 - Mus musculus (Mouse)	Q9QYF9	0.79405	NA
DBDB_23_03.raw	1386	K.SAQTSGLKQGSRMEK.I	2	2	574	2.859	0.1806	1607.82	0.87451	0.73	18	(Q9QYC7) VKGC_MOUSE Vitamin K-dependent gamma-carboxylase - Mus musculus (Mous	Q9QYC7	0.87451	NA
DBDB_31_01.raw	3263	K.EYQPHVIVSTTGPNPFNTLTDR.E	3	1	846.4	3.374	0.3961	2486.23	-	0.94	29	(Q9QYC0) ADDA_MOUSE Alpha-adducin - Mus musculus (Mouse)	Q9QYC0	1.01579	0.157159
DBDB_21_01.raw	1690	K.SPPDQSAVPNTPPSTPVK[.L	2	1	603.3	4.67	0.5174	1822.92	1.12026	0.94	105	(Q9QYC0) ADDA_MOUSE Alpha-adducin - Mus musculus (Mouse)	Q9QYC0
DBDB_21_02.raw	1642	K.SPPDQSAVPNTPPSTPVK[.L	2	1	673.2	4.792	0.5557	1822.92	1.15703	0.93	26	(Q9QYC0) ADDA_MOUSE Alpha-adducin - Mus musculus (Mouse)	Q9QYC0
DBDB_21_03.raw	1710	K.SPPDQSAVPNTPPSTPVK[.L	2	1	524.5	4.325	0.4802	1822.92	1.29363	0.96	53	(Q9QYC0) ADDA_MOUSE Alpha-adducin - Mus musculus (Mouse)	Q9QYC0
DBDB_25_01.raw	3340	K.WQIGEQEFEALM*R[.M	2	1	1324.9	4.051	0.4483	1656.77	0.83812	0.75	22	(Q9QYC0) ADDA_MOUSE Alpha-adducin - Mus musculus (Mouse)	Q9QYC0
DBDB_25_02.raw	3377	K.WQIGEQEFEALM*R[.M	2	1	1280.8	3.848	0.389	1656.77	0.85215	0.92	58	(Q9QYC0) ADDA_MOUSE Alpha-adducin - Mus musculus (Mouse)	Q9QYC0
DBDB_27_01.raw	2849	K.YSDVEVPASVTGHSFASDGDSGTCSPLR.H	3	1	740.6	5.045	0.6009	2898.29	-	0.93	74	(Q9QYC0) ADDA_MOUSE Alpha-adducin - Mus musculus (Mouse)	Q9QYC0
DBDB_27_02.raw	2910	K.YSDVEVPASVTGHSFASDGDSGTCSPLR[.H	3	1	641.2	5.382	0.5899	2902.29	-	0.85	15	(Q9QYC0) ADDA_MOUSE Alpha-adducin - Mus musculus (Mouse)	Q9QYC0
DBDB_27_03.raw	2869	K.YSDVEVPASVTGHSFASDGDSGTCSPLR[.H	3	1	827.2	6.132	0.5909	2902.29	-	0.77	38	(Q9QYC0) ADDA_MOUSE Alpha-adducin - Mus musculus (Mouse)	Q9QYC0
DBDB_32_01.raw	1224	R.AAVVTSPPPTTAPHK.E	2	1	628.3	2.914	0.4105	1473.81	0.98317	0.9	84	(Q9QYC0) ADDA_MOUSE Alpha-adducin - Mus musculus (Mouse)	Q9QYC0
DBDB_32_01.raw	1222	R.AAVVTSPPPTTAPHK[.E	2	1	547.2	3.451	0.494	1477.81	1.08477	0.94	1	(Q9QYC0) ADDA_MOUSE Alpha-adducin - Mus musculus (Mouse)	Q9QYC0
DBDB_28_02.raw	1666	R.MLDNLGYR[.T	2	1	742.1	2.39	0.4577	985.482	SHARED	0.89	86	(Q9QYC0) ADDA_MOUSE Alpha-adducin - Mus musculus (Mouse)	Q9QYC0
DBDB_20_02.raw	2857	R.TLASAGGPDNLVLLDPGK.Y	2	1	388	4.067	0.3162	1737.94	0.87929	0.95	24	(Q9QYC0) ADDA_MOUSE Alpha-adducin - Mus musculus (Mouse)	Q9QYC0
DBDB_20_03.raw	2950	R.TLASAGGPDNLVLLDPGK.Y	2	1	1275.2	4.147	0.4423	1737.94	0.93372	0.98	66	(Q9QYC0) ADDA_MOUSE Alpha-adducin - Mus musculus (Mouse)	Q9QYC0
DBDB_19_02.raw	3699	K.IEDPNQFVPLNTNPTEVLEK[.R	3	1	532.3	4.321	0.3188	2301.17	-	0.77	42	(Q9QYB5) ADDG_MOUSE Gamma-adducin - Mus musculus (Mouse)	Q9QYB5	NA	NA
DBDB_19_03.raw	3710	K.IEDPNQFVPLNTNPTEVLEK[.R	2	1	311.6	3.587	0.2602	2301.17	-	0.95	118	(Q9QYB5) ADDG_MOUSE Gamma-adducin - Mus musculus (Mouse)	Q9QYB5
DBDB_22_01.raw	3413	R.EDLECLIQEQMK.K	2	1	1112	3.192	0.3187	1535.72	-	0.98	210	(Q9QYB5) ADDG_MOUSE Gamma-adducin - Mus musculus (Mouse)	Q9QYB5
DBDB_31_01.raw	3738	K.EEDKEPLIELFVK.A	2	2	691.2	2.711	0.1885	1588.85	1.22276	0.66	33	(Q9QYB1) CLIC4_MOUSE Chloride intracellular channel protein 4 - Mus musculus (	Q9QYB1	1.04039	0.190014
DBDB_31_01.raw	3728	K.EEDKEPLIELFVK[.A	2	1	524.9	3.175	0.2544	1592.85	0.87042	0.85	15	(Q9QYB1) CLIC4_MOUSE Chloride intracellular channel protein 4 - Mus musculus (	Q9QYB1
DBDB_22_02.raw	1829	K.EVEIAYSDVAK[.R	2	1	969.2	3.537	0.4097	1227.62	0.89831	0.84	78	(Q9QYB1) CLIC4_MOUSE Chloride intracellular channel protein 4 - Mus musculus (	Q9QYB1
DBDB_40_01.raw	1337	K.HPESNTAGM*DIFAK.F	2	1	934.1	3.309	0.4635	1533.7	1.09321	0.79	79	(Q9QYB1) CLIC4_MOUSE Chloride intracellular channel protein 4 - Mus musculus (	Q9QYB1
DBDB_40_02.raw	1386	K.HPESNTAGM*DIFAK.F	2	1	471.1	3.065	0.399	1533.7	1.15138	0.92	53	(Q9QYB1) CLIC4_MOUSE Chloride intracellular channel protein 4 - Mus musculus (	Q9QYB1
DBDB_40_03.raw	1340	K.HPESNTAGM*DIFAK.F	2	1	659.5	3.405	0.4129	1533.7	1.21843	0.82	55	(Q9QYB1) CLIC4_MOUSE Chloride intracellular channel protein 4 - Mus musculus (	Q9QYB1
DBDB_40_01.raw	1370	K.HPESNTAGM*DIFAK[.F	2	1	392.4	3.295	0.346	1537.7	1.45385	0.64	88	(Q9QYB1) CLIC4_MOUSE Chloride intracellular channel protein 4 - Mus musculus (	Q9QYB1
DBDB_21_01.raw	3980	K.IEEFLEEVLCPPK.Y	2	1	658.3	2.991	0.2275	1602.82	0.78392	0.83	22	(Q9QYB1) CLIC4_MOUSE Chloride intracellular channel protein 4 - Mus musculus (	Q9QYB1
DBDB_21_02.raw	3984	K.IEEFLEEVLCPPK.Y	2	1	1178.7	3.414	0.345	1602.82	0.86504	0.96	89	(Q9QYB1) CLIC4_MOUSE Chloride intracellular channel protein 4 - Mus musculus (	Q9QYB1
DBDB_22_01.raw	4053	K.IEEFLEEVLCPPK.Y	2	2	461	2.505	0.1644	1602.82	0.99019	0.97	154	(Q9QYB1) CLIC4_MOUSE Chloride intracellular channel protein 4 - Mus musculus (	Q9QYB1
DBDB_21_03.raw	4086	K.IEEFLEEVLCPPK[.Y	2	1	903.8	4.167	0.3901	1606.82	0.90229	0.94	29	(Q9QYB1) CLIC4_MOUSE Chloride intracellular channel protein 4 - Mus musculus (	Q9QYB1
DBDB_17_02.raw	3423	K.LDEYLNSPLPDEIDENSM*EDIK.F	3	1	949.5	3.458	0.3333	2595.17	1.27527	0.73	40	(Q9QYB1) CLIC4_MOUSE Chloride intracellular channel protein 4 - Mus musculus (	Q9QYB1
DBDB_17_02.raw	3439	K.LDEYLNSPLPDEIDENSM*EDIK.F	2	1	1150.4	5.794	0.5031	2595.17	1.22004	0.59	18	(Q9QYB1) CLIC4_MOUSE Chloride intracellular channel protein 4 - Mus musculus (	Q9QYB1
DBDB_17_01.raw	3447	K.LDEYLNSPLPDEIDENSM*EDIK[.F	3	1	1029.5	3.525	0.3464	2599.17	1.3023	0.96	93	(Q9QYB1) CLIC4_MOUSE Chloride intracellular channel protein 4 - Mus musculus (	Q9QYB1
DBDB_17_03.raw	3465	K.LDEYLNSPLPDEIDENSM*EDIK[.F	3	1	1072.9	4.148	0.2158	2599.17	1.44051	0.97	124	(Q9QYB1) CLIC4_MOUSE Chloride intracellular channel protein 4 - Mus musculus (	Q9QYB1
DBDB_17_01.raw	3801	K.LDEYLNSPLPDEIDENSMEDIK[.F	2	1	709.3	3.941	0.2556	2583.17	0.98071	0.89	23	(Q9QYB1) CLIC4_MOUSE Chloride intracellular channel protein 4 - Mus musculus (	Q9QYB1
DBDB_20_01.raw	1059	R.DEFTNTCPSDK.E	2	1	511.2	2.52	0.3542	1313.54	-	0.79	65	(Q9QYB1) CLIC4_MOUSE Chloride intracellular channel protein 4 - Mus musculus (	Q9QYB1
DBDB_20_03.raw	1129	R.DEFTNTCPSDK.E	2	1	993	3.105	0.3886	1313.54	0.97086	0.82	38	(Q9QYB1) CLIC4_MOUSE Chloride intracellular channel protein 4 - Mus musculus (	Q9QYB1
DBDB_18_02.raw	1150	R.DEFTNTCPSDK[.E	2	1	825.6	2.667	0.165	1317.54	-	0.91	17	(Q9QYB1) CLIC4_MOUSE Chloride intracellular channel protein 4 - Mus musculus (	Q9QYB1
DBDB_20_03.raw	3516	R.FLDGDEM*TLADCNLLPK.L	2	1	1032.4	4.223	0.5684	1967.92	1.12719	0.92	1	(Q9QYB1) CLIC4_MOUSE Chloride intracellular channel protein 4 - Mus musculus (	Q9QYB1
DBDB_20_02.raw	3436	R.FLDGDEM*TLADCNLLPK[.L	2	1	963.6	3.912	0.3782	1971.92	0.81875	0.97	186	(Q9QYB1) CLIC4_MOUSE Chloride intracellular channel protein 4 - Mus musculus (	Q9QYB1
DBDB_20_02.raw	3809	R.FLDGDEMTLADCNLLPK.L	2	1	1693.8	4.259	0.3539	1951.92	0.99974	0.99	160	(Q9QYB1) CLIC4_MOUSE Chloride intracellular channel protein 4 - Mus musculus (	Q9QYB1
DBDB_20_02.raw	3958	R.FLDGDEMTLADCNLLPK.L	2	1	837.3	2.186	0.1991	1951.92	-	0.95	53	(Q9QYB1) CLIC4_MOUSE Chloride intracellular channel protein 4 - Mus musculus (	Q9QYB1
DBDB_20_02.raw	3821	R.FLDGDEMTLADCNLLPK[.L	2	1	1378.4	5.299	0.4951	1955.92	1.07134	0.97	126	(Q9QYB1) CLIC4_MOUSE Chloride intracellular channel protein 4 - Mus musculus (	Q9QYB1
DBDB_20_02.raw	3825	R.FLDGDEMTLADCNLLPK[.L	3	1	764.4	4.09	0.3921	1955.92	0.85653	0.91	37	(Q9QYB1) CLIC4_MOUSE Chloride intracellular channel protein 4 - Mus musculus (	Q9QYB1
DBDB_20_03.raw	3926	R.FLDGDEMTLADCNLLPK[.L	2	1	1112.8	4.926	0.4394	1955.92	0.97705	0.97	94	(Q9QYB1) CLIC4_MOUSE Chloride intracellular channel protein 4 - Mus musculus (	Q9QYB1
DBDB_20_03.raw	3945	R.FLDGDEMTLADCNLLPK[.L	3	1	850.4	3.555	0.1948	1955.92	0.98163	0.93	33	(Q9QYB1) CLIC4_MOUSE Chloride intracellular channel protein 4 - Mus musculus (	Q9QYB1
DBDB_43_02.raw	4005	R.KPADLQNLAPGTHPPFITFNSEVK.T	3	1	898	3.871	0.3288	2621.37	0.84637	0.82	29	(Q9QYB1) CLIC4_MOUSE Chloride intracellular channel protein 4 - Mus musculus (	Q9QYB1
DBDB_43_01.raw	3830	R.KPADLQNLAPGTHPPFITFNSEVK[.T	3	1	1227.4	4.919	0.4066	2625.37	0.81444	0.71	36	(Q9QYB1) CLIC4_MOUSE Chloride intracellular channel protein 4 - Mus musculus (	Q9QYB1
DBDB_43_03.raw	3848	R.KPADLQNLAPGTHPPFITFNSEVK[.T	3	1	1045.5	5.051	0.4415	2625.37	0.95812	0.85	22	(Q9QYB1) CLIC4_MOUSE Chloride intracellular channel protein 4 - Mus musculus (	Q9QYB1
DBDB_27_01.raw	2356	K.FVNWQVDGEYR.G	2	2	390.7	2.414	0.2893	1412.66	-	0.85	7	(Q9QYA2) TOM40_MOUSE Mitochondrial import receptor subunit TOM40 homolog - Mus	Q9QYA2	NA	NA
DBDB_28_03.raw	2471	R.TPGAAASGAAAASEDGSCGCLPNPGTFEECHR.K	3	1	1314	4.759	0.4157	3205.36	-	0.64	16	(Q9QYA2) TOM40_MOUSE Mitochondrial import receptor subunit TOM40 homolog - Mus	Q9QYA2
DBDB_34_01.raw	2713	R.LTGFHETSNINDFSAGVANR.G	3	1	846.3	4.101	0.622	2150.03	SHARED	0.95	60	(Q9QY94) GLNA_ACOCA Glutamine synthetase - Acomys cahirinus (Egyptian spiny mo	Q9QY94	NA	NA
DBDB_34_02.raw	2630	R.LTGFHETSNINDFSAGVANR.G	3	1	926.3	4.493	0.1253	2150.03	SHARED	0.7	26	(Q9QY94) GLNA_ACOCA Glutamine synthetase - Acomys cahirinus (Egyptian spiny mo	Q9QY94
DBDB_34_03.raw	2717	R.LTGFHETSNINDFSAGVANR[.G	3	1	1161.7	4.691	0.2305	2154.03	SHARED	0.78	21	(Q9QY94) GLNA_ACOCA Glutamine synthetase - Acomys cahirinus (Egyptian spiny mo	Q9QY94
DBDB_22_02.raw	2061	K.SLTSPLDDTEVK[.K	2	1	816.1	3.179	0.3552	1308.66	1.19494	0.91	45	(Q9QY76) VAPB_MOUSE Vesicle-associated membrane protein-associated protein B -	Q9QY76	1.17462	0.0287368
DBDB_33_01.raw	2260	K.SVEALDHDGVVEM*IR[.K	2	1	685.3	5.495	0.5766	1689.82	-	0.98	176	(Q9QY76) VAPB_MOUSE Vesicle-associated membrane protein-associated protein B -	Q9QY76
DBDB_33_02.raw	2312	K.VEQVLSLEPQHELK[.F	3	2	458.4	4.186	0.3078	1652.89	1.1543	0.93	21	(Q9QY76) VAPB_MOUSE Vesicle-associated membrane protein-associated protein B -	Q9QY76
DBDB_33_02.raw	2334	K.VEQVLSLEPQHELK[.F	2	1	1493.3	3.858	0.415	1652.89	-	0.98	146	(Q9QY76) VAPB_MOUSE Vesicle-associated membrane protein-associated protein B -	Q9QY76
DBDB_06_01.raw	4207	R.DLLLVARGLAGK[.L	2	1	522.5	2.832	0.1566	1229.76	-	0.86	50	(Q9QY40) PLXB3_MOUSE Plexin-B3 precursor - Mus musculus (Mouse)	Q9QY40	NA	NA
DBDB_40_01.raw	2390	K.FCITMCKKLTEK[.L	2	1	534.2	2.906	0.1252	1562.79	-	0.84	28	(Q9QY01) ULK2_MOUSE Serine/threonine-protein kinase ULK2 - Mus musculus (Mouse	Q9QY01	NA	NA
DBDB_21_02.raw	2057	K.AGSELLESSAGDDASSLR.S	2	2	482.5	3.578	0.1379	1764.82	1.1186	0.84	15	(Q9QXZ0) MACF1_MOUSE Microtubule-actin cross-linking factor 1 - Mus musculus (	Q9QXZ0	1.11863	4.24264e-05
DBDB_19_01.raw	2189	K.DASTCQEQLDEFR.K	2	1	769.8	2.985	0.2846	1598.68	-	0.96	68	(Q9QXZ0) MACF1_MOUSE Microtubule-actin cross-linking factor 1 - Mus musculus (	Q9QXZ0
DBDB_19_02.raw	2125	K.DASTCQEQLDEFR.K	2	1	511.1	2.515	0.2582	1598.68	-	0.86	10	(Q9QXZ0) MACF1_MOUSE Microtubule-actin cross-linking factor 1 - Mus musculus (	Q9QXZ0
DBDB_19_02.raw	2466	R.DTDSLQSQIEDVR.L	2	1	1052.2	3.892	0.43	1505.71	1.11866	0.87	148	(Q9QXZ0) MACF1_MOUSE Microtubule-actin cross-linking factor 1 - Mus musculus (	Q9QXZ0
DBDB_24_02.raw	1523	R.LQCQLQENEEFQK.N	2	1	1400.2	3.678	0.168	1693.79	-	0.97	158	(Q9QXZ0) MACF1_MOUSE Microtubule-actin cross-linking factor 1 - Mus musculus (	Q9QXZ0
DBDB_19_01.raw	1123	R.TSLAGDTSNSSSPASTGAK.A	2	1	1292.1	3.467	0.4576	1738.81	-	0.93	1	(Q9QXZ0) MACF1_MOUSE Microtubule-actin cross-linking factor 1 - Mus musculus (	Q9QXZ0
DBDB_19_03.raw	1150	R.TSLAGDTSNSSSPASTGAK.A	2	1	1185.3	3.028	0.3769	1738.81	-	0.71	35	(Q9QXZ0) MACF1_MOUSE Microtubule-actin cross-linking factor 1 - Mus musculus (	Q9QXZ0
DBDB_19_01.raw	2949	K.DPEVFQTVSDGLK.K	2	1	1033.4	3.238	0.3071	1434.71	0.82752	0.96	93	(Q9QXY6) EHD3_MOUSE EH domain-containing protein 3 - Mus musculus (Mouse)	Q9QXY6	0.780631	0.368758
DBDB_19_03.raw	2989	K.DPEVFQTVSDGLK.K	2	1	1053.9	3.451	0.3987	1434.71	0.94672	0.91	29	(Q9QXY6) EHD3_MOUSE EH domain-containing protein 3 - Mus musculus (Mouse)	Q9QXY6
DBDB_19_02.raw	2936	K.DPEVFQTVSDGLK[.K	2	1	1182.9	4.2	0.4892	1438.71	1.00623	0.92	62	(Q9QXY6) EHD3_MOUSE EH domain-containing protein 3 - Mus musculus (Mouse)	Q9QXY6
DBDB_19_03.raw	2968	K.DPEVFQTVSDGLK[.K	2	1	1197.7	3.784	0.4473	1438.71	1.02227	0.96	134	(Q9QXY6) EHD3_MOUSE EH domain-containing protein 3 - Mus musculus (Mouse)	Q9QXY6
DBDB_27_02.raw	4134	K.GGAFEGTLQGPFGHGYGEGAGEGIDDAEWVVAR.D	3	1	2025.7	7.407	0.5706	3306.51	0.55638	0.97	205	(Q9QXY6) EHD3_MOUSE EH domain-containing protein 3 - Mus musculus (Mouse)	Q9QXY6
DBDB_27_03.raw	4052	K.GGAFEGTLQGPFGHGYGEGAGEGIDDAEWVVAR.D	3	1	1950.1	7.591	0.5716	3306.51	0.33171	0.95	65	(Q9QXY6) EHD3_MOUSE EH domain-containing protein 3 - Mus musculus (Mouse)	Q9QXY6
DBDB_27_03.raw	4197	K.GGAFEGTLQGPFGHGYGEGAGEGIDDAEWVVAR.D	3	1	1543.5	6.419	0.547	3306.51	0.22354	0.98	192	(Q9QXY6) EHD3_MOUSE EH domain-containing protein 3 - Mus musculus (Mouse)	Q9QXY6
DBDB_27_01.raw	4013	K.GGAFEGTLQGPFGHGYGEGAGEGIDDAEWVVAR[.D	3	1	542	5.389	0.4645	3310.51	0.43639	0.89	22	(Q9QXY6) EHD3_MOUSE EH domain-containing protein 3 - Mus musculus (Mouse)	Q9QXY6
DBDB_39_01.raw	2207	R.EHQISPGDFPNLK[.K	2	1	426.9	2.212	0.1202	1485.74	-	0.96	180	(Q9QXY6) EHD3_MOUSE EH domain-containing protein 3 - Mus musculus (Mouse)	Q9QXY6
DBDB_39_02.raw	2275	R.EHQISPGDFPNLK[.K	2	1	655.3	2.592	0.1707	1485.74	-	0.98	94	(Q9QXY6) EHD3_MOUSE EH domain-containing protein 3 - Mus musculus (Mouse)	Q9QXY6
DBDB_39_03.raw	2243	R.EHQISPGDFPNLK[.K	2	1	606.4	2.34	0.1406	1485.74	-	0.86	5	(Q9QXY6) EHD3_MOUSE EH domain-containing protein 3 - Mus musculus (Mouse)	Q9QXY6
DBDB_42_01.raw	2706	R.EHQISPGDFPNLK[.K	2	1	899.9	2.912	0.2054	1485.74	1.1818	0.96	50	(Q9QXY6) EHD3_MOUSE EH domain-containing protein 3 - Mus musculus (Mouse)	Q9QXY6
DBDB_42_03.raw	2718	R.EHQISPGDFPNLK[.K	2	2	704.6	2.962	0.2313	1485.74	1.27375	0.82	20	(Q9QXY6) EHD3_MOUSE EH domain-containing protein 3 - Mus musculus (Mouse)	Q9QXY6
DBDB_17_01.raw	5004	K.ASFANEDGQVSPGSLLLAGAIAGM*PAASLVTPADVIK[.T	3	1	492	3.007	0.1462	3558.84	-	0.94	39	(Q9QXX4) CMC2_MOUSE Calcium-binding mitochondrial carrier protein Aralar2 - Mu	Q9QXX4	0.977425	0.287593
DBDB_17_01.raw	5495	K.ASFANEDGQVSPGSLLLAGAIAGMPAASLVTPADVIK[.T	3	1	518.3	3.057	0.4022	3542.85	0.76716	0.98	158	(Q9QXX4) CMC2_MOUSE Calcium-binding mitochondrial carrier protein Aralar2 - Mu	Q9QXX4
DBDB_22_01.raw	2526	K.TVELLSGVVDQTK.D	2	1	822	3.351	0.2263	1388.76	-	0.98	124	(Q9QXX4) CMC2_MOUSE Calcium-binding mitochondrial carrier protein Aralar2 - Mu	Q9QXX4
DBDB_22_02.raw	2604	K.TVELLSGVVDQTK.D	2	1	1146.6	3.39	0.188	1388.76	-	0.94	83	(Q9QXX4) CMC2_MOUSE Calcium-binding mitochondrial carrier protein Aralar2 - Mu	Q9QXX4
DBDB_22_03.raw	2501	K.TVELLSGVVDQTK.D	2	1	1204.3	3.365	0.1837	1388.76	-	0.74	7	(Q9QXX4) CMC2_MOUSE Calcium-binding mitochondrial carrier protein Aralar2 - Mu	Q9QXX4
DBDB_34_01.raw	2216	K.TYIIGELHPDDR[.S	2	1	1629.6	4.204	0.3785	1432.71	-	0.94	70	(Q9QXX4) CMC2_MOUSE Calcium-binding mitochondrial carrier protein Aralar2 - Mu	Q9QXX4
DBDB_20_01.raw	4250	R.FGLGSIAGAVGATAVYPIDLVK.T	2	1	1492.5	5.525	0.5356	2119.18	0.70746	0.96	99	(Q9QXX4) CMC2_MOUSE Calcium-binding mitochondrial carrier protein Aralar2 - Mu	Q9QXX4
DBDB_20_02.raw	4726	R.FGLGSIAGAVGATAVYPIDLVK.T	2	1	1083.7	4.244	0.448	2119.18	0.51394	0.97	19	(Q9QXX4) CMC2_MOUSE Calcium-binding mitochondrial carrier protein Aralar2 - Mu	Q9QXX4
DBDB_21_02.raw	4038	R.IAPLEEGMLPFNLAEAQR.Q	2	1	700.8	3.892	0.5621	1999.03	1.01728	0.97	276	(Q9QXX4) CMC2_MOUSE Calcium-binding mitochondrial carrier protein Aralar2 - Mu	Q9QXX4
DBDB_21_03.raw	4138	R.IAPLEEGMLPFNLAEAQR.Q	2	1	942.5	4.7	0.5063	1999.03	0.90352	0.82	52	(Q9QXX4) CMC2_MOUSE Calcium-binding mitochondrial carrier protein Aralar2 - Mu	Q9QXX4
DBDB_21_01.raw	4069	R.IAPLEEGMLPFNLAEAQR[.Q	2	1	1174.8	4.35	0.3748	2003.03	0.82533	0.79	52	(Q9QXX4) CMC2_MOUSE Calcium-binding mitochondrial carrier protein Aralar2 - Mu	Q9QXX4
DBDB_21_02.raw	4111	R.IAPLEEGMLPFNLAEAQR[.Q	2	1	1014.5	4.139	0.3655	2003.03	-	0.97	234	(Q9QXX4) CMC2_MOUSE Calcium-binding mitochondrial carrier protein Aralar2 - Mu	Q9QXX4
DBDB_34_01.raw	2175	R.ITLPAPNPDHVGGYK.L	2	1	548.6	2.807	0.445	1578.83	1.17267	0.91	36	(Q9QXX4) CMC2_MOUSE Calcium-binding mitochondrial carrier protein Aralar2 - Mu	Q9QXX4
DBDB_34_03.raw	2207	R.ITLPAPNPDHVGGYK.L	2	1	747.5	3.25	0.4721	1578.83	1.02203	0.84	23	(Q9QXX4) CMC2_MOUSE Calcium-binding mitochondrial carrier protein Aralar2 - Mu	Q9QXX4
DBDB_34_02.raw	2137	R.ITLPAPNPDHVGGYK[.L	2	1	437.9	3.349	0.3752	1582.83	1.11329	0.86	53	(Q9QXX4) CMC2_MOUSE Calcium-binding mitochondrial carrier protein Aralar2 - Mu	Q9QXX4
DBDB_25_01.raw	2288	R.YLNIFGESQPNPK[.T	2	1	799.8	2.772	0.1927	1510.76	1.10744	0.88	2	(Q9QXX4) CMC2_MOUSE Calcium-binding mitochondrial carrier protein Aralar2 - Mu	Q9QXX4
DBDB_25_03.raw	2409	R.YLNIFGESQPNPK[.T	2	1	1027.2	3.637	0.2778	1510.76	1.60155	0.96	92	(Q9QXX4) CMC2_MOUSE Calcium-binding mitochondrial carrier protein Aralar2 - Mu	Q9QXX4
DBDB_34_03.raw	1322	K.EYGEQIDPSTHR.K	2	1	431.3	3.326	0.4311	1431.65	1.10521	0.99	216	(Q9QXT0) CNPY2_MOUSE Protein canopy homolog 2 precursor - Mus musculus (Mouse)	Q9QXT0	1.01838	0.0891119
DBDB_34_01.raw	1293	K.EYGEQIDPSTHR[.K	2	1	318.9	3.808	0.323	1435.65	1.02167	0.87	51	(Q9QXT0) CNPY2_MOUSE Protein canopy homolog 2 precursor - Mus musculus (Mouse)	Q9QXT0
DBDB_34_03.raw	1334	K.EYGEQIDPSTHR[.K	2	1	331.4	3.645	0.3486	1435.65	1.05146	0.97	76	(Q9QXT0) CNPY2_MOUSE Protein canopy homolog 2 precursor - Mus musculus (Mouse)	Q9QXT0
DBDB_23_01.raw	4100	R.ALVDELEWEIAR.V	2	1	611.9	2.142	0.2317	1443.75	0.89518	0.7	8	(Q9QXT0) CNPY2_MOUSE Protein canopy homolog 2 precursor - Mus musculus (Mouse)	Q9QXT0
DBDB_21_01.raw	1886	R.SPSDSSTASTPIAEQIER.A	2	1	1770.2	5.837	0.584	1875.89	0.57539	0.98	190	(Q9QXS6) DREB_MOUSE Drebrin - Mus musculus (Mouse)	Q9QXS6	0.661173	0.131955
DBDB_21_02.raw	1831	R.SPSDSSTASTPIAEQIER.A	3	1	597.5	4.017	0.4799	1875.89	0.81312	0.89	83	(Q9QXS6) DREB_MOUSE Drebrin - Mus musculus (Mouse)	Q9QXS6
DBDB_21_03.raw	1906	R.SPSDSSTASTPIAEQIER.A	2	1	1527.2	5.454	0.5427	1875.89	0.59501	0.95	126	(Q9QXS6) DREB_MOUSE Drebrin - Mus musculus (Mouse)	Q9QXS6
DBDB_27_02.raw	1779	K.AFCGFEDPR.T	2	1	1016.5	2.969	0.4895	1098.48	0.89092	0.94	42	(Q9QXS1) PLEC1_MOUSE Plectin-1 - Mus musculus (Mouse)	Q9QXS1	1.04252	0.257245
DBDB_30_02.raw	1327	K.DTHDQLSEPSEVR.S	2	1	1123.6	3.574	0.3158	1512.69	0.84902	0.85	6	(Q9QXS1) PLEC1_MOUSE Plectin-1 - Mus musculus (Mouse)	Q9QXS1
DBDB_30_03.raw	1322	K.DTHDQLSEPSEVR.S	3	2	646.8	3.446	0.3026	1512.69	-	0.97	119	(Q9QXS1) PLEC1_MOUSE Plectin-1 - Mus musculus (Mouse)	Q9QXS1
DBDB_22_02.raw	2718	K.VLALPEPSPAAPTLR.S	2	1	334.3	2.627	0.2815	1531.88	0.85263	0.96	49	(Q9QXS1) PLEC1_MOUSE Plectin-1 - Mus musculus (Mouse)	Q9QXS1
DBDB_17_02.raw	3293	R.DAPDGPSVEAEPEYTFEGLR[.Q	2	1	508.3	3.93	0.4022	2182.98	1.198	0.95	151	(Q9QXS1) PLEC1_MOUSE Plectin-1 - Mus musculus (Mouse)	Q9QXS1
DBDB_19_02.raw	2754	R.LLDPEDVDVPQPDEK[.S	2	1	736	3.195	0.3784	1712.83	1.42205	0.88	1	(Q9QXS1) PLEC1_MOUSE Plectin-1 - Mus musculus (Mouse)	Q9QXS1
DBDB_23_01.raw	4855	R.YLQDLLAWVEENQR.R	2	1	691.1	2.43	0.2388	1776.89	-	0.76	6	(Q9QXS1) PLEC1_MOUSE Plectin-1 - Mus musculus (Mouse)	Q9QXS1
DBDB_57_01.raw	4873	K.AHPDKDWFHLVGLLHDLGK[.I	3	1	529.7	3.403	0.2867	2202.15	1.10064	0.83	5	(Q9QXN5) MIOX_MOUSE Inositol oxygenase - Mus musculus (Mouse)	Q9QXN5	1.2526	0.1813
DBDB_53_02.raw	2163	K.LM*HTHQTVDFVSR[.K	2	1	773.5	4.078	0.4178	1590.77	1.14901	0.78	40	(Q9QXN5) MIOX_MOUSE Inositol oxygenase - Mus musculus (Mouse)	Q9QXN5
DBDB_25_02.raw	2982	K.VDVGPDPSLVYRPDVDPEM*AK.S	2	1	466.3	3.356	0.4234	2315.12	1.04572	0.95	58	(Q9QXN5) MIOX_MOUSE Inositol oxygenase - Mus musculus (Mouse)	Q9QXN5
DBDB_25_01.raw	3159	K.VDVGPDPSLVYRPDVDPEMAK.S	2	1	467.8	3.459	0.4885	2299.13	1.23817	0.82	21	(Q9QXN5) MIOX_MOUSE Inositol oxygenase - Mus musculus (Mouse)	Q9QXN5
DBDB_25_02.raw	3198	K.VDVGPDPSLVYRPDVDPEMAK.S	2	1	629.2	3.134	0.5455	2299.13	1.43932	0.84	40	(Q9QXN5) MIOX_MOUSE Inositol oxygenase - Mus musculus (Mouse)	Q9QXN5
DBDB_25_03.raw	3200	K.VDVGPDPSLVYRPDVDPEMAK.S	2	1	421.7	2.901	0.5433	2299.13	1.10033	0.95	59	(Q9QXN5) MIOX_MOUSE Inositol oxygenase - Mus musculus (Mouse)	Q9QXN5
DBDB_25_01.raw	3180	K.VDVGPDPSLVYRPDVDPEMAK[.S	2	1	460.5	3.997	0.4842	2303.13	-	0.97	122	(Q9QXN5) MIOX_MOUSE Inositol oxygenase - Mus musculus (Mouse)	Q9QXN5
DBDB_25_02.raw	3193	K.VDVGPDPSLVYRPDVDPEMAK[.S	2	1	460.4	4.079	0.4743	2303.13	1.3231	0.96	238	(Q9QXN5) MIOX_MOUSE Inositol oxygenase - Mus musculus (Mouse)	Q9QXN5
DBDB_25_03.raw	3179	K.VDVGPDPSLVYRPDVDPEMAK[.S	2	1	459.7	3.996	0.453	2303.13	1.27435	0.91	15	(Q9QXN5) MIOX_MOUSE Inositol oxygenase - Mus musculus (Mouse)	Q9QXN5
DBDB_02_01.raw	4445	R.QLCSQQDLDMLPWVQEFNK.F	2	1	692	3.121	0.2492	2379.12	-	0.87	34	(Q9QXN5) MIOX_MOUSE Inositol oxygenase - Mus musculus (Mouse)	Q9QXN5
DBDB_21_01.raw	4373	R.QLCSQQDLDMLPWVQEFNK.F	2	1	659.1	4.515	0.5448	2379.12	1.60279	0.92	16	(Q9QXN5) MIOX_MOUSE Inositol oxygenase - Mus musculus (Mouse)	Q9QXN5
DBDB_02_03.raw	4481	R.QLCSQQDLDMLPWVQEFNK[.F	2	2	360.5	3.387	0.2873	2383.12	-	0.91	29	(Q9QXN5) MIOX_MOUSE Inositol oxygenase - Mus musculus (Mouse)	Q9QXN5
DBDB_19_02.raw	1684	K.DSTQPGMTTGLDPK.F	2	1	493.5	2.828	0.3584	1447.67	0.935	0.91	37	(Q9QXD8) LIMD1_MOUSE LIM domain-containing protein 1 - Mus musculus (Mouse)	Q9QXD8	0.935	NA
DBDB_38_01.raw	3487	K.AGGLATTGDKDILDIVPTEIHQK.A	2	1	1149.6	5.614	0.5251	2392.27	1.23423	0.97	129	(Q9QXD6) F16P1_MOUSE Fructose-1,6-bisphosphatase 1 - Mus musculus (Mouse)	Q9QXD6	0.807579	0.288952
DBDB_38_01.raw	3612	K.AGGLATTGDKDILDIVPTEIHQK.A	3	1	853.3	6.982	0.5283	2392.27	1.05195	0.92	12	(Q9QXD6) F16P1_MOUSE Fructose-1,6-bisphosphatase 1 - Mus musculus (Mouse)	Q9QXD6
DBDB_38_01.raw	3875	K.AGGLATTGDKDILDIVPTEIHQK.A	3	1	536.4	4.758	0.3789	2392.27	-	0.89	16	(Q9QXD6) F16P1_MOUSE Fructose-1,6-bisphosphatase 1 - Mus musculus (Mouse)	Q9QXD6
DBDB_38_02.raw	3415	K.AGGLATTGDKDILDIVPTEIHQK.A	2	1	1317.6	5.683	0.5124	2392.27	1.00869	0.97	123	(Q9QXD6) F16P1_MOUSE Fructose-1,6-bisphosphatase 1 - Mus musculus (Mouse)	Q9QXD6
DBDB_38_02.raw	3714	K.AGGLATTGDKDILDIVPTEIHQK.A	3	1	621.5	5.019	0.5185	2392.27	-	0.95	127	(Q9QXD6) F16P1_MOUSE Fructose-1,6-bisphosphatase 1 - Mus musculus (Mouse)	Q9QXD6
DBDB_38_02.raw	3787	K.AGGLATTGDKDILDIVPTEIHQK.A	4	1	946.2	3.319	0.2567	2392.27	-	0.97	102	(Q9QXD6) F16P1_MOUSE Fructose-1,6-bisphosphatase 1 - Mus musculus (Mouse)	Q9QXD6
DBDB_38_03.raw	3476	K.AGGLATTGDKDILDIVPTEIHQK.A	2	1	1050	5.284	0.4459	2392.27	1.02176	0.97	60	(Q9QXD6) F16P1_MOUSE Fructose-1,6-bisphosphatase 1 - Mus musculus (Mouse)	Q9QXD6
DBDB_38_03.raw	3605	K.AGGLATTGDKDILDIVPTEIHQK.A	2	1	1187.9	5.065	0.5039	2392.27	0.94266	0.96	95	(Q9QXD6) F16P1_MOUSE Fructose-1,6-bisphosphatase 1 - Mus musculus (Mouse)	Q9QXD6
DBDB_38_03.raw	3710	K.AGGLATTGDKDILDIVPTEIHQK.A	3	1	813.1	5.815	0.4975	2392.27	1.077	0.98	146	(Q9QXD6) F16P1_MOUSE Fructose-1,6-bisphosphatase 1 - Mus musculus (Mouse)	Q9QXD6
DBDB_38_01.raw	3484	K.AGGLATTGDKDILDIVPTEIHQK[.A	3	2	1026.2	6.536	0.3047	2396.27	1.10923	0.98	257	(Q9QXD6) F16P1_MOUSE Fructose-1,6-bisphosphatase 1 - Mus musculus (Mouse)	Q9QXD6
DBDB_38_01.raw	3740	K.AGGLATTGDKDILDIVPTEIHQK[.A	3	1	724.6	5.502	0.31	2396.27	0.88611	0.74	55	(Q9QXD6) F16P1_MOUSE Fructose-1,6-bisphosphatase 1 - Mus musculus (Mouse)	Q9QXD6
DBDB_38_02.raw	3431	K.AGGLATTGDKDILDIVPTEIHQK[.A	3	2	976.4	6.194	0.2401	2396.27	1.01907	0.77	105	(Q9QXD6) F16P1_MOUSE Fructose-1,6-bisphosphatase 1 - Mus musculus (Mouse)	Q9QXD6
DBDB_38_02.raw	3564	K.AGGLATTGDKDILDIVPTEIHQK[.A	3	1	901.7	6.23	0.3518	2396.27	0.96532	0.96	115	(Q9QXD6) F16P1_MOUSE Fructose-1,6-bisphosphatase 1 - Mus musculus (Mouse)	Q9QXD6
DBDB_38_03.raw	3454	K.AGGLATTGDKDILDIVPTEIHQK[.A	3	2	788.7	5.673	0.3096	2396.27	1.30081	0.88	22	(Q9QXD6) F16P1_MOUSE Fructose-1,6-bisphosphatase 1 - Mus musculus (Mouse)	Q9QXD6
DBDB_38_03.raw	3581	K.AGGLATTGDKDILDIVPTEIHQK[.A	3	1	1135.7	6.186	0.2724	2396.27	1.19016	0.93	105	(Q9QXD6) F16P1_MOUSE Fructose-1,6-bisphosphatase 1 - Mus musculus (Mouse)	Q9QXD6
DBDB_20_01.raw	3313	K.APVVM*GSSEDVQEFLEIYR.K	2	1	1895.6	5.198	0.6522	2185.05	0.66566	0.96	1	(Q9QXD6) F16P1_MOUSE Fructose-1,6-bisphosphatase 1 - Mus musculus (Mouse)	Q9QXD6
DBDB_20_03.raw	3737	K.APVVM*GSSEDVQEFLEIYR.K	2	1	1961.9	4.88	0.6407	2185.05	0.82595	0.97	124	(Q9QXD6) F16P1_MOUSE Fructose-1,6-bisphosphatase 1 - Mus musculus (Mouse)	Q9QXD6
DBDB_20_03.raw	3870	K.APVVM*GSSEDVQEFLEIYR.K	2	1	1205.1	3.591	0.3917	2185.05	-	0.98	150	(Q9QXD6) F16P1_MOUSE Fructose-1,6-bisphosphatase 1 - Mus musculus (Mouse)	Q9QXD6
DBDB_20_02.raw	3776	K.APVVM*GSSEDVQEFLEIYR[.K	2	1	543	3.351	0.4371	2189.05	-	0.85	52	(Q9QXD6) F16P1_MOUSE Fructose-1,6-bisphosphatase 1 - Mus musculus (Mouse)	Q9QXD6
DBDB_20_01.raw	3640	K.APVVMGSSEDVQEFLEIYR.K	2	2	523	3.45	0.2512	2169.05	0.44225	0.9	17	(Q9QXD6) F16P1_MOUSE Fructose-1,6-bisphosphatase 1 - Mus musculus (Mouse)	Q9QXD6
DBDB_20_01.raw	3740	K.APVVMGSSEDVQEFLEIYR.K	3	1	1588.9	4.894	0.4279	2169.05	0.47381	0.94	92	(Q9QXD6) F16P1_MOUSE Fructose-1,6-bisphosphatase 1 - Mus musculus (Mouse)	Q9QXD6
DBDB_20_01.raw	4169	K.APVVMGSSEDVQEFLEIYR.K	2	1	721	3.381	0.2206	2169.05	0.31305	0.87	5	(Q9QXD6) F16P1_MOUSE Fructose-1,6-bisphosphatase 1 - Mus musculus (Mouse)	Q9QXD6
DBDB_20_01.raw	4682	K.APVVMGSSEDVQEFLEIYR.K	2	1	1100.2	3.938	0.4259	2169.05	-	0.94	71	(Q9QXD6) F16P1_MOUSE Fructose-1,6-bisphosphatase 1 - Mus musculus (Mouse)	Q9QXD6
DBDB_20_01.raw	5150	K.APVVMGSSEDVQEFLEIYR.K	2	1	1763.7	4.755	0.578	2169.05	-	0.95	87	(Q9QXD6) F16P1_MOUSE Fructose-1,6-bisphosphatase 1 - Mus musculus (Mouse)	Q9QXD6
DBDB_20_01.raw	5334	K.APVVMGSSEDVQEFLEIYR.K	2	1	1575	4.287	0.5081	2169.05	-	0.95	121	(Q9QXD6) F16P1_MOUSE Fructose-1,6-bisphosphatase 1 - Mus musculus (Mouse)	Q9QXD6
DBDB_20_01.raw	5462	K.APVVMGSSEDVQEFLEIYR.K	2	1	2202.4	4.703	0.4907	2169.05	-	0.88	75	(Q9QXD6) F16P1_MOUSE Fructose-1,6-bisphosphatase 1 - Mus musculus (Mouse)	Q9QXD6
DBDB_20_01.raw	5849	K.APVVMGSSEDVQEFLEIYR.K	2	1	1206.6	4.369	0.4886	2169.05	-	0.82	18	(Q9QXD6) F16P1_MOUSE Fructose-1,6-bisphosphatase 1 - Mus musculus (Mouse)	Q9QXD6
DBDB_20_01.raw	6228	K.APVVMGSSEDVQEFLEIYR.K	2	1	1103.4	3.651	0.3023	2169.05	-	0.7	21	(Q9QXD6) F16P1_MOUSE Fructose-1,6-bisphosphatase 1 - Mus musculus (Mouse)	Q9QXD6
DBDB_20_01.raw	6503	K.APVVMGSSEDVQEFLEIYR.K	3	1	1654.7	4.138	0.4607	2169.05	-	0.98	268	(Q9QXD6) F16P1_MOUSE Fructose-1,6-bisphosphatase 1 - Mus musculus (Mouse)	Q9QXD6
DBDB_20_01.raw	6635	K.APVVMGSSEDVQEFLEIYR.K	3	1	1469.8	4.595	0.4504	2169.05	-	0.93	48	(Q9QXD6) F16P1_MOUSE Fructose-1,6-bisphosphatase 1 - Mus musculus (Mouse)	Q9QXD6
DBDB_20_02.raw	4352	K.APVVMGSSEDVQEFLEIYR.K	2	1	522	3.204	0.1775	2169.05	0.30796	0.99	264	(Q9QXD6) F16P1_MOUSE Fructose-1,6-bisphosphatase 1 - Mus musculus (Mouse)	Q9QXD6
DBDB_20_02.raw	4931	K.APVVMGSSEDVQEFLEIYR.K	3	1	791.8	3.766	0.3565	2169.05	0.51512	0.94	68	(Q9QXD6) F16P1_MOUSE Fructose-1,6-bisphosphatase 1 - Mus musculus (Mouse)	Q9QXD6
DBDB_20_02.raw	5185	K.APVVMGSSEDVQEFLEIYR.K	2	1	1074	3.699	0.2869	2169.05	-	0.72	7	(Q9QXD6) F16P1_MOUSE Fructose-1,6-bisphosphatase 1 - Mus musculus (Mouse)	Q9QXD6
DBDB_20_02.raw	5319	K.APVVMGSSEDVQEFLEIYR.K	2	1	539.9	3.276	0.1613	2169.05	-	0.96	81	(Q9QXD6) F16P1_MOUSE Fructose-1,6-bisphosphatase 1 - Mus musculus (Mouse)	Q9QXD6
DBDB_20_02.raw	5598	K.APVVMGSSEDVQEFLEIYR.K	2	1	1045.5	3.804	0.3374	2169.05	-	0.86	36	(Q9QXD6) F16P1_MOUSE Fructose-1,6-bisphosphatase 1 - Mus musculus (Mouse)	Q9QXD6
DBDB_20_02.raw	5729	K.APVVMGSSEDVQEFLEIYR.K	2	1	948.1	3.72	0.3148	2169.05	-	0.9	8	(Q9QXD6) F16P1_MOUSE Fructose-1,6-bisphosphatase 1 - Mus musculus (Mouse)	Q9QXD6
DBDB_20_02.raw	5848	K.APVVMGSSEDVQEFLEIYR.K	2	1	1482.1	4.339	0.4239	2169.05	-	0.95	59	(Q9QXD6) F16P1_MOUSE Fructose-1,6-bisphosphatase 1 - Mus musculus (Mouse)	Q9QXD6
DBDB_20_02.raw	5955	K.APVVMGSSEDVQEFLEIYR.K	3	2	1489.9	4.006	0.2299	2169.05	0.47108	0.92	6	(Q9QXD6) F16P1_MOUSE Fructose-1,6-bisphosphatase 1 - Mus musculus (Mouse)	Q9QXD6
DBDB_20_02.raw	6101	K.APVVMGSSEDVQEFLEIYR.K	2	1	1780.9	4.937	0.4716	2169.05	-	0.91	25	(Q9QXD6) F16P1_MOUSE Fructose-1,6-bisphosphatase 1 - Mus musculus (Mouse)	Q9QXD6
DBDB_20_02.raw	6233	K.APVVMGSSEDVQEFLEIYR.K	2	1	1702.2	5.087	0.4351	2169.05	-	0.98	156	(Q9QXD6) F16P1_MOUSE Fructose-1,6-bisphosphatase 1 - Mus musculus (Mouse)	Q9QXD6
DBDB_20_02.raw	6259	K.APVVMGSSEDVQEFLEIYR.K	3	1	1313.6	4.197	0.2975	2169.05	0.44117	0.73	23	(Q9QXD6) F16P1_MOUSE Fructose-1,6-bisphosphatase 1 - Mus musculus (Mouse)	Q9QXD6
DBDB_20_02.raw	6491	K.APVVMGSSEDVQEFLEIYR.K	2	1	1244.9	3.51	0.426	2169.05	-	0.94	2	(Q9QXD6) F16P1_MOUSE Fructose-1,6-bisphosphatase 1 - Mus musculus (Mouse)	Q9QXD6
DBDB_20_02.raw	6623	K.APVVMGSSEDVQEFLEIYR.K	2	1	1273.3	4.767	0.5128	2169.05	-	0.83	10	(Q9QXD6) F16P1_MOUSE Fructose-1,6-bisphosphatase 1 - Mus musculus (Mouse)	Q9QXD6
DBDB_20_02.raw	6748	K.APVVMGSSEDVQEFLEIYR.K	2	1	486.9	3.873	0.409	2169.05	-	0.94	81	(Q9QXD6) F16P1_MOUSE Fructose-1,6-bisphosphatase 1 - Mus musculus (Mouse)	Q9QXD6
DBDB_20_02.raw	6751	K.APVVMGSSEDVQEFLEIYR.K	3	1	2071.4	4.496	0.435	2169.05	0.49749	0.91	76	(Q9QXD6) F16P1_MOUSE Fructose-1,6-bisphosphatase 1 - Mus musculus (Mouse)	Q9QXD6
DBDB_20_02.raw	6871	K.APVVMGSSEDVQEFLEIYR.K	3	1	2139.1	4.474	0.3067	2169.05	0.54124	0.97	123	(Q9QXD6) F16P1_MOUSE Fructose-1,6-bisphosphatase 1 - Mus musculus (Mouse)	Q9QXD6
DBDB_20_02.raw	7247	K.APVVMGSSEDVQEFLEIYR.K	2	1	1131	4.284	0.4803	2169.05	-	0.89	44	(Q9QXD6) F16P1_MOUSE Fructose-1,6-bisphosphatase 1 - Mus musculus (Mouse)	Q9QXD6
DBDB_20_02.raw	7491	K.APVVMGSSEDVQEFLEIYR.K	3	1	1422.1	3.913	0.3463	2169.05	-	0.93	53	(Q9QXD6) F16P1_MOUSE Fructose-1,6-bisphosphatase 1 - Mus musculus (Mouse)	Q9QXD6
DBDB_20_02.raw	9218	K.APVVMGSSEDVQEFLEIYR.K	3	1	1873.5	4.4	0.3536	2169.05	-	0.9	17	(Q9QXD6) F16P1_MOUSE Fructose-1,6-bisphosphatase 1 - Mus musculus (Mouse)	Q9QXD6
DBDB_20_02.raw	9249	K.APVVMGSSEDVQEFLEIYR.K	2	1	1115.9	4.43	0.408	2169.05	-	0.87	90	(Q9QXD6) F16P1_MOUSE Fructose-1,6-bisphosphatase 1 - Mus musculus (Mouse)	Q9QXD6
DBDB_20_03.raw	4914	K.APVVMGSSEDVQEFLEIYR.K	3	1	731.5	3.261	0.2883	2169.05	0.62404	0.98	124	(Q9QXD6) F16P1_MOUSE Fructose-1,6-bisphosphatase 1 - Mus musculus (Mouse)	Q9QXD6
DBDB_20_03.raw	4951	K.APVVMGSSEDVQEFLEIYR.K	2	1	626.9	3.45	0.2623	2169.05	0.35028	0.89	5	(Q9QXD6) F16P1_MOUSE Fructose-1,6-bisphosphatase 1 - Mus musculus (Mouse)	Q9QXD6
DBDB_20_03.raw	5078	K.APVVMGSSEDVQEFLEIYR.K	2	1	559.6	3.06	0.1971	2169.05	-	0.76	15	(Q9QXD6) F16P1_MOUSE Fructose-1,6-bisphosphatase 1 - Mus musculus (Mouse)	Q9QXD6
DBDB_20_03.raw	5465	K.APVVMGSSEDVQEFLEIYR.K	2	1	811.4	3.576	0.2989	2169.05	-	0.91	7	(Q9QXD6) F16P1_MOUSE Fructose-1,6-bisphosphatase 1 - Mus musculus (Mouse)	Q9QXD6
DBDB_20_03.raw	6274	K.APVVMGSSEDVQEFLEIYR.K	2	1	2332.9	5.007	0.523	2169.05	-	0.9	50	(Q9QXD6) F16P1_MOUSE Fructose-1,6-bisphosphatase 1 - Mus musculus (Mouse)	Q9QXD6
DBDB_20_03.raw	6367	K.APVVMGSSEDVQEFLEIYR.K	3	1	1859.6	4.28	0.3706	2169.05	0.53181	0.93	29	(Q9QXD6) F16P1_MOUSE Fructose-1,6-bisphosphatase 1 - Mus musculus (Mouse)	Q9QXD6
DBDB_20_03.raw	6404	K.APVVMGSSEDVQEFLEIYR.K	2	1	1791.2	4.766	0.4317	2169.05	-	0.97	120	(Q9QXD6) F16P1_MOUSE Fructose-1,6-bisphosphatase 1 - Mus musculus (Mouse)	Q9QXD6
DBDB_20_03.raw	6529	K.APVVMGSSEDVQEFLEIYR.K	2	1	730.7	3.975	0.4271	2169.05	-	0.94	90	(Q9QXD6) F16P1_MOUSE Fructose-1,6-bisphosphatase 1 - Mus musculus (Mouse)	Q9QXD6
DBDB_20_03.raw	6754	K.APVVMGSSEDVQEFLEIYR.K	3	1	1981.7	4.49	0.4489	2169.05	0.59765	0.95	49	(Q9QXD6) F16P1_MOUSE Fructose-1,6-bisphosphatase 1 - Mus musculus (Mouse)	Q9QXD6
DBDB_20_03.raw	6878	K.APVVMGSSEDVQEFLEIYR.K	3	1	1705.5	4.186	0.4503	2169.05	0.72199	0.95	147	(Q9QXD6) F16P1_MOUSE Fructose-1,6-bisphosphatase 1 - Mus musculus (Mouse)	Q9QXD6
DBDB_20_03.raw	7373	K.APVVMGSSEDVQEFLEIYR.K	3	1	730.1	3.685	0.3752	2169.05	-	0.91	6	(Q9QXD6) F16P1_MOUSE Fructose-1,6-bisphosphatase 1 - Mus musculus (Mouse)	Q9QXD6
DBDB_21_01.raw	4252	K.APVVMGSSEDVQEFLEIYR.K	2	1	834.5	3.124	0.3458	2169.05	-	0.98	83	(Q9QXD6) F16P1_MOUSE Fructose-1,6-bisphosphatase 1 - Mus musculus (Mouse)	Q9QXD6
DBDB_21_01.raw	6128	K.APVVMGSSEDVQEFLEIYR.K	3	1	954.1	3.573	0.3278	2169.05	-	0.87	26	(Q9QXD6) F16P1_MOUSE Fructose-1,6-bisphosphatase 1 - Mus musculus (Mouse)	Q9QXD6
DBDB_21_01.raw	6369	K.APVVMGSSEDVQEFLEIYR.K	3	1	913.7	3.544	0.2794	2169.05	-	0.97	268	(Q9QXD6) F16P1_MOUSE Fructose-1,6-bisphosphatase 1 - Mus musculus (Mouse)	Q9QXD6
DBDB_21_01.raw	7112	K.APVVMGSSEDVQEFLEIYR.K	3	1	1369.6	3.604	0.2027	2169.05	-	0.98	185	(Q9QXD6) F16P1_MOUSE Fructose-1,6-bisphosphatase 1 - Mus musculus (Mouse)	Q9QXD6
DBDB_21_03.raw	7330	K.APVVMGSSEDVQEFLEIYR.K	3	1	601.8	3.331	0.1665	2169.05	-	0.91	67	(Q9QXD6) F16P1_MOUSE Fructose-1,6-bisphosphatase 1 - Mus musculus (Mouse)	Q9QXD6
DBDB_20_01.raw	3603	K.APVVMGSSEDVQEFLEIYR[.K	3	1	1541.6	4.044	0.2573	2173.05	0.36842	0.95	105	(Q9QXD6) F16P1_MOUSE Fructose-1,6-bisphosphatase 1 - Mus musculus (Mouse)	Q9QXD6
DBDB_20_01.raw	3628	K.APVVMGSSEDVQEFLEIYR[.K	2	1	3244.2	6.294	0.5243	2173.05	0.47613	0.94	39	(Q9QXD6) F16P1_MOUSE Fructose-1,6-bisphosphatase 1 - Mus musculus (Mouse)	Q9QXD6
DBDB_20_01.raw	3766	K.APVVMGSSEDVQEFLEIYR[.K	2	1	3177.6	6.506	0.5418	2173.05	-	0.96	108	(Q9QXD6) F16P1_MOUSE Fructose-1,6-bisphosphatase 1 - Mus musculus (Mouse)	Q9QXD6
DBDB_20_01.raw	4016	K.APVVMGSSEDVQEFLEIYR[.K	3	2	695.5	3.16	0.1276	2173.05	0.45324	0.92	132	(Q9QXD6) F16P1_MOUSE Fructose-1,6-bisphosphatase 1 - Mus musculus (Mouse)	Q9QXD6
DBDB_20_01.raw	4635	K.APVVMGSSEDVQEFLEIYR[.K	2	1	2541.8	5.305	0.5002	2173.05	-	0.99	120	(Q9QXD6) F16P1_MOUSE Fructose-1,6-bisphosphatase 1 - Mus musculus (Mouse)	Q9QXD6
DBDB_20_01.raw	4940	K.APVVMGSSEDVQEFLEIYR[.K	2	1	2837.4	5.671	0.4873	2173.05	-	0.94	56	(Q9QXD6) F16P1_MOUSE Fructose-1,6-bisphosphatase 1 - Mus musculus (Mouse)	Q9QXD6
DBDB_20_01.raw	5298	K.APVVMGSSEDVQEFLEIYR[.K	2	1	1907.6	4.94	0.4139	2173.05	-	0.87	24	(Q9QXD6) F16P1_MOUSE Fructose-1,6-bisphosphatase 1 - Mus musculus (Mouse)	Q9QXD6
DBDB_20_01.raw	5631	K.APVVMGSSEDVQEFLEIYR[.K	3	1	1816.5	3.97	0.2487	2173.05	-	0.93	83	(Q9QXD6) F16P1_MOUSE Fructose-1,6-bisphosphatase 1 - Mus musculus (Mouse)	Q9QXD6
DBDB_20_01.raw	5753	K.APVVMGSSEDVQEFLEIYR[.K	3	1	1528	3.985	0.2615	2173.05	-	0.66	5	(Q9QXD6) F16P1_MOUSE Fructose-1,6-bisphosphatase 1 - Mus musculus (Mouse)	Q9QXD6
DBDB_20_01.raw	5876	K.APVVMGSSEDVQEFLEIYR[.K	3	1	2004.3	4.168	0.2291	2173.05	-	0.98	269	(Q9QXD6) F16P1_MOUSE Fructose-1,6-bisphosphatase 1 - Mus musculus (Mouse)	Q9QXD6
DBDB_20_01.raw	5985	K.APVVMGSSEDVQEFLEIYR[.K	2	1	1180.3	3.712	0.5131	2173.05	-	0.88	37	(Q9QXD6) F16P1_MOUSE Fructose-1,6-bisphosphatase 1 - Mus musculus (Mouse)	Q9QXD6
DBDB_20_01.raw	6008	K.APVVMGSSEDVQEFLEIYR[.K	3	1	1932.1	4.588	0.2344	2173.05	-	0.82	40	(Q9QXD6) F16P1_MOUSE Fructose-1,6-bisphosphatase 1 - Mus musculus (Mouse)	Q9QXD6
DBDB_20_01.raw	6131	K.APVVMGSSEDVQEFLEIYR[.K	3	1	1836.9	4.823	0.3361	2173.05	-	0.74	15	(Q9QXD6) F16P1_MOUSE Fructose-1,6-bisphosphatase 1 - Mus musculus (Mouse)	Q9QXD6
DBDB_20_01.raw	6253	K.APVVMGSSEDVQEFLEIYR[.K	3	1	1861.1	4.343	0.3067	2173.05	-	0.95	61	(Q9QXD6) F16P1_MOUSE Fructose-1,6-bisphosphatase 1 - Mus musculus (Mouse)	Q9QXD6
DBDB_20_01.raw	6900	K.APVVMGSSEDVQEFLEIYR[.K	3	1	1804	3.608	0.1435	2173.05	-	0.83	42	(Q9QXD6) F16P1_MOUSE Fructose-1,6-bisphosphatase 1 - Mus musculus (Mouse)	Q9QXD6
DBDB_20_01.raw	7294	K.APVVMGSSEDVQEFLEIYR[.K	3	1	801.8	3.167	0.1969	2173.05	-	0.56	27	(Q9QXD6) F16P1_MOUSE Fructose-1,6-bisphosphatase 1 - Mus musculus (Mouse)	Q9QXD6
DBDB_20_02.raw	10207	K.APVVMGSSEDVQEFLEIYR[.K	3	1	1166.7	3.183	0.184	2173.05	-	0.8	88	(Q9QXD6) F16P1_MOUSE Fructose-1,6-bisphosphatase 1 - Mus musculus (Mouse)	Q9QXD6
DBDB_20_02.raw	4012	K.APVVMGSSEDVQEFLEIYR[.K	2	1	3328.7	5.892	0.5179	2173.05	-	0.97	191	(Q9QXD6) F16P1_MOUSE Fructose-1,6-bisphosphatase 1 - Mus musculus (Mouse)	Q9QXD6
DBDB_20_02.raw	4151	K.APVVMGSSEDVQEFLEIYR[.K	2	1	3249.3	6.251	0.5194	2173.05	-	0.96	146	(Q9QXD6) F16P1_MOUSE Fructose-1,6-bisphosphatase 1 - Mus musculus (Mouse)	Q9QXD6
DBDB_20_02.raw	4291	K.APVVMGSSEDVQEFLEIYR[.K	2	1	3144.4	6.06	0.5364	2173.05	0.25485	0.86	133	(Q9QXD6) F16P1_MOUSE Fructose-1,6-bisphosphatase 1 - Mus musculus (Mouse)	Q9QXD6
DBDB_20_02.raw	4375	K.APVVMGSSEDVQEFLEIYR[.K	3	1	916.7	3.767	0.2398	2173.05	0.28745	0.85	23	(Q9QXD6) F16P1_MOUSE Fructose-1,6-bisphosphatase 1 - Mus musculus (Mouse)	Q9QXD6
DBDB_20_02.raw	4445	K.APVVMGSSEDVQEFLEIYR[.K	2	1	3567.3	6.082	0.5179	2173.05	-	0.98	66	(Q9QXD6) F16P1_MOUSE Fructose-1,6-bisphosphatase 1 - Mus musculus (Mouse)	Q9QXD6
DBDB_20_02.raw	4717	K.APVVMGSSEDVQEFLEIYR[.K	2	1	2569	4.136	0.3911	2173.05	-	0.96	234	(Q9QXD6) F16P1_MOUSE Fructose-1,6-bisphosphatase 1 - Mus musculus (Mouse)	Q9QXD6
DBDB_20_02.raw	4843	K.APVVMGSSEDVQEFLEIYR[.K	2	1	1706.9	3.715	0.3659	2173.05	-	0.96	134	(Q9QXD6) F16P1_MOUSE Fructose-1,6-bisphosphatase 1 - Mus musculus (Mouse)	Q9QXD6
DBDB_20_02.raw	5651	K.APVVMGSSEDVQEFLEIYR[.K	2	1	2222.9	5.096	0.4315	2173.05	-	0.93	34	(Q9QXD6) F16P1_MOUSE Fructose-1,6-bisphosphatase 1 - Mus musculus (Mouse)	Q9QXD6
DBDB_20_02.raw	5978	K.APVVMGSSEDVQEFLEIYR[.K	2	1	1669.1	4.116	0.4175	2173.05	-	0.93	30	(Q9QXD6) F16P1_MOUSE Fructose-1,6-bisphosphatase 1 - Mus musculus (Mouse)	Q9QXD6
DBDB_20_02.raw	6514	K.APVVMGSSEDVQEFLEIYR[.K	3	1	1649.2	3.393	0.1952	2173.05	0.55337	0.9	79	(Q9QXD6) F16P1_MOUSE Fructose-1,6-bisphosphatase 1 - Mus musculus (Mouse)	Q9QXD6
DBDB_20_02.raw	6634	K.APVVMGSSEDVQEFLEIYR[.K	3	1	1187.6	3.088	0.1565	2173.05	0.59295	0.85	31	(Q9QXD6) F16P1_MOUSE Fructose-1,6-bisphosphatase 1 - Mus musculus (Mouse)	Q9QXD6
DBDB_20_02.raw	7861	K.APVVMGSSEDVQEFLEIYR[.K	2	1	913.9	4.056	0.5261	2173.05	-	0.98	216	(Q9QXD6) F16P1_MOUSE Fructose-1,6-bisphosphatase 1 - Mus musculus (Mouse)	Q9QXD6
DBDB_20_03.raw	4204	K.APVVMGSSEDVQEFLEIYR[.K	2	1	3076.8	4.989	0.4406	2173.05	-	0.89	60	(Q9QXD6) F16P1_MOUSE Fructose-1,6-bisphosphatase 1 - Mus musculus (Mouse)	Q9QXD6
DBDB_20_03.raw	4347	K.APVVMGSSEDVQEFLEIYR[.K	2	1	2865.6	4.504	0.4347	2173.05	-	0.96	4	(Q9QXD6) F16P1_MOUSE Fructose-1,6-bisphosphatase 1 - Mus musculus (Mouse)	Q9QXD6
DBDB_20_03.raw	4478	K.APVVMGSSEDVQEFLEIYR[.K	2	1	3312.1	5.996	0.4991	2173.05	-	0.99	273	(Q9QXD6) F16P1_MOUSE Fructose-1,6-bisphosphatase 1 - Mus musculus (Mouse)	Q9QXD6
DBDB_20_03.raw	4741	K.APVVMGSSEDVQEFLEIYR[.K	2	1	3520.1	5.967	0.5336	2173.05	-	0.98	132	(Q9QXD6) F16P1_MOUSE Fructose-1,6-bisphosphatase 1 - Mus musculus (Mouse)	Q9QXD6
DBDB_20_03.raw	4867	K.APVVMGSSEDVQEFLEIYR[.K	2	1	3026.2	5.921	0.5218	2173.05	-	0.97	101	(Q9QXD6) F16P1_MOUSE Fructose-1,6-bisphosphatase 1 - Mus musculus (Mouse)	Q9QXD6
DBDB_20_03.raw	5044	K.APVVMGSSEDVQEFLEIYR[.K	3	2	514.1	3.212	0.1814	2173.05	-	0.8	83	(Q9QXD6) F16P1_MOUSE Fructose-1,6-bisphosphatase 1 - Mus musculus (Mouse)	Q9QXD6
DBDB_20_03.raw	5138	K.APVVMGSSEDVQEFLEIYR[.K	2	1	3073.1	5.29	0.4311	2173.05	-	0.96	63	(Q9QXD6) F16P1_MOUSE Fructose-1,6-bisphosphatase 1 - Mus musculus (Mouse)	Q9QXD6
DBDB_20_03.raw	5588	K.APVVMGSSEDVQEFLEIYR[.K	3	1	954.8	3.731	0.2843	2173.05	-	0.8	42	(Q9QXD6) F16P1_MOUSE Fructose-1,6-bisphosphatase 1 - Mus musculus (Mouse)	Q9QXD6
DBDB_20_03.raw	5734	K.APVVMGSSEDVQEFLEIYR[.K	2	1	1166	4.208	0.1236	2173.05	-	0.97	83	(Q9QXD6) F16P1_MOUSE Fructose-1,6-bisphosphatase 1 - Mus musculus (Mouse)	Q9QXD6
DBDB_20_03.raw	6070	K.APVVMGSSEDVQEFLEIYR[.K	2	1	2650.9	5.379	0.5285	2173.05	-	0.93	131	(Q9QXD6) F16P1_MOUSE Fructose-1,6-bisphosphatase 1 - Mus musculus (Mouse)	Q9QXD6
DBDB_20_02.raw	3345	K.AQGTGELTQLLNSLCTAIK.A	2	1	718.2	2.778	0.1583	2018.07	-	0.97	116	(Q9QXD6) F16P1_MOUSE Fructose-1,6-bisphosphatase 1 - Mus musculus (Mouse)	Q9QXD6
DBDB_20_03.raw	3453	K.AQGTGELTQLLNSLCTAIK.A	2	1	621	2.643	0.1562	2018.07	-	0.91	1	(Q9QXD6) F16P1_MOUSE Fructose-1,6-bisphosphatase 1 - Mus musculus (Mouse)	Q9QXD6
DBDB_22_01.raw	4947	K.AQGTGELTQLLNSLCTAIK.A	2	1	1481.5	5.12	0.4971	2018.07	1.34606	0.9	49	(Q9QXD6) F16P1_MOUSE Fructose-1,6-bisphosphatase 1 - Mus musculus (Mouse)	Q9QXD6
DBDB_22_02.raw	4804	K.AQGTGELTQLLNSLCTAIK.A	2	1	1661.3	6.019	0.5696	2018.07	1.07773	0.95	11	(Q9QXD6) F16P1_MOUSE Fructose-1,6-bisphosphatase 1 - Mus musculus (Mouse)	Q9QXD6
DBDB_22_02.raw	4883	K.AQGTGELTQLLNSLCTAIK.A	3	1	909.4	3.968	0.289	2018.07	0.71126	0.97	27	(Q9QXD6) F16P1_MOUSE Fructose-1,6-bisphosphatase 1 - Mus musculus (Mouse)	Q9QXD6
DBDB_22_02.raw	4944	K.AQGTGELTQLLNSLCTAIK.A	2	1	1022.4	5.152	0.5105	2018.07	1.36453	0.95	58	(Q9QXD6) F16P1_MOUSE Fructose-1,6-bisphosphatase 1 - Mus musculus (Mouse)	Q9QXD6
DBDB_22_02.raw	5036	K.AQGTGELTQLLNSLCTAIK.A	3	1	697.2	3.396	0.2974	2018.07	0.85916	0.65	37	(Q9QXD6) F16P1_MOUSE Fructose-1,6-bisphosphatase 1 - Mus musculus (Mouse)	Q9QXD6
DBDB_22_02.raw	5094	K.AQGTGELTQLLNSLCTAIK.A	2	1	607.1	3.794	0.3684	2018.07	-	0.94	33	(Q9QXD6) F16P1_MOUSE Fructose-1,6-bisphosphatase 1 - Mus musculus (Mouse)	Q9QXD6
DBDB_22_03.raw	4710	K.AQGTGELTQLLNSLCTAIK.A	3	1	1230.3	5.156	0.371	2018.07	0.9934	0.87	1	(Q9QXD6) F16P1_MOUSE Fructose-1,6-bisphosphatase 1 - Mus musculus (Mouse)	Q9QXD6
DBDB_22_03.raw	4995	K.AQGTGELTQLLNSLCTAIK.A	3	1	656.5	3.382	0.2839	2018.07	0.74915	0.95	118	(Q9QXD6) F16P1_MOUSE Fructose-1,6-bisphosphatase 1 - Mus musculus (Mouse)	Q9QXD6
DBDB_22_01.raw	4678	K.AQGTGELTQLLNSLCTAIK[.A	2	1	496.4	3.38	0.2875	2022.07	1.02823	0.97	172	(Q9QXD6) F16P1_MOUSE Fructose-1,6-bisphosphatase 1 - Mus musculus (Mouse)	Q9QXD6
DBDB_22_01.raw	4720	K.AQGTGELTQLLNSLCTAIK[.A	3	1	1148	4.616	0.3253	2022.07	0.96346	0.93	140	(Q9QXD6) F16P1_MOUSE Fructose-1,6-bisphosphatase 1 - Mus musculus (Mouse)	Q9QXD6
DBDB_22_01.raw	4811	K.AQGTGELTQLLNSLCTAIK[.A	2	1	1317.4	5.676	0.5811	2022.07	1.13073	0.9	33	(Q9QXD6) F16P1_MOUSE Fructose-1,6-bisphosphatase 1 - Mus musculus (Mouse)	Q9QXD6
DBDB_22_01.raw	4866	K.AQGTGELTQLLNSLCTAIK[.A	3	1	641.3	4.153	0.3069	2022.07	-	0.8	7	(Q9QXD6) F16P1_MOUSE Fructose-1,6-bisphosphatase 1 - Mus musculus (Mouse)	Q9QXD6
DBDB_22_02.raw	4713	K.AQGTGELTQLLNSLCTAIK[.A	2	1	645.3	5.242	0.5243	2022.07	1.01489	0.97	156	(Q9QXD6) F16P1_MOUSE Fructose-1,6-bisphosphatase 1 - Mus musculus (Mouse)	Q9QXD6
DBDB_22_02.raw	4748	K.AQGTGELTQLLNSLCTAIK[.A	3	1	1228.2	4.322	0.3276	2022.07	0.9815	0.83	186	(Q9QXD6) F16P1_MOUSE Fructose-1,6-bisphosphatase 1 - Mus musculus (Mouse)	Q9QXD6
DBDB_22_02.raw	4846	K.AQGTGELTQLLNSLCTAIK[.A	2	1	1086.2	5.666	0.5474	2022.07	1.0993	0.95	102	(Q9QXD6) F16P1_MOUSE Fructose-1,6-bisphosphatase 1 - Mus musculus (Mouse)	Q9QXD6
DBDB_22_02.raw	4979	K.AQGTGELTQLLNSLCTAIK[.A	2	1	1059.3	5.439	0.5521	2022.07	-	0.7	11	(Q9QXD6) F16P1_MOUSE Fructose-1,6-bisphosphatase 1 - Mus musculus (Mouse)	Q9QXD6
DBDB_22_03.raw	4766	K.AQGTGELTQLLNSLCTAIK[.A	2	1	713.7	3.915	0.3433	2022.07	1.18202	0.92	19	(Q9QXD6) F16P1_MOUSE Fructose-1,6-bisphosphatase 1 - Mus musculus (Mouse)	Q9QXD6
DBDB_22_03.raw	4864	K.AQGTGELTQLLNSLCTAIK[.A	3	2	510.9	3.389	0.1693	2022.07	-	0.97	123	(Q9QXD6) F16P1_MOUSE Fructose-1,6-bisphosphatase 1 - Mus musculus (Mouse)	Q9QXD6
DBDB_22_03.raw	4898	K.AQGTGELTQLLNSLCTAIK[.A	2	1	1248.8	4.443	0.4564	2022.07	1.41275	0.9	18	(Q9QXD6) F16P1_MOUSE Fructose-1,6-bisphosphatase 1 - Mus musculus (Mouse)	Q9QXD6
DBDB_16_01.raw	3239	K.DFDPAINEYLQR.K	2	1	1538.8	4.08	0.3859	1480.71	0.64075	0.99	316	(Q9QXD6) F16P1_MOUSE Fructose-1,6-bisphosphatase 1 - Mus musculus (Mouse)	Q9QXD6
DBDB_16_02.raw	3247	K.DFDPAINEYLQR.K	2	1	1768.4	3.219	0.4274	1480.71	0.63468	0.93	152	(Q9QXD6) F16P1_MOUSE Fructose-1,6-bisphosphatase 1 - Mus musculus (Mouse)	Q9QXD6
DBDB_16_03.raw	3234	K.DFDPAINEYLQR.K	2	1	1512.3	3.61	0.4334	1480.71	0.66125	0.96	136	(Q9QXD6) F16P1_MOUSE Fructose-1,6-bisphosphatase 1 - Mus musculus (Mouse)	Q9QXD6
DBDB_18_01.raw	2870	K.DFDPAINEYLQR.K	2	1	1033.2	2.378	0.2894	1480.71	-	0.9	41	(Q9QXD6) F16P1_MOUSE Fructose-1,6-bisphosphatase 1 - Mus musculus (Mouse)	Q9QXD6
DBDB_18_01.raw	2872	K.DFDPAINEYLQR.K	3	1	1503.1	3.023	0.2274	1480.71	-	0.97	93	(Q9QXD6) F16P1_MOUSE Fructose-1,6-bisphosphatase 1 - Mus musculus (Mouse)	Q9QXD6
DBDB_18_02.raw	2924	K.DFDPAINEYLQR.K	3	1	1594.2	3.386	0.2358	1480.71	-	0.78	54	(Q9QXD6) F16P1_MOUSE Fructose-1,6-bisphosphatase 1 - Mus musculus (Mouse)	Q9QXD6
DBDB_19_01.raw	3029	K.DFDPAINEYLQR.K	2	1	919.1	2.049	0.1393	1480.71	-	0.97	217	(Q9QXD6) F16P1_MOUSE Fructose-1,6-bisphosphatase 1 - Mus musculus (Mouse)	Q9QXD6
DBDB_19_01.raw	3243	K.DFDPAINEYLQR.K	2	1	1480.3	3.849	0.4169	1480.71	0.56492	0.89	54	(Q9QXD6) F16P1_MOUSE Fructose-1,6-bisphosphatase 1 - Mus musculus (Mouse)	Q9QXD6
DBDB_19_01.raw	3449	K.DFDPAINEYLQR.K	2	1	963.7	2.183	0.2488	1480.71	-	0.9	27	(Q9QXD6) F16P1_MOUSE Fructose-1,6-bisphosphatase 1 - Mus musculus (Mouse)	Q9QXD6
DBDB_19_02.raw	2971	K.DFDPAINEYLQR.K	2	1	939.9	2.214	0.2577	1480.71	-	0.48	3	(Q9QXD6) F16P1_MOUSE Fructose-1,6-bisphosphatase 1 - Mus musculus (Mouse)	Q9QXD6
DBDB_19_02.raw	3216	K.DFDPAINEYLQR.K	2	1	1629.7	3.657	0.362	1480.71	0.55731	0.98	298	(Q9QXD6) F16P1_MOUSE Fructose-1,6-bisphosphatase 1 - Mus musculus (Mouse)	Q9QXD6
DBDB_19_03.raw	3230	K.DFDPAINEYLQR.K	2	1	1332	3.808	0.402	1480.71	0.64975	0.97	216	(Q9QXD6) F16P1_MOUSE Fructose-1,6-bisphosphatase 1 - Mus musculus (Mouse)	Q9QXD6
DBDB_19_03.raw	3438	K.DFDPAINEYLQR.K	2	1	1299.8	2.412	0.3218	1480.71	-	0.95	122	(Q9QXD6) F16P1_MOUSE Fructose-1,6-bisphosphatase 1 - Mus musculus (Mouse)	Q9QXD6
DBDB_20_01.raw	2705	K.DFDPAINEYLQR.K	2	1	963.8	3.038	0.4998	1480.71	0.75195	0.82	18	(Q9QXD6) F16P1_MOUSE Fructose-1,6-bisphosphatase 1 - Mus musculus (Mouse)	Q9QXD6
DBDB_20_01.raw	2714	K.DFDPAINEYLQR.K	3	1	2501.1	4.941	0.3095	1480.71	0.65729	0.96	45	(Q9QXD6) F16P1_MOUSE Fructose-1,6-bisphosphatase 1 - Mus musculus (Mouse)	Q9QXD6
DBDB_20_02.raw	2936	K.DFDPAINEYLQR.K	2	1	1504.9	3.977	0.4356	1480.71	0.81157	0.87	66	(Q9QXD6) F16P1_MOUSE Fructose-1,6-bisphosphatase 1 - Mus musculus (Mouse)	Q9QXD6
DBDB_20_02.raw	2966	K.DFDPAINEYLQR.K	3	1	1963.6	4.851	0.2785	1480.71	0.7364	0.83	50	(Q9QXD6) F16P1_MOUSE Fructose-1,6-bisphosphatase 1 - Mus musculus (Mouse)	Q9QXD6
DBDB_20_02.raw	3069	K.DFDPAINEYLQR.K	2	1	1414.1	3.804	0.4412	1480.71	0.66295	0.88	31	(Q9QXD6) F16P1_MOUSE Fructose-1,6-bisphosphatase 1 - Mus musculus (Mouse)	Q9QXD6
DBDB_20_03.raw	3095	K.DFDPAINEYLQR.K	3	1	2488.3	4.826	0.2879	1480.71	0.74397	0.83	7	(Q9QXD6) F16P1_MOUSE Fructose-1,6-bisphosphatase 1 - Mus musculus (Mouse)	Q9QXD6
DBDB_20_03.raw	3187	K.DFDPAINEYLQR.K	2	1	971	3.731	0.4566	1480.71	0.79472	0.97	108	(Q9QXD6) F16P1_MOUSE Fructose-1,6-bisphosphatase 1 - Mus musculus (Mouse)	Q9QXD6
DBDB_19_02.raw	3222	K.DFDPAINEYLQR[.K	2	1	1092.2	3.529	0.4216	1484.71	0.48263	0.82	19	(Q9QXD6) F16P1_MOUSE Fructose-1,6-bisphosphatase 1 - Mus musculus (Mouse)	Q9QXD6
DBDB_20_01.raw	2696	K.DFDPAINEYLQR[.K	2	1	953.9	3.778	0.4075	1484.71	0.80319	0.9	33	(Q9QXD6) F16P1_MOUSE Fructose-1,6-bisphosphatase 1 - Mus musculus (Mouse)	Q9QXD6
DBDB_20_02.raw	2947	K.DFDPAINEYLQR[.K	2	1	1163.2	4.816	0.5153	1484.71	0.80098	0.94	18	(Q9QXD6) F16P1_MOUSE Fructose-1,6-bisphosphatase 1 - Mus musculus (Mouse)	Q9QXD6
DBDB_29_01.raw	3329	K.DILDIVPTEIHQK.A	2	1	728.1	3.728	0.4055	1520.83	-	0.86	19	(Q9QXD6) F16P1_MOUSE Fructose-1,6-bisphosphatase 1 - Mus musculus (Mouse)	Q9QXD6
DBDB_29_02.raw	3303	K.DILDIVPTEIHQK.A	2	1	903.3	4.018	0.3928	1520.83	-	0.8	22	(Q9QXD6) F16P1_MOUSE Fructose-1,6-bisphosphatase 1 - Mus musculus (Mouse)	Q9QXD6
DBDB_29_02.raw	3431	K.DILDIVPTEIHQK.A	2	1	816.1	4.002	0.5373	1520.83	0.86808	0.97	157	(Q9QXD6) F16P1_MOUSE Fructose-1,6-bisphosphatase 1 - Mus musculus (Mouse)	Q9QXD6
DBDB_29_01.raw	3459	K.DILDIVPTEIHQK[.A	2	1	822.5	3.598	0.3514	1524.83	1.04025	0.96	123	(Q9QXD6) F16P1_MOUSE Fructose-1,6-bisphosphatase 1 - Mus musculus (Mouse)	Q9QXD6
DBDB_29_03.raw	3294	K.DILDIVPTEIHQK[.A	2	1	731.7	4.287	0.4083	1524.83	1.10466	0.92	15	(Q9QXD6) F16P1_MOUSE Fructose-1,6-bisphosphatase 1 - Mus musculus (Mouse)	Q9QXD6
DBDB_29_03.raw	3423	K.DILDIVPTEIHQK[.A	2	1	662.9	4.337	0.4337	1524.83	0.97125	0.75	1	(Q9QXD6) F16P1_MOUSE Fructose-1,6-bisphosphatase 1 - Mus musculus (Mouse)	Q9QXD6
DBDB_19_01.raw	4067	K.LDILSNDLVINM*LK.S	2	1	1620.4	3.084	0.2404	1616.89	-	0.98	192	(Q9QXD6) F16P1_MOUSE Fructose-1,6-bisphosphatase 1 - Mus musculus (Mouse)	Q9QXD6
DBDB_19_02.raw	3993	K.LDILSNDLVINM*LK.S	2	1	813.4	2.461	0.2867	1616.89	-	0.96	78	(Q9QXD6) F16P1_MOUSE Fructose-1,6-bisphosphatase 1 - Mus musculus (Mouse)	Q9QXD6
DBDB_21_02.raw	3823	K.LDILSNDLVINM*LK.S	2	1	1683.7	4.242	0.1815	1616.89	1.0237	0.96	227	(Q9QXD6) F16P1_MOUSE Fructose-1,6-bisphosphatase 1 - Mus musculus (Mouse)	Q9QXD6
DBDB_21_03.raw	3899	K.LDILSNDLVINM*LK.S	2	1	1670.8	3.688	0.128	1616.89	0.79626	0.66	3	(Q9QXD6) F16P1_MOUSE Fructose-1,6-bisphosphatase 1 - Mus musculus (Mouse)	Q9QXD6
DBDB_21_01.raw	3882	K.LDILSNDLVINM*LK[.S	2	1	1935.4	4.527	0.4187	1620.89	1.16908	0.9	80	(Q9QXD6) F16P1_MOUSE Fructose-1,6-bisphosphatase 1 - Mus musculus (Mouse)	Q9QXD6
DBDB_19_01.raw	4805	K.LDILSNDLVINMLK.S	2	1	1388.1	3.488	0.3532	1600.9	-	0.94	45	(Q9QXD6) F16P1_MOUSE Fructose-1,6-bisphosphatase 1 - Mus musculus (Mouse)	Q9QXD6
DBDB_19_03.raw	4783	K.LDILSNDLVINMLK.S	2	1	1237.4	3.35	0.2604	1600.9	-	0.91	32	(Q9QXD6) F16P1_MOUSE Fructose-1,6-bisphosphatase 1 - Mus musculus (Mouse)	Q9QXD6
DBDB_20_01.raw	4433	K.LDILSNDLVINMLK.S	2	1	2096.8	3.749	0.3365	1600.9	-	0.82	34	(Q9QXD6) F16P1_MOUSE Fructose-1,6-bisphosphatase 1 - Mus musculus (Mouse)	Q9QXD6
DBDB_21_01.raw	5176	K.LDILSNDLVINMLK.S	2	1	821.7	3.493	0.3174	1600.9	0.53342	0.91	84	(Q9QXD6) F16P1_MOUSE Fructose-1,6-bisphosphatase 1 - Mus musculus (Mouse)	Q9QXD6
DBDB_21_02.raw	4742	K.LDILSNDLVINMLK.S	2	1	527.9	2.956	0.215	1600.9	1.08079	0.77	44	(Q9QXD6) F16P1_MOUSE Fructose-1,6-bisphosphatase 1 - Mus musculus (Mouse)	Q9QXD6
DBDB_21_02.raw	5336	K.LDILSNDLVINMLK.S	2	2	373.2	2.351	0.1927	1600.9	0.93573	0.81	12	(Q9QXD6) F16P1_MOUSE Fructose-1,6-bisphosphatase 1 - Mus musculus (Mouse)	Q9QXD6
DBDB_21_03.raw	4855	K.LDILSNDLVINMLK.S	2	1	1081.1	4.282	0.238	1600.9	1.21134	0.97	136	(Q9QXD6) F16P1_MOUSE Fructose-1,6-bisphosphatase 1 - Mus musculus (Mouse)	Q9QXD6
DBDB_21_03.raw	6102	K.LDILSNDLVINMLK.S	2	1	651	2.775	0.2591	1600.9	-	0.94	46	(Q9QXD6) F16P1_MOUSE Fructose-1,6-bisphosphatase 1 - Mus musculus (Mouse)	Q9QXD6
DBDB_21_03.raw	6734	K.LDILSNDLVINMLK.S	2	2	310.4	2.993	0.199	1600.9	0.36549	0.89	39	(Q9QXD6) F16P1_MOUSE Fructose-1,6-bisphosphatase 1 - Mus musculus (Mouse)	Q9QXD6
DBDB_21_01.raw	4720	K.LDILSNDLVINMLK[.S	2	1	2119.9	4.852	0.3051	1604.9	1.05304	0.83	27	(Q9QXD6) F16P1_MOUSE Fructose-1,6-bisphosphatase 1 - Mus musculus (Mouse)	Q9QXD6
DBDB_21_01.raw	4755	K.LDILSNDLVINMLK[.S	3	2	1143.4	3.95	0.1484	1604.9	1.01846	0.94	134	(Q9QXD6) F16P1_MOUSE Fructose-1,6-bisphosphatase 1 - Mus musculus (Mouse)	Q9QXD6
DBDB_21_01.raw	4852	K.LDILSNDLVINMLK[.S	2	1	2049.1	4.64	0.3294	1604.9	1.40012	0.92	52	(Q9QXD6) F16P1_MOUSE Fructose-1,6-bisphosphatase 1 - Mus musculus (Mouse)	Q9QXD6
DBDB_21_01.raw	5867	K.LDILSNDLVINMLK[.S	2	1	776.9	3.034	0.302	1604.9	-	0.92	39	(Q9QXD6) F16P1_MOUSE Fructose-1,6-bisphosphatase 1 - Mus musculus (Mouse)	Q9QXD6
DBDB_21_01.raw	6030	K.LDILSNDLVINMLK[.S	2	1	690	2.829	0.2571	1604.9	-	0.93	34	(Q9QXD6) F16P1_MOUSE Fructose-1,6-bisphosphatase 1 - Mus musculus (Mouse)	Q9QXD6
DBDB_21_02.raw	4695	K.LDILSNDLVINMLK[.S	2	1	1971.7	4.01	0.3307	1604.9	1.10239	0.97	121	(Q9QXD6) F16P1_MOUSE Fructose-1,6-bisphosphatase 1 - Mus musculus (Mouse)	Q9QXD6
DBDB_21_02.raw	4772	K.LDILSNDLVINMLK[.S	3	1	1225.5	3.356	0.1528	1604.9	1.05674	0.95	124	(Q9QXD6) F16P1_MOUSE Fructose-1,6-bisphosphatase 1 - Mus musculus (Mouse)	Q9QXD6
DBDB_21_02.raw	4824	K.LDILSNDLVINMLK[.S	2	1	1198.8	4.151	0.2362	1604.9	1.21269	0.9	23	(Q9QXD6) F16P1_MOUSE Fructose-1,6-bisphosphatase 1 - Mus musculus (Mouse)	Q9QXD6
DBDB_21_02.raw	5837	K.LDILSNDLVINMLK[.S	2	1	392.9	2.856	0.2504	1604.9	-	0.76	3	(Q9QXD6) F16P1_MOUSE Fructose-1,6-bisphosphatase 1 - Mus musculus (Mouse)	Q9QXD6
DBDB_21_03.raw	4787	K.LDILSNDLVINMLK[.S	2	1	2148.6	4.968	0.3525	1604.9	1.0343	0.92	69	(Q9QXD6) F16P1_MOUSE Fructose-1,6-bisphosphatase 1 - Mus musculus (Mouse)	Q9QXD6
DBDB_21_03.raw	5601	K.LDILSNDLVINMLK[.S	2	1	975.9	2.885	0.2436	1604.9	0.89731	0.85	6	(Q9QXD6) F16P1_MOUSE Fructose-1,6-bisphosphatase 1 - Mus musculus (Mouse)	Q9QXD6
DBDB_37_01.raw	6447	R.KAQGTGELTQLLNSLCTAIK.A	3	1	642.5	3.154	0.2877	2146.16	0.52564	0.92	58	(Q9QXD6) F16P1_MOUSE Fructose-1,6-bisphosphatase 1 - Mus musculus (Mouse)	Q9QXD6
DBDB_37_01.raw	6580	R.KAQGTGELTQLLNSLCTAIK.A	3	1	649.8	3.105	0.2929	2146.16	-	0.88	133	(Q9QXD6) F16P1_MOUSE Fructose-1,6-bisphosphatase 1 - Mus musculus (Mouse)	Q9QXD6
DBDB_37_02.raw	6033	R.KAQGTGELTQLLNSLCTAIK.A	3	1	612.2	3.354	0.3503	2146.16	0.44666	0.94	166	(Q9QXD6) F16P1_MOUSE Fructose-1,6-bisphosphatase 1 - Mus musculus (Mouse)	Q9QXD6
DBDB_37_03.raw	6255	R.KAQGTGELTQLLNSLCTAIK.A	3	1	680.8	3.493	0.3433	2146.16	0.57652	0.91	86	(Q9QXD6) F16P1_MOUSE Fructose-1,6-bisphosphatase 1 - Mus musculus (Mouse)	Q9QXD6
DBDB_37_03.raw	6371	R.KAQGTGELTQLLNSLCTAIK.A	3	1	619.9	3.662	0.4562	2146.16	0.4875	0.96	57	(Q9QXD6) F16P1_MOUSE Fructose-1,6-bisphosphatase 1 - Mus musculus (Mouse)	Q9QXD6
DBDB_22_02.raw	3110	R.LLYECNPIAYVM*EK[.A	2	1	1493.1	3.182	0.1864	1762.85	0.60421	0.96	43	(Q9QXD6) F16P1_MOUSE Fructose-1,6-bisphosphatase 1 - Mus musculus (Mouse)	Q9QXD6
DBDB_22_01.raw	3664	R.LLYECNPIAYVMEK.A	2	1	2174.8	4.498	0.4638	1742.86	0.44378	0.79	24	(Q9QXD6) F16P1_MOUSE Fructose-1,6-bisphosphatase 1 - Mus musculus (Mouse)	Q9QXD6
DBDB_22_02.raw	3722	R.LLYECNPIAYVMEK.A	2	1	1887.5	3.935	0.4651	1742.86	0.51755	0.96	12	(Q9QXD6) F16P1_MOUSE Fructose-1,6-bisphosphatase 1 - Mus musculus (Mouse)	Q9QXD6
DBDB_22_03.raw	3621	R.LLYECNPIAYVMEK.A	2	1	1979.2	3.928	0.4816	1742.86	0.43309	0.89	38	(Q9QXD6) F16P1_MOUSE Fructose-1,6-bisphosphatase 1 - Mus musculus (Mouse)	Q9QXD6
DBDB_21_01.raw	3004	R.QAGIAQLYGIAGSTNVTGDQVK.K	2	1	1271.3	5.262	0.4708	2191.14	1.03669	0.91	58	(Q9QXD6) F16P1_MOUSE Fructose-1,6-bisphosphatase 1 - Mus musculus (Mouse)	Q9QXD6
DBDB_21_02.raw	2958	R.QAGIAQLYGIAGSTNVTGDQVK.K	2	1	1576.3	5.734	0.5096	2191.14	0.93219	0.81	3	(Q9QXD6) F16P1_MOUSE Fructose-1,6-bisphosphatase 1 - Mus musculus (Mouse)	Q9QXD6
DBDB_21_03.raw	3069	R.QAGIAQLYGIAGSTNVTGDQVK.K	2	1	1772.7	5.102	0.5933	2191.14	0.89833	0.87	30	(Q9QXD6) F16P1_MOUSE Fructose-1,6-bisphosphatase 1 - Mus musculus (Mouse)	Q9QXD6
DBDB_21_03.raw	3088	R.QAGIAQLYGIAGSTNVTGDQVK[.K	2	1	877	5.323	0.3107	2195.14	0.98555	0.83	84	(Q9QXD6) F16P1_MOUSE Fructose-1,6-bisphosphatase 1 - Mus musculus (Mouse)	Q9QXD6
DBDB_23_02.raw	3233	R.TLVYGGIFLYPANK.K	2	1	732.1	2.039	0.1947	1555.85	1.07956	0.77	7	(Q9QXD6) F16P1_MOUSE Fructose-1,6-bisphosphatase 1 - Mus musculus (Mouse)	Q9QXD6
DBDB_23_03.raw	3283	R.TLVYGGIFLYPANK.K	2	1	1509.2	2.782	0.2425	1555.85	0.94543	0.73	29	(Q9QXD6) F16P1_MOUSE Fructose-1,6-bisphosphatase 1 - Mus musculus (Mouse)	Q9QXD6
DBDB_23_03.raw	3415	R.TLVYGGIFLYPANK.K	2	1	1277.4	2.677	0.3205	1555.85	0.85142	0.97	101	(Q9QXD6) F16P1_MOUSE Fructose-1,6-bisphosphatase 1 - Mus musculus (Mouse)	Q9QXD6
DBDB_23_02.raw	4312	R.TLVYGGIFLYPANK[.K	2	2	328	2.026	0.3254	1559.85	0.38216	0.87	72	(Q9QXD6) F16P1_MOUSE Fructose-1,6-bisphosphatase 1 - Mus musculus (Mouse)	Q9QXD6
DBDB_38_01.raw	1320	R.YVGSM*VADIHR.T	2	1	1017.1	2.656	0.4022	1263.62	-	0.79	2	(Q9QXD6) F16P1_MOUSE Fructose-1,6-bisphosphatase 1 - Mus musculus (Mouse)	Q9QXD6
DBDB_38_03.raw	1307	R.YVGSM*VADIHR.T	2	1	918.6	2.575	0.3081	1263.62	-	0.81	16	(Q9QXD6) F16P1_MOUSE Fructose-1,6-bisphosphatase 1 - Mus musculus (Mouse)	Q9QXD6
DBDB_38_02.raw	1331	R.YVGSM*VADIHR[.T	2	1	833.2	2.902	0.4314	1267.62	0.92817	0.85	2	(Q9QXD6) F16P1_MOUSE Fructose-1,6-bisphosphatase 1 - Mus musculus (Mouse)	Q9QXD6
DBDB_38_03.raw	1731	R.YVGSMVADIHR.T	2	1	1112.2	2.784	0.4104	1247.62	1.0562	0.95	86	(Q9QXD6) F16P1_MOUSE Fructose-1,6-bisphosphatase 1 - Mus musculus (Mouse)	Q9QXD6
DBDB_36_01.raw	3212	K.LLDSSTVTHLFK[.I	2	1	846.2	3.196	0.4288	1364.75	1.09275	0.97	99	(Q9QUM9) PSA6_MOUSE Proteasome subunit alpha type-6 - Mus musculus (Mouse)	Q9QUM9	1.08687	0.0419673
DBDB_36_02.raw	3052	K.LLDSSTVTHLFK[.I	2	1	1019.2	2.78	0.3841	1364.75	1.05637	0.8	67	(Q9QUM9) PSA6_MOUSE Proteasome subunit alpha type-6 - Mus musculus (Mouse)	Q9QUM9
DBDB_45_02.raw	1739	R.HITIFSPEGR.L	2	1	632.8	3.06	0.5351	1156.61	1.05437	0.95	20	(Q9QUM9) PSA6_MOUSE Proteasome subunit alpha type-6 - Mus musculus (Mouse)	Q9QUM9
DBDB_45_01.raw	1687	R.HITIFSPEGR[.L	2	1	689.3	2.621	0.3653	1160.61	-	0.95	113	(Q9QUM9) PSA6_MOUSE Proteasome subunit alpha type-6 - Mus musculus (Mouse)	Q9QUM9
DBDB_45_02.raw	1709	R.HITIFSPEGR[.L	2	1	579.8	3.426	0.4306	1160.61	1.14399	0.61	8	(Q9QUM9) PSA6_MOUSE Proteasome subunit alpha type-6 - Mus musculus (Mouse)	Q9QUM9
DBDB_45_03.raw	1666	R.HITIFSPEGR[.L	2	1	359.9	3.071	0.3661	1160.61	-	0.96	21	(Q9QUM9) PSA6_MOUSE Proteasome subunit alpha type-6 - Mus musculus (Mouse)	Q9QUM9
DBDB_16_02.raw	6067	K.DQFPEVYVPTVFENYVADIEVDGK.Q	3	1	676.6	3.025	0.1787	2773.32	0.91218	0.96	81	(Q9QUI0) RHOA_MOUSE Transforming protein RhoA precursor - Mus musculus (Mouse)	Q9QUI0	0.91642	0.00599627
DBDB_16_03.raw	5532	K.DQFPEVYVPTVFENYVADIEVDGK.Q	3	1	1380.9	4.954	0.6023	2773.32	0.92066	0.98	61	(Q9QUI0) RHOA_MOUSE Transforming protein RhoA precursor - Mus musculus (Mouse)	Q9QUI0
DBDB_41_01.raw	3151	K.HFCPNVPIILVGNK.K	2	1	1404.1	3.836	0.5486	1607.88	SHARED	0.96	130	(Q9QUI0) RHOA_MOUSE Transforming protein RhoA precursor - Mus musculus (Mouse)	Q9QUI0
DBDB_41_02.raw	3249	K.HFCPNVPIILVGNK.K	2	1	1573.7	3.609	0.393	1607.88	SHARED	0.84	26	(Q9QUI0) RHOA_MOUSE Transforming protein RhoA precursor - Mus musculus (Mouse)	Q9QUI0
DBDB_41_03.raw	3184	K.HFCPNVPIILVGNK.K	2	1	1372.3	3.677	0.2293	1607.88	SHARED	0.99	204	(Q9QUI0) RHOA_MOUSE Transforming protein RhoA precursor - Mus musculus (Mouse)	Q9QUI0
DBDB_41_03.raw	3236	K.HFCPNVPIILVGNK.K	3	1	1503.7	3.349	0.2293	1607.88	SHARED	0.95	106	(Q9QUI0) RHOA_MOUSE Transforming protein RhoA precursor - Mus musculus (Mouse)	Q9QUI0
DBDB_41_01.raw	3141	K.HFCPNVPIILVGNK[.K	2	1	1143	3.476	0.5486	1611.88	SHARED	0.96	147	(Q9QUI0) RHOA_MOUSE Transforming protein RhoA precursor - Mus musculus (Mouse)	Q9QUI0
DBDB_41_02.raw	3311	K.HFCPNVPIILVGNK[.K	3	2	1059.6	3.724	0.393	1611.88	SHARED	0.95	164	(Q9QUI0) RHOA_MOUSE Transforming protein RhoA precursor - Mus musculus (Mouse)	Q9QUI0
DBDB_41_02.raw	3377	K.HFCPNVPIILVGNK[.K	2	1	1228.3	3.594	0.393	1611.88	SHARED	0.93	1	(Q9QUI0) RHOA_MOUSE Transforming protein RhoA precursor - Mus musculus (Mouse)	Q9QUI0
DBDB_41_03.raw	3227	K.HFCPNVPIILVGNK[.K	2	1	1295.8	3.857	0.2293	1611.88	SHARED	0.98	140	(Q9QUI0) RHOA_MOUSE Transforming protein RhoA precursor - Mus musculus (Mouse)	Q9QUI0
DBDB_24_02.raw	2831	K.TQEILSQLPFK.Q	2	1	1331.2	3.302	0.3775	1303.73	1.10567	0.82	4	(Q9QUH0) GLRX1_MOUSE Glutaredoxin-1 - Mus musculus (Mouse)	Q9QUH0	1.24553	0.175645
DBDB_24_03.raw	2811	K.TQEILSQLPFK.Q	2	1	907.2	2.688	0.1593	1303.73	1.18825	0.82	53	(Q9QUH0) GLRX1_MOUSE Glutaredoxin-1 - Mus musculus (Mouse)	Q9QUH0
DBDB_24_01.raw	2860	K.TQEILSQLPFK[.Q	2	1	1741.6	3.508	0.3886	1307.73	1.44266	0.52	118	(Q9QUH0) GLRX1_MOUSE Glutaredoxin-1 - Mus musculus (Mouse)	Q9QUH0
DBDB_22_02.raw	2979	K.ALVVTVDAPVLGNR.R	2	1	972.3	3.118	0.3189	1423.83	0.92519	0.89	9	(Q9NYQ2) HAOX2_MOUSE Hydroxyacid oxidase 2 - Mus musculus (Mouse)	Q9NYQ2	0.857837	0.178165
DBDB_22_03.raw	2858	K.ALVVTVDAPVLGNR.R	2	1	695.6	2.777	0.2668	1423.83	0.82799	0.91	3	(Q9NYQ2) HAOX2_MOUSE Hydroxyacid oxidase 2 - Mus musculus (Mouse)	Q9NYQ2
DBDB_22_01.raw	2876	K.ALVVTVDAPVLGNR[.R	2	1	744.9	3.159	0.2359	1427.83	0.77591	0.94	117	(Q9NYQ2) HAOX2_MOUSE Hydroxyacid oxidase 2 - Mus musculus (Mouse)	Q9NYQ2
DBDB_25_03.raw	1380	K.IEVYM*DGGVR.T	2	1	949.3	2.488	0.2598	1154.55	0.74183	0.66	1	(Q9NYQ2) HAOX2_MOUSE Hydroxyacid oxidase 2 - Mus musculus (Mouse)	Q9NYQ2
DBDB_25_01.raw	1385	K.IEVYM*DGGVR[.T	2	1	1067.7	3.103	0.3349	1158.55	0.82407	0.98	144	(Q9NYQ2) HAOX2_MOUSE Hydroxyacid oxidase 2 - Mus musculus (Mouse)	Q9NYQ2
DBDB_25_03.raw	1401	K.IEVYM*DGGVR[.T	2	1	873.5	3.185	0.3225	1158.55	0.82756	0.79	150	(Q9NYQ2) HAOX2_MOUSE Hydroxyacid oxidase 2 - Mus musculus (Mouse)	Q9NYQ2
DBDB_19_01.raw	4786	K.TSWDFIEGEADDGITYNDNLAAFR.R	3	1	601.4	3.407	0.315	2720.21	-	0.9	14	(Q9NYQ2) HAOX2_MOUSE Hydroxyacid oxidase 2 - Mus musculus (Mouse)	Q9NYQ2
DBDB_19_01.raw	5374	K.TSWDFIEGEADDGITYNDNLAAFR.R	3	1	615.3	3.189	0.3374	2720.21	0.59422	0.81	32	(Q9NYQ2) HAOX2_MOUSE Hydroxyacid oxidase 2 - Mus musculus (Mouse)	Q9NYQ2
DBDB_19_02.raw	5225	K.TSWDFIEGEADDGITYNDNLAAFR.R	2	1	399.9	2.762	0.4202	2720.21	0.94883	0.75	77	(Q9NYQ2) HAOX2_MOUSE Hydroxyacid oxidase 2 - Mus musculus (Mouse)	Q9NYQ2
DBDB_19_01.raw	11907	K.TSWDFIEGEADDGITYNDNLAAFR[.R	3	2	499.2	3.064	0.2301	2724.21	0.94548	0.96	70	(Q9NYQ2) HAOX2_MOUSE Hydroxyacid oxidase 2 - Mus musculus (Mouse)	Q9NYQ2
DBDB_19_03.raw	4652	K.TSWDFIEGEADDGITYNDNLAAFR[.R	2	1	328.9	2.503	0.2866	2724.21	0.9379	0.93	98	(Q9NYQ2) HAOX2_MOUSE Hydroxyacid oxidase 2 - Mus musculus (Mouse)	Q9NYQ2
DBDB_24_01.raw	2862	R.SLLDLEANIK.L	2	1	1298.2	2.717	0.1767	1115.63	-	0.91	25	(Q9NYQ2) HAOX2_MOUSE Hydroxyacid oxidase 2 - Mus musculus (Mouse)	Q9NYQ2
DBDB_24_02.raw	2986	R.SLLDLEANIK.L	2	1	1305.2	3.607	0.1565	1115.63	1.13603	0.98	216	(Q9NYQ2) HAOX2_MOUSE Hydroxyacid oxidase 2 - Mus musculus (Mouse)	Q9NYQ2
DBDB_24_02.raw	3393	R.SLLDLEANIK[.L	2	2	809.6	2.345	0.1431	1119.63	-	0.56	9	(Q9NYQ2) HAOX2_MOUSE Hydroxyacid oxidase 2 - Mus musculus (Mouse)	Q9NYQ2
DBDB_24_03.raw	2869	R.SLLDLEANIK[.L	2	2	921.3	2.617	0.1507	1119.63	0.92136	0.72	20	(Q9NYQ2) HAOX2_MOUSE Hydroxyacid oxidase 2 - Mus musculus (Mouse)	Q9NYQ2
DBDB_22_02.raw	3280	R.SVAEISPDLIQFSR.L	2	1	1165.2	4.631	0.4506	1561.82	1.00095	0.85	41	(Q9NYQ2) HAOX2_MOUSE Hydroxyacid oxidase 2 - Mus musculus (Mouse)	Q9NYQ2
DBDB_22_01.raw	3215	R.SVAEISPDLIQFSR[.L	2	1	974.6	3.962	0.3393	1565.82	1.08985	0.96	15	(Q9NYQ2) HAOX2_MOUSE Hydroxyacid oxidase 2 - Mus musculus (Mouse)	Q9NYQ2
DBDB_22_03.raw	3174	R.SVAEISPDLIQFSR[.L	2	1	1036.3	4.288	0.3932	1565.82	1.08947	0.87	76	(Q9NYQ2) HAOX2_MOUSE Hydroxyacid oxidase 2 - Mus musculus (Mouse)	Q9NYQ2
DBDB_27_02.raw	4068	R.TTIQGQEINAPICISPTAFHSIAWADGEK.S	3	1	829.4	5.684	0.5015	3155.55	0.77179	0.99	299	(Q9NYQ2) HAOX2_MOUSE Hydroxyacid oxidase 2 - Mus musculus (Mouse)	Q9NYQ2
DBDB_27_01.raw	3948	R.TTIQGQEINAPICISPTAFHSIAWADGEK[.S	3	1	513.9	4.788	0.3338	3159.55	0.57966	0.98	98	(Q9NYQ2) HAOX2_MOUSE Hydroxyacid oxidase 2 - Mus musculus (Mouse)	Q9NYQ2
DBDB_27_02.raw	4078	R.TTIQGQEINAPICISPTAFHSIAWADGEK[.S	4	1	1315.7	4.544	0.4855	3159.55	-	0.89	91	(Q9NYQ2) HAOX2_MOUSE Hydroxyacid oxidase 2 - Mus musculus (Mouse)	Q9NYQ2
DBDB_27_03.raw	3971	R.TTIQGQEINAPICISPTAFHSIAWADGEK[.S	3	1	823	5.932	0.4193	3159.55	0.50297	0.97	98	(Q9NYQ2) HAOX2_MOUSE Hydroxyacid oxidase 2 - Mus musculus (Mouse)	Q9NYQ2
DBDB_05_01.raw	3354	K.LQAAM*KVLAISPEEQK.T	2	1	485.8	2.201	0.2033	1771.96	0.69694	0.96	82	(Q9JMH9) MY18A_MOUSE Myosin-XVIIIa - Mus musculus (Mouse)	Q9JMH9	1.01344	0.427214
DBDB_05_01.raw	3370	K.LQAAM*KVLAISPEEQK[.T	2	2	532.8	2.744	0.151	1775.96	0.74107	0.86	71	(Q9JMH9) MY18A_MOUSE Myosin-XVIIIa - Mus musculus (Mouse)	Q9JMH9
DBDB_23_02.raw	2002	R.ISELTSELTDER[.N	2	1	1429	2.586	0.3236	1396.69	0.99183	0.78	38	(Q9JMH9) MY18A_MOUSE Myosin-XVIIIa - Mus musculus (Mouse)	Q9JMH9
DBDB_22_02.raw	1117	R.LGDLQADSDESQR.A	2	1	698	2.61	0.1835	1433.65	1.62394	0.96	146	(Q9JMH9) MY18A_MOUSE Myosin-XVIIIa - Mus musculus (Mouse)	Q9JMH9
DBDB_26_01.raw	2934	R.WGLGGTCVNVGCIPK.K	2	1	1866.4	3.682	0.361	1617.8	SHARED	0.97	149	(Q9JMH6) TRXR1_MOUSE Thioredoxin reductase 1, cytoplasmic - Mus musculus (Mous	Q9JMH6	NA	NA
DBDB_26_02.raw	2926	R.WGLGGTCVNVGCIPK.K	2	1	2171	3.4	0.358	1617.8	SHARED	0.85	3	(Q9JMH6) TRXR1_MOUSE Thioredoxin reductase 1, cytoplasmic - Mus musculus (Mous	Q9JMH6
DBDB_25_02.raw	2885	R.WGLGGTCVNVGCIPK[.K	2	1	1127.7	4.101	0.3957	1621.8	SHARED	0.95	69	(Q9JMH6) TRXR1_MOUSE Thioredoxin reductase 1, cytoplasmic - Mus musculus (Mous	Q9JMH6
DBDB_26_03.raw	2920	R.WGLGGTCVNVGCIPK[.K	2	1	2036	4.466	0.4471	1621.8	SHARED	0.93	66	(Q9JMH6) TRXR1_MOUSE Thioredoxin reductase 1, cytoplasmic - Mus musculus (Mous	Q9JMH6
DBDB_23_01.raw	3826	K.WDSNVIETFDIAR.L	2	1	838.1	2.927	0.2238	1565.76	1.04869	0.97	112	(Q9JMD3) PCTL_MOUSE PCTP-like protein - Mus musculus (Mouse)	Q9JMD3	1.01879	0.0953559
DBDB_22_01.raw	1851	R.ESVQVPDDQDFR[.S	2	1	324.9	2.767	0.1631	1438.65	1.11919	0.68	8	(Q9JMD3) PCTL_MOUSE PCTP-like protein - Mus musculus (Mouse)	Q9JMD3
DBDB_28_02.raw	5017	R.M*ECCDVPAETLYDVLHDIEYR.K	3	1	517.3	3.792	0.3949	2644.15	0.89113	0.94	36	(Q9JMD3) PCTL_MOUSE PCTP-like protein - Mus musculus (Mouse)	Q9JMD3
DBDB_28_03.raw	5016	R.M*ECCDVPAETLYDVLHDIEYR.K	3	1	398	3.351	0.3019	2644.15	1.01615	0.96	80	(Q9JMD3) PCTL_MOUSE PCTP-like protein - Mus musculus (Mouse)	Q9JMD3
DBDB_19_03.raw	1187	R.EADDESLDEQASASK.L	2	1	525.2	3.829	0.4916	1594.67	1.17015	0.9	5	(Q9JM96) BORG4_MOUSE Cdc42 effector protein 4 - Mus musculus (Mouse)	Q9JM96	1.17015	NA
DBDB_31_03.raw	3699	R.EMNDMKDTEVFICTTPLLK[.Y	3	2	532.5	3.132	0.1369	2289.09	-	0.84	5	(Q9JM14) NT5C_MOUSE 5'(3')-deoxyribonucleotidase, cytosolic type - Mus musculu	Q9JM14	NA	NA
DBDB_25_01.raw	2798	R.WVEQNLGPEFVER.I	2	1	906.3	3.845	0.532	1602.79	-	0.95	137	(Q9JM14) NT5C_MOUSE 5'(3')-deoxyribonucleotidase, cytosolic type - Mus musculu	Q9JM14
DBDB_22_01.raw	2295	R.GPVFGEPPTPLQETR.I	2	1	495	3.775	0.5054	1624.83	-	0.93	78	(Q9JLZ8) SIGIR_MOUSE Single Ig IL-1-related receptor - Mus musculus (Mouse)	Q9JLZ8	0.9166	NA
DBDB_22_02.raw	2408	R.GPVFGEPPTPLQETR.I	2	1	894.1	4.367	0.5514	1624.83	0.9166	0.95	155	(Q9JLZ8) SIGIR_MOUSE Single Ig IL-1-related receptor - Mus musculus (Mouse)	Q9JLZ8
DBDB_33_01.raw	2799	K.AVGLISHVLEQNQEGDAAYR[.K	3	1	1812.1	4.152	0.327	2174.09	1.12532	0.87	51	(Q9JLZ3) AUHM_MOUSE Methylglutaconyl-CoA hydratase, mitochondrial precursor -	Q9JLZ3	1.03699	0.192676
DBDB_24_03.raw	2290	R.EFLPQGPVAMR.V	2	1	458.3	2.727	0.3458	1244.65	0.96529	0.97	179	(Q9JLZ3) AUHM_MOUSE Methylglutaconyl-CoA hydratase, mitochondrial precursor -	Q9JLZ3
DBDB_26_02.raw	2377	R.LEGLLAFK.E	2	1	562	2.672	0.3804	890.535	0.9517	0.86	60	(Q9JLZ3) AUHM_MOUSE Methylglutaconyl-CoA hydratase, mitochondrial precursor -	Q9JLZ3
DBDB_26_03.raw	2366	R.LEGLLAFK[.E	2	1	586.9	2.869	0.262	894.535	0.8204	0.89	27	(Q9JLZ3) AUHM_MOUSE Methylglutaconyl-CoA hydratase, mitochondrial precursor -	Q9JLZ3
DBDB_23_03.raw	2722	R.SEVPGIFCAGADLK.E	2	1	633.7	3.169	0.3951	1463.73	1.32224	0.77	1	(Q9JLZ3) AUHM_MOUSE Methylglutaconyl-CoA hydratase, mitochondrial precursor -	Q9JLZ3
DBDB_23_01.raw	1834	K.VAVADYVEPSPR.G	2	1	1727.4	3.199	0.5056	1302.67	0.52301	0.98	122	(Q9JLT4) TRXR2_MOUSE Thioredoxin reductase 2, mitochondrial precursor - Mus mu	Q9JLT4	0.521205	0.00255266
DBDB_23_03.raw	1817	K.VAVADYVEPSPR.G	2	1	1609.8	3.291	0.3018	1302.67	0.5194	0.96	115	(Q9JLT4) TRXR2_MOUSE Thioredoxin reductase 2, mitochondrial precursor - Mus mu	Q9JLT4
DBDB_22_02.raw	4128	R.WLVGGPDPDLLSSIR.T	2	1	1367	3.251	0.3506	1624.87	1.45079	0.89	25	(Q9JLT2) TREA_MOUSE Trehalase precursor - Mus musculus (Mouse)	Q9JLT2	1.45079	NA
DBDB_20_02.raw	4153	K.EGVFPDNFAVQISELDK.D	2	1	428.6	2.318	0.3411	1907.94	0.7225	0.97	83	(Q9JLQ0) CD2AP_MOUSE CD2-associated protein - Mus musculus (Mouse)	Q9JLQ0	0.82898	0.150585
DBDB_33_03.raw	1298	R.TQNVEVTKPDVDGK.I	2	1	1446.1	3.975	0.4219	1529.78	0.93546	0.97	114	(Q9JLQ0) CD2AP_MOUSE CD2-associated protein - Mus musculus (Mouse)	Q9JLQ0
DBDB_33_03.raw	1290	R.TQNVEVTKPDVDGK[.I	3	1	500.2	4.051	0.4204	1533.78	-	0.96	83	(Q9JLQ0) CD2AP_MOUSE CD2-associated protein - Mus musculus (Mouse)	Q9JLQ0
DBDB_17_02.raw	3729	R.DLELAVPGTYDPNQPIIR.I	2	1	418.2	4.14	0.4906	2011.05	1.05128	0.92	153	(Q9JLN9) FRAP_MOUSE FKBP12-rapamycin complex-associated protein - Mus musculus	Q9JLN9	0.967127	0.0775166
DBDB_17_01.raw	3733	R.DLELAVPGTYDPNQPIIR[.I	2	1	582.2	4.34	0.5215	2015.05	0.89864	0.88	53	(Q9JLN9) FRAP_MOUSE FKBP12-rapamycin complex-associated protein - Mus musculus	Q9JLN9
DBDB_17_03.raw	3776	R.DLELAVPGTYDPNQPIIR[.I	2	1	474.9	4.047	0.4718	2015.05	0.95146	0.87	24	(Q9JLN9) FRAP_MOUSE FKBP12-rapamycin complex-associated protein - Mus musculus	Q9JLN9
DBDB_17_01.raw	2039	K.DEIATVETINNGK.S	2	1	1118.7	2.519	0.2175	1403.7	-	0.8	7	(Q9JLJ2) AL9A1_MOUSE 4-trimethylaminobutyraldehyde dehydrogenase - Mus musculu	Q9JLJ2	0.899451	0.199285
DBDB_17_03.raw	2054	K.DEIATVETINNGK.S	2	1	1196.2	2.686	0.2795	1403.7	-	0.9	26	(Q9JLJ2) AL9A1_MOUSE 4-trimethylaminobutyraldehyde dehydrogenase - Mus musculu	Q9JLJ2
DBDB_18_01.raw	1961	K.DEIATVETINNGK.S	2	1	1957.7	2.627	0.1487	1403.7	-	0.95	40	(Q9JLJ2) AL9A1_MOUSE 4-trimethylaminobutyraldehyde dehydrogenase - Mus musculu	Q9JLJ2
DBDB_18_02.raw	1993	K.DEIATVETINNGK.S	2	1	2290.4	2.895	0.1917	1403.7	-	0.97	156	(Q9JLJ2) AL9A1_MOUSE 4-trimethylaminobutyraldehyde dehydrogenase - Mus musculu	Q9JLJ2
DBDB_18_03.raw	1913	K.DEIATVETINNGK.S	2	1	2059.7	2.641	0.1497	1403.7	-	0.97	137	(Q9JLJ2) AL9A1_MOUSE 4-trimethylaminobutyraldehyde dehydrogenase - Mus musculu	Q9JLJ2
DBDB_17_02.raw	2007	K.DEIATVETINNGK[.S	2	1	1109.7	2.928	0.1316	1407.7	-	0.73	42	(Q9JLJ2) AL9A1_MOUSE 4-trimethylaminobutyraldehyde dehydrogenase - Mus musculu	Q9JLJ2
DBDB_20_01.raw	2245	K.EQGATVLCGGEVYVPEDPK.L	2	1	833.4	4.293	0.4145	2047.97	-	0.95	135	(Q9JLJ2) AL9A1_MOUSE 4-trimethylaminobutyraldehyde dehydrogenase - Mus musculu	Q9JLJ2
DBDB_20_02.raw	2454	K.EQGATVLCGGEVYVPEDPK.L	2	1	1260.8	5.207	0.5403	2047.97	0.90915	0.92	17	(Q9JLJ2) AL9A1_MOUSE 4-trimethylaminobutyraldehyde dehydrogenase - Mus musculu	Q9JLJ2
DBDB_20_03.raw	2559	K.EQGATVLCGGEVYVPEDPK.L	2	1	1411.1	5.008	0.5241	2047.97	0.943	0.5	34	(Q9JLJ2) AL9A1_MOUSE 4-trimethylaminobutyraldehyde dehydrogenase - Mus musculu	Q9JLJ2
DBDB_20_03.raw	2573	K.EQGATVLCGGEVYVPEDPK.L	3	1	1666.7	4.451	0.4007	2047.97	0.70312	0.96	59	(Q9JLJ2) AL9A1_MOUSE 4-trimethylaminobutyraldehyde dehydrogenase - Mus musculu	Q9JLJ2
DBDB_20_02.raw	2466	K.EQGATVLCGGEVYVPEDPK[.L	2	1	1009.7	5.664	0.5405	2051.97	0.84628	0.95	3	(Q9JLJ2) AL9A1_MOUSE 4-trimethylaminobutyraldehyde dehydrogenase - Mus musculu	Q9JLJ2
DBDB_39_01.raw	1811	K.GVKPITLELGGK[.S	3	2	1111.4	3.152	0.1923	1215.74	0.75026	0.94	57	(Q9JLJ2) AL9A1_MOUSE 4-trimethylaminobutyraldehyde dehydrogenase - Mus musculu	Q9JLJ2
DBDB_25_02.raw	1932	K.ISFTGSVPTGVK[.I	2	2	435.6	3.196	0.4068	1196.66	1.27599	0.81	7	(Q9JLJ2) AL9A1_MOUSE 4-trimethylaminobutyraldehyde dehydrogenase - Mus musculu	Q9JLJ2
DBDB_22_01.raw	3243	K.SPLIIFSDCNMENAVK.G	2	1	1230.6	3.781	0.4782	1837.89	0.83029	0.93	77	(Q9JLJ2) AL9A1_MOUSE 4-trimethylaminobutyraldehyde dehydrogenase - Mus musculu	Q9JLJ2
DBDB_22_02.raw	3289	K.SPLIIFSDCNMENAVK.G	2	1	1394.4	3.827	0.3745	1837.89	0.92845	0.94	83	(Q9JLJ2) AL9A1_MOUSE 4-trimethylaminobutyraldehyde dehydrogenase - Mus musculu	Q9JLJ2
DBDB_22_01.raw	3267	K.SPLIIFSDCNMENAVK[.G	2	1	576.1	4.409	0.342	1841.89	1.39993	0.99	272	(Q9JLJ2) AL9A1_MOUSE 4-trimethylaminobutyraldehyde dehydrogenase - Mus musculu	Q9JLJ2
DBDB_22_03.raw	3226	K.SPLIIFSDCNMENAVK[.G	2	1	852.3	3.312	0.1717	1841.89	1.02807	0.98	146	(Q9JLJ2) AL9A1_MOUSE 4-trimethylaminobutyraldehyde dehydrogenase - Mus musculu	Q9JLJ2
DBDB_38_01.raw	1796	R.M*GPLINAPHLER.V	2	1	792	3.017	0.3001	1363.72	0.92557	0.92	30	(Q9JLJ2) AL9A1_MOUSE 4-trimethylaminobutyraldehyde dehydrogenase - Mus musculu	Q9JLJ2
DBDB_38_02.raw	1744	R.M*GPLINAPHLER.V	2	1	789.2	3.216	0.3638	1363.72	0.89756	0.9	41	(Q9JLJ2) AL9A1_MOUSE 4-trimethylaminobutyraldehyde dehydrogenase - Mus musculu	Q9JLJ2
DBDB_38_02.raw	1792	R.M*GPLINAPHLER.V	3	1	886.7	3.41	0.2969	1363.72	0.60648	0.88	44	(Q9JLJ2) AL9A1_MOUSE 4-trimethylaminobutyraldehyde dehydrogenase - Mus musculu	Q9JLJ2
DBDB_38_03.raw	1928	R.M*GPLINAPHLER.V	3	1	606.3	3.14	0.2949	1363.72	0.5182	0.93	122	(Q9JLJ2) AL9A1_MOUSE 4-trimethylaminobutyraldehyde dehydrogenase - Mus musculu	Q9JLJ2
DBDB_38_02.raw	1753	R.M*GPLINAPHLER[.V	2	1	802.3	2.94	0.3122	1367.72	0.87489	0.82	97	(Q9JLJ2) AL9A1_MOUSE 4-trimethylaminobutyraldehyde dehydrogenase - Mus musculu	Q9JLJ2
DBDB_38_01.raw	2191	R.MGPLINAPHLER.V	2	1	828.7	3.332	0.3757	1347.72	0.89868	0.95	83	(Q9JLJ2) AL9A1_MOUSE 4-trimethylaminobutyraldehyde dehydrogenase - Mus musculu	Q9JLJ2
DBDB_38_02.raw	2097	R.MGPLINAPHLER.V	2	1	841.6	3.1	0.4183	1347.72	0.90687	0.98	146	(Q9JLJ2) AL9A1_MOUSE 4-trimethylaminobutyraldehyde dehydrogenase - Mus musculu	Q9JLJ2
DBDB_38_03.raw	2197	R.MGPLINAPHLER.V	2	1	857.3	2.84	0.3105	1347.72	0.94724	0.61	7	(Q9JLJ2) AL9A1_MOUSE 4-trimethylaminobutyraldehyde dehydrogenase - Mus musculu	Q9JLJ2
DBDB_38_01.raw	2196	R.MGPLINAPHLER[.V	2	1	602.3	3.075	0.2887	1351.72	0.89953	0.88	41	(Q9JLJ2) AL9A1_MOUSE 4-trimethylaminobutyraldehyde dehydrogenase - Mus musculu	Q9JLJ2
DBDB_27_02.raw	5096	R.VDVEDLGVDFLTIVGHK.F	3	1	769.8	3.663	0.3664	1855.98	0.56958	0.93	100	(Q9JLI6) SCLY_MOUSE Selenocysteine lyase - Mus musculus (Mouse)	Q9JLI6	0.994508	0.225412
DBDB_28_01.raw	5035	R.VDVEDLGVDFLTIVGHK[.F	3	1	908.2	4.843	0.447	1859.98	1.06631	0.96	164	(Q9JLI6) SCLY_MOUSE Selenocysteine lyase - Mus musculus (Mouse)	Q9JLI6
DBDB_28_02.raw	5012	R.VDVEDLGVDFLTIVGHK[.F	3	1	886.5	4.199	0.3227	1859.98	0.92642	0.95	52	(Q9JLI6) SCLY_MOUSE Selenocysteine lyase - Mus musculus (Mouse)	Q9JLI6
DBDB_28_03.raw	5021	R.VDVEDLGVDFLTIVGHK[.F	3	1	811.7	3.974	0.388	1859.98	1.09152	0.66	14	(Q9JLI6) SCLY_MOUSE Selenocysteine lyase - Mus musculus (Mouse)	Q9JLI6
DBDB_36_01.raw	1658	R.VLVHTDAAQALGK.R	2	1	600.5	3.035	0.4785	1322.74	1.12718	0.95	15	(Q9JLI6) SCLY_MOUSE Selenocysteine lyase - Mus musculus (Mouse)	Q9JLI6
DBDB_36_03.raw	1657	R.VLVHTDAAQALGK.R	2	1	604.3	3.168	0.442	1322.74	1.18604	0.92	73	(Q9JLI6) SCLY_MOUSE Selenocysteine lyase - Mus musculus (Mouse)	Q9JLI6
DBDB_26_03.raw	2034	K.FCGSTLPQVIK[.S	2	1	706.9	2.281	0.2423	1253.67	0.92091	0.97	112	(Q9JLB4) CUBN_MOUSE Cubilin precursor - Mus musculus (Mouse)	Q9JLB4	1.01861	0.276966
DBDB_23_01.raw	2287	K.FCTSLSTPPLQTTGPAAR[.I	2	1	444.2	3.744	0.3785	1908.96	0.64699	0.77	30	(Q9JLB4) CUBN_MOUSE Cubilin precursor - Mus musculus (Mouse)	Q9JLB4
DBDB_46_01.raw	1172	K.HGICEDLQR.V	2	1	939.2	2.723	0.1952	1127.53	0.88752	0.91	5	(Q9JLB4) CUBN_MOUSE Cubilin precursor - Mus musculus (Mouse)	Q9JLB4
DBDB_46_01.raw	1176	K.HGICEDLQR[.V	2	1	1040.2	2.963	0.3992	1131.53	0.87012	0.92	82	(Q9JLB4) CUBN_MOUSE Cubilin precursor - Mus musculus (Mouse)	Q9JLB4
DBDB_33_01.raw	2588	K.LNDDDLGECLHQIQR.N	2	1	2651.4	4.538	0.3396	1825.86	0.74227	0.82	33	(Q9JLB4) CUBN_MOUSE Cubilin precursor - Mus musculus (Mouse)	Q9JLB4
DBDB_33_03.raw	2549	K.LNDDDLGECLHQIQR.N	2	1	2636.8	4.545	0.3253	1825.86	0.70299	0.93	53	(Q9JLB4) CUBN_MOUSE Cubilin precursor - Mus musculus (Mouse)	Q9JLB4
DBDB_39_01.raw	1894	K.NIFGNDNIVGTHGK.I	2	1	1254.2	3.79	0.4827	1485.74	1.31528	0.77	89	(Q9JLB4) CUBN_MOUSE Cubilin precursor - Mus musculus (Mouse)	Q9JLB4
DBDB_39_02.raw	1975	K.NIFGNDNIVGTHGK[.I	2	1	1230.1	3.84	0.2841	1489.74	1.22108	0.97	105	(Q9JLB4) CUBN_MOUSE Cubilin precursor - Mus musculus (Mouse)	Q9JLB4
DBDB_32_02.raw	1923	K.SFVSPDHDSDGLYDK[.G	2	1	1029.7	4.333	0.4748	1685.73	1.81444	0.84	41	(Q9JLB4) CUBN_MOUSE Cubilin precursor - Mus musculus (Mouse)	Q9JLB4
DBDB_22_01.raw	2988	K.TSGILESINYPNPYDK.D	2	1	398.7	3.137	0.4107	1810.89	0.86851	0.78	17	(Q9JLB4) CUBN_MOUSE Cubilin precursor - Mus musculus (Mouse)	Q9JLB4
DBDB_22_02.raw	3035	K.TSGILESINYPNPYDK.D	2	1	814.2	3.787	0.3656	1810.89	-	0.97	119	(Q9JLB4) CUBN_MOUSE Cubilin precursor - Mus musculus (Mouse)	Q9JLB4
DBDB_22_03.raw	2942	K.TSGILESINYPNPYDK.D	2	1	767.9	3.902	0.4445	1810.89	0.92969	0.96	118	(Q9JLB4) CUBN_MOUSE Cubilin precursor - Mus musculus (Mouse)	Q9JLB4
DBDB_22_01.raw	2960	K.TSGILESINYPNPYDK[.D	2	1	742.4	4.103	0.3725	1814.89	1.11214	0.96	107	(Q9JLB4) CUBN_MOUSE Cubilin precursor - Mus musculus (Mouse)	Q9JLB4
DBDB_31_01.raw	2842	K.TSGILESINYPNPYDKDQR[.C	3	1	621	4.119	0.3147	2214.07	0.83871	0.98	114	(Q9JLB4) CUBN_MOUSE Cubilin precursor - Mus musculus (Mouse)	Q9JLB4
DBDB_21_03.raw	1923	R.DFQSLQQNVER.K	2	1	1463.9	3.21	0.2543	1363.66	0.39926	0.89	40	(Q9JLB4) CUBN_MOUSE Cubilin precursor - Mus musculus (Mouse)	Q9JLB4
DBDB_22_02.raw	1890	R.DFQSLQQNVER.K	2	1	1322.8	3.752	0.2612	1363.66	0.82565	0.95	30	(Q9JLB4) CUBN_MOUSE Cubilin precursor - Mus musculus (Mouse)	Q9JLB4
DBDB_20_02.raw	1995	R.DSSCSQGDYLVLR.N	2	1	711.4	2.634	0.4309	1499.69	0.9295	0.62	29	(Q9JLB4) CUBN_MOUSE Cubilin precursor - Mus musculus (Mouse)	Q9JLB4
DBDB_20_03.raw	2108	R.DSSCSQGDYLVLR.N	2	1	1448.2	3.306	0.4377	1499.69	1.17436	0.98	146	(Q9JLB4) CUBN_MOUSE Cubilin precursor - Mus musculus (Mouse)	Q9JLB4
DBDB_20_02.raw	2014	R.DSSCSQGDYLVLR[.N	2	1	1856.5	4.283	0.334	1503.69	1.02604	0.95	70	(Q9JLB4) CUBN_MOUSE Cubilin precursor - Mus musculus (Mouse)	Q9JLB4
DBDB_21_03.raw	1890	R.ETIGPQQGCGGYLTEDSK.S	2	1	832.4	4.39	0.5241	1939.88	1.09738	0.91	35	(Q9JLB4) CUBN_MOUSE Cubilin precursor - Mus musculus (Mouse)	Q9JLB4
DBDB_21_01.raw	1844	R.ETIGPQQGCGGYLTEDSK[.S	2	1	726.8	4.814	0.5255	1943.88	1.3063	0.97	199	(Q9JLB4) CUBN_MOUSE Cubilin precursor - Mus musculus (Mouse)	Q9JLB4
DBDB_21_02.raw	1787	R.ETIGPQQGCGGYLTEDSK[.S	2	1	660.7	4.71	0.5048	1943.88	1.36362	0.79	7	(Q9JLB4) CUBN_MOUSE Cubilin precursor - Mus musculus (Mouse)	Q9JLB4
DBDB_21_02.raw	1794	R.ETIGPQQGCGGYLTEDSK[.S	3	1	2426.9	5.667	0.3978	1943.88	1.26402	0.87	144	(Q9JLB4) CUBN_MOUSE Cubilin precursor - Mus musculus (Mouse)	Q9JLB4
DBDB_21_03.raw	1864	R.ETIGPQQGCGGYLTEDSK[.S	2	1	547.2	4.966	0.5153	1943.88	1.32897	0.98	190	(Q9JLB4) CUBN_MOUSE Cubilin precursor - Mus musculus (Mouse)	Q9JLB4
DBDB_41_01.raw	2427	R.EVCGGDLHGPTGTFTSPNYPNPNPHPR.I	3	1	1171.6	5.926	0.5215	2918.34	0.75382	0.95	15	(Q9JLB4) CUBN_MOUSE Cubilin precursor - Mus musculus (Mouse)	Q9JLB4
DBDB_41_03.raw	2401	R.EVCGGDLHGPTGTFTSPNYPNPNPHPR.I	3	1	922.8	5.845	0.5318	2918.34	-	0.94	67	(Q9JLB4) CUBN_MOUSE Cubilin precursor - Mus musculus (Mouse)	Q9JLB4
DBDB_30_02.raw	2946	R.EYLQIHDGDSSADFPLGR.Y	3	1	865.5	3.908	0.3572	2019.94	1.10136	0.92	64	(Q9JLB4) CUBN_MOUSE Cubilin precursor - Mus musculus (Mouse)	Q9JLB4
DBDB_24_01.raw	2033	R.FEDFNLQSSPGCAK.D	2	1	1917.5	3.748	0.2359	1599.72	-	0.94	19	(Q9JLB4) CUBN_MOUSE Cubilin precursor - Mus musculus (Mouse)	Q9JLB4
DBDB_24_02.raw	1802	R.FVSDGSGTGMGFQAR.F	2	1	1453.2	3.804	0.5358	1516.68	0.58578	0.94	16	(Q9JLB4) CUBN_MOUSE Cubilin precursor - Mus musculus (Mouse)	Q9JLB4
DBDB_23_03.raw	2169	R.FVTDGSVTDSGFR.L	2	1	568.8	2.485	0.1877	1387.65	1.07655	0.84	5	(Q9JLB4) CUBN_MOUSE Cubilin precursor - Mus musculus (Mouse)	Q9JLB4
DBDB_23_01.raw	2167	R.FVTDGSVTDSGFR[.L	2	1	946.8	2.825	0.1686	1391.65	0.92285	0.97	142	(Q9JLB4) CUBN_MOUSE Cubilin precursor - Mus musculus (Mouse)	Q9JLB4
DBDB_23_03.raw	2180	R.FVTDGSVTDSGFR[.L	2	1	893.9	3.615	0.4313	1391.65	1.18112	0.88	146	(Q9JLB4) CUBN_MOUSE Cubilin precursor - Mus musculus (Mouse)	Q9JLB4
DBDB_42_02.raw	1294	R.GEIHSPNYPNNYR.A	2	1	668.8	3.184	0.3173	1560.72	1.16875	0.95	119	(Q9JLB4) CUBN_MOUSE Cubilin precursor - Mus musculus (Mouse)	Q9JLB4
DBDB_42_03.raw	1272	R.GEIHSPNYPNNYR.A	2	1	431.8	2.546	0.1938	1560.72	1.00673	0.97	115	(Q9JLB4) CUBN_MOUSE Cubilin precursor - Mus musculus (Mouse)	Q9JLB4
DBDB_42_01.raw	1264	R.GEIHSPNYPNNYR[.A	2	1	370	3.09	0.2834	1564.72	1.21275	0.84	14	(Q9JLB4) CUBN_MOUSE Cubilin precursor - Mus musculus (Mouse)	Q9JLB4
DBDB_16_01.raw	1603	R.NGDSPGSPIIGR.Y	2	1	918.5	2.472	0.2307	1169.59	-	0.78	1	(Q9JLB4) CUBN_MOUSE Cubilin precursor - Mus musculus (Mouse)	Q9JLB4
DBDB_16_02.raw	1600	R.NGDSPGSPIIGR.Y	2	1	887.9	2.124	0.1968	1169.59	-	0.9	4	(Q9JLB4) CUBN_MOUSE Cubilin precursor - Mus musculus (Mouse)	Q9JLB4
DBDB_22_03.raw	3093	K.EGGSAGLIPSQFLEEK[.R	2	1	490.4	3.365	0.2525	1665.84	1.13618	0.92	29	(Q9JLB0) MPP6_MOUSE MAGUK p55 subfamily member 6 - Mus musculus (Mouse)	Q9JLB0	1.13618	NA
DBDB_14_02.raw	5664	K.FVSRSEM*EADIK[.A	2	1	635.4	2	0.2265	1431.68	-	0.69	23	(Q9JLB0) MPP6_MOUSE MAGUK p55 subfamily member 6 - Mus musculus (Mouse)	Q9JLB0
DBDB_22_01.raw	2692	K.SADAVSVIPVLQR[.T	2	2	708.5	2.809	0.185	1358.77	1.21386	0.86	33	(Q9JKX6) NUDT5_MOUSE ADP-sugar pyrophosphatase - Mus musculus (Mouse)	Q9JKX6	1.21386	NA
DBDB_22_01.raw	1413	K.SLAASGAQQPDSPGGPQPPGQK[.R	2	1	688.6	3.668	0.4155	2079.02	1.00406	0.9	7	(Q9JKS5) HABP4_MOUSE Intracellular hyaluronan-binding protein 4 - Mus musculus	Q9JKS5	1.00571	0.00234052
DBDB_22_02.raw	1403	K.SLAASGAQQPDSPGGPQPPGQK[.R	3	1	997.1	5.43	0.3924	2079.02	1.00737	0.94	50	(Q9JKS5) HABP4_MOUSE Intracellular hyaluronan-binding protein 4 - Mus musculus	Q9JKS5
DBDB_38_02.raw	11270	K.AHFNLDESGVLSLDR.V	3	1	603.5	3.032	0.2858	1672.83	1.19403	0.84	19	(Q9JKR6) HYOU1_MOUSE Hypoxia up-regulated protein 1 precursor - Mus musculus (	Q9JKR6	1.11926	0.158736
DBDB_19_02.raw	3878	K.DAVITVPAFFNQAER.R	2	1	748.6	3.497	0.4861	1677.86	1.1572	0.92	71	(Q9JKR6) HYOU1_MOUSE Hypoxia up-regulated protein 1 precursor - Mus musculus (	Q9JKR6
DBDB_19_01.raw	1508	K.EEAEPPAEETSQPPPSEPK.G	2	1	1018.3	3.78	0.3849	2048.93	1.02776	0.92	148	(Q9JKR6) HYOU1_MOUSE Hypoxia up-regulated protein 1 precursor - Mus musculus (	Q9JKR6
DBDB_19_02.raw	1457	K.EEAEPPAEETSQPPPSEPK.G	3	1	1203.1	4.354	0.4128	2048.93	1.17384	0.96	140	(Q9JKR6) HYOU1_MOUSE Hypoxia up-regulated protein 1 precursor - Mus musculus (	Q9JKR6
DBDB_19_03.raw	1502	K.EEAEPPAEETSQPPPSEPK.G	2	1	1068.6	3.322	0.3633	2048.93	-	0.96	101	(Q9JKR6) HYOU1_MOUSE Hypoxia up-regulated protein 1 precursor - Mus musculus (	Q9JKR6
DBDB_19_02.raw	1469	K.EEAEPPAEETSQPPPSEPK[.G	2	1	549.9	4.056	0.348	2052.93	1.14449	0.81	6	(Q9JKR6) HYOU1_MOUSE Hypoxia up-regulated protein 1 precursor - Mus musculus (	Q9JKR6
DBDB_19_03.raw	1520	K.EEAEPPAEETSQPPPSEPK[.G	2	1	365.1	3.779	0.3199	2052.93	-	0.92	179	(Q9JKR6) HYOU1_MOUSE Hypoxia up-regulated protein 1 precursor - Mus musculus (	Q9JKR6
DBDB_22_01.raw	1765	K.LYQPEYQEVSTEEQR.E	2	1	1589.4	5.646	0.4928	1898.88	1.01651	0.91	56	(Q9JKR6) HYOU1_MOUSE Hypoxia up-regulated protein 1 precursor - Mus musculus (	Q9JKR6
DBDB_22_02.raw	1850	K.LYQPEYQEVSTEEQR.E	2	1	1579.1	4.457	0.4406	1898.88	0.8888	0.76	18	(Q9JKR6) HYOU1_MOUSE Hypoxia up-regulated protein 1 precursor - Mus musculus (	Q9JKR6
DBDB_22_03.raw	1771	K.LYQPEYQEVSTEEQR.E	2	1	1301.8	4.821	0.4838	1898.88	1.09462	0.89	39	(Q9JKR6) HYOU1_MOUSE Hypoxia up-regulated protein 1 precursor - Mus musculus (	Q9JKR6
DBDB_32_03.raw	3022	K.VAIVKPGVPMEIVLNK[.E	3	1	1596.8	4.001	0.4001	1711.02	1.06462	0.94	78	(Q9JKR6) HYOU1_MOUSE Hypoxia up-regulated protein 1 precursor - Mus musculus (	Q9JKR6
DBDB_21_01.raw	4133	R.VEFEELCADLFDR[.V	2	1	1842.3	3.999	0.4195	1646.75	1.44975	0.98	206	(Q9JKR6) HYOU1_MOUSE Hypoxia up-regulated protein 1 precursor - Mus musculus (	Q9JKR6
DBDB_21_02.raw	4104	R.VEFEELCADLFDR[.V	2	1	1869.5	4.356	0.5375	1646.75	1.31161	0.93	52	(Q9JKR6) HYOU1_MOUSE Hypoxia up-regulated protein 1 precursor - Mus musculus (	Q9JKR6
DBDB_19_02.raw	4149	R.VESVFETLVEDSPEEESTLTK[.L	2	1	711.3	3.337	0.3765	2372.13	0.90792	0.94	77	(Q9JKR6) HYOU1_MOUSE Hypoxia up-regulated protein 1 precursor - Mus musculus (	Q9JKR6
DBDB_21_01.raw	2194	K.FDVPGDENAEMDAR.T	2	1	479.2	3.647	0.218	1565.65	0.67819	0.95	40	(Q9JKF1) IQGA1_MOUSE Ras GTPase-activating-like protein IQGAP1 - Mus musculus	Q9JKF1	0.761147	0.110218
DBDB_21_03.raw	2212	K.FDVPGDENAEMDAR.T	2	1	601.5	3.747	0.1869	1565.65	0.8439	0.96	36	(Q9JKF1) IQGA1_MOUSE Ras GTPase-activating-like protein IQGAP1 - Mus musculus	Q9JKF1
DBDB_31_03.raw	4083	K.LEGVLAEVAQHYQDTLIR.A	3	1	1441	3.4899	0.4633	2055.09	-	0.93	61	(Q9JKF1) IQGA1_MOUSE Ras GTPase-activating-like protein IQGAP1 - Mus musculus	Q9JKF1
DBDB_31_03.raw	4083	K.LEGVLAEVAQHYQDTLIR.A	3	1	1441	3.4899	0.4633	2055.09	-	0.87	23	(Q9JKF1) IQGA1_MOUSE Ras GTPase-activating-like protein IQGAP1 - Mus musculus	Q9JKF1
DBDB_31_02.raw	2703	K.LPYDVTPEQALSHEEVK.T	3	1	1289.3	4.5	0.4402	1954.98	0.86782	0.78	50	(Q9JKF1) IQGA1_MOUSE Ras GTPase-activating-like protein IQGAP1 - Mus musculus	Q9JKF1
DBDB_20_01.raw	3787	R.ILAIGLINEALDEGDAQK[.T	2	2	373.8	2.472	0.1915	1887.01	-	0.9	20	(Q9JKF1) IQGA1_MOUSE Ras GTPase-activating-like protein IQGAP1 - Mus musculus	Q9JKF1
DBDB_18_01.raw	3660	R.SPDVGLYGVIPECGETYQSDLAEAK[.K	2	1	364.4	5.092	0.2951	2702.26	0.65468	0.94	136	(Q9JKF1) IQGA1_MOUSE Ras GTPase-activating-like protein IQGAP1 - Mus musculus	Q9JKF1
DBDB_30_03.raw	3164	R.GFGFVTFDDHDPVDK.I	3	1	366.4	2.478	0.306	1695.76	-	0.92	38	(Q9JKC8) AP3M1_MOUSE AP-3 complex subunit mu-1 - Mus musculus (Mouse)	Q9JKC8	NA	NA
DBDB_31_02.raw	1321	K.DGVPEGTQLQAHR.N	2	1	554.3	2.792	0.3639	1407.7	0.89932	0.87	33	(Q9JKB3) DBPA_MOUSE DNA-binding protein A - Mus musculus (Mouse)	Q9JKB3	0.791417	0.0755817
DBDB_36_01.raw	1674	K.EDVFVHQTAIK.K	2	1	443.3	3.128	0.4008	1286.67	SHARED	0.93	34	(Q9JKB3) DBPA_MOUSE DNA-binding protein A - Mus musculus (Mouse)	Q9JKB3
DBDB_21_01.raw	1734	K.GAEAANVTGPDGVPVEGSR.Y	2	1	1276	5.483	0.5806	1782.86	0.75452	0.98	213	(Q9JKB3) DBPA_MOUSE DNA-binding protein A - Mus musculus (Mouse)	Q9JKB3
DBDB_21_02.raw	1679	K.GAEAANVTGPDGVPVEGSR.Y	2	1	943.2	4.851	0.4749	1782.86	0.78431	0.98	77	(Q9JKB3) DBPA_MOUSE DNA-binding protein A - Mus musculus (Mouse)	Q9JKB3
DBDB_21_03.raw	1755	K.GAEAANVTGPDGVPVEGSR.Y	2	1	1104.7	5.242	0.5532	1782.86	0.72752	0.9	17	(Q9JKB3) DBPA_MOUSE DNA-binding protein A - Mus musculus (Mouse)	Q9JKB3
DBDB_20_01.raw	2431	R.SVGDGETVEFDVVEGEK.G	2	1	951.3	4.192	0.4221	1795.82	SHARED	0.96	90	(Q9JKB3) DBPA_MOUSE DNA-binding protein A - Mus musculus (Mouse)	Q9JKB3
DBDB_20_02.raw	2637	R.SVGDGETVEFDVVEGEK[.G	2	1	653.2	3.571	0.5662	1799.82	SHARED	0.96	127	(Q9JKB3) DBPA_MOUSE DNA-binding protein A - Mus musculus (Mouse)	Q9JKB3
DBDB_20_03.raw	2718	R.SVGDGETVEFDVVEGEK[.G	2	1	560.5	3.104	0.3268	1799.82	SHARED	0.88	31	(Q9JKB3) DBPA_MOUSE DNA-binding protein A - Mus musculus (Mouse)	Q9JKB3
DBDB_20_03.raw	2858	R.SVGDGETVEFDVVEGEK[.G	2	1	385.6	2.833	0.241	1799.82	SHARED	0.74	1	(Q9JKB3) DBPA_MOUSE DNA-binding protein A - Mus musculus (Mouse)	Q9JKB3
DBDB_26_03.raw	2202	K.FLENYDAIR.V	2	2	927.9	2.805	0.3085	1140.57	1.12308	0.86	50	(Q9JKB1) UCHL3_MOUSE Ubiquitin carboxyl-terminal hydrolase isozyme L3 - Mus mu	Q9JKB1	1.12308	NA
DBDB_26_01.raw	2201	K.FLENYDAIR[.V	2	2	734.3	2.367	0.1795	1144.57	-	0.84	111	(Q9JKB1) UCHL3_MOUSE Ubiquitin carboxyl-terminal hydrolase isozyme L3 - Mus mu	Q9JKB1
DBDB_20_02.raw	3183	K.TSDETLLEDAIEVCK.K	2	1	1200.4	2.999	0.4028	1722.82	-	0.94	23	(Q9JKB1) UCHL3_MOUSE Ubiquitin carboxyl-terminal hydrolase isozyme L3 - Mus mu	Q9JKB1
DBDB_24_02.raw	2062	K.NQLEEVPSALPR.N	2	1	740.4	2.874	0.2085	1352.72	-	0.92	1	(Q9JK53) PRELP_MOUSE Prolargin precursor - Mus musculus (Mouse)	Q9JK53	NA	NA
DBDB_17_01.raw	3784	K.DTYGDDPVSNQNIQYFLDR.F	2	1	1854	5.094	0.561	2260.02	0.8425	0.89	17	(Q9JK42) PDK2_MOUSE [Pyruvate dehydrogenase [lipoamide]] kinase isozyme 2, mit	Q9JK42	0.632613	0.181768
DBDB_17_02.raw	3750	K.DTYGDDPVSNQNIQYFLDR.F	2	1	2151.4	5.809	0.6023	2260.02	0.52814	0.97	127	(Q9JK42) PDK2_MOUSE [Pyruvate dehydrogenase [lipoamide]] kinase isozyme 2, mit	Q9JK42
DBDB_17_03.raw	3779	K.DTYGDDPVSNQNIQYFLDR.F	2	1	1877.8	4.579	0.6167	2260.02	0.5272	0.94	4	(Q9JK42) PDK2_MOUSE [Pyruvate dehydrogenase [lipoamide]] kinase isozyme 2, mit	Q9JK42
DBDB_39_01.raw	1621	R.SLGTADVHFER[.R	2	1	580.7	3.158	0.1506	1235.61	SHARED	0.84	43	(Q9JJW6) REFP2_MOUSE RNA and export factor-binding protein 2 - Mus musculus (M	Q9JJW6	NA	NA
DBDB_39_03.raw	1648	R.SLGTADVHFER[.R	2	1	594.4	3.208	0.297	1235.61	SHARED	0.85	46	(Q9JJW6) REFP2_MOUSE RNA and export factor-binding protein 2 - Mus musculus (M	Q9JJW6
DBDB_27_01.raw	3329	R.ENVPEDSRPSTGYPLPPQIFNECQYR.G	3	1	570	4.09	0.3191	3093.44	-	0.98	236	(Q9JJU8) SH3L1_MOUSE SH3 domain-binding glutamic acid-rich-like protein - Mus	Q9JJU8	NA	NA
DBDB_33_01.raw	1428	R.LPNQTHPDTPVGDESQAR.V	3	1	659.7	3.864	0.3232	1961.93	0.9387	0.98	261	(Q9JJL8) SYSM_MOUSE Seryl-tRNA synthetase, mitochondrial precursor - Mus muscu	Q9JJL8	0.9387	NA
DBDB_29_01.raw	3961	R.SYYLRGAGAVLQHGLVNFTLSKLVSR[.G	3	1	587.9	3.604	0.1275	2853.58	-	0.97	97	(Q9JJL8) SYSM_MOUSE Seryl-tRNA synthetase, mitochondrial precursor - Mus muscu	Q9JJL8
DBDB_26_01.raw	4108	R.IGSTEVEKPPGLLFQQPDLDSALQVAR.A	3	1	1667.8	6.338	0.496	2908.54	0.64863	0.99	268	(Q9JJG0) TACC2_MOUSE Transforming acidic coiled-coil-containing protein 2 - Mu	Q9JJG0	0.59372	0.0776545
DBDB_26_03.raw	4090	R.IGSTEVEKPPGLLFQQPDLDSALQVAR.A	3	1	1906.9	7.065	0.5712	2908.54	0.53881	0.96	105	(Q9JJG0) TACC2_MOUSE Transforming acidic coiled-coil-containing protein 2 - Mu	Q9JJG0
DBDB_18_01.raw	3795	K.APVVLQPEQIVSEEETPPPLLTK[.E	3	1	1014.8	3.343	0.3643	2518.37	0.79289	0.82	40	(Q9JIX8) ACINU_MOUSE Apoptotic chromatin condensation inducer in the nucleus -	Q9JIX8	0.891778	0.0860958
DBDB_17_01.raw	2741	K.DPSCGQEAAAPSGPQLQVLEPK[.E	2	1	717.5	4.324	0.3808	2283.11	0.85045	0.82	50	(Q9JIX8) ACINU_MOUSE Apoptotic chromatin condensation inducer in the nucleus -	Q9JIX8
DBDB_17_03.raw	2764	K.DPSCGQEAAAPSGPQLQVLEPK[.E	2	1	453.5	3.377	0.1594	2283.11	0.94043	0.92	112	(Q9JIX8) ACINU_MOUSE Apoptotic chromatin condensation inducer in the nucleus -	Q9JIX8
DBDB_21_02.raw	2165	K.ETQIVSLPQEENEVK.S	2	2	383.7	2.578	0.2485	1742.88	0.98334	0.98	144	(Q9JIX8) ACINU_MOUSE Apoptotic chromatin condensation inducer in the nucleus -	Q9JIX8
DBDB_57_02.raw	1314	R.HLSHPEPEQQHVIQR.L	3	1	851.7	4.459	0.4806	1834.93	-	0.83	22	(Q9JIX8) ACINU_MOUSE Apoptotic chromatin condensation inducer in the nucleus -	Q9JIX8
DBDB_20_03.raw	1979	K.AQEVSDEGADQEEEAYLR[.E	2	1	3376.9	6.948	0.5325	2042.88	-	0.92	88	(Q9JIQ3) DBLOH_MOUSE Diablo homolog, mitochondrial precursor - Mus musculus (M	Q9JIQ3	NA	NA
DBDB_19_02.raw	2068	K.DIEPGSPAEAAGLK.N	2	1	560.5	3.016	0.303	1354.68	1.25725	0.65	28	(Q9JIL4) PDZD1_MOUSE PDZ domain-containing protein 1 - Mus musculus (Mouse)	Q9JIL4	1.14111	0.283617
DBDB_19_03.raw	2213	K.DIEPGSPAEAAGLK.N	2	2	401.5	2.586	0.2259	1354.68	0.98713	0.92	39	(Q9JIL4) PDZD1_MOUSE PDZ domain-containing protein 1 - Mus musculus (Mouse)	Q9JIL4
DBDB_19_01.raw	2230	K.DIEPGSPAEAAGLK[.N	2	1	397.1	3.205	0.3768	1358.68	0.94297	0.94	76	(Q9JIL4) PDZD1_MOUSE PDZ domain-containing protein 1 - Mus musculus (Mouse)	Q9JIL4
DBDB_19_02.raw	2185	K.DIEPGSPAEAAGLK[.N	2	1	407	3.176	0.4062	1358.68	1.10221	0.97	93	(Q9JIL4) PDZD1_MOUSE PDZ domain-containing protein 1 - Mus musculus (Mouse)	Q9JIL4
DBDB_19_03.raw	2097	K.DIEPGSPAEAAGLK[.N	2	1	616.5	3.195	0.4189	1358.68	-	0.9	22	(Q9JIL4) PDZD1_MOUSE PDZ domain-containing protein 1 - Mus musculus (Mouse)	Q9JIL4
[truncated: 28,119 more rows]
